# Supplementary material for: Associations of PM2.5 and its components with term preterm rupture of membranes: a retrospective study
Source: PeerJ. 2025 Jan 31;13:e18886. doi: 10.7717/peerj.18886 (PMC11789663; doi:10.7717/peerj.18886)
Supplement: Data S1 [file peerj-13-18886-s003.xlsx]

## Sheet: code
Variable	Code
Ethnicitya	0, Han; 1, Other
Occupationb,	1, Employed; 2,Self-employed; 3, Other
Blood Type,	1, Type A; 2, Type B; 3, Type O; 4, Type AB
Primary,	1, NO; 2, Yes
Anemia,	1, NO; 2, Yes
Adverse reproductive history	1, NO; 2, Yes
Uterine scar,	1, NO; 2, Yes
HBV status	1, NO; 2, Yes
Obesity in pregnancy	1, NO; 2, Yes
Infant gender	1, Male; 2 Female
PROM	0, Control group; 1, Disease group

## Sheet: peerj-106309-peerj-106309-data_
Seq	Age,year	Ethnicity	Occupation_Class	Blood_Type_Class	Marital_Status	Primary	Anemia	Adverse_Reproductive_History	Uterine_scar	HBV_status	Obesity_in_pregnancy	Infant_Gender	Infant_Weight,g	PROM	T1PM25	T2PM25	T3PM25	T1SO4	T2SO4	T3SO4	T1NO3	T2NO3	T3NO3	T1NH4	T2NH4	T3NH4	T1OM	T2OM	T3OM	T1BC	T2BC	T3BC	MeanPM25	MeanSO4	MeanNO3	MeanNH4	MeanOM	MeanBC
1	28	0	1	3	0	0	1	0	0	0	0	1	3150	1	28.069	24.0186	33.7043	5.91668	5.00766	6.39806	3.11538	2.46112	5.73008	2.55919	2.06696	3.98991	7.50597	6.46128	8.8736	1.66576	1.40257	1.71766	28.5973	5.77413	3.76886	2.87202	7.61361	1.59533
2	28	0	3	2	0	0	1	0	0	0	0	2	2950	0	28.069	24.0186	33.1917	5.91668	5.00766	6.27678	3.11538	2.46112	5.67053	2.55919	2.06696	3.93302	7.50597	6.46128	8.69858	1.66576	1.40257	1.6837	28.4265	5.73371	3.74901	2.85306	7.55527	1.58401
3	26	0	1	3	0	0	0	0	0	0	0	2	3150	1	27.6257	24.6855	32.4529	5.8072	5.16299	6.08154	3.04816	2.57923	5.62471	2.50203	2.17389	3.85897	7.36378	6.65524	8.44353	1.63626	1.44061	1.62743	28.2547	5.68391	3.7507	2.84496	7.48752	1.5681
4	26	0	1	3	0	0	0	0	0	1	0	2	2300	0	27.6257	24.6855	32.9843	5.8072	5.16299	6.21336	3.04816	2.57923	5.64193	2.50203	2.17389	3.89505	7.36378	6.65524	8.65189	1.63626	1.44061	1.66998	28.4318	5.72785	3.75644	2.85699	7.55697	1.58228
5	31	0	3	2	0	0	0	0	1	0	0	1	3350	1	27.6257	24.6855	33.5874	5.8072	5.16299	6.33189	3.04816	2.57923	5.72678	2.50203	2.17389	3.96095	7.36378	6.65524	8.82212	1.63626	1.44061	1.70389	28.6329	5.76736	3.78472	2.87896	7.61371	1.59359
6	31	1	3	2	0	0	1	0	1	1	0	1	3350	0	27.6257	24.6855	33.289	5.8072	5.16299	6.27289	3.04816	2.57923	5.68954	2.50203	2.17389	3.93021	7.36378	6.65524	8.73661	1.63626	1.44061	1.68673	28.5334	5.74769	3.77231	2.86871	7.58521	1.58787
7	32	0	1	2	0	0	1	0	0	0	0	2	3000	1	27.3245	24.7887	33.0215	5.7298	5.18436	6.21092	3.00718	2.60946	5.65326	2.47063	2.20325	3.89077	7.26816	6.68477	8.65716	1.61529	1.44578	1.66979	28.3782	5.70836	3.75663	2.85488	7.5367	1.57695
8	32	0	1	3	0	0	0	0	0	1	0	1	3150	0	27.3245	24.7887	34.153	5.7298	5.18436	6.43643	3.00718	2.60946	5.7884	2.47063	2.20325	4.00414	7.26816	6.68477	8.98543	1.61529	1.44578	1.73657	28.7554	5.78353	3.80168	2.89267	7.64612	1.59921
9	31	0	1	3	0	0	0	0	0	0	0	2	2850	1	27.0294	25.146	32.5008	5.65874	5.27018	6.02719	2.96066	2.66557	5.70234	2.42885	2.2515	3.89095	7.16479	6.78829	8.43968	1.59545	1.466	1.62121	28.2254	5.65204	3.77619	2.8571	7.46425	1.56088
10	31	0	1	1	0	0	0	0	0	0	0	1	3150	0	27.0294	25.146	33.845	5.65874	5.27018	6.33356	2.96066	2.66557	5.80133	2.42885	2.2515	3.98816	7.16479	6.78829	8.87542	1.59545	1.466	1.7078	28.6735	5.75416	3.80918	2.8895	7.6095	1.58975
11	27	0	3	2	1	1	1	1	1	0	0	1	2450	0	26.9645	25.3427	32.8857	5.63841	5.31127	6.1377	2.95319	2.6927	5.69726	2.42641	2.26999	3.89864	7.13618	6.85099	8.59409	1.59077	1.47633	1.65008	28.3976	5.69579	3.78105	2.86501	7.52708	1.5724
12	27	0	1	3	0	0	0	0	0	0	0	2	3300	1	26.9645	25.3427	33.5169	5.63841	5.31127	6.26032	2.95319	2.6927	5.78781	2.42641	2.26999	3.96797	7.13618	6.85099	8.77147	1.59077	1.47633	1.6852	28.608	5.73666	3.81123	2.88812	7.58621	1.5841
13	27	0	1	1	0	0	1	0	1	0	0	1	2050	1	26.8557	25.4567	32.5641	5.60233	5.33121	6.05227	2.93238	2.70959	5.71942	2.41404	2.28024	3.89011	7.09555	6.88026	8.44919	1.58189	1.48133	1.62092	28.2922	5.66193	3.78713	2.86147	7.475	1.56138
14	27	0	1	2	0	0	1	0	0	0	0	1	3600	0	26.8557	25.4567	32.737	5.60233	5.33121	6.09202	2.93238	2.70959	5.71749	2.41404	2.28024	3.89703	7.09555	6.88026	8.52241	1.58189	1.48133	1.63594	28.3498	5.67519	3.78648	2.86377	7.4994	1.56639
15	33	0	1	2	1	1	0	1	1	0	0	2	2750	1	26.5921	25.4801	33.3908	5.53067	5.33445	6.23688	2.89345	2.72702	5.81235	2.38506	2.29089	3.97589	7.01012	6.87568	8.74614	1.56048	1.48174	1.67687	28.4877	5.70067	3.81094	2.88394	7.54398	1.57303
16	33	0	1	2	0	0	0	0	0	0	0	1	3750	0	26.5921	25.4801	32.4735	5.53067	5.33445	6.02375	2.89345	2.72702	5.75123	2.38506	2.29089	3.90748	7.01012	6.87568	8.43055	1.56048	1.48174	1.61389	28.1819	5.62962	3.79057	2.86114	7.43878	1.55204
17	30	0	1	1	0	0	0	0	0	0	0	1	2400	1	26.5694	25.2118	34.4736	5.52255	5.27464	6.43896	2.89426	2.7064	5.99737	2.3802	2.28027	4.10599	7.00742	6.7952	9.04263	1.55695	1.46786	1.73142	28.7516	5.74538	3.86601	2.92215	7.61508	1.58541
18	30	0	1	3	0	0	0	0	1	1	0	1	2400	0	26.5694	25.2118	35.1788	5.52255	5.27464	6.60025	2.89426	2.7064	6.00925	2.3802	2.28027	4.1366	7.00742	6.7952	9.22108	1.55695	1.46786	1.78428	28.9867	5.79914	3.86997	2.93236	7.67457	1.60303
19	28	0	1	1	0	0	1	0	0	0	0	2	3750	1	26.1245	25.5512	33.345	5.44683	5.35912	6.15857	2.83945	2.77481	5.93399	2.34184	2.33084	4.0124	6.88582	6.90524	8.6361	1.53361	1.49025	1.64415	28.3402	5.65484	3.84942	2.89503	7.47572	1.556
20	28	0	1	4	0	0	1	0	0	0	0	1	3850	0	26.1245	25.5512	34.5271	5.44683	5.35912	6.41315	2.83945	2.77481	6.06618	2.34184	2.33084	4.13151	6.88582	6.90524	9.0283	1.53361	1.49025	1.72	28.7343	5.7397	3.89348	2.93473	7.60646	1.58129
21	29	0	3	2	0	0	0	0	0	0	0	1	2900	1	26.1245	25.5512	33.345	5.44683	5.35912	6.15857	2.83945	2.77481	5.93399	2.34184	2.33084	4.0124	6.88582	6.90524	8.6361	1.53361	1.49025	1.64415	28.3402	5.65484	3.84942	2.89503	7.47572	1.556
22	29	0	1	3	0	0	1	0	0	0	0	2	3300	0	26.1245	25.5512	33.1279	5.44683	5.35912	6.1083	2.83945	2.77481	5.93568	2.34184	2.33084	4.0108	6.88582	6.90524	8.57594	1.53361	1.49025	1.6311	28.2678	5.63809	3.84998	2.89449	7.45567	1.55165
23	25	0	1	3	0	0	0	0	0	0	0	1	3200	1	25.9528	25.6539	33.7952	5.42202	5.37749	6.18206	2.79946	2.79722	6.15248	2.31456	2.34683	4.15717	6.84318	6.93245	8.71315	1.52632	1.49568	1.65811	28.4673	5.66052	3.91639	2.93952	7.49626	1.56004
24	25	0	1	3	0	0	1	0	0	0	0	1	3750	0	25.9528	25.6539	33.6803	5.42202	5.37749	6.13992	2.79946	2.79722	6.20025	2.31456	2.34683	4.18912	6.84318	6.93245	8.68992	1.52632	1.49568	1.64966	28.429	5.64648	3.93231	2.95017	7.48852	1.55722
25	26	0	3	1	0	0	0	0	0	1	0	1	2850	1	25.9528	25.6539	33.7952	5.42202	5.37749	6.18206	2.79946	2.79722	6.15248	2.31456	2.34683	4.15717	6.84318	6.93245	8.71315	1.52632	1.49568	1.65811	28.4673	5.66052	3.91639	2.93952	7.49626	1.56004
26	26	1	3	2	0	0	1	0	0	0	0	1	3100	0	25.9528	25.6539	33.183	5.42202	5.37749	6.11989	2.79946	2.79722	5.94279	2.31456	2.34683	4.01235	6.84318	6.93245	8.58049	1.52632	1.49568	1.63057	28.2632	5.6398	3.84649	2.89125	7.45204	1.55086
27	28	0	1	3	0	0	0	0	1	0	0	1	3600	1	25.9639	25.5948	34.0435	5.42003	5.37116	6.18337	2.79938	2.80021	6.30571	2.31183	2.35216	4.24623	6.85113	6.91058	8.76496	1.52339	1.4938	1.66143	28.5341	5.65819	3.96843	2.97007	7.50889	1.55954
28	28	0	3	2	0	0	0	0	0	0	0	2	3200	0	25.9639	25.5948	33.4775	5.42003	5.37116	6.1304	2.79938	2.80021	6.04838	2.31183	2.35216	4.08051	6.85113	6.91058	8.64687	1.52339	1.4938	1.64229	28.3454	5.64053	3.88266	2.91483	7.46953	1.55316
29	32	0	3	1	0	0	0	0	1	1	0	2	3100	1	25.9639	25.5948	33.262	5.42003	5.37116	6.11386	2.79938	2.80021	5.99348	2.31183	2.35216	4.04028	6.85113	6.91058	8.59977	1.52339	1.4938	1.63181	28.2736	5.63501	3.86436	2.90142	7.45383	1.54967
30	32	0	1	4	0	0	1	0	0	0	0	1	3800	0	25.9639	25.5948	33.262	5.42003	5.37116	6.11386	2.79938	2.80021	5.99348	2.31183	2.35216	4.04028	6.85113	6.91058	8.59977	1.52339	1.4938	1.63181	28.2736	5.63501	3.86436	2.90142	7.45383	1.54967
31	29	1	3	3	0	0	0	0	0	0	0	1	3950	1	25.7744	25.7801	33.8974	5.38456	5.4075	6.26166	2.78221	2.83746	6.03024	2.29653	2.3768	4.08673	6.80311	6.96955	8.81925	1.51264	1.50476	1.67396	28.484	5.68457	3.8833	2.92002	7.53064	1.56379
32	29	0	1	1	0	0	1	0	0	0	0	2	3000	0	25.7744	25.7801	33.8974	5.38456	5.4075	6.26166	2.78221	2.83746	6.03024	2.29653	2.3768	4.08673	6.80311	6.96955	8.81925	1.51264	1.50476	1.67396	28.484	5.68457	3.8833	2.92002	7.53064	1.56379
33	30	0	1	3	0	0	0	0	1	0	0	2	2850	1	25.7135	26.1361	33.5676	5.3788	5.473	6.1119	2.77948	2.91027	6.16173	2.29259	2.42491	4.15303	6.79079	7.06613	8.61972	1.51062	1.52338	1.63524	28.4724	5.65457	3.95049	2.95685	7.49221	1.55641
34	30	0	1	2	0	0	1	0	0	0	0	1	3700	0	25.7135	26.1361	32.9097	5.3788	5.473	6.0407	2.77948	2.91027	5.94451	2.29259	2.42491	4.00204	6.79079	7.06613	8.47303	1.51062	1.52338	1.60447	28.2531	5.63083	3.87809	2.90651	7.44332	1.54616
35	28	1	1	3	0	0	1	0	0	0	0	2	3600	1	25.6847	26.3802	33.0474	5.37379	5.51528	6.02974	2.77659	2.97893	6.02203	2.29077	2.46519	4.06097	6.78109	7.12931	8.48834	1.50939	1.53376	1.60909	28.3708	5.6396	3.92585	2.93897	7.46625	1.55074
36	28	0	3	3	0	0	0	0	0	0	0	1	3300	0	25.6847	26.3802	32.9675	5.37379	5.51528	6.01497	2.77659	2.97893	6.00728	2.29077	2.46519	4.04324	6.78109	7.12931	8.46752	1.50939	1.53376	1.60363	28.3441	5.63468	3.92093	2.93307	7.45931	1.54893
37	32	0	1	3	0	0	0	0	0	0	0	2	3500	1	25.6847	26.3802	33.3287	5.37379	5.51528	6.0468	2.77659	2.97893	6.1734	2.29077	2.46519	4.15637	6.78109	7.12931	8.57024	1.50939	1.53376	1.62071	28.4645	5.64529	3.9763	2.97078	7.49355	1.55462
38	32	0	1	3	0	1	0	1	0	0	0	2	3200	0	25.6847	26.3802	32.8789	5.37379	5.51528	6.01518	2.77659	2.97893	5.95402	2.29077	2.46519	4.02043	6.78109	7.12931	8.47675	1.50939	1.53376	1.60685	28.3146	5.63475	3.90318	2.92546	7.46238	1.55
39	30	0	1	3	0	0	1	0	0	0	0	2	2600	1	25.7878	26.3387	33.0276	5.39453	5.50306	6.03654	2.78528	2.98297	5.99697	2.30168	2.46796	4.04124	6.80497	7.12108	8.51309	1.51551	1.53012	1.61188	28.3847	5.64471	3.92174	2.93696	7.47971	1.5525
40	30	0	3	1	0	1	1	1	1	0	0	1	3300	0	25.7878	26.3387	33.505	5.39453	5.50306	6.08339	2.78528	2.98297	6.1928	2.30168	2.46796	4.16504	6.80497	7.12108	8.60655	1.51551	1.53012	1.6281	28.5438	5.66033	3.98702	2.97823	7.51087	1.55791
41	26	0	3	1	1	0	1	0	0	0	0	1	3150	0	25.8817	26.3315	32.9919	5.40861	5.49647	6.04058	2.78049	2.98607	6.01947	2.29309	2.46736	4.04614	6.83018	7.11647	8.49639	1.52057	1.52745	1.60706	28.4017	5.64856	3.92868	2.93553	7.48101	1.5517
42	26	0	3	4	0	0	0	0	0	0	0	1	3800	1	25.8817	26.3315	33.1785	5.40861	5.49647	6.09418	2.78049	2.98607	5.99102	2.29309	2.46736	4.03574	6.83018	7.11647	8.56704	1.52057	1.52745	1.62232	28.4639	5.66642	3.9192	2.93206	7.50457	1.55678
43	27	0	1	3	0	0	1	0	0	0	0	1	3400	1	25.8817	26.3315	33.5763	5.40861	5.49647	6.08628	2.78049	2.98607	6.26184	2.29309	2.46736	4.20801	6.83018	7.11647	8.63101	1.52057	1.52745	1.63099	28.5965	5.66379	4.00947	2.98949	7.52589	1.55967
44	27	0	3	1	0	0	0	0	1	0	0	1	3200	0	25.8817	26.3315	33.1379	5.40861	5.49647	6.05754	2.78049	2.98607	6.0449	2.29309	2.46736	4.07329	6.83018	7.11647	8.54074	1.52057	1.52745	1.61773	28.4504	5.65421	3.93716	2.94458	7.4958	1.55525
45	27	0	1	3	0	0	0	0	0	0	0	2	3300	1	25.7985	26.4154	33.1786	5.38749	5.51431	6.06442	2.74653	2.99949	6.08603	2.26474	2.47382	4.09881	6.80188	7.14098	8.54852	1.51591	1.53004	1.62013	28.4642	5.65541	3.94401	2.94579	7.49713	1.55536
46	27	0	1	2	1	0	0	0	1	0	0	1	2800	0	25.7985	26.4154	33.0312	5.38749	5.51431	6.04732	2.74653	2.99949	6.06081	2.26474	2.47382	4.07165	6.80188	7.14098	8.50366	1.51591	1.53004	1.60935	28.415	5.64971	3.93561	2.93673	7.48217	1.55176
47	30	0	3	3	0	1	1	1	0	0	0	2	3200	1	25.7985	26.4154	33.0559	5.38749	5.51431	6.06031	2.74653	2.99949	6.04492	2.26474	2.47382	4.06073	6.80188	7.14098	8.50574	1.51591	1.53004	1.60946	28.4232	5.65404	3.93031	2.93309	7.48287	1.5518
48	30	0	1	3	0	0	0	0	0	1	0	1	2750	0	25.7985	26.4154	33.898	5.38749	5.51431	6.13004	2.74653	2.99949	6.38768	2.26474	2.47382	4.28884	6.80188	7.14098	8.69265	1.51591	1.53004	1.64387	28.7039	5.67728	4.04456	3.00913	7.54517	1.56327
49	31	0	3	3	0	0	0	0	0	0	0	2	2950	1	25.4361	26.5471	34.9945	5.31779	5.53566	6.27202	2.68243	3.02047	6.7395	2.21182	2.4883	4.5271	6.69173	7.18252	9.05289	1.49802	1.53495	1.70514	28.9925	5.70849	4.14747	3.07574	7.64238	1.57937
50	31	0	3	2	0	0	0	0	0	0	0	2	3050	0	25.4361	26.5471	34.0868	5.31779	5.53566	6.1574	2.68243	3.02047	6.45932	2.21182	2.4883	4.33085	6.69173	7.18252	8.72777	1.49802	1.53495	1.65197	28.69	5.67028	4.05408	3.01032	7.534	1.56165
51	37	0	3	1	0	1	1	0	0	0	0	1	1650	1	25.4361	26.5471	33.2517	5.31779	5.53566	6.0748	2.68243	3.02047	6.12364	2.21182	2.4883	4.1184	6.69173	7.18252	8.55843	1.49802	1.53495	1.62263	28.4116	5.64275	3.94218	2.93951	7.47756	1.55187
52	37	0	1	2	0	1	0	0	1	0	0	1	3700	0	25.4361	26.5471	33.6912	5.31779	5.53566	6.10274	2.68243	3.02047	6.33909	2.21182	2.4883	4.25254	6.69173	7.18252	8.64941	1.49802	1.53495	1.6358	28.5581	5.65206	4.014	2.98422	7.50789	1.55626
53	28	0	3	3	0	0	1	0	0	0	0	1	3500	1	24.5391	26.5994	33.7683	5.13795	5.54019	6.19392	2.52801	3.03329	6.16059	2.08177	2.49689	4.1366	6.43688	7.20486	8.71084	1.44652	1.53619	1.65191	28.3023	5.62402	3.9073	2.90509	7.45086	1.54487
54	28	0	3	2	0	0	0	0	0	0	0	2	2500	0	24.5391	26.5994	33.8438	5.13795	5.54019	6.15851	2.52801	3.03329	6.28489	2.08177	2.49689	4.22193	6.43688	7.20486	8.66977	1.44652	1.53619	1.64609	28.3274	5.61222	3.94873	2.93353	7.43717	1.54293
55	33	0	3	1	0	1	0	1	0	1	0	2	2750	1	23.971	26.6987	33.9158	5.00057	5.56354	6.12645	2.44971	3.05588	6.42698	2.01923	2.51688	4.30087	6.2633	7.24209	8.68616	1.40508	1.54015	1.64425	28.1951	5.56352	3.97752	2.94566	7.39718	1.52983
56	33	0	1	3	0	0	0	0	1	0	0	1	3500	0	23.971	26.6987	33.6556	5.00057	5.56354	6.11668	2.44971	3.05588	6.26774	2.01923	2.51688	4.19115	6.2633	7.24209	8.6105	1.40508	1.54015	1.63372	28.1084	5.56026	3.92445	2.90909	7.37196	1.52631
57	22	0	1	2	0	1	0	1	0	0	0	1	3250	1	23.573	26.8886	34.0736	4.89881	5.59992	6.17852	2.40354	3.08034	6.41411	1.98906	2.53053	4.28617	6.13311	7.31322	8.69972	1.37564	1.55161	1.64858	28.1784	5.55908	3.96599	2.93525	7.38201	1.52528
58	22	0	3	1	1	0	0	0	0	0	0	1	3150	0	23.573	26.8886	37.3559	4.89881	5.59992	6.57522	2.40354	3.08034	7.26262	1.98906	2.53053	4.91414	6.13311	7.31322	9.80947	1.37564	1.55161	1.85202	29.2725	5.69132	4.24883	3.14457	7.75193	1.59309
59	26	0	1	2	0	0	0	0	0	0	0	1	2600	1	23.573	26.8886	34.1164	4.89881	5.59992	6.16506	2.40354	3.08034	6.49182	1.98906	2.53053	4.32994	6.13311	7.31322	8.71411	1.37564	1.55161	1.64733	28.1927	5.5546	3.9919	2.94984	7.38681	1.52486
60	26	0	1	1	0	0	0	0	0	0	0	2	3650	0	23.573	26.8886	34.4716	4.89881	5.59992	6.20156	2.40354	3.08034	6.63221	1.98906	2.53053	4.41981	6.13311	7.31322	8.79059	1.37564	1.55161	1.66089	28.311	5.56676	4.0387	2.9798	7.4123	1.52938
61	30	0	3	3	0	0	1	0	0	1	0	2	2650	1	23.573	26.8886	34.3555	4.89881	5.59992	6.18391	2.40354	3.08034	6.59818	1.98906	2.53053	4.39756	6.13311	7.31322	8.76559	1.37564	1.55161	1.65514	28.2724	5.56088	4.02735	2.97238	7.40397	1.52746
62	30	0	1	1	0	0	1	0	0	0	0	2	3150	0	23.573	26.8886	34.0702	4.89881	5.59992	6.14575	2.40354	3.08034	6.51249	1.98906	2.53053	4.34088	6.13311	7.31322	8.71057	1.37564	1.55161	1.64421	28.1773	5.54816	3.99879	2.95349	7.38563	1.52382
63	29	0	1	2	0	0	0	0	0	0	0	1	2850	1	23.3437	27.2581	34.6922	4.84209	5.65398	6.23885	2.38036	3.12694	6.81107	1.97534	2.55077	4.5415	6.05326	7.44774	8.83392	1.3601	1.57123	1.66723	28.4313	5.5783	4.10612	3.02254	7.44497	1.53285
64	29	0	1	2	0	0	0	0	0	0	0	2	2600	0	23.3437	27.2581	37.2179	4.84209	5.65398	6.54589	2.38036	3.12694	7.34693	1.97534	2.55077	4.97257	6.05326	7.44774	9.72803	1.3601	1.57123	1.83444	29.2732	5.68065	4.28474	3.16622	7.74301	1.58859
65	30	0	1	3	0	0	0	0	0	0	0	2	3450	1	23.3437	27.2581	35.3283	4.84209	5.65398	6.31383	2.38036	3.12694	6.9937	1.97534	2.55077	4.67269	6.05326	7.44774	9.07024	1.3601	1.57123	1.70569	28.6433	5.6033	4.167	3.06627	7.52375	1.54567
66	30	0	3	3	0	1	1	1	0	0	0	1	3250	0	23.3437	27.2581	34.2416	4.84209	5.65398	6.17357	2.38036	3.12694	6.66742	1.97534	2.55077	4.44448	6.05326	7.44774	8.69354	1.3601	1.57123	1.64228	28.2811	5.55654	4.05824	2.99019	7.39818	1.52454
67	29	0	1	3	0	0	1	0	0	0	0	1	3400	0	23.312	27.5644	33.3375	4.82803	5.7076	6.06472	2.36962	3.18431	6.39094	1.96876	2.58464	4.26129	6.04074	7.54064	8.4624	1.35785	1.5881	1.59933	28.0713	5.53345	3.98162	2.93823	7.34793	1.51509
68	29	0	3	3	0	0	0	0	0	0	0	1	2800	1	23.312	27.5644	36.2855	4.82803	5.7076	6.40251	2.36962	3.18431	7.23093	1.96876	2.58464	4.8881	6.04074	7.54064	9.43454	1.35785	1.5881	1.77207	29.0539	5.64605	4.26162	3.14716	7.67197	1.57267
69	29	0	3	3	0	0	0	0	0	0	0	1	3150	1	23.153	27.8399	36.8281	4.78545	5.76816	6.49885	2.33685	3.23722	7.23077	1.9386	2.62124	4.90701	5.98693	7.62494	9.65195	1.34649	1.60468	1.82058	29.2736	5.68415	4.26828	3.15562	7.75461	1.59058
70	29	0	1	2	0	0	0	0	1	0	0	1	3450	0	23.153	27.8399	36.8376	4.78545	5.76816	6.4844	2.33685	3.23722	7.27151	1.9386	2.62124	4.9301	5.98693	7.62494	9.64486	1.34649	1.60468	1.81708	29.2768	5.67934	4.28186	3.16331	7.75224	1.58942
71	29	0	3	2	0	0	1	0	0	0	0	1	3150	1	23.153	27.8399	34.8124	4.78545	5.76816	6.2208	2.33685	3.23722	6.94655	1.9386	2.62124	4.62404	5.98693	7.62494	8.87924	1.34649	1.60468	1.66674	28.6018	5.59147	4.17354	3.06129	7.49704	1.53931
72	29	0	1	2	0	0	1	0	0	0	0	1	3250	0	23.153	27.8399	36.9494	4.78545	5.76816	6.47699	2.33685	3.23722	7.35567	1.9386	2.62124	4.97329	5.98693	7.62494	9.63488	1.34649	1.60468	1.81224	29.3141	5.67687	4.30991	3.17771	7.74892	1.58781
73	31	0	1	3	0	0	1	0	0	0	0	1	3050	1	22.5997	27.9962	34.8172	4.65864	5.79882	6.21192	2.19931	3.2919	6.94612	1.84343	2.66175	4.61418	5.8949	7.6599	8.88532	1.32522	1.60982	1.66758	28.471	5.55646	4.14578	3.03979	7.48004	1.53421
74	31	0	1	2	0	0	0	0	0	0	0	2	3400	0	22.5997	27.9962	33.8464	4.65864	5.79882	6.07391	2.19931	3.2919	6.65428	1.84343	2.66175	4.41789	5.8949	7.6599	8.56118	1.32522	1.60982	1.61188	28.1474	5.51046	4.0485	2.97436	7.37199	1.51564
75	25	0	1	1	0	0	1	0	0	1	0	1	3050	1	22.2499	28.1303	33.8058	4.59848	5.82944	6.04975	2.11546	3.31888	6.67541	1.79659	2.68209	4.42454	5.82873	7.70766	8.52861	1.31097	1.61766	1.60405	28.062	5.49255	4.03658	2.96774	7.355	1.51089
76	25	0	1	2	0	0	0	0	0	0	0	2	3550	0	22.2499	28.1303	36.9496	4.59848	5.82944	6.4971	2.11546	3.31888	7.2738	1.79659	2.68209	4.91531	5.82873	7.70766	9.67456	1.31097	1.61766	1.82601	29.11	5.64167	4.23605	3.13133	7.73698	1.58488
77	32	0	1	1	0	0	0	0	0	0	0	1	3250	1	21.9	28.447	34.5723	4.52796	5.89833	6.12532	2.05495	3.35634	6.98765	1.75655	2.70621	4.62896	5.74027	7.80417	8.77855	1.29388	1.63549	1.64221	28.3064	5.51721	4.13298	3.03058	7.441	1.52386
78	32	0	1	4	0	0	1	0	1	0	0	1	3600	0	21.9	28.447	34.064	4.52796	5.89833	6.05485	2.05495	3.35634	6.84227	1.75655	2.70621	4.53192	5.74027	7.80417	8.59773	1.29388	1.63549	1.61214	28.137	5.49372	4.08452	2.99823	7.38072	1.51384
79	27	0	1	1	0	0	0	0	0	0	0	1	3200	0	21.6729	28.7087	35.8913	4.4713	5.95277	6.24092	2.02451	3.3918	7.31636	1.73398	2.72997	4.91767	5.67694	7.86635	9.29208	1.27838	1.64962	1.73183	28.7576	5.555	4.24422	3.12721	7.61179	1.55328
80	27	0	1	1	0	0	1	0	0	0	0	2	3600	1	21.6729	28.7087	36.2111	4.4713	5.95277	6.29104	2.02451	3.3918	7.3613	1.73398	2.72997	4.95316	5.67694	7.86635	9.40035	1.27838	1.64962	1.75532	28.8642	5.5717	4.2592	3.13904	7.64788	1.56111
81	34	0	1	2	0	0	1	0	1	0	0	1	2250	1	21.6729	28.7087	36.6145	4.4713	5.95277	6.39539	2.02451	3.3918	7.30331	1.73398	2.72997	4.93661	5.67694	7.86635	9.57722	1.27838	1.64962	1.79728	28.9987	5.60649	4.23987	3.13352	7.70684	1.57509
82	34	0	1	3	0	0	0	0	1	0	0	2	2750	0	21.6729	28.7087	36.2111	4.4713	5.95277	6.29104	2.02451	3.3918	7.3613	1.73398	2.72997	4.95316	5.67694	7.86635	9.40035	1.27838	1.64962	1.75532	28.8642	5.5717	4.2592	3.13904	7.64788	1.56111
83	29	0	1	3	0	0	1	0	0	0	0	2	2750	1	21.6861	28.8833	36.7892	4.47131	5.99259	6.42698	2.02474	3.41944	7.3087	1.73254	2.75187	4.93037	5.68195	7.90524	9.64248	1.2778	1.66029	1.80899	29.1195	5.63029	4.25096	3.13826	7.74322	1.58236
84	29	0	1	3	0	0	0	0	0	0	0	2	2950	0	21.6861	28.8833	33.0313	4.47131	5.99259	5.86284	2.02474	3.41944	6.63093	1.73254	2.75187	4.37441	5.68195	7.90524	8.31366	1.2778	1.66029	1.54668	27.8669	5.44225	4.02504	2.95294	7.30028	1.49492
85	31	0	1	3	0	0	1	0	0	0	0	2	2750	1	21.6861	28.8833	34.5918	4.47131	5.99259	6.06675	2.02474	3.41944	7.09892	1.73254	2.75187	4.69917	5.68195	7.90524	8.81983	1.2778	1.66029	1.63411	28.3871	5.51022	4.18103	3.06119	7.46901	1.52407
86	31	0	1	3	0	0	0	0	1	0	0	1	3400	0	21.6861	28.8833	36.6009	4.47131	5.99259	6.35325	2.02474	3.41944	7.38061	1.73254	2.75187	4.97562	5.68195	7.90524	9.57035	1.2778	1.66029	1.78664	29.0568	5.60572	4.27493	3.15334	7.71918	1.57491
87	28	0	1	3	0	0	0	0	0	0	0	2	3000	1	21.7791	28.9292	36.942	4.48753	6.01489	6.34747	2.03474	3.44146	7.58438	1.73781	2.76706	5.08704	5.71546	7.92582	9.59883	1.28446	1.66351	1.78274	29.2168	5.61663	4.35353	3.1973	7.7467	1.5769
88	28	0	3	1	0	0	1	0	0	0	0	2	3100	0	21.7791	28.9292	33.1555	4.48753	6.01489	5.84009	2.03474	3.44146	6.76099	1.73781	2.76706	4.45522	5.71546	7.92582	8.32598	1.28446	1.66351	1.5414	27.9546	5.4475	4.07906	2.98669	7.32242	1.49645
89	25	0	1	3	0	0	1	0	0	0	0	1	3400	1	21.8	29.1218	35.9742	4.48987	6.0578	6.17389	2.03521	3.45804	7.50858	1.73768	2.78134	5.01899	5.72192	7.97727	9.2928	1.28408	1.67712	1.71219	28.9653	5.57385	4.33395	3.17933	7.664	1.55779
90	25	0	1	3	0	0	1	0	0	0	0	1	3650	0	21.8	29.1218	36.7593	4.48987	6.0578	6.35005	2.03521	3.45804	7.4908	1.73768	2.78134	5.03822	5.72192	7.97727	9.59641	1.28408	1.67712	1.78546	29.2271	5.63258	4.32802	3.18574	7.7652	1.58222
91	29	0	3	3	0	0	0	0	0	1	0	1	2950	1	21.8	29.1218	36.3101	4.48987	6.0578	6.22762	2.03521	3.45804	7.55335	1.73768	2.78134	5.05502	5.72192	7.97727	9.4069	1.28408	1.67712	1.73722	29.0773	5.59177	4.34887	3.19135	7.70203	1.56614
92	29	0	1	1	1	0	0	0	0	0	0	1	3100	0	21.8	29.1218	36.3101	4.48987	6.0578	6.22762	2.03521	3.45804	7.55335	1.73768	2.78134	5.05502	5.72192	7.97727	9.4069	1.28408	1.67712	1.73722	29.0773	5.59177	4.34887	3.19135	7.70203	1.56614
93	32	0	1	1	0	0	0	0	0	1	0	1	2800	1	21.8	29.1218	36.8537	4.48987	6.0578	6.3073	2.03521	3.45804	7.63276	1.73768	2.78134	5.11155	5.72192	7.97727	9.56925	1.28408	1.67712	1.77088	29.2585	5.61833	4.37534	3.21019	7.75615	1.57736
94	32	0	3	1	0	0	1	0	1	0	0	2	2900	0	21.8	29.1218	33.9075	4.48987	6.0578	5.92594	2.03521	3.45804	7.05105	1.73768	2.78134	4.63274	5.72192	7.97727	8.52273	1.28408	1.67712	1.57111	28.2764	5.49121	4.18144	3.05059	7.40731	1.51077
95	26	0	1	2	0	1	0	1	0	0	0	2	3400	1	21.7204	29.1596	36.1316	4.46947	6.06328	6.19332	2.02181	3.46106	7.58333	1.72687	2.78511	5.06178	5.69793	7.98031	9.33975	1.27874	1.6796	1.7155	29.0039	5.57536	4.3554	3.19125	7.67266	1.55795
96	26	0	1	3	0	1	0	0	0	0	0	1	3550	0	21.7204	29.1596	36.9108	4.46947	6.06328	6.36975	2.02181	3.46106	7.55786	1.72687	2.78511	5.07697	5.69793	7.98031	9.64246	1.27874	1.6796	1.78936	29.2636	5.63417	4.34691	3.19632	7.77357	1.58257
97	31	0	3	1	0	0	1	0	0	0	0	2	2700	1	21.6224	29.1945	36.7485	4.44264	6.06711	6.39156	2.00904	3.47712	7.3784	1.71817	2.79433	4.95916	5.66439	7.98184	9.64839	1.27007	1.67971	1.79787	29.1885	5.63377	4.28819	3.15722	7.76487	1.58255
98	31	0	1	3	0	0	0	0	0	0	0	1	3750	0	21.6224	29.1945	36.4085	4.44264	6.06711	6.33365	2.00904	3.47712	7.30795	1.71817	2.79433	4.91101	5.66439	7.98184	9.55806	1.27007	1.67971	1.78148	29.0752	5.61447	4.2647	3.14117	7.73476	1.57709
99	34	0	1	3	0	1	1	1	0	0	0	2	4150	1	21.6224	29.1945	36.4085	4.44264	6.06711	6.33365	2.00904	3.47712	7.30795	1.71817	2.79433	4.91101	5.66439	7.98184	9.55806	1.27007	1.67971	1.78148	29.0752	5.61447	4.2647	3.14117	7.73476	1.57709
100	34	0	1	4	0	0	1	0	0	0	0	1	3900	0	21.6224	29.1945	37.3679	4.44264	6.06711	6.38888	2.00904	3.47712	7.78312	1.71817	2.79433	5.20081	5.66439	7.98184	9.72626	1.27007	1.67971	1.79455	29.395	5.63288	4.42309	3.23777	7.79083	1.58144
101	29	0	3	3	0	0	1	0	0	0	0	1	3450	1	21.6024	29.2549	36.8853	4.43749	6.08247	6.30735	2.00776	3.49741	7.75336	1.71512	2.80744	5.17615	5.66429	7.98661	9.59007	1.26826	1.68158	1.7605	29.2475	5.6091	4.41951	3.2329	7.74699	1.57011
102	29	0	1	3	0	0	1	0	1	0	0	1	3400	0	21.6024	29.2549	37.5651	4.43749	6.08247	6.42805	2.00776	3.49741	7.80916	1.71512	2.80744	5.21913	5.66429	7.98661	9.8068	1.26826	1.68158	1.80925	29.4741	5.64934	4.43811	3.24723	7.81923	1.58636
103	30	0	1	2	0	0	0	0	0	1	0	2	3250	0	21.6024	29.2549	37.3001	4.43749	6.08247	6.42734	2.00776	3.49741	7.67046	1.71512	2.80744	5.14783	5.66429	7.98661	9.77042	1.26826	1.68158	1.80851	29.3858	5.6491	4.39188	3.22346	7.80711	1.58612
104	30	0	3	1	0	0	0	0	0	0	0	1	3250	1	21.6024	29.2549	37.2728	4.43749	6.08247	6.41991	2.00776	3.49741	7.65955	1.71512	2.80744	5.14072	5.66429	7.98661	9.76824	1.26826	1.68158	1.80587	29.3767	5.64662	4.38824	3.22109	7.80638	1.58524
105	27	0	3	1	0	0	1	0	0	0	0	1	3150	1	21.7403	29.161	37.353	4.45144	6.07245	6.36577	2.02119	3.51117	7.88487	1.72008	2.8161	5.25749	5.70836	7.9555	9.70989	1.27255	1.67533	1.78003	29.4181	5.62989	4.47241	3.26456	7.79125	1.57597
106	27	0	1	1	0	1	0	1	1	1	1	1	2850	0	21.7403	29.161	36.4237	4.45144	6.07245	6.30645	2.02119	3.51117	7.33815	1.72008	2.8161	4.92289	5.70836	7.9555	9.58238	1.27255	1.67533	1.78434	29.1083	5.61011	4.29017	3.15303	7.74875	1.57741
107	24	0	1	3	0	0	0	0	0	0	0	1	2700	1	21.5719	29.4243	37.1159	4.40171	6.12096	6.41645	1.99484	3.61681	7.47568	1.70269	2.87843	5.01703	5.64659	8.01455	9.77609	1.25714	1.6805	1.8201	29.3707	5.64637	4.36244	3.19939	7.81241	1.58591
108	24	0	3	2	0	0	0	0	0	0	0	2	3300	0	21.5719	29.4243	35.2871	4.40171	6.12096	6.16318	1.99484	3.61681	7.00374	1.70269	2.87843	4.73071	5.64659	8.01455	9.26086	1.25714	1.6805	1.7469	28.7611	5.56195	4.20513	3.10395	7.64067	1.56151
109	32	0	1	1	0	0	0	0	1	0	0	1	3450	1	21.5719	29.4243	37.1159	4.40171	6.12096	6.41645	1.99484	3.61681	7.47568	1.70269	2.87843	5.01703	5.64659	8.01455	9.77609	1.25714	1.6805	1.8201	29.3707	5.64637	4.36244	3.19939	7.81241	1.58591
110	32	0	1	3	0	0	1	0	1	0	0	2	3200	0	21.5719	29.4243	37.9251	4.40171	6.12096	6.4966	1.99484	3.61681	7.81092	1.70269	2.87843	5.23747	5.64659	8.01455	9.95968	1.25714	1.6805	1.84121	29.6404	5.67309	4.47419	3.27287	7.87361	1.59295
111	29	0	1	1	0	0	1	0	0	0	0	2	2950	1	21.4253	29.8214	36.4236	4.36337	6.17482	6.32109	1.98026	3.76785	7.2596	1.69171	2.96203	4.89186	5.60394	8.12338	9.59677	1.24515	1.69054	1.80211	29.2234	5.61976	4.33591	3.18187	7.7747	1.57927
112	29	0	1	1	0	0	0	0	0	0	0	2	3100	0	21.4253	29.8214	37.2093	4.36337	6.17482	6.44562	1.98026	3.76785	7.43747	1.69171	2.96203	5.00877	5.60394	8.12338	9.80244	1.24515	1.69054	1.83439	29.4853	5.66127	4.3952	3.22084	7.84325	1.59003
113	30	0	1	2	0	0	1	0	0	0	0	1	3000	1	21.4253	29.8214	37.9511	4.36337	6.17482	6.45065	1.98026	3.76785	7.88658	1.69171	2.96203	5.27903	5.60394	8.12338	9.90983	1.24515	1.69054	1.83615	29.7326	5.66295	4.5449	3.31092	7.87905	1.59061
114	30	0	1	1	0	0	0	0	0	0	0	2	3350	0	21.4253	29.8214	36.359	4.36337	6.17482	6.30799	1.98026	3.76785	7.25728	1.69171	2.96203	4.8857	5.60394	8.12338	9.57339	1.24515	1.69054	1.79777	29.2019	5.61539	4.33513	3.17982	7.7669	1.57782
115	33	0	1	3	0	0	0	0	0	0	0	1	3600	1	21.3265	30.1259	36.2502	4.34293	6.22428	6.28946	1.97308	3.87297	7.1974	1.68248	3.02489	4.85529	5.5865	8.19092	9.56963	1.23896	1.69905	1.7992	29.2342	5.61889	4.34782	3.18755	7.78235	1.57907
116	33	0	1	1	0	0	1	0	0	0	0	1	3250	0	21.3265	30.1259	36.1868	4.34293	6.22428	6.27659	1.97308	3.87297	7.19579	1.68248	3.02489	4.84949	5.5865	8.19092	9.54629	1.23896	1.69905	1.79485	29.2131	5.6146	4.34728	3.18562	7.77457	1.57762
117	34	0	1	3	0	0	1	0	1	0	0	2	3650	1	21.4628	31.1912	33.8623	4.38457	6.37482	6.01422	2.00842	4.22291	6.47664	1.7004	3.24449	4.42113	5.63986	8.42212	8.92753	1.25209	1.73596	1.70946	28.8388	5.5912	4.23599	3.12201	7.66317	1.56584
118	34	0	3	4	0	0	0	0	0	0	0	2	4600	0	21.4628	31.1912	34.7938	4.38457	6.37482	6.07898	2.00842	4.22291	6.78341	1.7004	3.24449	4.59735	5.63986	8.42212	9.21147	1.25209	1.73596	1.74335	29.1493	5.61279	4.33824	3.18075	7.75782	1.57713
119	25	0	1	3	0	0	0	0	0	0	0	2	3150	1	21.5286	31.258	34.7927	4.41013	6.36344	6.07262	2.02489	4.25781	6.82439	1.71096	3.26185	4.6166	5.67241	8.43248	9.22733	1.25706	1.73772	1.73687	29.1931	5.6154	4.36903	3.19647	7.77741	1.57722
120	25	0	1	3	0	1	1	1	0	0	0	2	3250	0	21.5286	31.258	33.9892	4.41013	6.36344	6.01116	2.02489	4.25781	6.59105	1.71096	3.26185	4.49049	5.67241	8.43248	8.94466	1.25706	1.73772	1.70472	28.9253	5.59491	4.29125	3.15443	7.68318	1.5665
121	26	0	1	1	0	0	0	0	0	0	0	1	3100	1	21.5286	31.258	34.9458	4.41013	6.36344	6.08763	2.02489	4.25781	6.88009	1.71096	3.26185	4.6504	5.67241	8.43248	9.26874	1.25706	1.73772	1.74144	29.2441	5.6204	4.3876	3.20774	7.79121	1.57874
122	26	0	1	3	0	0	1	0	0	0	0	2	3500	0	21.5286	31.258	36.6714	4.41013	6.36344	6.30643	2.02489	4.25781	7.42568	1.71096	3.26185	5.01459	5.67241	8.43248	9.708	1.25706	1.73772	1.80098	29.8194	5.69333	4.56946	3.32913	7.93763	1.59859
123	25	0	3	2	0	0	1	0	0	0	0	1	3300	1	21.6267	31.4588	36.4401	4.43966	6.38357	6.26509	2.04946	4.31076	7.39567	1.72631	3.29629	4.9897	5.71461	8.47913	9.64258	1.26473	1.7456	1.78585	29.8419	5.6961	4.58529	3.33743	7.94544	1.59873
124	25	0	3	3	0	0	1	0	1	0	0	2	2900	0	21.6267	31.4588	34.571	4.43966	6.38357	6.0496	2.04946	4.31076	6.75105	1.72631	3.29629	4.57376	5.71461	8.47913	9.14888	1.26473	1.7456	1.72803	29.2189	5.62428	4.37042	3.19879	7.78087	1.57945
125	26	0	3	2	0	0	1	0	0	0	1	1	3600	1	21.6267	31.4588	33.7923	4.43966	6.38357	5.97802	2.04946	4.31076	6.5601	1.72631	3.29629	4.46669	5.71461	8.47913	8.88893	1.26473	1.7456	1.69273	28.9593	5.60042	4.30677	3.1631	7.69422	1.56768
126	26	0	1	2	0	1	1	0	0	0	0	2	2400	0	21.6267	31.4588	36.4401	4.43966	6.38357	6.26509	2.04946	4.31076	7.39567	1.72631	3.29629	4.9897	5.71461	8.47913	9.64258	1.26473	1.7456	1.78585	29.8419	5.6961	4.58529	3.33743	7.94544	1.59873
127	28	0	1	3	0	0	1	0	0	0	0	1	3200	1	21.7089	32.1022	34.1225	4.47844	6.46308	5.94674	2.08058	4.4794	6.72859	1.75188	3.39759	4.54719	5.74501	8.6348	9.05306	1.27421	1.77113	1.69772	29.3112	5.62942	4.42952	3.23222	7.81096	1.58102
128	28	0	1	1	0	0	1	0	0	0	0	1	3300	0	21.7089	32.1022	32.8026	4.47844	6.46308	5.77306	2.08058	4.4794	6.39869	1.75188	3.39759	4.35611	5.74501	8.6348	8.65027	1.27421	1.77113	1.63744	28.8712	5.57153	4.31956	3.16853	7.67669	1.56093
129	29	0	1	3	0	0	1	0	0	1	0	2	3150	1	21.7281	32.3766	33.921	4.48087	6.52896	5.88638	2.08631	4.50807	6.75227	1.75831	3.41641	4.55742	5.74009	8.72526	8.98929	1.27674	1.78864	1.68036	29.3419	5.63207	4.44888	3.24405	7.81822	1.58191
130	29	0	3	2	0	0	0	0	1	0	0	2	3700	0	21.7281	32.3766	35.5256	4.48087	6.52896	6.13815	2.08631	4.50807	7.12648	1.75831	3.41641	4.80831	5.74009	8.72526	9.42285	1.27674	1.78864	1.74932	29.8768	5.71599	4.57362	3.32768	7.96274	1.6049
131	31	0	3	1	0	0	1	0	0	0	0	1	3300	1	21.7281	32.3766	34.4834	4.48087	6.52896	5.97548	2.08631	4.50807	6.87679	1.75831	3.41641	4.64318	5.74009	8.72526	9.14506	1.27674	1.78864	1.70655	29.5294	5.66177	4.49039	3.27263	7.87014	1.59064
132	31	0	3	3	1	0	0	0	1	0	0	1	2800	0	21.7281	32.3766	34.4356	4.48087	6.52896	5.94949	2.08631	4.50807	6.88641	1.75831	3.41641	4.6442	5.74009	8.72526	9.13245	1.27674	1.78864	1.69965	29.5135	5.65311	4.4936	3.27297	7.86594	1.58834
133	28	0	1	3	0	1	1	1	0	0	0	1	3100	1	21.6448	32.7591	32.6033	4.47072	6.59851	5.77719	2.08625	4.57117	6.31967	1.75971	3.46126	4.30515	5.70768	8.81774	8.60343	1.27474	1.80523	1.63687	29.0024	5.61547	4.3257	3.17538	7.70962	1.57228
134	28	0	1	3	0	0	0	0	0	0	0	1	3650	0	21.6448	32.7591	33.8903	4.47072	6.59851	5.83727	2.08625	4.57117	6.81657	1.75971	3.46126	4.58627	5.70768	8.81774	9.02273	1.27474	1.80523	1.67304	29.4314	5.6355	4.49133	3.26908	7.84938	1.58433
135	25	0	1	3	0	0	0	0	0	0	0	1	2700	1	21.4449	33.0405	32.5965	4.42281	6.64573	5.73233	2.06492	4.63149	6.4283	1.74454	3.4962	4.37053	5.64943	8.88908	8.58793	1.26392	1.81633	1.62575	29.0273	5.60029	4.37491	3.20375	7.70881	1.56867
136	25	0	1	1	0	0	0	0	0	0	0	1	3700	0	21.4449	33.0405	34.3096	4.42281	6.64573	5.90329	2.06492	4.63149	6.9339	1.74454	3.4962	4.6694	5.64943	8.88908	9.13087	1.26392	1.81633	1.6884	29.5983	5.65727	4.54344	3.30338	7.88979	1.58955
137	29	0	1	1	0	0	0	0	0	0	0	2	3100	1	21.3966	33.1921	32.7212	4.41122	6.68171	5.6818	2.06221	4.70061	6.50317	1.74576	3.5317	4.41113	5.62681	8.9311	8.6773	1.2615	1.81918	1.62939	29.1033	5.59158	4.422	3.22953	7.74507	1.57003
138	29	0	3	4	0	0	1	0	0	0	0	2	3200	0	21.3966	33.1921	33.0095	4.41122	6.68171	5.77284	2.06221	4.70061	6.54939	1.74576	3.5317	4.44825	5.62681	8.9311	8.7143	1.2615	1.81918	1.64368	29.1994	5.62192	4.4374	3.24191	7.7574	1.57479
139	32	0	1	2	0	0	0	0	0	0	0	2	3400	0	21.3937	33.0561	34.9701	4.40422	6.65941	5.99503	2.06241	4.69456	7.0716	1.74471	3.52299	4.76122	5.62422	8.89789	9.3446	1.26024	1.81111	1.72898	29.8066	5.68622	4.60952	3.34297	7.95557	1.60011
140	32	0	1	3	0	0	1	0	0	0	0	2	3300	1	21.3937	33.0561	33.4211	4.40422	6.65941	5.87411	2.06241	4.69456	6.56758	1.74471	3.52299	4.46756	5.62422	8.89789	8.83762	1.26024	1.81111	1.67372	29.2903	5.64591	4.44152	3.24509	7.78658	1.58169
141	28	0	1	1	0	0	1	0	0	0	0	2	3300	1	21.3496	32.7021	34.5461	4.38635	6.5918	5.99464	2.04908	4.68876	6.86988	1.73811	3.5098	4.66071	5.60247	8.8026	9.17726	1.25616	1.79089	1.72247	29.5326	5.6576	4.53591	3.30287	7.86078	1.58984
142	28	0	1	1	0	0	0	0	0	0	0	1	2700	0	21.3496	32.7021	33.7584	4.38635	6.5918	5.8615	2.04908	4.68876	6.70496	1.73811	3.5098	4.55092	5.60247	8.8026	8.96716	1.25616	1.79089	1.68394	29.27	5.61322	4.48093	3.26628	7.79074	1.577
143	27	0	1	3	0	0	0	0	0	0	0	1	3650	1	21.4029	32.6228	33.7082	4.39398	6.57689	5.86034	2.06038	4.72573	6.67592	1.74619	3.5254	4.54345	5.62015	8.76879	8.94486	1.261	1.77943	1.68376	29.2446	5.6104	4.48735	3.27168	7.77793	1.57473
144	27	0	1	2	0	0	0	0	0	0	0	1	3750	0	21.4029	32.6228	33.6843	4.39398	6.57689	5.97193	2.06038	4.72573	6.48296	1.74619	3.5254	4.44334	5.62015	8.76879	8.93991	1.261	1.77943	1.71076	29.2367	5.6476	4.42302	3.23831	7.77628	1.58373
145	26	0	1	4	0	0	1	0	0	0	0	2	3300	1	21.4926	32.8122	33.6737	4.42137	6.58419	5.97058	2.0724	4.84092	6.44385	1.75482	3.58087	4.43542	5.65007	8.81998	8.92514	1.26897	1.77647	1.71384	29.3262	5.65871	4.45239	3.25703	7.7984	1.58643
146	26	0	3	3	0	0	0	0	1	0	1	2	3000	0	21.4926	32.8122	33.9719	4.42137	6.58419	5.95328	2.0724	4.84092	6.64678	1.75482	3.58087	4.55178	5.65007	8.81998	8.98253	1.26897	1.77647	1.71156	29.4256	5.65294	4.52004	3.29582	7.81753	1.58567
147	27	0	3	4	0	0	1	0	0	0	0	1	2450	1	21.5956	32.7544	33.9373	4.43804	6.55466	5.92836	2.08649	4.89517	6.64027	1.76543	3.60654	4.55182	5.67505	8.78699	8.99584	1.2719	1.76407	1.71092	29.4291	5.64035	4.54064	3.30793	7.81929	1.5823
148	27	0	3	4	0	1	1	1	0	0	0	1	3000	0	21.5956	32.7544	33.9373	4.43804	6.55466	5.92836	2.08649	4.89517	6.64027	1.76543	3.60654	4.55182	5.67505	8.78699	8.99584	1.2719	1.76407	1.71092	29.4291	5.64035	4.54064	3.30793	7.81929	1.5823
149	29	0	3	1	0	0	1	0	0	0	0	2	2150	1	21.7493	33.0541	32.9323	4.47413	6.55904	5.8841	2.11801	5.05712	6.15246	1.79503	3.69523	4.25887	5.71783	8.85802	8.746	1.27811	1.76668	1.70059	29.2453	5.63909	4.44253	3.24971	7.77395	1.5818
150	29	0	3	2	0	0	1	0	0	0	0	1	3300	0	21.7493	33.0541	34.1386	4.47413	6.55904	6.05217	2.11801	5.05712	6.45088	1.79503	3.69523	4.44532	5.71783	8.85802	9.0586	1.27811	1.76668	1.74859	29.6474	5.69511	4.542	3.31186	7.87815	1.59779
151	33	0	1	3	0	0	0	0	0	0	0	2	2600	1	21.9506	33.0747	33.2217	4.52291	6.53003	5.95124	2.14868	5.09305	6.19854	1.82126	3.70582	4.29544	5.7837	8.86299	8.81776	1.29055	1.76456	1.71406	29.4157	5.66806	4.48009	3.27417	7.82148	1.58972
152	33	0	1	1	0	0	0	0	1	0	0	1	3350	0	21.9506	33.0747	32.5705	4.52291	6.53003	5.84094	2.14868	5.09305	6.06584	1.82126	3.70582	4.20759	5.7837	8.86299	8.63554	1.29055	1.76456	1.68252	29.1986	5.63129	4.43586	3.24489	7.76074	1.57921
153	25	0	3	1	0	1	0	0	0	0	0	1	3900	1	22.0918	33.3548	32.0647	4.55667	6.55389	5.80374	2.17155	5.15609	6.01454	1.8392	3.74086	4.19041	5.83196	8.93732	8.45052	1.29904	1.77674	1.64895	29.1704	5.6381	4.44739	3.25682	7.73993	1.57491
154	25	0	1	1	0	0	0	0	0	0	0	2	3600	0	22.0918	33.3548	32.959	4.55667	6.55389	6.02009	2.17155	5.15609	6.11105	1.8392	3.74086	4.32322	5.83196	8.93732	8.74697	1.29904	1.77674	1.70983	29.4686	5.71022	4.47956	3.30109	7.83875	1.5952
155	36	0	3	1	0	1	1	0	0	0	0	2	3150	1	22.0918	33.3548	33.5634	4.55667	6.55389	5.99426	2.17155	5.15609	6.31958	1.8392	3.74086	4.36607	5.83196	8.93732	8.89609	1.29904	1.77674	1.72002	29.67	5.70161	4.54907	3.31538	7.88845	1.5986
156	36	0	3	3	0	1	1	0	0	0	0	1	3050	0	22.0918	33.3548	33.4302	4.55667	6.55389	5.98815	2.17155	5.15609	6.27796	1.8392	3.74086	4.34631	5.83196	8.93732	8.86688	1.29904	1.77674	1.71643	29.6256	5.69957	4.5352	3.30879	7.87872	1.5974
157	28	0	1	2	0	0	1	0	0	1	0	1	3350	1	22.3899	33.8573	32.4533	4.61219	6.64433	5.81508	2.19597	5.21666	6.17462	1.85532	3.78219	4.27538	5.92384	9.08529	8.58843	1.31412	1.80622	1.66723	29.5668	5.69053	4.52909	3.3043	7.86585	1.59585
158	28	0	1	2	0	0	1	0	0	0	0	1	3650	0	22.3899	33.8573	31.4877	4.61219	6.64433	5.64933	2.19597	5.21666	5.96978	1.85532	3.78219	4.13954	5.92384	9.08529	8.31748	1.31412	1.80622	1.61994	29.245	5.63528	4.4608	3.25902	7.77554	1.58009
159	30	0	1	1	0	0	1	0	0	0	0	2	3000	1	22.3899	33.8573	31.4877	4.61219	6.64433	5.64933	2.19597	5.21666	5.96978	1.85532	3.78219	4.13954	5.92384	9.08529	8.31748	1.31412	1.80622	1.61994	29.245	5.63528	4.4608	3.25902	7.77554	1.58009
160	30	0	1	1	0	0	1	0	1	0	0	1	3300	0	22.3899	33.8573	31.6042	4.61219	6.64433	5.70852	2.19597	5.21666	6.03315	1.85532	3.78219	4.19769	5.92384	9.08529	8.30622	1.31412	1.80622	1.61827	29.2838	5.65501	4.48193	3.2784	7.77178	1.57953
161	33	0	1	3	0	0	1	0	0	1	0	1	3600	1	22.3899	33.8573	32.8121	4.61219	6.64433	5.76797	2.19597	5.21666	6.47242	1.85532	3.78219	4.45126	5.92384	9.08529	8.65819	1.31412	1.80622	1.65255	29.6864	5.67483	4.62835	3.36292	7.8891	1.59096
162	33	0	3	1	0	0	1	0	0	0	0	2	3600	0	22.3899	33.8573	32.963	4.61219	6.64433	5.88886	2.19597	5.21666	6.30556	1.85532	3.78219	4.35855	5.92384	9.08529	8.72016	1.31412	1.80622	1.68466	29.7367	5.71512	4.57273	3.33202	7.90976	1.60166
163	29	0	1	2	0	0	0	0	0	0	0	1	3400	1	22.3761	34.2184	32.3405	4.61535	6.71686	5.76156	2.1974	5.28933	6.19178	1.85606	3.83211	4.27947	5.92106	9.17629	8.56289	1.31417	1.8203	1.66136	29.645	5.69792	4.5595	3.32255	7.88674	1.59861
164	29	0	1	3	0	0	1	0	0	0	0	2	3700	0	22.3761	34.2184	31.3538	4.61535	6.71686	5.59356	2.1974	5.28933	5.98087	1.85606	3.83211	4.1399	5.92106	9.17629	8.28582	1.31417	1.8203	1.61306	29.3161	5.64192	4.4892	3.27602	7.79439	1.58251
165	30	0	1	2	0	0	1	0	1	0	0	2	2550	1	22.3761	34.2184	32.2627	4.61535	6.71686	5.8414	2.1974	5.28933	6.16246	1.85606	3.83211	4.32517	5.92106	9.17629	8.50928	1.31417	1.8203	1.66145	29.6191	5.72454	4.54973	3.33778	7.86887	1.59864
166	30	0	1	3	0	0	1	0	0	0	0	1	3050	0	22.3761	34.2184	32.2627	4.61535	6.71686	5.8414	2.1974	5.28933	6.16246	1.85606	3.83211	4.32517	5.92106	9.17629	8.50928	1.31417	1.8203	1.66145	29.6191	5.72454	4.54973	3.33778	7.86887	1.59864
167	32	0	3	3	0	0	1	0	0	0	0	1	3150	0	22.2118	34.3224	32.3046	4.57739	6.73309	5.85197	2.1674	5.34667	6.13537	1.83422	3.86138	4.31897	5.86016	9.19644	8.54515	1.30534	1.81882	1.67182	29.6129	5.72082	4.54981	3.33819	7.86725	1.59866
168	32	0	1	2	0	0	0	0	1	0	0	1	3000	1	22.2118	34.3224	33.0048	4.57739	6.73309	6.01406	2.1674	5.34667	6.19707	1.83422	3.86138	4.39682	5.86016	9.19644	8.7406	1.30534	1.81882	1.715	29.8463	5.77485	4.57038	3.36414	7.9324	1.61305
169	35	0	3	2	0	1	0	0	0	0	0	2	2800	1	22.2118	34.3224	32.2628	4.57739	6.73309	5.83558	2.1674	5.34667	6.14554	1.83422	3.86138	4.31717	5.86016	9.19644	8.52372	1.30534	1.81882	1.66753	29.599	5.71535	4.5532	3.33759	7.86011	1.59723
170	35	0	1	1	0	1	0	0	0	0	0	1	3300	0	22.2118	34.3224	31.3755	4.57739	6.73309	5.61177	2.1674	5.34667	5.9803	1.83422	3.86138	4.1519	5.86016	9.19644	8.28492	1.30534	1.81882	1.61457	29.3033	5.64075	4.49812	3.2825	7.78051	1.57957
171	24	0	1	1	0	0	1	0	0	0	0	2	3200	1	21.976	34.4949	32.7231	4.52435	6.75639	5.82554	2.11977	5.41692	6.22128	1.79751	3.8951	4.32018	5.78143	9.23036	8.71202	1.29102	1.82071	1.69573	29.7313	5.70209	4.58599	3.3376	7.90794	1.60248
172	24	0	3	3	0	0	1	0	1	0	0	2	2500	0	21.976	34.4949	32.761	4.52435	6.75639	5.99948	2.11977	5.41692	6.063	1.79751	3.8951	4.32675	5.78143	9.23036	8.6899	1.29102	1.82071	1.71101	29.744	5.76007	4.53323	3.33979	7.90056	1.60758
173	29	0	3	3	0	0	1	0	0	0	0	1	2900	1	21.976	34.4949	31.3479	4.52435	6.75639	5.59128	2.11977	5.41692	5.9287	1.79751	3.8951	4.12444	5.78143	9.23036	8.32714	1.29102	1.82071	1.62755	29.2729	5.62401	4.48846	3.27235	7.77964	1.57976
174	29	0	1	3	0	0	1	0	1	0	0	1	4100	0	21.976	34.4949	31.6721	4.52435	6.75639	5.64816	2.11977	5.41692	5.99944	1.79751	3.8951	4.17179	5.78143	9.23036	8.41966	1.29102	1.82071	1.64426	29.381	5.64297	4.51204	3.28813	7.81048	1.58533
175	32	0	1	4	0	0	0	0	0	0	0	1	3800	1	22.053	34.471	32.385	4.5337	6.74692	5.76722	2.11699	5.43035	6.16793	1.79407	3.90417	4.28322	5.80947	9.22089	8.6159	1.29499	1.81799	1.67828	29.6364	5.68261	4.57176	3.32715	7.88209	1.59708
176	32	0	1	1	0	0	0	0	0	0	0	2	2750	0	22.053	34.471	31.3244	4.5337	6.74692	5.60637	2.11699	5.43035	5.96701	1.79407	3.90417	4.15518	5.80947	9.22089	8.28939	1.29499	1.81799	1.61879	29.2828	5.629	4.50478	3.28447	7.77325	1.57725
177	21	0	3	2	1	0	1	0	0	0	0	1	2900	1	22.2179	34.1401	33.126	4.56349	6.67478	6.00677	2.1304	5.44431	6.21168	1.79848	3.90966	4.4139	5.86339	9.09568	8.83888	1.30643	1.78845	1.73284	29.828	5.74835	4.59546	3.37401	7.93265	1.60924
178	21	0	3	2	0	0	1	0	0	0	0	1	3300	0	22.2179	34.1401	33.3499	4.56349	6.67478	6.09307	2.1304	5.44431	6.15397	1.79848	3.90966	4.39211	5.86339	9.09568	8.88184	1.30643	1.78845	1.75052	29.9026	5.77712	4.57623	3.36675	7.94697	1.61513
179	27	0	1	3	0	0	1	0	0	0	0	2	3500	1	22.2179	34.1401	33.126	4.56349	6.67478	6.00677	2.1304	5.44431	6.21168	1.79848	3.90966	4.4139	5.86339	9.09568	8.83888	1.30643	1.78845	1.73284	29.828	5.74835	4.59546	3.37401	7.93265	1.60924
180	27	1	3	1	0	0	1	0	1	0	0	2	3300	0	22.2179	34.1401	32.6886	4.56349	6.67478	5.91867	2.1304	5.44431	6.17731	1.79848	3.90966	4.36696	5.86339	9.09568	8.69379	1.30643	1.78845	1.70626	29.6822	5.71898	4.58401	3.35837	7.88429	1.60038
181	31	0	1	3	0	0	0	0	0	0	0	1	3200	1	22.1847	34.0867	33.008	4.56479	6.64429	5.87736	2.12466	5.47539	6.229	1.79706	3.92251	4.33724	5.84811	9.08965	8.81094	1.30523	1.77991	1.72424	29.7598	5.69548	4.60968	3.35227	7.91623	1.60313
182	31	0	3	2	0	0	0	0	1	0	0	1	2300	0	22.1847	34.0867	33.0291	4.56479	6.64429	6.05664	2.12466	5.47539	6.07491	1.79706	3.92251	4.34997	5.84811	9.08965	8.77905	1.30523	1.77991	1.73602	29.7668	5.75524	4.55832	3.35651	7.9056	1.60705
183	28	0	1	3	0	0	0	0	0	0	0	2	2900	1	22.1001	34.2446	33.2829	4.5499	6.65657	6.09203	2.10854	5.55266	6.11566	1.78916	3.96651	4.35912	5.81186	9.15137	8.78953	1.30022	1.78057	1.74392	29.8758	5.76617	4.59228	3.3716	7.91759	1.60823
184	28	0	1	1	0	0	0	0	0	0	0	1	3100	0	22.1001	34.2446	33.2761	4.5499	6.65657	6.14793	2.10854	5.55266	5.96182	1.78916	3.96651	4.26509	5.81186	9.15137	8.81968	1.30022	1.78057	1.7543	29.8736	5.7848	4.54101	3.34025	7.92764	1.61169
185	23	0	3	3	0	0	1	0	0	0	0	1	3250	1	22.2288	33.6189	34.5966	4.58784	6.48889	6.3509	2.13658	5.56041	6.27382	1.80657	3.9452	4.51935	5.85722	8.94274	9.22379	1.30973	1.72883	1.83805	30.1481	5.80921	4.65694	3.4237	8.00791	1.62554
186	23	0	1	3	0	0	0	0	0	0	0	2	3900	0	22.2288	33.6189	34.0038	4.58784	6.48889	6.17812	2.13658	5.56041	6.32768	1.80657	3.9452	4.50795	5.85722	8.94274	9.04376	1.30973	1.72883	1.79745	29.9505	5.75162	4.67489	3.4199	7.9479	1.612
187	29	0	1	2	0	0	1	0	0	0	0	1	3850	1	22.2288	33.6189	34.1974	4.58784	6.48889	6.23317	2.13658	5.56041	6.30064	1.80657	3.9452	4.51875	5.85722	8.94274	9.13911	1.30973	1.72883	1.8131	30.015	5.76997	4.66588	3.42351	7.97969	1.61722
188	29	0	3	3	0	0	0	0	0	0	0	1	3700	0	22.2288	33.6189	34.3828	4.58784	6.48889	6.32057	2.13658	5.56041	6.24275	1.80657	3.9452	4.50195	5.85722	8.94274	9.15357	1.30973	1.72883	1.82441	30.0768	5.7991	4.64658	3.4179	7.98451	1.62099
189	25	0	1	3	0	0	0	0	0	0	0	2	3600	1	22.1814	33.7301	33.9559	4.58218	6.49002	6.33606	2.13959	5.59684	5.94964	1.80683	3.95916	4.30167	5.85501	8.94813	9.07847	1.30711	1.72807	1.81408	29.9558	5.80275	4.56203	3.35589	7.96054	1.61642
190	25	0	3	3	0	0	1	0	0	0	0	1	2800	0	22.1814	33.7301	34.8146	4.58218	6.49002	6.36917	2.13959	5.59684	6.41919	1.80683	3.95916	4.62369	5.85501	8.94813	9.29472	1.30711	1.72807	1.8459	30.242	5.81379	4.71854	3.46323	8.03262	1.62702
191	30	0	1	3	0	0	0	0	0	0	0	2	2550	1	22.1814	33.7301	33.935	4.58218	6.49002	6.32437	2.13959	5.59684	5.97763	1.80683	3.95916	4.31931	5.85501	8.94813	9.05043	1.30711	1.72807	1.80857	29.9488	5.79886	4.57135	3.36177	7.95119	1.61458
192	30	0	1	2	0	0	0	0	0	1	0	1	3350	0	22.1814	33.7301	34.5325	4.58218	6.49002	6.39174	2.13959	5.59684	6.14732	1.80683	3.95916	4.42727	5.85501	8.94813	9.19986	1.30711	1.72807	1.83312	30.148	5.82131	4.62792	3.39775	8.001	1.62276
193	35	0	1	3	0	1	0	0	0	0	0	2	3200	1	22.4008	33.4792	35.3377	4.64444	6.4115	6.47177	2.18586	5.59826	6.49075	1.84712	3.9364	4.68742	5.9404	8.84275	9.46887	1.3242	1.7025	1.88089	30.4059	5.84257	4.75829	3.49031	8.08401	1.63586
194	35	0	3	1	0	1	0	0	0	0	0	2	3550	0	22.4008	33.4792	34.9966	4.64444	6.4115	6.39628	2.18586	5.59826	6.41634	1.84712	3.9364	4.62643	5.9404	8.84275	9.41088	1.3242	1.7025	1.86737	30.2922	5.81741	4.73349	3.46998	8.06468	1.63136
195	27	0	1	1	0	0	0	0	0	0	0	2	3000	1	22.6159	33.4891	34.6114	4.69226	6.39607	6.32024	2.21978	5.63323	6.38069	1.87608	3.94531	4.58541	6.00774	8.82414	9.29934	1.33396	1.69974	1.85009	30.2388	5.80285	4.74457	3.46893	8.04374	1.62793
196	27	0	3	1	0	0	0	0	0	0	0	1	3250	0	22.6159	33.4891	34.8958	4.69226	6.39607	6.44389	2.21978	5.63323	6.28444	1.87608	3.94531	4.56635	6.00774	8.82414	9.36973	1.33396	1.69974	1.87	30.3336	5.84407	4.71248	3.46258	8.0672	1.63457
197	33	0	3	1	0	0	1	0	1	0	0	2	2900	1	22.764	33.3497	35.5669	4.71977	6.36434	6.5246	2.24126	5.64455	6.49248	1.88948	3.94707	4.70677	6.05829	8.7754	9.5653	1.33985	1.69016	1.9039	30.5602	5.86957	4.79276	3.51444	8.133	1.64463
198	33	0	1	3	0	0	1	0	1	0	0	1	3600	0	22.764	33.3497	35.4763	4.71977	6.36434	6.52515	2.24126	5.64455	6.44227	1.88948	3.94707	4.67451	6.05829	8.7754	9.5469	1.33985	1.69016	1.90505	30.53	5.86975	4.77603	3.50369	8.12686	1.64502
199	26	0	1	1	0	0	1	0	0	0	0	2	3800	1	22.9129	33.3089	34.5526	4.7495	6.34316	6.47351	2.26614	5.67332	5.97277	1.90594	3.96074	4.34744	6.11403	8.75576	9.29453	1.34554	1.6877	1.86172	30.2582	5.85539	4.63741	3.40471	8.05477	1.63165
200	26	0	1	2	0	1	1	1	1	0	0	1	3330	0	22.9129	33.3089	34.7389	4.7495	6.34316	6.46836	2.26614	5.67332	6.07948	1.90594	3.96074	4.41252	6.11403	8.75576	9.31974	1.34554	1.6877	1.86276	30.3203	5.85367	4.67298	3.4264	8.06318	1.632
201	26	0	3	1	0	0	1	0	0	0	0	2	2800	1	22.9129	33.3089	35.2174	4.7495	6.34316	6.5447	2.26614	5.67332	6.18483	1.90594	3.96074	4.48489	6.11403	8.75576	9.44242	1.34554	1.6877	1.88613	30.4797	5.87912	4.7081	3.45052	8.10407	1.63979
202	26	0	1	3	0	0	0	0	0	0	0	1	3300	0	22.9129	33.3089	34.7392	4.7495	6.34316	6.48836	2.26614	5.67332	6.06026	1.90594	3.96074	4.4066	6.11403	8.75576	9.32572	1.34554	1.6877	1.86589	30.3204	5.86034	4.66657	3.42442	8.06517	1.63304
203	21	0	3	3	0	0	0	0	0	0	0	2	3450	1	23.0135	33.3982	34.4464	4.776	6.34146	6.47711	2.29079	5.70802	5.92214	1.92725	3.98373	4.30774	6.15121	8.7727	9.2755	1.35057	1.69366	1.85852	30.286	5.86486	4.64032	3.40624	8.06647	1.63425
204	21	0	1	3	0	0	1	0	0	0	0	1	3250	0	23.0135	33.3982	34.4059	4.776	6.34146	6.48023	2.29079	5.70802	5.88803	1.92725	3.98373	4.28337	6.15121	8.7727	9.26871	1.35057	1.69366	1.8579	30.2725	5.8659	4.62895	3.39812	8.0642	1.63405
205	22	0	3	3	0	0	0	0	0	0	0	1	3150	0	23.2125	33.3759	34.1463	4.82142	6.31304	6.46288	2.32858	5.73633	5.77797	1.96363	3.98536	4.21746	6.21275	8.74327	9.21988	1.36056	1.68816	1.85434	30.2449	5.86578	4.61429	3.38882	8.05864	1.63435
206	22	0	3	4	0	0	0	0	0	0	0	2	2550	1	23.2125	33.3759	33.778	4.82142	6.31304	6.42464	2.32858	5.73633	5.67808	1.96363	3.98536	4.15525	6.21275	8.74327	9.1329	1.36056	1.68816	1.84129	30.1221	5.85303	4.581	3.36808	8.02964	1.63
207	25	0	1	3	0	0	1	0	0	0	0	1	2600	1	23.3935	33.3421	34.402	4.86696	6.28998	6.48818	2.36268	5.76445	5.87252	1.98886	3.99193	4.29357	6.27117	8.71193	9.30276	1.37025	1.68073	1.8674	30.3792	5.88171	4.66655	3.42479	8.09529	1.63946
208	25	1	3	2	0	1	0	1	0	0	0	2	3100	0	23.3935	33.3421	34.388	4.86696	6.28998	6.46539	2.36268	5.76445	5.93033	1.98886	3.99193	4.33339	6.27117	8.71193	9.26745	1.37025	1.68073	1.8596	30.3745	5.87411	4.68582	3.43806	8.08352	1.63686
209	27	0	1	1	0	0	0	0	0	0	0	2	2100	1	23.6106	33.3494	34.3033	4.91896	6.27522	6.48311	2.39842	5.78737	5.82249	2.01711	4.00684	4.25498	6.33862	8.70094	9.28588	1.38179	1.68006	1.86468	30.4211	5.89243	4.66943	3.42631	8.10848	1.64218
210	27	0	3	2	0	0	1	0	0	0	0	2	3000	0	23.6106	33.3494	34.186	4.91896	6.27522	6.46528	2.39842	5.78737	5.77861	2.01711	4.00684	4.22587	6.33862	8.70094	9.25443	1.38179	1.68006	1.85935	30.382	5.88649	4.6548	3.41661	8.098	1.6404
211	27	0	3	1	0	0	1	0	0	1	0	1	3700	1	24.6855	32.9864	34.7501	5.16299	6.12014	6.5242	2.57923	5.84855	5.95946	2.17389	4.00494	4.36249	6.65524	8.55817	9.3831	1.44061	1.64747	1.88368	30.8073	5.93578	4.79575	3.51377	8.19884	1.65725
212	27	0	1	1	0	1	1	1	0	0	0	2	3400	0	24.6855	32.9864	34.1801	5.16299	6.12014	6.46284	2.57923	5.84855	5.79677	2.17389	4.00494	4.2584	6.65524	8.55817	9.24049	1.44061	1.64747	1.86012	30.6173	5.91532	4.74152	3.47908	8.1513	1.6494
213	35	0	1	3	0	1	1	0	0	0	0	2	3300	1	24.6855	32.9864	33.9203	5.16299	6.12014	6.41793	2.57923	5.84855	5.74815	2.17389	4.00494	4.22258	6.65524	8.55817	9.16372	1.44061	1.64747	1.8455	30.5307	5.90035	4.72531	3.46713	8.12571	1.64453
214	35	0	3	1	0	1	1	0	0	0	0	2	3850	0	24.6855	32.9864	34.2463	5.16299	6.12014	6.46349	2.57923	5.84855	5.83232	2.17389	4.00494	4.28181	6.65524	8.55817	9.25799	1.44061	1.64747	1.86167	30.6394	5.91554	4.75337	3.48688	8.15714	1.64992
215	27	0	1	2	0	0	1	0	0	0	0	1	2700	1	24.7887	32.9945	34.1169	5.18436	6.10278	6.48473	2.60946	5.88276	5.69175	2.20325	4.01408	4.19184	6.68477	8.56061	9.2484	1.44578	1.64468	1.86616	30.6333	5.92396	4.72799	3.46972	8.16459	1.65221
216	27	0	3	2	0	0	0	0	0	0	0	1	2950	0	24.7887	32.9945	33.9623	5.18436	6.10278	6.43974	2.60946	5.88276	5.71874	2.20325	4.01408	4.21068	6.68477	8.56061	9.17289	1.44578	1.64468	1.85105	30.5818	5.90896	4.73699	3.476	8.13942	1.64717
217	28	0	1	3	0	0	1	0	0	0	0	1	3250	1	24.7887	32.9945	33.4891	5.18436	6.10278	6.42548	2.60946	5.88276	5.47645	2.20325	4.01408	4.0477	6.68477	8.56061	9.09672	1.44578	1.64468	1.84542	30.4241	5.90421	4.65622	3.42168	8.11403	1.64529
218	28	0	3	4	0	0	0	0	1	1	0	1	3400	0	24.7887	32.9945	34.2266	5.18436	6.10278	6.48581	2.60946	5.88276	5.76722	2.20325	4.01408	4.24666	6.68477	8.56061	9.25091	1.44578	1.64468	1.866	30.6699	5.92432	4.75315	3.488	8.16543	1.65216
219	31	0	1	2	0	0	1	0	1	0	0	2	3250	0	24.7887	32.9945	34.1113	5.18436	6.10278	6.4705	2.60946	5.88276	5.71954	2.20325	4.01408	4.21199	6.68477	8.56061	9.23733	1.44578	1.64468	1.86298	30.6315	5.91921	4.73725	3.47644	8.1609	1.65115
220	31	0	3	2	0	0	1	0	0	0	0	1	3800	1	24.7887	32.9945	34.8239	5.18436	6.10278	6.52161	2.60946	5.88276	6.04787	2.20325	4.01408	4.4236	6.68477	8.56061	9.391	1.44578	1.64468	1.886	30.869	5.93625	4.8467	3.54698	8.21213	1.65882
221	29	0	1	3	0	0	1	0	0	0	0	1	3150	1	25.146	33.165	33.5974	5.27018	6.08552	6.43816	2.66557	5.98998	5.47169	2.2515	4.06904	4.05094	6.78829	8.57027	9.14818	1.466	1.64098	1.85449	30.6361	5.93128	4.70908	3.45716	8.16891	1.65382
222	29	0	3	2	0	0	1	0	1	0	0	2	2800	0	25.146	33.165	34.6444	5.27018	6.08552	6.52669	2.66557	5.98998	5.85921	2.2515	4.06904	4.31346	6.78829	8.57027	9.38355	1.466	1.64098	1.88969	30.9851	5.96079	4.83825	3.54467	8.24737	1.66556
223	25	0	1	1	0	0	1	0	0	0	0	1	3050	1	25.3427	33.2338	33.4748	5.31127	6.08468	6.42413	2.6927	6.04072	5.42443	2.26999	4.09719	4.02491	6.85099	8.5738	9.12859	1.47633	1.64089	1.85137	30.6837	5.94003	4.71928	3.46403	8.18446	1.6562
224	25	0	3	1	0	0	1	0	0	0	0	1	3100	0	25.3427	33.2338	32.4732	5.31127	6.08468	6.32422	2.6927	6.04072	5.10173	2.26999	4.09719	3.81	6.85099	8.5738	8.88326	1.47633	1.64089	1.81469	30.3499	5.90672	4.61172	3.39239	8.10268	1.64397
225	26	0	1	4	0	0	1	0	0	0	0	1	3400	1	25.3427	33.2338	34.1913	5.31127	6.08468	6.47877	2.6927	6.04072	5.71731	2.26999	4.09719	4.22707	6.85099	8.5738	9.28732	1.47633	1.64089	1.87363	30.9226	5.95824	4.81691	3.53142	8.23737	1.66362
226	26	0	1	3	0	0	1	0	0	0	0	1	4400	0	25.3427	33.2338	33.3546	5.31127	6.08468	6.41112	2.6927	6.04072	5.38967	2.26999	4.09719	4.00206	6.85099	8.5738	9.09666	1.47633	1.64089	1.84619	30.6437	5.93569	4.7077	3.45641	8.17381	1.65447
227	28	0	1	3	0	0	0	0	0	0	0	1	3150	1	25.3427	33.2338	33.4748	5.31127	6.08468	6.42413	2.6927	6.04072	5.42443	2.26999	4.09719	4.02491	6.85099	8.5738	9.12859	1.47633	1.64089	1.85137	30.6837	5.94003	4.71928	3.46403	8.18446	1.6562
228	28	0	3	3	0	0	1	0	0	0	0	2	3250	0	25.3427	33.2338	32.6653	5.31127	6.08468	6.36443	2.6927	6.04072	5.17191	2.26999	4.09719	3.8567	6.85099	8.5738	8.94341	1.47633	1.64089	1.82598	30.4139	5.92013	4.63511	3.40796	8.12273	1.64774
229	30	0	1	4	0	0	1	0	0	0	0	1	3150	1	25.3427	33.2338	33.0909	5.31127	6.08468	6.38315	2.6927	6.04072	5.32649	2.26999	4.09719	3.96293	6.85099	8.5738	9.03548	1.47633	1.64089	1.83702	30.5558	5.92637	4.68664	3.44337	8.15342	1.65141
230	30	0	1	3	0	0	0	0	0	0	0	1	2950	0	25.3427	33.2338	32.6653	5.31127	6.08468	6.36443	2.6927	6.04072	5.17191	2.26999	4.09719	3.8567	6.85099	8.5738	8.94341	1.47633	1.64089	1.82598	30.4139	5.92013	4.63511	3.40796	8.12273	1.64774
231	30	0	3	4	0	0	1	0	0	0	0	1	2500	1	25.4567	33.564	33.2201	5.33121	6.13587	6.38303	2.70959	6.16574	5.33705	2.28024	4.17911	3.97253	6.88026	8.68288	9.04199	1.48133	1.65849	1.83548	30.7469	5.95004	4.73746	3.47729	8.20171	1.65843
232	30	0	1	3	0	0	1	0	0	0	0	2	3100	0	25.4567	33.564	32.604	5.33121	6.13587	6.35569	2.70959	6.16574	5.12201	2.28024	4.17911	3.82773	6.88026	8.68288	8.9073	1.48133	1.65849	1.82139	30.5416	5.94092	4.66578	3.42903	8.15681	1.65373
233	31	0	3	1	1	0	0	0	0	0	0	1	2850	1	25.4801	34.0407	31.99	5.33445	6.20252	6.22829	2.72702	6.30731	5.01533	2.29089	4.27181	3.75952	6.87568	8.84822	8.67703	1.48174	1.68488	1.7786	30.5036	5.92175	4.68322	3.44074	8.13364	1.64841
234	31	0	3	1	0	0	0	0	1	0	0	2	2950	0	25.4801	34.0407	32.4297	5.33445	6.20252	6.2987	2.72702	6.30731	5.08882	2.29089	4.27181	3.81493	6.87568	8.84822	8.8062	1.48174	1.68488	1.8017	30.6501	5.94523	4.70772	3.45921	8.1767	1.65611
235	36	0	1	3	1	1	0	0	0	0	0	1	3400	1	25.4801	34.0407	31.879	5.33445	6.20252	6.20922	2.72702	6.30731	4.98638	2.29089	4.27181	3.73594	6.87568	8.84822	8.65433	1.48174	1.68488	1.77437	30.4666	5.9154	4.67357	3.43288	8.12607	1.647
236	36	0	3	2	0	1	1	0	0	0	0	2	2800	0	25.4801	34.0407	32.7852	5.33445	6.20252	6.30058	2.72702	6.30731	5.29151	2.29089	4.27181	3.95431	6.87568	8.84822	8.853	1.48174	1.68488	1.80428	30.7687	5.94585	4.77528	3.50567	8.1923	1.65697
237	23	0	3	3	0	0	1	0	0	0	0	2	3300	1	25.3094	34.3334	32.0892	5.29327	6.23992	6.26983	2.70967	6.39382	4.98631	2.28308	4.33386	3.74062	6.81893	8.94547	8.70158	1.47225	1.69929	1.78747	30.5773	5.93434	4.6966	3.45252	8.15532	1.653
238	23	0	3	2	0	0	1	0	0	1	0	1	3600	0	25.3094	34.3334	32.6544	5.29327	6.23992	6.32126	2.70967	6.39382	5.17933	2.28308	4.33386	3.87155	6.81893	8.94547	8.83352	1.47225	1.69929	1.80519	30.7657	5.95148	4.76094	3.49617	8.1993	1.65891
239	32	0	1	3	0	0	0	0	1	0	0	1	3400	1	25.2118	34.6755	32.1349	5.27464	6.27677	6.28896	2.7064	6.46767	4.99353	2.28027	4.38654	3.73978	6.7952	9.04883	8.68366	1.46786	1.71782	1.78342	30.6741	5.94679	4.72253	3.46887	8.1759	1.65637
240	32	0	1	1	0	0	1	0	1	0	0	1	3700	0	25.2118	34.6755	31.4811	5.27464	6.27677	6.18947	2.7064	6.46767	4.87065	2.28027	4.38654	3.65192	6.7952	9.04883	8.51287	1.46786	1.71782	1.75291	30.4561	5.91363	4.68157	3.43958	8.11897	1.6462
241	26	0	1	1	0	0	0	0	0	0	0	1	1950	1	25.2475	35.1482	31.3819	5.28817	6.33295	6.21682	2.71721	6.58194	4.7939	2.28862	4.46443	3.60344	6.81513	9.18871	8.48439	1.47134	1.74174	1.75199	30.5926	5.94598	4.69768	3.45216	8.16274	1.65502
242	26	0	1	2	0	0	0	0	0	0	0	2	3000	0	25.2475	35.1482	31.3786	5.28817	6.33295	6.23905	2.71721	6.58194	4.76458	2.28862	4.46443	3.58539	6.81513	9.18871	8.49751	1.47134	1.74174	1.75725	30.5914	5.95339	4.68791	3.44615	8.16712	1.65678
243	22	0	1	1	0	0	1	0	0	0	0	2	3100	1	25.3642	35.4069	31.137	5.31786	6.35579	6.19638	2.73577	6.65682	4.72561	2.30321	4.52813	3.54017	6.85604	9.27762	8.38826	1.47969	1.75828	1.73332	30.636	5.95668	4.70607	3.45717	8.17397	1.6571
244	22	0	1	3	0	1	1	0	0	0	0	2	3530	0	25.3642	35.4069	31.6996	5.31786	6.35579	6.24767	2.73577	6.65682	4.90837	2.30321	4.52813	3.66263	6.85604	9.27762	8.50516	1.47969	1.75828	1.74755	30.8236	5.97377	4.76699	3.49799	8.21294	1.66184
245	28	0	1	1	0	0	0	0	0	0	0	1	1700	1	25.3642	35.4069	30.146	5.31786	6.35579	6.05677	2.73577	6.65682	4.39159	2.30321	4.52813	3.32111	6.85604	9.27762	8.14176	1.47969	1.75828	1.69417	30.3057	5.91014	4.59473	3.38415	8.0918	1.64405
246	28	0	1	2	0	0	0	0	0	0	0	1	3600	0	25.3642	35.4069	30.8054	5.31786	6.35579	6.12101	2.73577	6.65682	4.69341	2.30321	4.52813	3.51299	6.85604	9.27762	8.28048	1.47969	1.75828	1.71146	30.5255	5.93155	4.69533	3.44811	8.13805	1.64981
247	28	0	3	4	0	0	0	0	0	0	0	1	2850	1	25.5512	35.8073	30.3442	5.35912	6.39744	6.10735	2.77481	6.75886	4.44162	2.33084	4.60962	3.33956	6.90524	9.40976	8.16337	1.49025	1.77901	1.6998	30.5676	5.95464	4.65843	3.42667	8.15946	1.65635
248	28	0	1	3	0	1	0	1	0	0	0	1	3450	0	25.5512	35.8073	30.4577	5.35912	6.39744	6.13922	2.77481	6.75886	4.52136	2.33084	4.60962	3.38978	6.90524	9.40976	8.20259	1.49025	1.77901	1.7064	30.6054	5.96526	4.68501	3.44341	8.17253	1.65855
249	28	0	1	3	0	0	1	0	0	0	0	1	3050	1	25.5948	36.6452	29.4358	5.37116	6.5053	5.98807	2.80021	6.932	4.25988	2.35216	4.72449	3.21837	6.91058	9.65493	7.89287	1.4938	1.82615	1.64772	30.5586	5.95484	4.66403	3.43167	8.15279	1.65589
250	28	0	3	3	0	0	1	0	0	1	0	1	3550	0	25.5948	36.6452	30.0564	5.37116	6.5053	6.03184	2.80021	6.932	4.5777	2.35216	4.72449	3.42602	6.91058	9.65493	7.99039	1.4938	1.82615	1.65303	30.7655	5.96944	4.76997	3.50089	8.1853	1.65766
251	31	0	3	3	0	0	1	0	1	0	0	2	3200	1	25.5948	36.6452	29.6724	5.37116	6.5053	6.0127	2.80021	6.932	4.40482	2.35216	4.72449	3.30996	6.91058	9.65493	7.93719	1.4938	1.82615	1.6511	30.6375	5.96306	4.71234	3.4622	8.16757	1.65702
252	31	0	1	3	0	0	1	0	1	0	0	1	3250	0	25.5948	36.6452	29.9434	5.37116	6.5053	6.02969	2.80021	6.932	4.48978	2.35216	4.72449	3.3633	6.91058	9.65493	7.97374	1.4938	1.82615	1.65432	30.7278	5.96872	4.74066	3.47998	8.17975	1.65809
253	23	0	3	1	0	0	0	0	0	0	0	1	3450	1	25.7801	36.7061	29.8442	5.4075	6.50341	6.01659	2.83746	6.96183	4.49684	2.3768	4.74057	3.37718	6.96955	9.65759	7.94133	1.50476	1.82673	1.64478	30.7768	5.97583	4.76537	3.49818	8.18949	1.65876
254	23	0	1	2	0	0	0	0	0	0	0	1	3050	0	25.7801	36.7061	29.4693	5.4075	6.50341	5.98964	2.83746	6.96183	4.35268	2.3768	4.74057	3.28172	6.96955	9.65759	7.88425	1.50476	1.82673	1.64183	30.6518	5.96685	4.71732	3.46636	8.17046	1.65777
255	25	0	1	3	0	0	1	0	0	0	0	1	3400	1	25.7801	36.7061	29.2628	5.4075	6.50341	5.94288	2.83746	6.96183	4.32593	2.3768	4.74057	3.26363	6.96955	9.65759	7.81417	1.50476	1.82673	1.62952	30.583	5.95126	4.70841	3.46033	8.1471	1.65367
256	25	0	1	3	0	0	1	0	0	0	0	1	3000	0	25.7801	36.7061	29.0873	5.4075	6.50341	5.93719	2.83746	6.96183	4.14202	2.3768	4.74057	3.14506	6.96955	9.65759	7.80483	1.50476	1.82673	1.63252	30.5245	5.94937	4.6471	3.42081	8.14399	1.65467
257	27	0	1	2	0	0	1	0	0	0	0	2	2800	1	25.7801	36.7061	28.9278	5.4075	6.50341	5.91343	2.83746	6.96183	4.09562	2.3768	4.74057	3.11098	6.96955	9.65759	7.76613	1.50476	1.82673	1.62671	30.4713	5.94145	4.63163	3.40945	8.13109	1.65273
258	27	0	1	3	0	0	1	0	1	0	0	2	3200	0	25.7801	36.7061	29.0982	5.4075	6.50341	5.90758	2.83746	6.96183	4.31388	2.3768	4.74057	3.24971	6.96955	9.65759	7.76417	1.50476	1.82673	1.61761	30.5281	5.9395	4.70439	3.45569	8.13044	1.6497
259	29	0	1	4	0	0	1	0	0	0	0	2	2800	1	26.1361	36.5325	28.9719	5.473	6.47415	5.88152	2.91027	6.92604	4.29859	2.42491	4.71706	3.24064	7.06613	9.61692	7.71821	1.52338	1.81883	1.60902	30.5468	5.94289	4.71163	3.46087	8.13376	1.65041
260	29	0	1	3	1	0	1	0	0	0	0	1	3200	0	26.1361	36.5325	28.9719	5.473	6.47415	5.88152	2.91027	6.92604	4.29859	2.42491	4.71706	3.24064	7.06613	9.61692	7.71821	1.52338	1.81883	1.60902	30.5468	5.94289	4.71163	3.46087	8.13376	1.65041
261	27	0	1	3	0	0	0	0	0	0	0	1	3400	1	26.3387	36.4097	29.3781	5.50306	6.45548	5.96323	2.98297	6.89609	4.35452	2.46796	4.70441	3.27984	7.12108	9.60726	7.8055	1.53012	1.81476	1.6307	30.7088	5.97392	4.74453	3.48407	8.17795	1.65853
262	27	0	1	3	0	0	0	0	0	0	0	2	3300	0	26.3387	36.4097	29.4586	5.50306	6.45548	6.00972	2.98297	6.89609	4.32367	2.46796	4.70441	3.25963	7.12108	9.60726	7.86532	1.53012	1.81476	1.64554	30.7357	5.98942	4.73425	3.47734	8.19789	1.66347
263	27	0	3	1	0	1	1	0	0	0	0	1	3300	1	26.3387	36.4097	29.4963	5.50306	6.45548	5.97875	2.98297	6.89609	4.38293	2.46796	4.70441	3.30003	7.12108	9.60726	7.82921	1.53012	1.81476	1.63366	30.7482	5.9791	4.754	3.4908	8.18585	1.65951
264	27	0	3	3	0	0	0	0	0	0	0	1	3250	0	26.3387	36.4097	29.4586	5.50306	6.45548	6.00972	2.98297	6.89609	4.32367	2.46796	4.70441	3.25963	7.12108	9.60726	7.86532	1.53012	1.81476	1.64554	30.7357	5.98942	4.73425	3.47734	8.19789	1.66347
265	25	0	1	3	0	0	1	0	0	0	0	2	3500	1	26.5994	37.0044	27.7879	5.54019	6.58045	5.71811	3.03329	7.01513	3.93089	2.49689	4.77684	3.02129	7.20486	9.77105	7.42069	1.53619	1.85409	1.56227	30.4639	5.94625	4.65977	3.43167	8.1322	1.65085
266	25	0	3	2	0	0	0	0	0	0	0	2	3000	0	26.5994	37.0044	28.5176	5.54019	6.58045	5.84242	3.03329	7.01513	4.12949	2.49689	4.77684	3.14454	7.20486	9.77105	7.60657	1.53619	1.85409	1.59702	30.7071	5.98769	4.72597	3.47276	8.19416	1.66243
267	30	0	1	2	0	0	0	0	0	0	0	2	3450	1	26.5994	37.0044	28.4406	5.54019	6.58045	5.82523	3.03329	7.01513	4.0417	2.49689	4.77684	3.08698	7.20486	9.77105	7.58928	1.53619	1.85409	1.59569	30.6815	5.98196	4.69671	3.45357	8.1884	1.66199
268	30	0	1	2	0	0	1	0	1	0	0	1	3400	0	26.5994	37.0044	27.0228	5.54019	6.58045	5.54675	3.03329	7.01513	3.81381	2.49689	4.77684	2.92867	7.20486	9.77105	7.20805	1.53619	1.85409	1.51871	30.2089	5.88913	4.62074	3.4008	8.06132	1.63633
269	33	0	1	3	0	0	0	0	1	0	0	1	2800	1	26.6987	36.9849	28.3813	5.56354	6.57793	5.81413	3.05588	7.0007	4.03769	2.51688	4.76035	3.08365	7.24209	9.7677	7.57038	1.54015	1.85574	1.59263	30.6883	5.9852	4.69809	3.45363	8.19339	1.66284
270	33	0	1	3	0	0	0	0	0	0	0	1	3150	0	26.6987	36.9849	27.1546	5.56354	6.57793	5.57877	3.05588	7.0007	3.8459	2.51688	4.76035	2.95538	7.24209	9.7677	7.23653	1.54015	1.85574	1.52543	30.2794	5.90674	4.63416	3.41087	8.0821	1.64044
271	29	0	1	2	0	0	0	0	0	0	0	1	2900	1	26.8616	36.8974	27.3767	5.60069	6.55636	5.62832	3.07746	6.98988	3.89115	2.53198	4.74876	2.99106	7.29957	9.74293	7.29602	1.55166	1.84834	1.53795	30.3786	5.92846	4.65283	3.42393	8.11284	1.64598
272	29	0	1	1	0	1	0	1	0	0	0	2	4250	0	26.8616	36.8974	27.563	5.60069	6.55636	5.66654	3.07746	6.98988	3.92214	2.53198	4.74876	3.01564	7.29957	9.74293	7.34511	1.55166	1.84834	1.54782	30.4407	5.9412	4.66316	3.43213	8.1292	1.64927
273	31	0	1	3	0	0	0	0	0	0	0	1	3800	1	26.8616	36.8974	28.6385	5.60069	6.55636	5.85792	3.07746	6.98988	4.1291	2.53198	4.74876	3.15117	7.29957	9.74293	7.62186	1.55166	1.84834	1.60308	30.7992	6.00499	4.73215	3.47731	8.22145	1.66769
274	31	0	3	3	0	0	1	0	1	0	0	1	2450	0	26.8616	36.8974	27.563	5.60069	6.55636	5.66654	3.07746	6.98988	3.92214	2.53198	4.74876	3.01564	7.29957	9.74293	7.34511	1.55166	1.84834	1.54782	30.4407	5.9412	4.66316	3.43213	8.1292	1.64927
275	24	0	1	3	0	0	0	0	0	0	0	1	2700	1	27.8399	35.9042	29.2817	5.76816	6.36617	6.03498	3.23722	6.93263	4.14286	2.62124	4.70405	3.18863	7.62494	9.43645	7.79982	1.60468	1.78969	1.64524	31.0086	6.05643	4.7709	3.50464	8.28707	1.67987
276	24	0	1	3	0	0	0	0	1	0	0	2	3150	0	27.8399	35.9042	28.3233	5.76816	6.36617	5.86674	3.23722	6.93263	3.98124	2.62124	4.70405	3.08403	7.62494	9.43645	7.55353	1.60468	1.78969	1.59563	30.6891	6.00035	4.71703	3.46977	8.20497	1.66333
277	26	0	3	3	0	0	1	0	0	0	0	2	2900	1	27.8399	35.9042	27.47	5.76816	6.36617	5.67427	3.23722	6.93263	3.85215	2.62124	4.70405	2.98083	7.62494	9.43645	7.31712	1.60468	1.78969	1.5469	30.4047	5.9362	4.674	3.43537	8.12617	1.64709
278	26	0	3	3	0	0	0	0	0	0	0	1	3400	0	27.8399	35.9042	28.6287	5.76816	6.36617	5.92447	3.23722	6.93263	4.01461	2.62124	4.70405	3.10019	7.62494	9.43645	7.63691	1.60468	1.78969	1.61505	30.7909	6.0196	4.72815	3.47516	8.23277	1.66981
279	27	0	3	3	0	0	1	0	1	0	0	1	2600	1	27.9962	35.9261	28.22	5.79882	6.36988	5.84944	3.2919	6.92408	3.95424	2.66175	4.69443	3.06733	7.6599	9.45572	7.51905	1.60982	1.79454	1.58959	30.7141	6.00605	4.72341	3.4745	8.21156	1.66465
280	27	0	1	1	0	0	1	0	0	0	0	1	3350	0	27.9962	35.9261	28.6367	5.79882	6.36988	5.90583	3.2919	6.92408	3.96021	2.66175	4.69443	3.07318	7.6599	9.45572	7.63634	1.60982	1.79454	1.61445	30.853	6.02484	4.7254	3.47645	8.25065	1.67294
281	23	0	3	1	0	0	1	0	0	0	0	2	2600	1	28.1303	35.9168	29.1741	5.82944	6.35746	6.04962	3.31888	6.9421	4.20807	2.68209	4.70308	3.23591	7.70766	9.43544	7.77574	1.61766	1.7911	1.64042	31.0738	6.07884	4.82302	3.54036	8.30628	1.68306
282	23	0	3	3	0	0	0	0	0	0	0	1	3450	0	28.1303	35.9168	28.1238	5.82944	6.35746	5.8403	3.31888	6.9421	3.9167	2.68209	4.70308	3.04549	7.70766	9.43544	7.50175	1.61766	1.7911	1.58653	30.7236	6.00907	4.72589	3.47688	8.21495	1.6651
283	27	0	1	3	0	0	1	0	0	0	0	1	2750	1	28.1303	35.9168	27.3939	5.82944	6.35746	5.68225	3.31888	6.9421	3.80497	2.68209	4.70308	2.95827	7.70766	9.43544	7.29762	1.61766	1.7911	1.54535	30.4803	5.95638	4.68865	3.44781	8.14691	1.65137
284	27	0	3	1	0	0	1	0	0	1	0	1	3300	0	28.1303	35.9168	28.5383	5.82944	6.35746	5.8947	3.31888	6.9421	3.90984	2.68209	4.70308	3.04137	7.70766	9.43544	7.61499	1.61766	1.7911	1.61068	30.8618	6.0272	4.7236	3.47551	8.2527	1.67315
285	29	0	1	3	0	1	1	0	0	0	0	1	3300	1	28.1303	35.9168	27.3939	5.82944	6.35746	5.68225	3.31888	6.9421	3.80497	2.68209	4.70308	2.95827	7.70766	9.43544	7.29762	1.61766	1.7911	1.54535	30.4803	5.95638	4.68865	3.44781	8.14691	1.65137
286	29	0	1	2	0	1	1	0	0	0	0	1	3000	0	28.1303	35.9168	28.251	5.82944	6.35746	5.84079	3.31888	6.9421	3.96957	2.68209	4.70308	3.07261	7.70766	9.43544	7.54541	1.61766	1.7911	1.59137	30.766	6.00923	4.74351	3.48592	8.2295	1.66671
287	34	0	1	1	0	0	1	0	0	0	0	2	3000	1	28.1303	35.9168	27.8304	5.82944	6.35746	5.77575	3.31888	6.9421	3.87272	2.68209	4.70308	3.01153	7.70766	9.43544	7.42027	1.61766	1.7911	1.56975	30.6258	5.98755	4.71123	3.46557	8.18779	1.6595
288	34	1	1	3	0	0	1	0	1	0	0	2	3650	0	28.1303	35.9168	29.0117	5.82944	6.35746	6.0032	3.31888	6.9421	4.13943	2.68209	4.70308	3.18962	7.70766	9.43544	7.72711	1.61766	1.7911	1.63029	31.0196	6.06336	4.80013	3.52493	8.29007	1.67968
289	23	0	1	1	0	0	0	0	0	0	0	2	3000	1	28.447	35.7141	28.4711	5.89833	6.2988	5.90009	3.35634	6.95593	3.97001	2.70621	4.70475	3.08674	7.80417	9.36317	7.62431	1.63549	1.77493	1.60766	30.8774	6.03241	4.76076	3.49924	8.26388	1.67269
290	23	0	1	3	0	0	0	0	0	0	0	1	3050	0	28.447	35.7141	28.0879	5.89833	6.2988	5.84841	3.35634	6.95593	3.87637	2.70621	4.70475	3.02853	7.80417	9.36317	7.50038	1.63549	1.77493	1.58849	30.7497	6.01518	4.72955	3.47983	8.22257	1.6663
291	25	0	3	1	0	0	1	0	0	0	0	1	3700	1	28.447	35.7141	28.3186	5.89833	6.2988	5.9002	3.35634	6.95593	3.89569	2.70621	4.70475	3.04246	7.80417	9.36317	7.56968	1.63549	1.77493	1.60502	30.8265	6.03245	4.73599	3.48448	8.24568	1.67181
292	25	0	1	4	0	0	0	0	0	1	0	1	3350	0	28.447	35.7141	28.677	5.89833	6.2988	5.95501	3.35634	6.95593	3.94345	2.70621	4.70475	3.06343	7.80417	9.36317	7.65717	1.63549	1.77493	1.62256	30.946	6.05071	4.75191	3.49147	8.27484	1.67766
293	28	0	3	1	0	0	1	0	1	0	0	1	2950	0	28.447	35.7141	27.5834	5.89833	6.2988	5.73944	3.35634	6.95593	3.79937	2.70621	4.70475	2.96758	7.80417	9.36317	7.36298	1.63549	1.77493	1.56032	30.5815	5.97886	4.70388	3.45951	8.17678	1.65691
294	28	0	1	2	0	0	1	0	1	0	0	1	2100	1	28.447	35.7141	28.6701	5.89833	6.2988	5.94925	3.35634	6.95593	3.95784	2.70621	4.70475	3.07866	7.80417	9.36317	7.68358	1.63549	1.77493	1.62145	30.9437	6.04879	4.7567	3.49654	8.28364	1.67729
295	31	0	1	2	0	0	0	0	0	0	0	2	3050	1	28.7087	35.4263	27.5035	5.95277	6.23595	5.72303	3.3918	6.92974	3.78153	2.72997	4.68562	2.95569	7.86635	9.29472	7.33258	1.64962	1.75827	1.55586	30.5462	5.97058	4.70102	3.4571	8.16455	1.65458
296	31	0	1	4	0	0	0	0	1	0	0	2	2550	0	28.7087	35.4263	28.5588	5.95277	6.23595	5.9533	3.3918	6.92974	3.93931	2.72997	4.68562	3.0793	7.86635	9.29472	7.62849	1.64962	1.75827	1.61589	30.8979	6.04734	4.75362	3.4983	8.26319	1.6746
297	28	0	1	3	0	0	0	0	0	0	0	2	3000	1	28.8129	35.2091	27.7406	5.9815	6.18773	5.76951	3.41964	6.89796	3.8289	2.75132	4.65894	2.99196	7.89141	9.23717	7.39859	1.65687	1.7445	1.56729	30.5875	5.97958	4.7155	3.46741	8.17572	1.65622
298	28	0	1	1	0	0	0	0	1	0	0	1	3500	0	28.8129	35.2091	28.8976	5.9815	6.18773	5.98169	3.41964	6.89796	3.93581	2.75132	4.65894	3.07502	7.89141	9.23717	7.71891	1.65687	1.7445	1.6331	30.9732	6.05031	4.75114	3.49509	8.2825	1.67816
299	32	0	1	1	0	1	0	1	0	0	0	1	3400	1	28.8129	35.2091	27.7489	5.9815	6.18773	5.75387	3.41964	6.89796	3.82743	2.75132	4.65894	2.98298	7.89141	9.23717	7.4268	1.65687	1.7445	1.57022	30.5903	5.97437	4.71501	3.46442	8.18513	1.6572
300	32	0	3	3	0	0	1	0	1	0	0	2	2900	0	28.8129	35.2091	28.2091	5.9815	6.18773	5.87022	3.41964	6.89796	3.90084	2.75132	4.65894	3.04892	7.89141	9.23717	7.53035	1.65687	1.7445	1.59355	30.7437	6.01315	4.73948	3.48639	8.21964	1.66497
301	34	0	1	3	0	0	0	0	0	0	0	1	2700	1	28.8129	35.2091	29.2699	5.9815	6.18773	6.07446	3.41964	6.89796	4.05204	2.75132	4.65894	3.14824	7.89141	9.23717	7.81519	1.65687	1.7445	1.65251	31.0973	6.08123	4.78988	3.5195	8.31459	1.68463
302	34	0	3	1	0	0	0	0	0	0	0	1	2950	0	28.8129	35.2091	28.2091	5.9815	6.18773	5.87022	3.41964	6.89796	3.90084	2.75132	4.65894	3.04892	7.89141	9.23717	7.53035	1.65687	1.7445	1.59355	30.7437	6.01315	4.73948	3.48639	8.21964	1.66497
303	31	0	1	2	0	0	1	0	0	0	0	2	3800	1	28.9292	35.1825	29.1117	6.01489	6.17911	6.04322	3.44146	6.88845	4.03344	2.76706	4.6568	3.12663	7.92582	9.21048	7.79534	1.66351	1.74389	1.64308	31.0745	6.07907	4.78779	3.51683	8.31055	1.68349
304	31	0	3	1	0	1	1	1	0	0	0	2	3400	0	28.9292	35.1825	29.2062	6.01489	6.17911	6.05906	3.44146	6.88845	4.06232	2.76706	4.6568	3.14867	7.92582	9.21048	7.81949	1.66351	1.74389	1.64644	31.106	6.08435	4.79741	3.52418	8.3186	1.68461
305	29	0	1	1	0	0	0	0	0	0	0	2	3000	1	29.1218	34.9099	28.6145	6.0578	6.12186	5.95349	3.45804	6.86505	3.98685	2.78134	4.64004	3.10497	7.97727	9.13014	7.66921	1.67712	1.72783	1.61244	30.8821	6.04438	4.76998	3.50878	8.25888	1.67246
306	29	0	3	1	0	1	1	0	1	1	0	1	3090	0	29.1218	34.9099	28.2906	6.0578	6.12186	5.88217	3.45804	6.86505	3.93836	2.78134	4.64004	3.06746	7.97727	9.13014	7.57887	1.67712	1.72783	1.59395	30.7741	6.02061	4.75382	3.49628	8.22876	1.6663
307	35	0	3	3	0	1	1	0	0	0	0	1	3200	1	29.1218	34.9099	28.9755	6.0578	6.12186	5.99921	3.45804	6.86505	4.07668	2.78134	4.64004	3.16014	7.97727	9.13014	7.78612	1.67712	1.72783	1.63071	31.0024	6.05962	4.79992	3.52717	8.29784	1.67855
308	35	0	1	3	0	1	0	0	1	0	0	1	3100	0	29.1218	34.9099	27.6573	6.0578	6.12186	5.73652	3.45804	6.86505	3.84405	2.78134	4.64004	2.98995	7.97727	9.13014	7.40223	1.67712	1.72783	1.55778	30.563	5.97206	4.72238	3.47044	8.16988	1.65424
309	36	0	1	3	0	1	0	0	0	0	0	1	3100	1	29.1218	34.9099	27.8076	6.0578	6.12186	5.77849	3.45804	6.86505	3.86354	2.78134	4.64004	3.00852	7.97727	9.13014	7.44236	1.67712	1.72783	1.56699	30.6131	5.98605	4.72888	3.47663	8.18326	1.65731
310	36	0	3	3	0	1	1	1	1	0	0	2	3450	0	29.1218	34.9099	29.0098	6.0578	6.12186	5.99983	3.45804	6.86505	3.98871	2.78134	4.64004	3.10599	7.97727	9.13014	7.77496	1.67712	1.72783	1.63613	31.0139	6.05983	4.7706	3.50912	8.29413	1.68036
311	27	0	1	1	0	1	1	1	0	0	0	1	2300	1	29.1945	34.7669	29.0691	6.06711	6.10429	6.01754	3.47712	6.88234	4.05732	2.79433	4.65336	3.14213	7.98184	9.09804	7.81501	1.67971	1.71714	1.64029	31.0102	6.06298	4.8056	3.52994	8.2983	1.67905
312	27	0	1	1	0	0	1	0	0	0	0	1	3300	0	29.1945	34.7669	28.1525	6.06711	6.10429	5.84903	3.47712	6.88234	3.87849	2.79433	4.65336	3.01825	7.98184	9.09804	7.55136	1.67971	1.71714	1.59127	30.7046	6.00681	4.74599	3.48865	8.21041	1.66271
313	27	1	1	3	0	0	1	0	0	0	0	2	3250	1	29.1945	34.7669	28.1504	6.06711	6.10429	5.83048	3.47712	6.88234	3.87564	2.79433	4.65336	3.00811	7.98184	9.09804	7.57703	1.67971	1.71714	1.59373	30.7039	6.00063	4.74504	3.48526	8.21897	1.66353
314	27	0	3	1	0	0	1	0	0	0	0	2	3350	0	29.1945	34.7669	29.5276	6.06711	6.10429	6.12095	3.47712	6.88234	4.07994	2.79433	4.65336	3.1623	7.98184	9.09804	7.95594	1.67971	1.71714	1.6692	31.163	6.09745	4.81313	3.53666	8.34527	1.68868
315	29	0	1	1	0	0	1	0	0	0	0	2	2850	1	29.1945	34.7669	29.3463	6.06711	6.10429	6.06805	3.47712	6.88234	4.00506	2.79433	4.65336	3.11701	7.98184	9.09804	7.88016	1.67971	1.71714	1.65945	31.1026	6.07982	4.78817	3.52157	8.32001	1.68543
316	29	0	2	3	0	0	1	0	1	0	0	1	4000	0	29.1945	34.7669	28.4189	6.06711	6.10429	5.90749	3.47712	6.88234	3.91799	2.79433	4.65336	3.04859	7.98184	9.09804	7.63072	1.67971	1.71714	1.60678	30.7934	6.0263	4.75915	3.49876	8.23687	1.66788
317	32	0	1	4	0	0	1	0	0	0	0	1	3450	1	29.2549	34.5594	29.7771	6.08247	6.05954	6.16188	3.49741	6.84976	4.09754	2.80744	4.62952	3.18128	7.98661	9.05469	8.01042	1.68158	1.70703	1.68247	31.1971	6.1013	4.8149	3.53941	8.35057	1.69036
318	32	0	1	1	0	0	1	0	0	0	0	1	3100	0	29.2549	34.5594	29.0107	6.08247	6.05954	6.03333	3.49741	6.84976	4.00673	2.80744	4.62952	3.11913	7.98661	9.05469	7.78894	1.68158	1.70703	1.63988	30.9417	6.05844	4.78463	3.5187	8.27675	1.67617
319	25	0	1	3	0	0	1	0	0	0	0	1	2900	1	29.0961	34.6198	29.4136	6.05611	6.07262	6.09083	3.49306	6.87055	3.95964	2.80293	4.64512	3.09265	7.93113	9.0646	7.91671	1.67127	1.70781	1.6701	31.0432	6.07319	4.77442	3.51357	8.30415	1.68306
320	25	0	3	2	0	0	0	0	0	0	0	1	3400	0	29.0961	34.6198	29.926	6.05611	6.07262	6.22202	3.49306	6.87055	4.09175	2.80293	4.64512	3.17827	7.93113	9.0646	8.06567	1.67127	1.70781	1.70132	31.214	6.11692	4.81845	3.54211	8.3538	1.69347
321	28	0	1	2	0	0	1	0	0	0	0	1	2500	1	29.0961	34.6198	28.604	6.05611	6.07262	5.94464	3.49306	6.87055	3.91538	2.80293	4.64512	3.05088	7.93113	9.0646	7.69207	1.67127	1.70781	1.623	30.7733	6.02446	4.75967	3.49965	8.22927	1.66736
322	28	0	1	3	0	0	0	0	0	0	0	1	3150	0	29.0961	34.6198	29.7322	6.05611	6.07262	6.20041	3.49306	6.87055	4.06296	2.80293	4.64512	3.16965	7.93113	9.0646	8.02315	1.67127	1.70781	1.69262	31.1494	6.10971	4.80886	3.53923	8.33963	1.69057
323	30	0	1	3	0	0	1	0	0	1	0	1	3400	1	29.0961	34.6198	29.8146	6.05611	6.07262	6.16888	3.49306	6.87055	4.06446	2.80293	4.64512	3.16453	7.93113	9.0646	8.02872	1.67127	1.70781	1.69177	31.1768	6.0992	4.80936	3.53753	8.34148	1.69028
324	30	0	3	3	0	0	1	0	1	0	0	1	3200	0	29.0961	34.6198	29.7403	6.05611	6.07262	6.15099	3.49306	6.87055	4.01957	2.80293	4.64512	3.13283	7.93113	9.0646	8.00004	1.67127	1.70781	1.68682	31.1521	6.09324	4.7944	3.52696	8.33192	1.68863
325	21	0	3	1	0	0	0	0	0	0	0	1	2500	1	29.161	34.7413	29.2819	6.07245	6.09598	6.08444	3.51117	6.92081	3.88129	2.8161	4.67946	3.04255	7.9555	9.07415	7.92061	1.67533	1.71066	1.6769	31.0614	6.08429	4.77109	3.5127	8.31675	1.68763
326	21	0	1	3	0	0	1	0	0	0	0	1	2900	0	29.161	34.7413	29.4281	6.07245	6.09598	6.10446	3.51117	6.92081	3.91106	2.8161	4.67946	3.06271	7.9555	9.07415	7.9516	1.67533	1.71066	1.68023	31.1101	6.09096	4.78101	3.51942	8.32708	1.68874
327	28	0	1	2	0	0	1	0	0	0	0	1	3450	1	29.161	34.7413	29.6595	6.07245	6.09598	6.13644	3.51117	6.92081	3.98355	2.8161	4.67946	3.11051	7.9555	9.07415	8.00289	1.67533	1.71066	1.68777	31.1873	6.10163	4.80517	3.53536	8.34418	1.69125
328	28	0	1	3	0	0	1	0	0	0	0	2	3150	0	29.161	34.7413	29.3964	6.07245	6.09598	6.08943	3.51117	6.92081	4.03619	2.8161	4.67946	3.13612	7.9555	9.07415	7.94505	1.67533	1.71066	1.67013	31.0996	6.08596	4.82272	3.54389	8.3249	1.68537
329	30	0	1	2	0	0	0	0	0	0	0	1	3000	1	29.161	34.7413	29.2856	6.07245	6.09598	6.05805	3.51117	6.92081	3.89957	2.8161	4.67946	3.04717	7.9555	9.07415	7.89745	1.67533	1.71066	1.66649	31.0626	6.07549	4.77718	3.51424	8.30903	1.68416
330	30	0	1	3	0	0	1	0	0	0	0	2	2900	0	29.161	34.7413	29.8601	6.07245	6.09598	6.19407	3.51117	6.92081	4.06051	2.8161	4.67946	3.15731	7.9555	9.07415	8.08641	1.67533	1.71066	1.699	31.2541	6.12084	4.83083	3.55096	8.37202	1.695
331	25	0	1	2	0	0	0	0	0	0	0	1	3800	1	29.2882	35.0748	29.0382	6.09397	6.16382	6.03112	3.54816	6.96963	3.84027	2.83838	4.71037	3.02053	7.98508	9.16729	7.8533	1.67929	1.73231	1.65837	31.1337	6.0963	4.78602	3.52309	8.33523	1.68999
332	25	1	3	3	0	0	1	0	0	0	0	1	2950	0	29.2882	35.0748	28.8844	6.09397	6.16382	5.98236	3.54816	6.96963	3.82691	2.83838	4.71037	3.00376	7.98508	9.16729	7.7961	1.67929	1.73231	1.64392	31.0825	6.08005	4.78157	3.51751	8.31616	1.68517
333	32	0	3	1	0	0	1	0	0	1	0	2	3050	1	29.2882	35.0748	29.4347	6.09397	6.16382	6.1142	3.54816	6.96963	3.98423	2.83838	4.71037	3.11193	7.98508	9.16729	7.97953	1.67929	1.73231	1.67508	31.2659	6.12399	4.83401	3.55356	8.3773	1.69556
334	32	0	1	2	0	0	0	0	1	1	0	2	3550	0	29.2882	35.0748	28.8596	6.09397	6.16382	6.01896	3.54816	6.96963	3.89293	2.83838	4.71037	3.05804	7.98508	9.16729	7.80601	1.67929	1.73231	1.64391	31.0742	6.09225	4.80357	3.5356	8.31946	1.68517
335	29	0	3	3	0	0	0	0	0	0	0	2	2800	1	29.8214	34.9113	28.7119	6.17482	6.16745	5.97329	3.76785	6.81257	3.79265	2.96203	4.62716	2.99113	8.12338	9.14123	7.77153	1.69054	1.74438	1.6428	31.1482	6.10519	4.79102	3.52677	8.34538	1.69257
336	29	0	3	3	0	0	1	0	0	0	0	2	3150	0	29.8214	34.9113	28.9304	6.17482	6.16745	5.9898	3.76785	6.81257	3.84444	2.96203	4.62716	3.02244	8.12338	9.14123	7.80529	1.69054	1.74438	1.64368	31.2211	6.11069	4.80829	3.53721	8.35663	1.69287
337	28	0	1	2	0	0	0	0	0	0	0	2	2800	1	30.2831	34.5184	28.9635	6.25021	6.11501	6.01228	3.93746	6.64308	3.8623	3.06863	4.52262	3.04093	8.21956	9.07246	7.82649	1.70213	1.73828	1.65014	31.255	6.12583	4.81428	3.54406	8.37283	1.69685
338	28	0	1	2	0	0	1	0	0	0	0	1	3150	0	30.2831	34.5184	28.7999	6.25021	6.11501	5.96053	3.93746	6.64308	3.84882	3.06863	4.52262	3.02383	8.21956	9.07246	7.76566	1.70213	1.73828	1.63474	31.2005	6.10858	4.80978	3.53836	8.35256	1.69172
339	37	0	1	3	0	1	0	0	0	0	0	2	2750	1	30.2831	34.5184	28.9152	6.25021	6.11501	6.00747	3.93746	6.64308	3.85329	3.06863	4.52262	3.03662	8.21956	9.07246	7.81742	1.70213	1.73828	1.6487	31.2389	6.12423	4.81127	3.54262	8.36981	1.69637
340	37	0	3	1	0	1	0	0	0	0	0	1	3000	0	30.2831	34.5184	28.5014	6.25021	6.11501	5.92784	3.93746	6.64308	3.77251	3.06863	4.52262	2.97689	8.21956	9.07246	7.7034	1.70213	1.73828	1.63074	31.101	6.09769	4.78435	3.52271	8.3318	1.69038
341	26	0	3	1	0	0	0	0	0	0	0	1	3100	1	30.5964	34.1961	28.3138	6.29766	6.06945	5.87893	4.03751	6.55077	3.72933	3.12776	4.47165	2.94275	8.28732	9.0087	7.63477	1.71203	1.72804	1.61854	31.0354	6.08201	4.77254	3.51405	8.31027	1.6862
342	26	0	1	3	0	0	0	0	0	1	0	1	3800	0	30.5964	34.1961	29.0317	6.29766	6.06945	6.01831	4.03751	6.55077	3.87071	3.12776	4.47165	3.04292	8.28732	9.0087	7.84068	1.71203	1.72804	1.65267	31.2747	6.12847	4.81966	3.54744	8.3789	1.69758
343	29	0	1	3	0	0	0	0	0	0	0	2	2850	1	30.8472	33.8717	28.9764	6.33267	6.02901	5.98147	4.12921	6.45147	3.88037	3.1859	4.4113	3.04027	8.33882	8.93705	7.80515	1.71994	1.7197	1.63713	31.2318	6.11438	4.82035	3.54582	8.36034	1.69226
344	29	0	3	3	0	0	0	0	0	0	0	2	3600	0	30.8472	33.8717	29.088	6.33267	6.02901	6.0288	4.12921	6.45147	3.88375	3.1859	4.4113	3.05277	8.33882	8.93705	7.85672	1.71994	1.7197	1.65135	31.269	6.13016	4.82148	3.54999	8.37753	1.697
345	33	0	1	2	0	0	0	0	0	0	0	2	2850	1	31.1912	33.349	29.9077	6.37482	5.95031	6.19227	4.22291	6.33948	4.10455	3.24449	4.34051	3.19846	8.42212	8.79981	8.09594	1.73596	1.69297	1.68844	31.4826	6.17247	4.88898	3.59449	8.43929	1.70579
346	33	0	3	2	0	0	1	0	1	0	0	1	4100	0	31.1912	33.349	29.2649	6.37482	5.95031	6.07176	4.22291	6.33948	3.90161	3.24449	4.34051	3.06687	8.42212	8.79981	7.91215	1.73596	1.69297	1.66543	31.2684	6.1323	4.82133	3.55062	8.37803	1.69812
347	24	0	1	3	0	0	1	0	0	0	0	2	3450	1	31.4588	32.5989	30.5863	6.38357	5.83308	6.33117	4.31076	6.19215	4.20049	3.29629	4.2429	3.27061	8.47913	8.59065	8.29197	1.7456	1.6538	1.72533	31.548	6.18261	4.90113	3.60327	8.45392	1.70824
348	24	0	1	3	0	0	0	0	0	0	0	1	2500	0	31.4588	32.5989	30.5863	6.38357	5.83308	6.33117	4.31076	6.19215	4.20049	3.29629	4.2429	3.27061	8.47913	8.59065	8.29197	1.7456	1.6538	1.72533	31.548	6.18261	4.90113	3.60327	8.45392	1.70824
349	33	0	3	3	0	0	1	0	0	0	0	1	3450	1	32.1022	31.7761	29.965	6.46308	5.70889	6.21023	4.4794	6.03849	3.9452	3.39759	4.14827	3.10277	8.6348	8.35162	8.14586	1.77113	1.60846	1.71408	31.2811	6.1274	4.82103	3.54954	8.37743	1.69789
350	33	0	1	2	0	0	1	0	1	0	0	1	3750	0	32.1022	31.7761	28.2281	6.46308	5.70889	5.79457	4.4794	6.03849	3.57331	3.39759	4.14827	2.84383	8.6348	8.35162	7.56077	1.77113	1.60846	1.61342	30.7021	5.98884	4.69707	3.46323	8.1824	1.66434
351	34	0	1	2	0	0	0	0	0	0	0	2	2800	1	32.1022	31.7761	29.204	6.46308	5.70889	6.03449	4.4794	6.03849	3.80046	3.39759	4.14827	2.9947	8.6348	8.35162	7.9024	1.77113	1.60846	1.66968	31.0274	6.06882	4.77278	3.51352	8.29627	1.68309
352	34	0	1	3	0	0	1	0	0	0	0	2	3100	0	32.1022	31.7761	29.1312	6.46308	5.70889	6.01695	4.4794	6.03849	3.78173	3.39759	4.14827	2.98281	8.6348	8.35162	7.87365	1.77113	1.60846	1.66586	31.0032	6.06297	4.76654	3.50955	8.28669	1.68182
353	28	0	1	1	0	0	0	0	0	0	0	1	3550	1	33.0405	31.888	28.0753	6.64573	5.74971	5.78827	4.63149	6.14127	3.51711	3.4962	4.25412	2.7629	8.88908	8.3961	7.58911	1.81633	1.61581	1.61101	31.0012	6.06124	4.76329	3.50441	8.29143	1.68105
354	28	0	1	3	0	0	1	0	1	0	0	2	2800	0	33.0405	31.888	28.289	6.64573	5.74971	5.84336	4.63149	6.14127	3.57162	3.4962	4.25412	2.79788	8.88908	8.3961	7.67247	1.81633	1.61581	1.62187	31.0725	6.0796	4.78146	3.51607	8.31922	1.68467
355	34	0	1	2	0	0	0	0	0	0	0	2	3000	1	33.2939	31.8761	28.6358	6.69584	5.74071	5.93971	4.68108	6.1432	3.61292	3.52824	4.25772	2.83231	8.95871	8.39823	7.78984	1.82835	1.6152	1.64618	31.2686	6.12542	4.8124	3.53942	8.38226	1.69658
356	34	0	1	1	0	0	0	0	1	0	0	2	3750	0	33.2939	31.8761	27.6035	6.69584	5.74071	5.67685	4.68108	6.1432	3.39468	3.52824	4.25772	2.68351	8.95871	8.39823	7.42569	1.82835	1.6152	1.58381	30.9245	6.0378	4.73965	3.48982	8.26088	1.67578
357	28	0	3	3	0	0	1	0	1	0	0	1	3300	0	33.26	32.0664	28.0226	6.68814	5.77716	5.79348	4.68762	6.17327	3.47977	3.52893	4.28274	2.73437	8.94868	8.45958	7.57705	1.82422	1.62695	1.60969	31.1164	6.08626	4.78022	3.51535	8.32843	1.68696
358	28	0	3	3	0	0	1	0	0	0	0	2	3150	1	33.26	32.0664	27.9264	6.68814	5.77716	5.77026	4.68762	6.17327	3.46099	3.52893	4.28274	2.72171	8.94868	8.45958	7.54348	1.82422	1.62695	1.60518	31.0843	6.07852	4.77396	3.51113	8.31724	1.68545
359	32	0	1	3	0	0	0	0	0	0	0	1	3050	1	33.26	32.0664	28.6063	6.68814	5.77716	5.93719	4.68762	6.17327	3.59217	3.52893	4.28274	2.81591	8.94868	8.45958	7.77798	1.82422	1.62695	1.64512	31.3109	6.13416	4.81769	3.54253	8.39541	1.69876
360	32	0	1	2	0	1	1	1	0	0	0	1	3650	0	33.26	32.0664	28.3214	6.68814	5.77716	5.87546	4.68762	6.17327	3.53968	3.52893	4.28274	2.77979	8.94868	8.45958	7.68365	1.82422	1.62695	1.62828	31.2159	6.11359	4.80019	3.53049	8.36397	1.69315
361	26	0	3	2	0	0	0	0	0	0	0	1	2990	1	33.1921	32.2834	27.3321	6.68171	5.81703	5.61597	4.70061	6.19361	3.31698	3.5317	4.30435	2.62823	8.9311	8.53484	7.31444	1.81918	1.64122	1.56766	30.9358	6.03824	4.73707	3.48809	8.26013	1.67602
362	26	0	3	1	0	0	1	0	0	0	0	1	3400	0	33.1921	32.2834	27.1511	6.68171	5.81703	5.57686	4.70061	6.19361	3.28946	3.5317	4.30435	2.60867	8.9311	8.53484	7.25987	1.81918	1.64122	1.55705	30.8755	6.0252	4.72789	3.48157	8.24194	1.67248
363	26	0	1	2	0	0	0	0	0	0	0	1	3300	1	33.0561	32.7125	27.239	6.65941	5.89976	5.60067	4.69456	6.25543	3.24735	3.52299	4.36024	2.58189	8.89789	8.66929	7.27052	1.81111	1.66675	1.56718	31.0026	6.05328	4.73245	3.48837	8.27923	1.68168
364	26	0	1	2	0	0	0	0	0	0	0	1	3450	0	33.0561	32.7125	27.3686	6.65941	5.89976	5.65041	4.69456	6.25543	3.33606	3.52299	4.36024	2.62658	8.89789	8.66929	7.34044	1.81111	1.66675	1.5727	31.0457	6.06986	4.76202	3.50327	8.30254	1.68352
365	27	0	1	3	0	0	1	0	0	0	0	1	3250	1	32.7021	33.7	26.7355	6.5918	6.0894	5.55642	4.68876	6.43912	3.17174	3.5098	4.502	2.50477	8.8026	8.91296	7.21419	1.79089	1.71686	1.55008	31.0459	6.07921	4.76654	3.50552	8.30992	1.68594
366	27	0	1	2	0	1	0	1	1	0	0	1	3250	0	32.7021	33.7	26.5935	6.5918	6.0894	5.47276	4.68876	6.43912	3.06918	3.5098	4.502	2.44501	8.8026	8.91296	7.11825	1.79089	1.71686	1.53991	30.9986	6.05132	4.73235	3.4856	8.27794	1.68255
367	35	0	1	1	0	1	0	0	0	0	0	1	3050	1	32.7021	33.7	26.9861	6.5918	6.0894	5.62571	4.68876	6.43912	3.23452	3.5098	4.502	2.53972	8.8026	8.91296	7.31807	1.79089	1.71686	1.56324	31.1294	6.1023	4.78747	3.51717	8.34454	1.69033
368	35	0	3	2	0	1	0	0	0	0	0	2	2700	0	32.7021	33.7	26.6665	6.5918	6.0894	5.55403	4.68876	6.43912	3.18098	3.5098	4.502	2.50605	8.8026	8.91296	7.20683	1.79089	1.71686	1.54698	31.0229	6.07841	4.76962	3.50595	8.30746	1.68491
369	33	0	3	3	0	0	1	0	0	0	0	1	3150	1	32.6228	33.7532	26.5879	6.57689	6.11225	5.45741	4.72573	6.3982	3.07035	3.5254	4.48574	2.44012	8.76879	8.93967	7.10037	1.77943	1.72971	1.5332	30.988	6.04885	4.73143	3.48375	8.26961	1.68078
370	33	0	1	4	0	0	1	0	1	0	0	1	3600	0	32.6228	33.7532	26.4644	6.57689	6.11225	5.44035	4.72573	6.3982	3.06978	3.5254	4.48574	2.43877	8.76879	8.93967	7.07168	1.77943	1.72971	1.52655	30.9468	6.04316	4.73124	3.4833	8.26005	1.67856
371	27	0	3	3	0	0	1	0	0	0	0	2	2750	1	32.8122	33.5846	27.376	6.58419	6.0999	5.73075	4.84092	6.28029	3.336	3.58087	4.42927	2.61175	8.81998	8.89022	7.45567	1.77647	1.73103	1.58655	31.2576	6.13828	4.81907	3.54063	8.38863	1.69802
372	27	1	1	1	0	0	0	0	0	0	0	1	2900	0	32.8122	33.5846	26.2844	6.58419	6.0999	5.42872	4.84092	6.28029	3.09856	3.58087	4.42927	2.45766	8.81998	8.89022	7.04303	1.77647	1.73103	1.51675	30.8938	6.03761	4.73992	3.48926	8.25108	1.67475
373	28	0	1	3	0	0	0	0	0	0	0	1	2700	1	32.8122	33.5846	26.8981	6.58419	6.0999	5.60654	4.84092	6.28029	3.24951	3.58087	4.42927	2.54793	8.81998	8.89022	7.28949	1.77647	1.73103	1.55587	31.0983	6.09688	4.79024	3.51935	8.33323	1.68779
374	28	0	1	1	0	0	1	0	1	0	0	2	3250	0	32.8122	33.5846	26.6455	6.58419	6.0999	5.53643	4.84092	6.28029	3.18426	3.58087	4.42927	2.51161	8.81998	8.89022	7.18437	1.77647	1.73103	1.54275	31.0141	6.07351	4.76849	3.50725	8.29819	1.68342
375	22	0	3	1	0	0	0	0	0	0	0	2	2850	1	32.7441	33.6963	26.4145	6.56141	6.13298	5.45187	4.87199	6.25286	3.08816	3.5944	4.41796	2.46402	8.79405	8.92921	7.07615	1.76704	1.74262	1.53039	30.9516	6.04875	4.73767	3.49213	8.26647	1.68002
376	22	0	1	1	0	0	1	0	1	0	0	1	3800	0	32.7441	33.6963	26.0061	6.56141	6.13298	5.3688	4.87199	6.25286	3.06252	3.5944	4.41796	2.43323	8.79405	8.92921	6.95544	1.76704	1.74262	1.50078	30.8155	6.02106	4.72912	3.48186	8.22624	1.67015
377	28	0	1	4	0	0	0	0	0	0	0	2	3400	1	32.7544	33.6559	26.4528	6.55466	6.13431	5.434	4.89517	6.24032	3.07092	3.60654	4.41304	2.43606	8.78699	8.91698	7.07687	1.76407	1.74144	1.5294	30.9544	6.04099	4.73547	3.48521	8.26028	1.6783
378	28	1	3	1	0	0	1	0	0	0	0	2	3150	0	32.7544	33.6559	26.4034	6.55466	6.13431	5.45408	4.89517	6.24032	3.11335	3.60654	4.41304	2.46242	8.78699	8.91698	7.09711	1.76407	1.74144	1.5265	30.9379	6.04768	4.74961	3.494	8.26703	1.67734
379	40	0	1	2	0	1	1	0	0	1	0	2	3000	1	32.7544	33.6559	26.4781	6.55466	6.13431	5.47598	4.89517	6.24032	3.13262	3.60654	4.41304	2.47434	8.78699	8.91698	7.13047	1.76407	1.74144	1.53193	30.9628	6.05498	4.75603	3.49797	8.27815	1.67915
380	40	0	1	3	0	1	0	0	1	0	0	1	2900	0	32.7544	33.6559	26.4781	6.55466	6.13431	5.47598	4.89517	6.24032	3.13262	3.60654	4.41304	2.47434	8.78699	8.91698	7.13047	1.76407	1.74144	1.53193	30.9628	6.05498	4.75603	3.49797	8.27815	1.67915
381	28	0	1	3	0	1	1	1	0	0	0	1	3150	1	32.9538	33.3092	26.3841	6.56498	6.08905	5.42083	4.98786	6.13013	3.03507	3.65425	4.34858	2.42792	8.83429	8.82794	7.06078	1.76736	1.72957	1.52921	30.8824	6.02495	4.71769	3.47692	8.241	1.67538
382	28	0	3	1	0	0	1	0	0	0	0	1	3700	0	32.9538	33.3092	26.7499	6.56498	6.08905	5.49287	4.98786	6.13013	3.08922	3.65425	4.34858	2.45595	8.83429	8.82794	7.1644	1.76736	1.72957	1.54929	31.0043	6.04897	4.73574	3.48626	8.27554	1.68207
383	24	1	3	1	0	0	0	0	0	0	0	1	2900	1	33.0541	33.1877	26.5189	6.55904	6.07175	5.48327	5.05712	6.08094	3.07985	3.69523	4.30971	2.45542	8.85802	8.78407	7.12965	1.76668	1.72378	1.53786	30.9202	6.03802	4.7393	3.48678	8.25725	1.67611
384	24	0	1	2	0	0	1	0	0	0	0	1	3450	0	33.0541	33.1877	26.8411	6.55904	6.07175	5.59815	5.05712	6.08094	3.17932	3.69523	4.30971	2.51378	8.85802	8.78407	7.27683	1.76668	1.72378	1.56339	31.0276	6.07631	4.77246	3.50624	8.30631	1.68462
385	30	0	3	3	0	0	0	0	0	0	0	1	2350	1	33.8573	33.0943	25.2537	6.64433	6.09641	5.21061	5.21666	6.04929	2.81243	3.78219	4.28577	2.30754	9.08529	8.72444	6.76456	1.80622	1.71217	1.47957	30.7351	5.98378	4.6928	3.4585	8.19143	1.66598
386	30	0	1	2	0	0	0	0	0	0	0	2	3500	0	33.8573	33.0943	25.2537	6.64433	6.09641	5.21061	5.21666	6.04929	2.81243	3.78219	4.28577	2.30754	9.08529	8.72444	6.76456	1.80622	1.71217	1.47957	30.7351	5.98378	4.6928	3.4585	8.19143	1.66598
387	29	0	3	3	0	0	0	0	0	0	0	1	3600	1	34.0316	32.9322	25.4021	6.67845	6.06795	5.25329	5.23392	6.03606	2.84495	3.79198	4.2796	2.32708	9.13986	8.67737	6.81679	1.81559	1.70409	1.49124	30.7886	5.99989	4.70498	3.46622	8.21134	1.6703
388	29	0	1	2	0	0	1	0	1	1	0	2	3500	0	34.0316	32.9322	25.7068	6.67845	6.06795	5.33897	5.23392	6.03606	2.90371	3.79198	4.2796	2.36725	9.13986	8.67737	6.92183	1.81559	1.70409	1.51266	30.8902	6.02845	4.72456	3.47961	8.24635	1.67744
389	30	0	3	3	0	0	0	0	1	0	0	1	1800	1	34.2184	32.8207	25.7934	6.71686	6.04739	5.29099	5.28933	5.98891	2.84753	3.83211	4.24646	2.33052	9.17629	8.6665	6.88243	1.8203	1.70304	1.509	30.9442	6.01841	4.70859	3.4697	8.24174	1.67745
390	30	0	1	3	0	0	0	0	0	0	0	1	3300	0	34.2184	32.8207	25.5344	6.71686	6.04739	5.31142	5.28933	5.98891	2.92747	3.83211	4.24646	2.37012	9.17629	8.6665	6.88659	1.8203	1.70304	1.49762	30.8578	6.02522	4.73524	3.4829	8.24312	1.67365
391	26	0	3	1	0	0	1	0	1	0	0	1	3100	1	34.4949	32.6373	25.6383	6.75639	6.03563	5.29789	5.41692	5.88997	2.87055	3.8951	4.20328	2.34191	9.23036	8.65792	6.87908	1.82071	1.70848	1.50602	30.9235	6.02997	4.72581	3.4801	8.25578	1.6784
392	26	0	1	1	0	0	0	0	0	1	0	1	3350	0	34.4949	32.6373	25.4894	6.75639	6.03563	5.24005	5.41692	5.88997	2.83227	3.8951	4.20328	2.31768	9.23036	8.65792	6.81487	1.82071	1.70848	1.49216	30.8739	6.01069	4.71305	3.47202	8.23438	1.67378
393	30	0	3	2	0	0	0	0	0	0	0	2	3150	1	34.4949	32.6373	25.8484	6.75639	6.03563	5.33524	5.41692	5.88997	2.89917	3.8951	4.20328	2.35946	9.23036	8.65792	6.93494	1.82071	1.70848	1.5166	30.9935	6.04242	4.73535	3.48595	8.27441	1.68193
394	30	0	3	3	0	0	0	0	0	0	0	2	3100	0	34.4949	32.6373	25.3711	6.75639	6.03563	5.20945	5.41692	5.88997	2.81175	3.8951	4.20328	2.30307	9.23036	8.65792	6.77718	1.82071	1.70848	1.48405	30.8344	6.00049	4.70621	3.46715	8.22182	1.67108
395	37	0	1	1	0	1	1	0	0	0	0	2	3700	1	34.4949	32.6373	25.3205	6.75639	6.03563	5.2018	5.41692	5.88997	2.79752	3.8951	4.20328	2.29691	9.23036	8.65792	6.74339	1.82071	1.70848	1.48216	30.8175	5.99794	4.70147	3.4651	8.21055	1.67045
396	37	0	3	4	0	1	1	0	1	0	0	1	3350	0	34.4949	32.6373	25.8537	6.75639	6.03563	5.35289	5.41692	5.88997	2.91023	3.8951	4.20328	2.36917	9.23036	8.65792	6.94979	1.82071	1.70848	1.52001	30.9953	6.0483	4.73904	3.48919	8.27935	1.68307
397	26	0	1	3	0	1	1	1	0	1	0	1	3700	1	34.471	32.6208	25.8299	6.74692	6.04462	5.28213	5.43035	5.87641	2.83946	3.90417	4.19642	2.32242	9.22089	8.65227	6.88319	1.81799	1.70946	1.51017	30.9739	6.02456	4.71541	3.47434	8.25212	1.67921
398	26	0	3	3	0	0	0	0	0	0	0	1	2650	0	34.471	32.6208	25.4431	6.74692	6.04462	5.2252	5.43035	5.87641	2.82895	3.90417	4.19642	2.31563	9.22089	8.65227	6.801	1.81799	1.70946	1.489	30.845	6.00558	4.7119	3.47207	8.22472	1.67215
399	27	0	1	4	0	0	0	0	0	0	0	2	3150	1	34.471	32.6208	25.8032	6.74692	6.04462	5.32047	5.43035	5.87641	2.89649	3.90417	4.19642	2.35782	9.22089	8.65227	6.92158	1.81799	1.70946	1.51352	30.965	6.03734	4.73442	3.48613	8.26491	1.68032
400	27	0	3	3	0	0	1	0	0	1	0	2	3100	0	34.471	32.6208	25.8097	6.74692	6.04462	5.33875	5.43035	5.87641	2.90777	3.90417	4.19642	2.3677	9.22089	8.65227	6.93698	1.81799	1.70946	1.51705	30.9672	6.04343	4.73818	3.48943	8.27005	1.6815
401	30	0	1	1	0	0	1	0	0	0	0	1	2990	1	34.471	32.6208	25.8447	6.74692	6.04462	5.2846	5.43035	5.87641	2.83313	3.90417	4.19642	2.317	9.22089	8.65227	6.88794	1.81799	1.70946	1.51036	30.9789	6.02538	4.7133	3.47253	8.2537	1.67927
402	30	0	3	2	0	0	1	0	1	0	0	1	3200	0	34.471	32.6208	25.827	6.74692	6.04462	5.31639	5.43035	5.87641	2.89175	3.90417	4.19642	2.34884	9.22089	8.65227	6.92442	1.81799	1.70946	1.51434	30.973	6.03598	4.73284	3.48314	8.26586	1.68059
403	33	0	1	3	0	1	0	1	0	0	0	1	3150	1	34.1921	33.1279	25.2495	6.63234	6.18703	5.22586	5.57498	5.78928	2.8095	3.97218	4.16496	2.31071	9.12498	8.83285	6.74285	1.77242	1.76394	1.48555	30.8565	6.01508	4.72459	3.48262	8.23356	1.67397
404	33	0	3	3	0	0	1	0	0	0	0	2	2900	0	34.1921	33.1279	24.8325	6.63234	6.18703	5.09446	5.57498	5.78928	2.71647	3.97218	4.16496	2.24921	9.12498	8.83285	6.58541	1.77242	1.76394	1.4528	30.7175	5.97128	4.69358	3.46212	8.18108	1.66305
405	26	0	1	4	0	0	0	0	0	1	0	1	3250	1	34.0207	33.2655	25.4751	6.58629	6.2186	5.20426	5.57898	5.77742	2.76001	3.96805	4.16468	2.2766	9.06695	8.87799	6.74834	1.75832	1.77496	1.48758	30.9204	6.00305	4.70547	3.46978	8.2311	1.67362
406	26	0	1	1	0	0	1	0	1	0	0	1	2950	0	34.0207	33.2655	24.7305	6.58629	6.2186	5.03687	5.57898	5.77742	2.63957	3.96805	4.16468	2.189	9.06695	8.87799	6.52216	1.75832	1.77496	1.44189	30.6722	5.94725	4.66532	3.44058	8.1557	1.65839
407	27	0	1	1	0	0	0	0	0	0	0	1	3400	1	34.0207	33.2655	25.0242	6.58629	6.2186	5.14017	5.57898	5.77742	2.76009	3.96805	4.16468	2.2797	9.06695	8.87799	6.64682	1.75832	1.77496	1.46498	30.7701	5.98169	4.70549	3.47081	8.19726	1.66608
408	27	0	1	3	0	0	1	0	0	1	0	2	2800	0	34.0207	33.2655	25.3867	6.58629	6.2186	5.18403	5.57898	5.77742	2.73726	3.96805	4.16468	2.25891	9.06695	8.87799	6.72063	1.75832	1.77496	1.48203	30.891	5.99631	4.69789	3.46388	8.22186	1.67177
409	28	0	1	1	0	0	0	0	0	0	0	2	2950	1	34.0207	33.2655	25.4676	6.58629	6.2186	5.20693	5.57898	5.77742	2.77582	3.96805	4.16468	2.28932	9.06695	8.87799	6.74522	1.75832	1.77496	1.48932	30.9179	6.00394	4.71074	3.47402	8.23005	1.6742
410	28	0	3	2	0	0	1	0	0	0	0	2	3400	0	34.0207	33.2655	25.4881	6.58629	6.2186	5.21054	5.57898	5.77742	2.76982	3.96805	4.16468	2.2839	9.06695	8.87799	6.75208	1.75832	1.77496	1.48979	30.9248	6.00515	4.70874	3.47221	8.23234	1.67436
411	34	1	1	1	0	0	1	0	0	0	0	1	3200	1	34.0207	33.2655	24.858	6.58629	6.2186	5.10234	5.57898	5.77742	2.72499	3.96805	4.16468	2.25852	9.06695	8.87799	6.5754	1.75832	1.77496	1.45513	30.7148	5.96908	4.69379	3.46375	8.17345	1.6628
412	34	0	3	1	0	0	1	0	1	0	0	1	3450	0	34.0207	33.2655	24.8713	6.58629	6.2186	5.07148	5.57898	5.77742	2.66625	3.96805	4.16468	2.20791	9.06695	8.87799	6.5643	1.75832	1.77496	1.45096	30.7192	5.95879	4.67422	3.44688	8.16975	1.66141
413	26	0	1	4	0	0	1	0	0	0	0	1	3550	1	33.7301	33.5509	25.4946	6.49002	6.32089	5.18561	5.59684	5.75616	2.77658	3.95916	4.17574	2.28819	8.94813	8.99611	6.73478	1.72807	1.80612	1.48522	30.9252	5.99884	4.70986	3.47436	8.22634	1.67313
414	26	0	3	2	0	1	1	1	1	0	0	1	3350	0	33.7301	33.5509	25.4093	6.49002	6.32089	5.16292	5.59684	5.75616	2.73652	3.95916	4.17574	2.25668	8.94813	8.99611	6.70979	1.72807	1.80612	1.47786	30.8968	5.99128	4.69651	3.46386	8.21801	1.67068
415	29	0	3	1	0	0	1	0	0	0	0	1	3100	1	33.7301	33.5509	25.3075	6.49002	6.32089	5.13616	5.59684	5.75616	2.71873	3.95916	4.17574	2.24391	8.94813	8.99611	6.67839	1.72807	1.80612	1.47091	30.8628	5.98236	4.69058	3.4596	8.20754	1.66837
416	29	0	3	3	0	1	1	1	1	0	0	1	3650	0	33.7301	33.5509	25.5017	6.49002	6.32089	5.18339	5.59684	5.75616	2.76013	3.95916	4.17574	2.275	8.94813	8.99611	6.7383	1.72807	1.80612	1.48351	30.9276	5.9981	4.70438	3.46996	8.22751	1.67256
417	23	0	2	2	0	1	1	0	0	0	0	1	3170	1	33.6365	33.5877	25.5524	6.45363	6.34447	5.18958	5.60311	5.7384	2.78174	3.95208	4.17033	2.29361	8.89838	9.02601	6.74242	1.71557	1.81382	1.48601	30.9255	5.99589	4.70775	3.47201	8.22227	1.6718
418	23	0	1	1	0	0	1	0	0	0	0	2	3050	0	33.6365	33.5877	25.2507	6.45363	6.34447	5.18137	5.60311	5.7384	2.8081	3.95208	4.17033	2.31095	8.89838	9.02601	6.70759	1.71557	1.81382	1.47519	30.825	5.99316	4.71654	3.47779	8.21066	1.6682
419	20	0	3	3	0	0	0	0	0	0	0	1	2450	1	33.4792	33.6068	24.7556	6.4115	6.35277	5.0106	5.59826	5.71869	2.63511	3.9364	4.1604	2.1853	8.84275	9.04293	6.50424	1.7025	1.82025	1.43416	30.6139	5.92496	4.65069	3.42737	8.12997	1.6523
420	20	0	3	2	0	0	1	0	0	0	0	1	2950	0	33.4792	33.6068	24.6545	6.4115	6.35277	4.99486	5.59826	5.71869	2.62305	3.9364	4.1604	2.17499	8.84275	9.04293	6.48127	1.7025	1.82025	1.43114	30.5802	5.91971	4.64667	3.42393	8.12232	1.65129
421	23	0	3	3	0	1	0	0	1	0	0	2	2780	1	33.4792	33.6068	24.7556	6.4115	6.35277	5.0106	5.59826	5.71869	2.63511	3.9364	4.1604	2.1853	8.84275	9.04293	6.50424	1.7025	1.82025	1.43416	30.6139	5.92496	4.65069	3.42737	8.12997	1.6523
422	23	0	3	2	0	0	1	0	0	0	0	1	3600	0	33.4792	33.6068	24.7556	6.4115	6.35277	5.0106	5.59826	5.71869	2.63511	3.9364	4.1604	2.1853	8.84275	9.04293	6.50424	1.7025	1.82025	1.43416	30.6139	5.92496	4.65069	3.42737	8.12997	1.6523
423	29	0	1	4	0	0	1	0	0	0	0	2	2750	1	33.4792	33.6068	25.0175	6.4115	6.35277	5.09334	5.59826	5.71869	2.74454	3.9364	4.1604	2.27256	8.84275	9.04293	6.60361	1.7025	1.82025	1.45248	30.7012	5.95254	4.68716	3.45645	8.1631	1.65841
424	29	0	1	3	0	0	1	0	0	1	0	1	3300	0	33.4792	33.6068	25.583	6.4115	6.35277	5.18695	5.59826	5.71869	2.75546	3.9364	4.1604	2.27431	8.84275	9.04293	6.7459	1.7025	1.82025	1.48304	30.8897	5.98374	4.6908	3.45704	8.21053	1.66859
425	26	0	3	3	0	0	0	0	1	0	0	1	3350	1	33.3497	33.5189	24.9892	6.36434	6.35234	5.05664	5.64455	5.6664	2.63334	3.94707	4.13436	2.19611	8.7754	9.03926	6.5671	1.69016	1.82231	1.45164	30.6193	5.92444	4.6481	3.42585	8.12725	1.6547
426	26	0	1	1	0	1	1	0	0	0	0	1	3600	0	33.3497	33.5189	24.5953	6.36434	6.35234	4.99003	5.64455	5.6664	2.58111	3.94707	4.13436	2.15247	8.7754	9.03926	6.47079	1.69016	1.82231	1.43447	30.488	5.90223	4.63069	3.4113	8.09515	1.64898
427	30	0	3	1	0	0	1	0	0	0	0	1	3300	1	33.3497	33.5189	25.7554	6.36434	6.35234	5.22877	5.64455	5.6664	2.7675	3.94707	4.13436	2.29562	8.7754	9.03926	6.79776	1.69016	1.82231	1.49972	30.8747	5.98181	4.69282	3.45902	8.20414	1.67073
428	30	0	1	2	0	0	0	0	0	0	0	2	2900	0	33.3497	33.5189	25.6517	6.36434	6.35234	5.20256	5.64455	5.6664	2.72579	3.94707	4.13436	2.26204	8.7754	9.03926	6.76808	1.69016	1.82231	1.4912	30.8401	5.97308	4.67892	3.44783	8.19425	1.66789
429	31	0	3	2	0	0	1	0	1	0	0	1	3400	1	33.3089	33.7882	24.6594	6.34316	6.42479	4.98748	5.67332	5.66755	2.58942	3.96074	4.14322	2.16138	8.75576	9.12757	6.46197	1.6877	1.8415	1.43094	30.5855	5.91848	4.64343	3.42178	8.1151	1.65338
430	31	0	3	3	0	0	1	0	1	0	0	1	3550	0	33.3089	33.7882	24.1597	6.34316	6.42479	4.89046	5.67332	5.66755	2.53389	3.96074	4.14322	2.11618	8.75576	9.12757	6.31265	1.6877	1.8415	1.40734	30.419	5.88614	4.62492	3.40671	8.06533	1.64551
431	24	0	1	4	0	0	0	0	0	0	0	2	3000	1	33.3421	33.4382	25.1643	6.28998	6.41739	5.07217	5.76445	5.51675	2.65902	3.99193	4.0569	2.21213	8.71193	9.08247	6.59141	1.68073	1.8391	1.45602	30.6482	5.92652	4.64674	3.42032	8.12861	1.65862
432	24	0	1	2	0	0	0	0	0	0	0	2	3350	0	33.3421	33.4382	24.1217	6.28998	6.41739	4.8646	5.76445	5.51675	2.53457	3.99193	4.0569	2.10192	8.71193	9.08247	6.32008	1.68073	1.8391	1.41252	30.3007	5.85733	4.60526	3.38358	8.03816	1.64412
433	28	0	1	2	0	0	0	0	0	0	0	1	3500	1	33.3421	33.4382	25.0181	6.28998	6.41739	5.03339	5.76445	5.51675	2.62862	3.99193	4.0569	2.19109	8.71193	9.08247	6.54445	1.68073	1.8391	1.44661	30.5995	5.91359	4.63661	3.41331	8.11295	1.65548
434	28	0	1	3	0	0	0	0	1	0	0	1	3250	0	33.3421	33.4382	24.1744	6.28998	6.41739	4.86773	5.76445	5.51675	2.51565	3.99193	4.0569	2.10476	8.71193	9.08247	6.30983	1.68073	1.8391	1.4011	30.3183	5.85837	4.59895	3.38453	8.03475	1.64031
435	29	0	3	3	0	0	0	0	0	0	0	1	3000	1	33.3494	33.2816	25.2532	6.27522	6.40294	5.077	5.78737	5.47113	2.68067	4.00684	4.02348	2.23211	8.70094	9.05076	6.6018	1.68006	1.83468	1.45968	30.6281	5.91839	4.64639	3.42081	8.11783	1.65814
436	29	0	1	3	0	0	1	0	1	0	0	2	3000	0	33.3494	33.2816	24.2817	6.27522	6.40294	4.87158	5.78737	5.47113	2.52499	4.00684	4.02348	2.11425	8.70094	9.05076	6.32365	1.68006	1.83468	1.40139	30.3042	5.84991	4.5945	3.38152	8.02512	1.63871
437	24	0	1	1	0	0	1	0	0	0	0	2	3500	0	33.3024	32.9409	24.0579	6.24207	6.349	4.83664	5.81066	5.38659	2.50372	4.01702	3.96477	2.09823	8.66827	8.96535	6.26039	1.67633	1.81847	1.39539	30.1004	5.80924	4.56699	3.36001	7.96467	1.63006
438	24	0	1	1	0	0	1	0	0	0	0	1	3950	1	33.3024	32.9409	24.6185	6.24207	6.349	4.93839	5.81066	5.38659	2.58004	4.01702	3.96477	2.15831	8.66827	8.96535	6.41052	1.67633	1.81847	1.42046	30.2873	5.84315	4.59243	3.38003	8.01472	1.63842
439	27	0	1	2	0	0	1	0	0	0	0	1	2900	1	33.3024	32.9409	24.0912	6.24207	6.349	4.83961	5.81066	5.38659	2.52185	4.01702	3.96477	2.11055	8.66827	8.96535	6.25637	1.67633	1.81847	1.3963	30.1115	5.81022	4.57303	3.36411	7.96333	1.63037
440	27	0	1	1	0	1	0	1	0	0	0	2	3230	0	33.3024	32.9409	23.9401	6.24207	6.349	4.8349	5.81066	5.38659	2.49419	4.01702	3.96477	2.08012	8.66827	8.96535	6.2439	1.67633	1.81847	1.39832	30.0612	5.80865	4.56381	3.35397	7.95917	1.63104
441	28	0	1	4	0	0	1	0	0	0	0	1	3350	1	33.3024	32.9409	24.46	6.24207	6.349	4.90133	5.81066	5.38659	2.55102	4.01702	3.96477	2.13745	8.66827	8.96535	6.36518	1.67633	1.81847	1.41064	30.2345	5.8308	4.58276	3.37308	7.9996	1.63515
442	28	0	1	1	0	0	0	0	0	0	0	1	3000	0	33.3024	32.9409	24.129	6.24207	6.349	4.85149	5.81066	5.38659	2.51127	4.01702	3.96477	2.10335	8.66827	8.96535	6.28809	1.67633	1.81847	1.39863	30.1241	5.81418	4.56951	3.36171	7.97391	1.63114
443	24	0	3	1	0	0	1	0	0	0	0	1	3200	1	33.1954	32.7731	24.1894	6.19048	6.32623	4.86573	5.84851	5.2948	2.52918	4.02631	3.91266	2.11495	8.62002	8.92253	6.30499	1.66388	1.81267	1.40109	30.0526	5.79415	4.5575	3.35131	7.94918	1.62588
444	24	0	1	1	0	0	1	0	0	0	0	1	3000	0	33.1954	32.7731	23.9004	6.19048	6.32623	4.83509	5.84851	5.2948	2.49921	4.02631	3.91266	2.08198	8.62002	8.92253	6.23698	1.66388	1.81267	1.39821	29.9563	5.78393	4.54751	3.34032	7.92651	1.62492
445	26	0	3	1	0	0	1	0	0	0	0	1	3550	1	33.1954	32.7731	23.7722	6.19048	6.32623	4.80369	5.84851	5.2948	2.48923	4.02631	3.91266	2.08016	8.62002	8.92253	6.19276	1.66388	1.81267	1.39009	29.9136	5.77347	4.54418	3.33971	7.91177	1.62221
446	26	0	3	3	0	1	0	0	0	0	0	2	3150	0	33.1954	32.7731	24.2799	6.19048	6.32623	4.88736	5.84851	5.2948	2.55242	4.02631	3.91266	2.10777	8.62002	8.92253	6.36518	1.66388	1.81267	1.41725	30.0828	5.80136	4.56525	3.34891	7.96924	1.63126
447	26	0	1	2	0	0	0	0	0	0	0	1	3450	1	33.1954	32.7731	24.422	6.19048	6.32623	4.90245	5.84851	5.2948	2.55749	4.02631	3.91266	2.14034	8.62002	8.92253	6.35897	1.66388	1.81267	1.41068	30.1302	5.80639	4.56693	3.35977	7.96717	1.62907
448	26	0	3	1	0	0	1	0	0	0	0	2	3700	0	33.1954	32.7731	25.2871	6.19048	6.32623	5.08905	5.84851	5.2948	2.69353	4.02631	3.91266	2.24062	8.62002	8.92253	6.61335	1.66388	1.81267	1.46227	30.4185	5.86859	4.61228	3.3932	8.05197	1.64627
449	28	0	1	2	0	0	1	0	0	0	0	2	3400	1	33.1954	32.7731	24.2879	6.19048	6.32623	4.88373	5.84851	5.2948	2.54588	4.02631	3.91266	2.10238	8.62002	8.92253	6.37096	1.66388	1.81267	1.41589	30.0855	5.80015	4.56307	3.34712	7.97117	1.63081
450	28	0	3	3	0	0	0	0	1	0	0	1	3050	0	33.1954	32.7731	24.7304	6.19048	6.32623	4.96632	5.84851	5.2948	2.60438	4.02631	3.91266	2.17324	8.62002	8.92253	6.44959	1.66388	1.81267	1.42846	30.233	5.82768	4.58256	3.37074	7.99738	1.635
451	29	0	2	3	0	0	1	0	1	0	0	2	3200	1	33.1954	32.7731	25.272	6.19048	6.32623	5.08872	5.84851	5.2948	2.71072	4.02631	3.91266	2.255	8.62002	8.92253	6.60532	1.66388	1.81267	1.46361	30.4135	5.86848	4.61801	3.39799	8.04929	1.64672
452	29	0	1	4	0	0	1	0	0	0	0	1	4050	0	33.1954	32.7731	24.9101	6.19048	6.32623	5.0015	5.84851	5.2948	2.62542	4.02631	3.91266	2.18839	8.62002	8.92253	6.50276	1.66388	1.81267	1.43821	30.2929	5.8394	4.58958	3.37579	8.0151	1.63825
453	30	0	3	2	0	0	1	0	0	0	0	1	3050	1	33.1954	32.7731	24.9101	6.19048	6.32623	5.0015	5.84851	5.2948	2.62542	4.02631	3.91266	2.18839	8.62002	8.92253	6.50276	1.66388	1.81267	1.43821	30.2929	5.8394	4.58958	3.37579	8.0151	1.63825
454	30	0	1	2	0	0	1	0	0	0	0	1	3100	0	33.1954	32.7731	23.988	6.19048	6.32623	4.83331	5.84851	5.2948	2.51826	4.02631	3.91266	2.10539	8.62002	8.92253	6.23669	1.66388	1.81267	1.39536	29.9855	5.78334	4.55386	3.34812	7.92641	1.62397
455	29	0	3	1	0	0	0	0	0	0	0	1	2700	0	32.9864	32.8389	24.2903	6.12014	6.35016	4.87843	5.84855	5.24682	2.55404	4.00494	3.88868	2.13637	8.55817	8.93742	6.32413	1.64747	1.81996	1.40338	30.0385	5.78291	4.5498	3.34333	7.93991	1.6236
456	29	0	3	2	0	0	0	0	0	0	0	2	3150	1	32.9864	32.8389	23.9572	6.12014	6.35016	4.82818	5.84855	5.24682	2.51312	4.00494	3.88868	2.10142	8.55817	8.93742	6.24663	1.64747	1.81996	1.39135	29.9275	5.76616	4.53617	3.33168	7.91407	1.61959
457	33	0	1	2	0	0	0	0	0	0	0	1	3050	1	32.9864	32.8389	24.0581	6.12014	6.35016	4.84186	5.84855	5.24682	2.52543	4.00494	3.88868	2.11075	8.55817	8.93742	6.27036	1.64747	1.81996	1.39386	29.9611	5.77072	4.54027	3.33479	7.92199	1.62043
458	33	0	1	1	0	0	0	0	1	0	0	2	3350	0	32.9864	32.8389	23.8865	6.12014	6.35016	4.81325	5.84855	5.24682	2.50535	4.00494	3.88868	2.09619	8.55817	8.93742	6.21875	1.64747	1.81996	1.38811	29.9039	5.76118	4.53357	3.32994	7.90478	1.61851
459	35	0	1	4	0	1	1	0	0	0	0	2	2950	1	32.9864	32.8389	23.9572	6.12014	6.35016	4.82818	5.84855	5.24682	2.51312	4.00494	3.88868	2.10142	8.55817	8.93742	6.24663	1.64747	1.81996	1.39135	29.9275	5.76616	4.53617	3.33168	7.91407	1.61959
460	35	0	3	1	0	1	1	0	0	0	0	1	2900	0	32.9864	32.8389	25.0921	6.12014	6.35016	5.05517	5.84855	5.24682	2.67883	4.00494	3.88868	2.22544	8.55817	8.93742	6.56363	1.64747	1.81996	1.45113	30.3058	5.84182	4.5914	3.37302	8.01974	1.63952
461	25	0	3	3	0	0	0	0	0	0	0	2	3200	1	32.9754	32.7814	24.0507	6.07907	6.36341	4.84188	5.91126	5.144	2.54974	4.0311	3.82471	2.10371	8.54127	8.92843	6.29879	1.63845	1.82376	1.40455	29.9359	5.76145	4.535	3.31984	7.92283	1.62225
462	25	0	1	3	0	0	0	0	0	0	0	1	3400	0	32.9754	32.7814	24.0296	6.07907	6.36341	4.82834	5.91126	5.144	2.53784	4.0311	3.82471	2.12171	8.54127	8.92843	6.24937	1.63845	1.82376	1.38871	29.9288	5.75694	4.53103	3.32584	7.90636	1.61697
463	34	0	1	1	0	0	0	0	1	0	0	2	2550	1	32.9754	32.7814	24.4671	6.07907	6.36341	4.91362	5.91126	5.144	2.60335	4.0311	3.82471	2.17112	8.54127	8.92843	6.3713	1.63845	1.82376	1.41327	30.0746	5.78537	4.55287	3.34231	7.947	1.62516
464	34	0	3	2	0	0	0	0	1	0	0	2	3000	0	32.9754	32.7814	24.226	6.07907	6.36341	4.86405	5.91126	5.144	2.56826	4.0311	3.82471	2.14793	8.54127	8.92843	6.29707	1.63845	1.82376	1.40005	29.9943	5.76884	4.54117	3.33458	7.92226	1.62075
465	31	0	1	2	0	0	1	0	0	0	0	1	2900	1	33.165	32.3604	24.15	6.08552	6.30314	4.8579	5.98998	5.03274	2.56103	4.06904	3.75956	2.11328	8.57027	8.83573	6.32202	1.64098	1.80766	1.40987	29.8918	5.74885	4.52792	3.31396	7.90934	1.6195
466	31	0	1	2	0	0	1	0	1	0	0	1	3200	0	33.165	32.3604	23.6494	6.08552	6.30314	4.77062	5.98998	5.03274	2.50254	4.06904	3.75956	2.09197	8.57027	8.83573	6.1451	1.64098	1.80766	1.38152	29.7249	5.71976	4.50842	3.30686	7.85036	1.61005
467	26	0	1	1	0	0	1	0	0	0	0	2	2950	0	33.564	31.7563	24.135	6.13587	6.22544	4.84475	6.16574	4.82618	2.5722	4.17911	3.62586	2.12758	8.68288	8.67214	6.30634	1.65849	1.78258	1.40913	29.8184	5.73535	4.52137	3.31085	7.88712	1.61673
468	26	0	3	3	0	0	1	0	0	0	0	2	2700	1	33.564	31.7563	23.9988	6.13587	6.22544	4.80916	6.16574	4.82618	2.52159	4.17911	3.62586	2.09018	8.68288	8.67214	6.26782	1.65849	1.78258	1.39627	29.773	5.72349	4.5045	3.29838	7.87428	1.61245
469	25	0	1	3	0	0	0	0	0	0	0	2	1750	0	34.0407	31.1588	24.191	6.20252	6.14099	4.84074	6.30731	4.66039	2.54748	4.27181	3.51666	2.11017	8.84822	8.48635	6.31958	1.68488	1.75189	1.40661	29.7968	5.72809	4.50506	3.29955	7.88471	1.61446
470	25	0	3	2	0	1	0	0	0	0	0	1	2880	1	34.0407	31.1588	24.191	6.20252	6.14099	4.84074	6.30731	4.66039	2.54748	4.27181	3.51666	2.11017	8.84822	8.48635	6.31958	1.68488	1.75189	1.40661	29.7968	5.72809	4.50506	3.29955	7.88471	1.61446
471	26	0	1	3	0	0	1	0	0	0	0	2	3100	1	34.0407	31.1588	24.0348	6.20252	6.14099	4.82175	6.30731	4.66039	2.55623	4.27181	3.51666	2.14092	8.84822	8.48635	6.22107	1.68488	1.75189	1.39452	29.7447	5.72175	4.50798	3.3098	7.85188	1.61043
472	26	0	1	2	0	0	1	0	1	0	0	2	2950	0	34.0407	31.1588	23.4925	6.20252	6.14099	4.68389	6.30731	4.66039	2.42465	4.27181	3.51666	2.0187	8.84822	8.48635	6.1185	1.68488	1.75189	1.36012	29.564	5.6758	4.46412	3.26906	7.81769	1.59897
473	33	0	3	1	0	0	0	0	1	0	0	1	2300	1	34.0407	31.1588	24.0892	6.20252	6.14099	4.82276	6.30731	4.66039	2.52683	4.27181	3.51666	2.09715	8.84822	8.48635	6.28584	1.68488	1.75189	1.40103	29.7629	5.72209	4.49818	3.29521	7.87347	1.6126
474	33	0	1	4	0	0	0	0	1	1	0	1	3350	0	34.0407	31.1588	24.6981	6.20252	6.14099	4.93857	6.30731	4.66039	2.63715	4.27181	3.51666	2.20752	8.84822	8.48635	6.40531	1.68488	1.75189	1.42242	29.9658	5.76069	4.53495	3.332	7.91329	1.61973
475	23	0	3	1	0	0	0	0	0	0	0	1	3100	1	34.3334	30.9063	24.0082	6.23992	6.12332	4.78594	6.39382	4.59173	2.4808	4.33386	3.47402	2.05666	8.94547	8.40258	6.26113	1.69929	1.7399	1.3915	29.7493	5.71639	4.48878	3.28818	7.86973	1.61023
476	23	0	3	4	0	0	1	0	0	1	0	2	3400	0	34.3334	30.9063	24.6106	6.23992	6.12332	4.90489	6.39382	4.59173	2.59906	4.33386	3.47402	2.17265	8.94547	8.40258	6.37446	1.69929	1.7399	1.41696	29.9501	5.75605	4.5282	3.32684	7.9075	1.61872
477	29	1	3	3	0	0	0	0	0	0	0	1	3800	1	34.6755	30.6501	24.2142	6.27677	6.10827	4.83975	6.46767	4.53364	2.56087	4.38654	3.43853	2.1129	9.04883	8.32218	6.30594	1.71782	1.72581	1.4147	29.8466	5.7416	4.52072	3.31266	7.89232	1.61944
478	29	0	3	1	0	0	1	0	0	0	0	2	3100	0	34.6755	30.6501	24.3759	6.27677	6.10827	4.86784	6.46767	4.53364	2.5662	4.38654	3.43853	2.10932	9.04883	8.32218	6.36092	1.71782	1.72581	1.41948	29.9005	5.75096	4.5225	3.31146	7.91065	1.62104
479	30	0	1	3	0	0	1	0	0	0	0	1	3000	1	34.6755	30.6501	24.3835	6.27677	6.10827	4.86404	6.46767	4.53364	2.55874	4.38654	3.43853	2.1033	9.04883	8.32218	6.36742	1.71782	1.72581	1.41794	29.903	5.74969	4.52002	3.30946	7.91281	1.62053
480	30	0	3	3	0	0	0	0	1	0	0	2	2950	0	34.6755	30.6501	24.2497	6.27677	6.10827	4.83091	6.46767	4.53364	2.53203	4.38654	3.43853	2.08449	9.04883	8.32218	6.32914	1.71782	1.72581	1.40771	29.8584	5.73865	4.51111	3.30318	7.90005	1.61711
481	29	0	1	2	0	0	1	0	0	0	0	1	2700	1	35.1482	30.2241	23.9533	6.33295	6.0639	4.79734	6.58194	4.42634	2.49942	4.46443	3.36748	2.07176	9.18871	8.19409	6.2094	1.74174	1.70438	1.39744	29.7752	5.7314	4.50257	3.30122	7.86407	1.61452
482	29	0	1	2	0	0	0	0	0	0	0	2	2950	0	35.1482	30.2241	24.38	6.33295	6.0639	4.85788	6.58194	4.42634	2.55953	4.46443	3.36748	2.10129	9.18871	8.19409	6.35532	1.74174	1.70438	1.41898	29.9175	5.75158	4.5226	3.31107	7.91271	1.6217
483	28	0	1	3	0	0	1	0	0	1	0	1	3550	1	35.4069	30.0853	24.2059	6.35579	6.05699	4.82712	6.65682	4.38786	2.50697	4.52813	3.32809	2.06488	9.27762	8.12434	6.31479	1.75828	1.68934	1.4141	29.8994	5.74663	4.51722	3.30703	7.90558	1.62058
484	28	0	1	2	0	0	1	0	1	0	0	2	2950	0	35.4069	30.0853	24.048	6.35579	6.05699	4.787	6.65682	4.38786	2.46641	4.52813	3.32809	2.03693	9.27762	8.12434	6.27245	1.75828	1.68934	1.40194	29.8467	5.73326	4.5037	3.29772	7.89147	1.61652
485	35	0	1	1	0	1	1	1	0	0	0	1	2950	1	35.4069	30.0853	23.7922	6.35579	6.05699	4.72562	6.65682	4.38786	2.40655	4.52813	3.32809	1.99684	9.27762	8.12434	6.19097	1.75828	1.68934	1.38188	29.7615	5.7128	4.48374	3.28436	7.86431	1.60983
486	35	0	3	3	0	1	0	0	0	0	0	2	3400	0	35.4069	30.0853	23.9447	6.35579	6.05699	4.76946	6.65682	4.38786	2.44673	4.52813	3.32809	2.02505	9.27762	8.12434	6.23821	1.75828	1.68934	1.3962	29.8123	5.72741	4.49714	3.29376	7.88006	1.61461
487	27	0	1	3	0	0	0	0	0	0	0	1	2900	1	35.8073	29.4277	24.3239	6.39744	5.95769	4.84158	6.75886	4.24172	2.4989	4.60962	3.21429	2.06158	9.40976	7.92074	6.35074	1.77901	1.65353	1.41665	29.853	5.73223	4.49982	3.29516	7.89375	1.6164
488	27	0	1	3	0	0	1	0	0	0	0	2	3500	0	35.8073	29.4277	24.1749	6.39744	5.95769	4.81809	6.75886	4.24172	2.47019	4.60962	3.21429	2.04457	9.40976	7.92074	6.30195	1.77901	1.65353	1.41001	29.8033	5.72441	4.49026	3.28949	7.87748	1.61418
489	35	0	3	2	1	1	0	0	0	0	0	1	2100	1	35.8073	29.4277	24.4581	6.39744	5.95769	4.88041	6.75886	4.24172	2.53311	4.60962	3.21429	2.08649	9.40976	7.92074	6.38465	1.77901	1.65353	1.42925	29.8977	5.74518	4.51123	3.30347	7.90505	1.6206
490	35	0	3	1	0	1	1	0	0	0	0	2	3050	0	35.8073	29.4277	24.465	6.39744	5.95769	4.8763	6.75886	4.24172	2.52579	4.60962	3.21429	2.08053	9.40976	7.92074	6.39109	1.77901	1.65353	1.42753	29.9	5.74381	4.50879	3.30148	7.9072	1.62002
491	26	0	3	2	0	0	1	0	0	0	0	2	2700	1	36.6452	28.1818	24.4831	6.5053	5.75998	4.91427	6.932	4.0097	2.51805	4.72449	3.05307	2.09738	9.65493	7.56043	6.3568	1.82615	1.5831	1.43457	29.7701	5.72652	4.48658	3.29165	7.85739	1.6146
492	26	0	1	3	0	0	0	0	0	0	0	2	2700	0	36.6452	28.1818	24.8455	6.5053	5.75998	4.9609	6.932	4.0097	2.57992	4.72449	3.05307	2.1301	9.65493	7.56043	6.48313	1.82615	1.5831	1.45457	29.8908	5.74206	4.50721	3.30255	7.8995	1.62127
493	30	0	1	3	0	0	1	0	0	0	0	2	2500	1	36.7061	27.8082	25.0276	6.50341	5.69665	4.99181	6.96183	3.93395	2.5776	4.74057	3.00531	2.12601	9.65759	7.45577	6.54629	1.82673	1.56365	1.45951	29.8473	5.73062	4.49112	3.29063	7.88655	1.61663
494	30	0	1	2	0	0	1	0	0	0	0	2	3500	0	36.7061	27.8082	23.9877	6.50341	5.69665	4.76885	6.96183	3.93395	2.40831	4.74057	3.00531	2.00226	9.65759	7.45577	6.24873	1.82673	1.56365	1.39328	29.5007	5.6563	4.4347	3.24938	7.78736	1.59455
495	31	0	1	3	0	1	0	0	0	0	0	1	2820	1	36.7061	27.8082	24.7484	6.50341	5.69665	4.92942	6.96183	3.93395	2.51188	4.74057	3.00531	2.08164	9.65759	7.45577	6.4616	1.82673	1.56365	1.44003	29.7542	5.70983	4.46922	3.27584	7.85832	1.61014
496	31	0	1	3	0	0	1	0	0	0	0	1	3200	0	36.7061	27.8082	24.7904	6.50341	5.69665	4.94493	6.96183	3.93395	2.53201	4.74057	3.00531	2.09777	9.65759	7.45577	6.4704	1.82673	1.56365	1.44651	29.7682	5.715	4.47593	3.28122	7.86126	1.6123
497	28	0	1	1	0	0	1	0	0	1	0	1	2900	1	36.5325	27.5803	24.8364	6.47415	5.64241	4.9981	6.92604	3.90234	2.54272	4.71706	2.98132	2.12403	9.61692	7.38579	6.45391	1.81883	1.54932	1.45739	29.6498	5.70489	4.45703	3.27414	7.81887	1.60851
498	28	0	1	1	0	0	1	0	0	0	0	2	3950	0	36.5325	27.5803	24.2968	6.47415	5.64241	4.83547	6.92604	3.90234	2.43673	4.71706	2.98132	2.03013	9.61692	7.38579	6.32817	1.81883	1.54932	1.41172	29.4699	5.65068	4.4217	3.24284	7.77696	1.59329
499	27	0	2	2	0	0	0	0	1	0	0	2	3000	0	36.2876	27.7784	24.6114	6.43249	5.67818	4.95714	6.87414	3.92111	2.50339	4.69197	2.9879	2.10071	9.56281	7.4534	6.36066	1.80819	1.56301	1.44166	29.5592	5.68927	4.43288	3.26019	7.79229	1.60429
500	27	0	3	1	0	0	0	0	0	1	0	1	2950	1	36.2876	27.7784	24.3837	6.43249	5.67818	4.85788	6.87414	3.92111	2.43746	4.69197	2.9879	2.03808	9.56281	7.4534	6.32443	1.80819	1.56301	1.41545	29.4832	5.65618	4.41091	3.23932	7.78021	1.59555
501	34	0	1	1	0	0	1	0	0	0	0	2	3000	1	36.2876	27.7784	25.0517	6.43249	5.67818	5.01055	6.87414	3.92111	2.561	4.69197	2.9879	2.12493	9.56281	7.4534	6.51975	1.80819	1.56301	1.46113	29.7059	5.70707	4.45209	3.26827	7.84532	1.61078
502	34	0	3	1	0	0	0	0	0	0	0	2	3300	0	36.2876	27.7784	24.8361	6.43249	5.67818	4.96325	6.87414	3.92111	2.52213	4.69197	2.9879	2.09811	9.56281	7.4534	6.45811	1.80819	1.56301	1.44764	29.634	5.69131	4.43913	3.25933	7.82477	1.60628
503	21	0	3	1	0	0	1	0	0	0	0	1	3350	1	36.4097	28.4437	22.9206	6.45548	5.81663	4.56183	6.89609	4.05358	2.18167	4.70441	3.08636	1.84106	9.60726	7.61456	5.9447	1.81476	1.59673	1.33546	29.258	5.61131	4.37711	3.21061	7.72218	1.58232
504	21	0	3	3	0	0	1	0	0	0	0	1	2700	0	36.4097	28.4437	23.3288	6.45548	5.81663	4.64114	6.89609	4.05358	2.23063	4.70441	3.08636	1.88468	9.60726	7.61456	6.04782	1.81476	1.59673	1.36049	29.3941	5.63775	4.39343	3.22515	7.75655	1.59066
505	24	0	3	1	0	0	1	0	0	0	0	2	3000	1	36.4097	28.4437	22.9987	6.45548	5.81663	4.5758	6.89609	4.05358	2.19187	4.70441	3.08636	1.85242	9.60726	7.61456	5.96053	1.81476	1.59673	1.34128	29.284	5.61597	4.38051	3.2144	7.72745	1.58426
506	24	0	1	1	0	0	1	0	0	0	0	2	2550	0	36.4097	28.4437	23.7149	6.45548	5.81663	4.73576	6.89609	4.05358	2.29455	4.70441	3.08636	1.93377	9.60726	7.61456	6.15648	1.81476	1.59673	1.3904	29.5228	5.66929	4.41474	3.24151	7.79277	1.60063
507	26	0	3	1	0	0	1	0	0	0	0	1	3300	1	36.6176	28.6076	23.3576	6.5036	5.86644	4.6453	6.96449	4.04122	2.24972	4.75251	3.0868	1.89567	9.66611	7.67378	6.04397	1.83022	1.6091	1.37078	29.5276	5.67178	4.41848	3.24499	7.79462	1.60337
508	26	0	1	3	0	0	1	0	0	0	0	1	3250	0	36.6176	28.6076	23.1192	6.5036	5.86644	4.59328	6.96449	4.04122	2.20082	4.75251	3.0868	1.86317	9.66611	7.67378	5.97219	1.83022	1.6091	1.35303	29.4481	5.65444	4.40218	3.23416	7.7707	1.59745
509	29	0	1	3	0	0	1	0	0	0	0	1	2600	1	36.9849	28.2612	22.6182	6.57793	5.79169	4.48629	7.0007	3.97327	2.1426	4.76035	3.05595	1.81256	9.7677	7.54854	5.84684	1.85574	1.58954	1.31923	29.2881	5.61864	4.37219	3.20962	7.72103	1.58817
510	29	0	1	2	0	0	0	0	0	0	0	1	2700	0	36.9849	28.2612	22.3704	6.57793	5.79169	4.45143	7.0007	3.97327	2.10674	4.76035	3.05595	1.77606	9.7677	7.54854	5.79791	1.85574	1.58954	1.30388	29.2055	5.60702	4.36024	3.19745	7.70471	1.58305
511	24	0	1	3	0	0	1	0	0	0	0	2	3200	1	36.8974	28.2686	22.3093	6.55636	5.79279	4.42094	6.98988	3.96763	2.11292	4.74876	3.05488	1.7879	9.74293	7.54143	5.76618	1.84834	1.58958	1.30144	29.1584	5.59003	4.35681	3.19718	7.68351	1.57979
512	24	0	3	2	0	0	1	0	0	1	0	1	3200	0	36.8974	28.2686	22.169	6.55636	5.79279	4.39654	6.98988	3.96763	2.09511	4.74876	3.05488	1.77185	9.74293	7.54143	5.73348	1.84834	1.58958	1.29309	29.1117	5.5819	4.35087	3.19183	7.67261	1.577
513	27	0	1	1	0	0	1	0	0	1	0	1	3450	1	36.8974	28.2686	22.9213	6.55636	5.79279	4.55682	6.98988	3.96763	2.19069	4.74876	3.05488	1.84746	9.74293	7.54143	5.93909	1.84834	1.58958	1.34117	29.3624	5.63532	4.38273	3.21704	7.74115	1.59303
514	27	0	1	1	0	0	1	0	1	0	0	1	3500	0	36.8974	28.2686	22.3093	6.55636	5.79279	4.42094	6.98988	3.96763	2.11292	4.74876	3.05488	1.7879	9.74293	7.54143	5.76618	1.84834	1.58958	1.30144	29.1584	5.59003	4.35681	3.19718	7.68351	1.57979
515	25	0	1	3	0	0	1	0	0	0	0	1	2500	1	36.8137	28.3957	22.4928	6.54538	5.82168	4.48083	6.98722	3.97336	2.12548	4.74631	3.06162	1.78085	9.71993	7.57263	5.85409	1.84482	1.5967	1.30831	29.2341	5.61597	4.36202	3.19626	7.71555	1.58327
516	25	0	3	3	0	0	1	0	0	0	0	2	3250	0	36.8137	28.3957	22.3234	6.54538	5.82168	4.43882	6.98722	3.97336	2.10893	4.74631	3.06162	1.77389	9.71993	7.57263	5.79689	1.84482	1.5967	1.30158	29.1776	5.60196	4.3565	3.19394	7.69648	1.58103
517	28	0	3	3	0	1	0	1	0	0	0	1	3150	1	36.8137	28.3957	22.1336	6.54538	5.82168	4.39807	6.98722	3.97336	2.09477	4.74631	3.06162	1.76711	9.71993	7.57263	5.73289	1.84482	1.5967	1.29254	29.1143	5.58838	4.35178	3.19168	7.67515	1.57802
518	28	0	2	2	0	0	0	0	0	0	0	2	2700	0	36.8137	28.3957	22.3902	6.54538	5.82168	4.45492	6.98722	3.97336	2.11595	4.74631	3.06162	1.77803	9.71993	7.57263	5.81505	1.84482	1.5967	1.30325	29.1999	5.60733	4.35884	3.19532	7.70254	1.58159
519	30	0	3	2	0	1	0	1	0	1	0	2	3500	1	36.8137	28.3957	22.8057	6.54538	5.82168	4.52412	6.98722	3.97336	2.17844	4.74631	3.06162	1.84059	9.71993	7.57263	5.90486	1.84482	1.5967	1.33406	29.3384	5.63039	4.37967	3.21617	7.73248	1.59186
520	30	0	1	2	0	0	1	0	0	0	0	1	3400	0	36.8137	28.3957	22.2508	6.54538	5.82168	4.40612	6.98722	3.97336	2.11064	4.74631	3.06162	1.78685	9.71993	7.57263	5.75097	1.84482	1.5967	1.29904	29.1534	5.59106	4.35707	3.19826	7.68118	1.58019
521	32	0	3	3	0	0	1	0	1	0	0	1	3300	1	36.1633	28.576	22.2831	6.43528	5.86251	4.41711	6.93286	3.97354	2.11218	4.70847	3.06815	1.78557	9.5185	7.6251	5.7622	1.80767	1.60873	1.30026	29.0075	5.57163	4.33953	3.1874	7.63527	1.57222
522	32	0	3	3	0	0	0	0	1	0	0	1	3350	0	36.1633	28.576	22.6981	6.43528	5.86251	4.49629	6.93286	3.97354	2.16243	4.70847	3.06815	1.83079	9.5185	7.6251	5.86553	1.80767	1.60873	1.32598	29.1458	5.59802	4.35628	3.20247	7.66971	1.58079
523	29	0	3	4	0	0	1	0	0	0	0	1	3700	1	35.9029	28.6329	22.8355	6.38428	5.89252	4.51167	6.89904	3.97724	2.16183	4.68639	3.07913	1.82737	9.45211	7.6369	5.89116	1.79527	1.61127	1.33447	29.1238	5.59616	4.34604	3.19763	7.66006	1.58034
524	29	0	3	2	0	0	1	0	0	0	0	2	2700	0	35.9029	28.6329	22.3934	6.38428	5.89252	4.43853	6.89904	3.97724	2.10086	4.68639	3.07913	1.76552	9.45211	7.6369	5.80288	1.79527	1.61127	1.30495	28.9764	5.57178	4.32571	3.17701	7.63063	1.57049
525	31	0	1	3	0	0	0	0	0	1	0	1	3600	1	35.9029	28.6329	22.3934	6.38428	5.89252	4.43853	6.89904	3.97724	2.10086	4.68639	3.07913	1.76552	9.45211	7.6369	5.80288	1.79527	1.61127	1.30495	28.9764	5.57178	4.32571	3.17701	7.63063	1.57049
526	31	0	3	3	0	0	0	0	0	0	0	2	3100	0	35.9029	28.6329	22.9206	6.38428	5.89252	4.56904	6.89904	3.97724	2.16107	4.68639	3.07913	1.7965	9.45211	7.6369	5.9775	1.79527	1.61127	1.3333	29.1521	5.61528	4.34578	3.18734	7.68884	1.57994
527	25	0	1	1	0	0	0	0	0	0	0	2	2700	1	35.9042	28.5694	22.6468	6.36617	5.90357	4.45966	6.93263	3.92078	2.1373	4.70405	3.04737	1.80685	9.43645	7.63786	5.82853	1.78969	1.6164	1.31946	29.0401	5.57646	4.33024	3.18609	7.63428	1.57518
528	25	0	3	3	0	0	0	0	0	0	0	2	3200	0	35.9042	28.5694	22.0953	6.36617	5.90357	4.36601	6.93263	3.92078	2.06417	4.70405	3.04737	1.74105	9.43645	7.63786	5.69854	1.78969	1.6164	1.2848	28.8563	5.54525	4.30586	3.16416	7.59095	1.56363
529	31	0	3	2	0	0	1	0	0	0	0	2	2950	1	35.9042	28.5694	22.0953	6.36617	5.90357	4.36601	6.93263	3.92078	2.06417	4.70405	3.04737	1.74105	9.43645	7.63786	5.69854	1.78969	1.6164	1.2848	28.8563	5.54525	4.30586	3.16416	7.59095	1.56363
530	31	0	3	1	0	1	1	1	1	0	0	2	2800	0	35.9042	28.5694	22.5768	6.36617	5.90357	4.44455	6.93263	3.92078	2.12737	4.70405	3.04737	1.80072	9.43645	7.63786	5.80403	1.78969	1.6164	1.31475	29.0168	5.57143	4.32693	3.18405	7.62611	1.57361
531	33	0	3	3	0	0	1	0	0	0	0	2	3200	1	35.9042	28.5694	22.357	6.36617	5.90357	4.42267	6.93263	3.92078	2.09031	4.70405	3.04737	1.75357	9.43645	7.63786	5.78538	1.78969	1.6164	1.29513	28.9435	5.56413	4.31458	3.16833	7.6199	1.56707
532	33	0	1	2	0	1	1	0	0	0	0	1	3160	0	35.9042	28.5694	22.8118	6.36617	5.90357	4.54328	6.93263	3.92078	2.14197	4.70405	3.04737	1.77962	9.43645	7.63786	5.94376	1.78969	1.6164	1.32425	29.0951	5.60434	4.3318	3.17701	7.67269	1.57678
533	35	0	3	2	0	1	1	1	0	0	0	1	3400	0	35.9042	28.5694	22.3659	6.36617	5.90357	4.43731	6.93263	3.92078	2.09035	4.70405	3.04737	1.74948	9.43645	7.63786	5.7984	1.78969	1.6164	1.2969	28.9465	5.56901	4.31459	3.16697	7.62424	1.56766
534	35	0	3	3	0	1	1	1	1	0	0	1	3250	1	35.9042	28.5694	22.3659	6.36617	5.90357	4.43731	6.93263	3.92078	2.09035	4.70405	3.04737	1.74948	9.43645	7.63786	5.7984	1.78969	1.6164	1.2969	28.9465	5.56901	4.31459	3.16697	7.62424	1.56766
535	26	0	1	1	0	0	1	0	0	0	0	2	3400	1	35.9261	28.4517	21.9168	6.36988	5.88696	4.31744	6.92408	3.89008	2.03971	4.69443	3.02974	1.72072	9.45572	7.605	5.6374	1.79454	1.61083	1.27407	28.7648	5.52476	4.28462	3.1483	7.56604	1.55981
536	26	0	1	3	0	0	1	0	1	0	0	1	3300	0	35.9261	28.4517	22.3327	6.36988	5.88696	4.42267	6.92408	3.89008	2.07749	4.69443	3.02974	1.73784	9.45572	7.605	5.78243	1.79454	1.61083	1.29398	28.9035	5.55984	4.29722	3.154	7.61439	1.56645
537	28	0	1	1	0	0	1	0	0	0	0	1	2650	1	35.9261	28.4517	22.1983	6.36988	5.88696	4.38103	6.92408	3.89008	2.06437	4.69443	3.02974	1.73413	9.45572	7.605	5.7285	1.79454	1.61083	1.28618	28.8587	5.54596	4.29284	3.15276	7.59641	1.56385
538	28	0	3	1	0	0	1	0	1	1	0	2	2700	0	35.9261	28.4517	21.9168	6.36988	5.88696	4.31744	6.92408	3.89008	2.03971	4.69443	3.02974	1.72072	9.45572	7.605	5.6374	1.79454	1.61083	1.27407	28.7648	5.52476	4.28462	3.1483	7.56604	1.55981
539	29	0	1	3	0	0	1	0	0	0	0	1	3600	1	35.9261	28.4517	22.1983	6.36988	5.88696	4.38103	6.92408	3.89008	2.06437	4.69443	3.02974	1.73413	9.45572	7.605	5.7285	1.79454	1.61083	1.28618	28.8587	5.54596	4.29284	3.15276	7.59641	1.56385
540	29	0	1	3	0	0	1	0	0	0	0	1	2650	0	35.9261	28.4517	21.8859	6.36988	5.88696	4.29782	6.92408	3.89008	2.03596	4.69443	3.02974	1.72321	9.45572	7.605	5.61914	1.79454	1.61083	1.27154	28.7545	5.51822	4.28337	3.14912	7.55996	1.55897
541	26	0	3	1	0	0	0	0	0	0	0	1	2880	1	35.7141	28.1537	22.1452	6.2988	5.85165	4.35461	6.95593	3.78323	2.05808	4.70475	2.96549	1.73653	9.36317	7.54325	5.69261	1.77493	1.60353	1.28172	28.671	5.50168	4.26575	3.13559	7.53301	1.55339
542	26	1	3	3	1	0	0	0	0	0	0	2	3500	0	35.7141	28.1537	22.0031	6.2988	5.85165	4.32177	6.95593	3.78323	2.0475	4.70475	2.96549	1.72862	9.36317	7.54325	5.64881	1.77493	1.60353	1.27406	28.6236	5.49074	4.26222	3.13295	7.51841	1.55084
543	29	0	1	3	0	0	0	0	0	0	0	1	3500	1	35.4263	28.1471	22.8858	6.23595	5.85287	4.53938	6.92974	3.77139	2.13926	4.68562	2.96011	1.77414	9.29472	7.53552	5.95199	1.75827	1.60426	1.32128	28.8197	5.54273	4.28013	3.13996	7.59408	1.56127
544	29	0	1	2	0	0	0	0	0	0	0	1	3350	0	35.4263	28.1471	22.0856	6.23595	5.85287	4.32535	6.92974	3.77139	2.0557	4.68562	2.96011	1.73646	9.29472	7.53552	5.66655	1.75827	1.60426	1.27673	28.553	5.47139	4.25228	3.1274	7.49893	1.54642
545	24	0	3	3	0	0	1	0	0	0	0	1	3150	1	35.1793	28.1654	22.9584	6.17955	5.85471	4.55085	6.89887	3.7688	2.15282	4.65937	2.95982	1.7809	9.23548	7.53848	5.97307	1.74307	1.60478	1.32317	28.7677	5.52837	4.2735	3.13337	7.58234	1.55701
546	24	0	1	3	0	0	0	0	1	0	0	2	3050	0	35.1793	28.1654	22.1736	6.17955	5.85471	4.34224	6.89887	3.7688	2.06647	4.65937	2.95982	1.74448	9.23548	7.53848	5.69132	1.74307	1.60478	1.28205	28.5061	5.45883	4.24471	3.12122	7.48843	1.5433
547	24	0	1	1	0	1	1	0	0	0	0	1	3360	1	35.1793	28.1654	22.1951	6.17955	5.85471	4.35677	6.89887	3.7688	2.06904	4.65937	2.95982	1.74347	9.23548	7.53848	5.7042	1.74307	1.60478	1.2847	28.5133	5.46368	4.24557	3.12089	7.49272	1.54419
548	24	0	3	2	0	0	1	0	0	0	0	1	2900	0	35.1793	28.1654	23.1034	6.17955	5.85471	4.57681	6.89887	3.7688	2.16667	4.65937	2.95982	1.78971	9.23548	7.53848	6.01815	1.74307	1.60478	1.33155	28.816	5.53702	4.27811	3.1363	7.59737	1.5598
549	26	0	3	2	0	1	0	0	0	0	0	1	2850	1	35.1793	28.1654	23.1034	6.17955	5.85471	4.57681	6.89887	3.7688	2.16667	4.65937	2.95982	1.78971	9.23548	7.53848	6.01815	1.74307	1.60478	1.33155	28.816	5.53702	4.27811	3.1363	7.59737	1.5598
550	26	0	3	2	0	1	0	1	0	0	0	2	2750	0	35.1793	28.1654	22.6945	6.17955	5.85471	4.48314	6.89887	3.7688	2.1146	4.65937	2.95982	1.76375	9.23548	7.53848	5.8806	1.74307	1.60478	1.30979	28.6797	5.5058	4.26076	3.12765	7.55152	1.55255
551	24	0	1	2	0	0	1	0	0	0	0	1	3200	1	35.1825	27.9222	22.5183	6.17911	5.80011	4.421	6.88845	3.74397	2.09272	4.6568	2.93738	1.76146	9.21048	7.48022	5.80281	1.74389	1.58811	1.30376	28.541	5.46674	4.24172	3.11855	7.49784	1.54525
552	24	0	3	3	0	0	1	0	0	0	0	1	2150	0	35.1825	27.9222	23.7446	6.17911	5.80011	4.69239	6.88845	3.74397	2.28081	4.6568	2.93738	1.86752	9.21048	7.48022	6.20464	1.74389	1.58811	1.3669	28.9498	5.5572	4.30441	3.1539	7.63178	1.5663
553	25	0	3	3	0	0	0	0	0	0	0	1	2850	1	34.9099	28.0662	22.3959	6.12186	5.81847	4.40465	6.86505	3.76721	2.06596	4.64004	2.9489	1.74734	9.13014	7.52193	5.77052	1.72783	1.59403	1.29832	28.4573	5.44833	4.23274	3.11209	7.4742	1.54006
554	25	0	1	3	0	0	0	0	0	0	0	1	3600	0	34.9099	28.0662	23.1053	6.12186	5.81847	4.58448	6.86505	3.76721	2.14464	4.64004	2.9489	1.78404	9.13014	7.52193	6.02002	1.72783	1.59403	1.33638	28.6938	5.50827	4.25897	3.12433	7.55736	1.55274
555	30	0	3	2	0	0	0	0	0	0	0	2	3100	1	34.9099	28.0662	22.6755	6.12186	5.81847	4.48105	6.86505	3.76721	2.09485	4.64004	2.9489	1.75626	9.13014	7.52193	5.87631	1.72783	1.59403	1.31082	28.5505	5.47379	4.24237	3.11507	7.50946	1.54422
556	30	0	1	1	0	0	0	0	0	0	0	1	3400	0	34.9099	28.0662	23.1513	6.12186	5.81847	4.59564	6.86505	3.76721	2.15153	4.64004	2.9489	1.78914	9.13014	7.52193	6.03259	1.72783	1.59403	1.34025	28.7091	5.51199	4.26126	3.12603	7.56155	1.55404
557	32	0	1	3	0	0	1	0	1	1	0	1	2900	1	34.9005	28.0686	23.1407	6.12325	5.81458	4.5965	6.90039	3.73115	2.15278	4.66564	2.92208	1.78877	9.12312	7.52805	6.03529	1.72264	1.59826	1.33974	28.7033	5.51144	4.26144	3.1255	7.56215	1.55355
558	32	0	1	2	0	0	0	0	1	0	0	1	3250	0	34.9005	28.0686	22.656	6.12325	5.81458	4.4651	6.90039	3.73115	2.09548	4.66564	2.92208	1.7602	9.12312	7.52805	5.86457	1.72264	1.59826	1.30823	28.5417	5.46764	4.24234	3.11597	7.50525	1.54305
559	23	1	1	1	0	0	1	0	0	0	0	2	3200	1	34.7669	28.24	22.632	6.10429	5.84676	4.46598	6.88234	3.74356	2.09159	4.65336	2.93389	1.75254	9.09804	7.56807	5.87186	1.71714	1.60827	1.30722	28.5463	5.47234	4.23916	3.11326	7.51266	1.54421
560	23	0	1	2	1	0	1	0	0	0	0	2	2850	0	34.7669	28.24	23.0346	6.10429	5.84676	4.56654	6.88234	3.74356	2.14205	4.65336	2.93389	1.78053	9.09804	7.56807	6.00382	1.71714	1.60827	1.33213	28.6805	5.50586	4.25598	3.12259	7.55664	1.55251
561	35	0	3	1	0	0	1	0	0	0	0	1	3100	1	34.7669	28.24	23.702	6.10429	5.84676	4.70353	6.88234	3.74356	2.28044	4.65336	2.93389	1.87022	9.09804	7.56807	6.2126	1.71714	1.60827	1.36611	28.903	5.55153	4.30211	3.15249	7.62623	1.56384
562	35	0	3	3	0	1	1	1	1	1	0	1	3650	0	34.7669	28.24	23.0207	6.10429	5.84676	4.57018	6.88234	3.74356	2.14567	4.65336	2.93389	1.77726	9.09804	7.56807	6.00751	1.71714	1.60827	1.32962	28.6758	5.50708	4.25719	3.1215	7.55787	1.55168
563	36	0	3	1	0	1	1	0	0	0	0	2	3200	1	34.5594	28.4112	22.5433	6.05954	5.88126	4.44137	6.84976	3.76046	2.08036	4.62952	2.94917	1.74853	9.05469	7.60809	5.83865	1.70703	1.61918	1.30182	28.5046	5.46072	4.23019	3.10907	7.50048	1.54268
564	36	0	1	1	0	1	1	0	1	1	0	2	3500	0	34.5594	28.4112	23.1766	6.05954	5.88126	4.60522	6.84976	3.76046	2.15361	4.62952	2.94917	1.78658	9.05469	7.60809	6.05702	1.70703	1.61918	1.34072	28.7157	5.51534	4.25461	3.12175	7.57327	1.55565
565	29	0	3	2	0	0	0	0	0	0	0	2	2600	0	34.6198	28.339	23.3317	6.07262	5.86753	4.62638	6.87055	3.72608	2.1704	4.64512	2.92742	1.79117	9.0646	7.5988	6.10778	1.70781	1.62054	1.34442	28.7635	5.52218	4.25568	3.12124	7.59039	1.55759
566	29	0	3	1	0	0	1	0	0	0	0	1	3600	1	34.6198	28.339	23.1947	6.07262	5.86753	4.60583	6.87055	3.72608	2.15163	4.64512	2.92742	1.7821	9.0646	7.5988	6.06563	1.70781	1.62054	1.3392	28.7178	5.51533	4.24942	3.11821	7.57634	1.55585
567	31	0	3	1	0	0	1	0	0	1	0	2	3000	1	35.0748	27.84	23.5981	6.16382	5.75365	4.70197	6.96963	3.57762	2.28841	4.71037	2.83603	1.86962	9.16729	7.4716	6.20234	1.73231	1.59481	1.36188	28.8376	5.53981	4.27855	3.13867	7.61374	1.563
568	31	0	1	3	0	0	1	0	1	0	0	1	3250	0	35.0748	27.84	23.1216	6.16382	5.75365	4.60025	6.96963	3.57762	2.15946	4.71037	2.83603	1.78384	9.16729	7.4716	6.05224	1.73231	1.59481	1.33803	28.6788	5.50591	4.23557	3.11008	7.56371	1.55505
569	27	0	1	3	0	0	0	0	0	0	0	2	2500	1	35.1147	27.6546	23.629	6.17391	5.71384	4.71688	6.93764	3.54034	2.2993	4.69396	2.81215	1.87794	9.18666	7.41574	6.2273	1.74156	1.58327	1.36877	28.7994	5.53488	4.25909	3.12801	7.6099	1.56453
570	27	0	1	2	0	1	1	1	0	0	0	2	2900	0	35.1147	27.6546	23.7679	6.17391	5.71384	4.73434	6.93764	3.54034	2.30013	4.69396	2.81215	1.87521	9.18666	7.41574	6.25215	1.74156	1.58327	1.37279	28.8457	5.5407	4.25937	3.1271	7.61818	1.56587
571	34	0	3	2	0	1	0	1	0	0	0	1	3350	1	35.1147	27.6546	23.871	6.17391	5.71384	4.76201	6.93764	3.54034	2.30801	4.69396	2.81215	1.88671	9.18666	7.41574	6.28053	1.74156	1.58327	1.38112	28.8801	5.54992	4.26199	3.13094	7.62764	1.56865
572	34	0	3	3	0	0	0	0	0	0	0	1	2850	0	35.1147	27.6546	23.9977	6.17391	5.71384	4.77932	6.93764	3.54034	2.32691	4.69396	2.81215	1.89531	9.18666	7.41574	6.31496	1.74156	1.58327	1.38687	28.9224	5.55569	4.26829	3.1338	7.63912	1.57057
573	22	0	1	2	0	1	1	0	0	0	0	2	2950	1	34.9113	27.4672	23.3832	6.16745	5.66646	4.66241	6.81257	3.51363	2.19409	4.62716	2.79482	1.79822	9.14123	7.34962	6.15732	1.74438	1.57023	1.3524	28.5872	5.49877	4.17343	3.0734	7.54939	1.55567
574	22	0	1	2	0	0	1	0	0	0	0	2	2800	0	34.9113	27.4672	23.2283	6.16745	5.66646	4.63549	6.81257	3.51363	2.18102	4.62716	2.79482	1.79061	9.14123	7.34962	6.10813	1.74438	1.57023	1.34466	28.5356	5.4898	4.16907	3.07086	7.53299	1.55309
575	25	0	3	3	0	0	0	0	0	0	0	1	2250	1	34.9113	27.4672	24.0355	6.16745	5.66646	4.79358	6.81257	3.51363	2.33316	4.62716	2.79482	1.89704	9.14123	7.34962	6.33986	1.74438	1.57023	1.38999	28.8047	5.5425	4.21979	3.10634	7.61024	1.5682
576	25	0	1	3	0	0	0	0	0	0	0	2	3650	0	34.9113	27.4672	23.2283	6.16745	5.66646	4.63549	6.81257	3.51363	2.18102	4.62716	2.79482	1.79061	9.14123	7.34962	6.10813	1.74438	1.57023	1.34466	28.5356	5.4898	4.16907	3.07086	7.53299	1.55309
577	26	0	1	3	0	0	1	0	0	0	0	1	3100	1	34.9113	27.4672	23.9456	6.16745	5.66646	4.77401	6.81257	3.51363	2.32334	4.62716	2.79482	1.88962	9.14123	7.34962	6.32115	1.74438	1.57023	1.38278	28.7747	5.53597	4.21651	3.10387	7.604	1.5658
578	26	1	3	3	0	0	1	0	0	0	0	2	3150	0	34.9113	27.4672	23.8028	6.16745	5.66646	4.7452	6.81257	3.51363	2.30756	4.62716	2.79482	1.87882	9.14123	7.34962	6.27164	1.74438	1.57023	1.37578	28.7271	5.52637	4.21125	3.10027	7.5875	1.56346
579	27	0	1	2	0	0	0	0	0	0	0	1	3550	1	34.5184	27.3032	23.8942	6.11501	5.62113	4.77534	6.64308	3.49467	2.33226	4.52262	2.78372	1.89528	9.07246	7.28659	6.31402	1.73828	1.55876	1.38197	28.5719	5.50383	4.15667	3.0672	7.55769	1.55967
580	27	0	3	1	0	0	0	0	0	0	0	2	3700	0	34.5184	27.3032	24.2312	6.11501	5.62113	4.8376	6.64308	3.49467	2.36195	4.52262	2.78372	1.91526	9.07246	7.28659	6.40301	1.73828	1.55876	1.40252	28.6843	5.52458	4.16657	3.07386	7.58735	1.56652
581	28	0	3	3	0	0	1	0	0	0	0	1	3100	1	34.5184	27.3032	24.2275	6.11501	5.62113	4.83954	6.64308	3.49467	2.35979	4.52262	2.78372	1.91275	9.07246	7.28659	6.40621	1.73828	1.55876	1.40222	28.683	5.52523	4.16585	3.07303	7.58842	1.56642
582	28	0	1	4	0	0	0	0	0	0	0	1	3600	0	34.5184	27.3032	23.4246	6.11501	5.62113	4.68347	6.64308	3.49467	2.20712	4.52262	2.78372	1.80554	9.07246	7.28659	6.17729	1.73828	1.55876	1.35734	28.4154	5.4732	4.11496	3.03729	7.51211	1.55146
583	32	0	3	2	0	0	1	0	1	0	0	2	2800	1	34.5184	27.3032	23.8223	6.11501	5.62113	4.74818	6.64308	3.49467	2.27329	4.52262	2.78372	1.84625	9.07246	7.28659	6.28824	1.73828	1.55876	1.37764	28.548	5.49477	4.13702	3.05086	7.5491	1.55823
584	32	0	2	3	0	0	0	0	0	0	0	1	3300	0	34.5184	27.3032	23.8357	6.11501	5.62113	4.76953	6.64308	3.49467	2.33131	4.52262	2.78372	1.8961	9.07246	7.28659	6.30708	1.73828	1.55876	1.38287	28.5524	5.50189	4.15635	3.06748	7.55538	1.55997
585	33	0	3	3	0	0	1	0	0	0	0	2	2950	1	34.5184	27.3032	23.8223	6.11501	5.62113	4.74818	6.64308	3.49467	2.27329	4.52262	2.78372	1.84625	9.07246	7.28659	6.28824	1.73828	1.55876	1.37764	28.548	5.49477	4.13702	3.05086	7.5491	1.55823
586	33	0	1	3	0	1	0	1	0	0	0	2	3800	0	34.5184	27.3032	23.7309	6.11501	5.62113	4.76083	6.64308	3.49467	2.32586	4.52262	2.78372	1.89102	9.07246	7.28659	6.28934	1.73828	1.55876	1.3825	28.5175	5.49899	4.15454	3.06578	7.54946	1.55985
587	25	0	1	1	0	0	1	0	0	0	0	2	2600	1	34.1961	27.3036	23.8252	6.06945	5.61745	4.74233	6.55077	3.48305	2.27623	4.47165	2.77315	1.84622	9.0087	7.28013	6.2912	1.72804	1.55926	1.37597	28.4416	5.47641	4.10335	3.03034	7.52668	1.55443
588	25	0	1	3	0	0	1	0	0	0	0	2	2900	0	34.1961	27.3036	24.1145	6.06945	5.61745	4.79849	6.55077	3.48305	2.33771	4.47165	2.77315	1.89139	9.0087	7.28013	6.37807	1.72804	1.55926	1.3912	28.5381	5.49513	4.12384	3.0454	7.55564	1.5595
589	25	0	1	4	0	0	0	0	0	0	0	1	3150	1	33.8717	27.5131	23.5274	6.02901	5.65021	4.71779	6.45147	3.49943	2.31275	4.4113	2.78426	1.87844	8.93705	7.32611	6.24435	1.7197	1.56717	1.369	28.3041	5.46567	4.08788	3.02467	7.5025	1.55196
590	25	0	3	1	0	0	1	0	0	0	0	2	3450	0	33.8717	27.5131	23.8877	6.02901	5.65021	4.7744	6.45147	3.49943	2.32875	4.4113	2.78426	1.89311	8.93705	7.32611	6.32078	1.7197	1.56717	1.38222	28.4242	5.48454	4.09322	3.02956	7.52798	1.55636
591	24	0	1	3	0	0	1	0	0	0	0	2	3850	1	33.349	27.8361	23.6922	5.95031	5.70275	4.75039	6.33948	3.53174	2.30866	4.34051	2.80711	1.88112	8.79981	7.41184	6.27056	1.69297	1.58494	1.37191	28.2924	5.46782	4.05996	3.00958	7.49407	1.54994
592	24	0	1	1	0	0	0	0	1	0	0	1	3000	0	33.349	27.8361	23.3241	5.95031	5.70275	4.69315	6.33948	3.53174	2.28649	4.34051	2.80711	1.8604	8.79981	7.41184	6.19208	1.69297	1.58494	1.35843	28.1697	5.44874	4.05257	3.00268	7.46791	1.54545
593	27	0	1	3	0	0	0	0	0	0	0	1	3600	1	33.349	27.8361	23.3241	5.95031	5.70275	4.69315	6.33948	3.53174	2.28649	4.34051	2.80711	1.8604	8.79981	7.41184	6.19208	1.69297	1.58494	1.35843	28.1697	5.44874	4.05257	3.00268	7.46791	1.54545
594	27	0	1	3	0	1	0	0	0	0	0	1	2900	0	33.349	27.8361	23.3331	5.95031	5.70275	4.69636	6.33948	3.53174	2.29054	4.34051	2.80711	1.86412	8.79981	7.41184	6.19584	1.69297	1.58494	1.36034	28.1727	5.44981	4.05392	3.00391	7.46916	1.54608
595	30	0	1	3	0	0	1	0	0	0	0	2	3250	1	33.0389	28.1545	23.5465	5.9062	5.7603	4.71923	6.2777	3.55552	2.30225	4.30154	2.82625	1.86969	8.71477	7.49601	6.23347	1.67663	1.60263	1.36168	28.2466	5.46191	4.04515	2.99916	7.48142	1.54698
596	30	0	1	1	0	0	1	0	1	0	0	2	2850	0	33.0389	28.1545	23.421	5.9062	5.7603	4.69377	6.2777	3.55552	2.28981	4.30154	2.82625	1.86038	8.71477	7.49601	6.19916	1.67663	1.60263	1.35421	28.2048	5.45343	4.04101	2.99606	7.46998	1.54449
597	30	0	3	2	0	0	1	0	0	0	0	2	3150	1	32.5989	28.3172	23.5336	5.83308	5.79968	4.70665	6.19215	3.57713	2.29175	4.2429	2.84671	1.85643	8.59065	7.55418	6.21706	1.6538	1.61403	1.35775	28.1499	5.44647	4.02034	2.98201	7.45397	1.54186
598	30	0	1	2	0	0	0	0	0	0	0	1	3450	0	32.5989	28.3172	23.3735	5.83308	5.79968	4.65502	6.19215	3.57713	2.25493	4.2429	2.84671	1.82253	8.59065	7.55418	6.17519	1.6538	1.61403	1.34714	28.0965	5.42926	4.00807	2.97071	7.44001	1.53832
599	33	0	1	1	0	0	0	0	0	1	0	2	3250	1	31.8746	28.4846	23.6911	5.71511	5.8423	4.7745	6.02847	3.60237	2.30327	4.14248	2.87055	1.86668	8.40254	7.60666	6.28467	1.61977	1.62471	1.37968	28.0167	5.44397	3.97804	2.9599	7.43129	1.54138
600	33	0	2	1	0	0	0	0	0	1	0	2	3250	0	31.8746	28.4846	23.1359	5.71511	5.8423	4.6436	6.02847	3.60237	2.25508	4.14248	2.87055	1.82587	8.40254	7.60666	6.13005	1.61977	1.62471	1.34476	27.8317	5.40034	3.96197	2.9463	7.37975	1.52974
601	27	0	3	1	0	0	1	0	0	0	0	2	2650	1	31.7761	28.5012	23.2881	5.70889	5.846	4.66953	6.03849	3.56979	2.25974	4.14827	2.84985	1.82546	8.35162	7.63747	6.17241	1.60846	1.63238	1.35112	27.8551	5.40814	3.95601	2.94119	7.38717	1.53065
602	27	0	1	3	0	0	0	0	0	0	0	2	3150	0	31.7761	28.5012	23.3551	5.70889	5.846	4.69398	6.03849	3.56979	2.26578	4.14827	2.84985	1.83085	8.35162	7.63747	6.19456	1.60846	1.63238	1.35964	27.8775	5.41629	3.95802	2.94299	7.39455	1.53349
603	30	1	3	3	0	0	1	0	0	0	0	2	3350	1	31.7761	28.5012	23.9583	5.70889	5.846	4.83444	6.03849	3.56979	2.33392	4.14827	2.84985	1.87891	8.35162	7.63747	6.35669	1.60846	1.63238	1.39483	28.0785	5.46311	3.98073	2.95901	7.4486	1.54522
604	30	0	2	3	0	0	1	0	1	0	0	2	3300	0	31.7761	28.5012	23.394	5.70889	5.846	4.66425	6.03849	3.56979	2.24897	4.14827	2.84985	1.82109	8.35162	7.63747	6.16873	1.60846	1.63238	1.35146	27.8904	5.40638	3.95242	2.93974	7.38594	1.53077
605	31	0	2	2	0	0	1	0	0	0	0	2	2950	1	31.7761	28.5012	23.394	5.70889	5.846	4.66425	6.03849	3.56979	2.24897	4.14827	2.84985	1.82109	8.35162	7.63747	6.16873	1.60846	1.63238	1.35146	27.8904	5.40638	3.95242	2.93974	7.38594	1.53077
606	31	0	1	2	0	0	0	0	0	0	0	1	3350	0	31.7761	28.5012	23.4313	5.70889	5.846	4.66382	6.03849	3.56979	2.25548	4.14827	2.84985	1.82057	8.35162	7.63747	6.17743	1.60846	1.63238	1.35123	27.9029	5.40623	3.95459	2.93956	7.38884	1.53069
607	27	0	1	1	0	0	1	0	0	0	0	2	3100	1	31.7112	28.2784	23.5738	5.69655	5.80125	4.6809	6.08794	3.49655	2.26707	4.18648	2.79428	1.82862	8.31183	7.59916	6.20803	1.599	1.6266	1.35585	27.8545	5.3929	3.95052	2.93646	7.37301	1.52715
608	27	0	1	3	0	0	0	0	0	0	0	1	3950	0	31.7112	28.2784	23.5738	5.69655	5.80125	4.6809	6.08794	3.49655	2.26707	4.18648	2.79428	1.82862	8.31183	7.59916	6.20803	1.599	1.6266	1.35585	27.8545	5.3929	3.95052	2.93646	7.37301	1.52715
609	28	0	1	4	0	0	1	0	0	0	0	2	3600	1	31.7112	28.2784	23.5368	5.69655	5.80125	4.7249	6.08794	3.49655	2.27308	4.18648	2.79428	1.84077	8.31183	7.59916	6.23019	1.599	1.6266	1.36785	27.8421	5.40757	3.95252	2.94051	7.38039	1.53115
610	28	0	2	4	0	0	1	0	1	0	0	1	2500	0	31.7112	28.2784	23.4215	5.69655	5.80125	4.65951	6.08794	3.49655	2.2444	4.18648	2.79428	1.81776	8.31183	7.59916	6.16676	1.599	1.6266	1.34877	27.8037	5.38577	3.94296	2.93284	7.35925	1.52479
611	31	0	3	3	0	0	1	0	0	0	0	2	3000	1	31.8761	27.1972	23.394	5.74071	5.56638	4.68482	6.1432	3.2546	2.27826	4.25772	2.60074	1.8359	8.39823	7.27626	6.19907	1.6152	1.56439	1.35726	27.4891	5.33064	3.89202	2.89812	7.29119	1.51228
612	31	0	1	1	0	0	0	0	1	0	0	2	3600	0	31.8761	27.1972	24.3	5.74071	5.56638	4.92867	6.1432	3.2546	2.3835	4.25772	2.60074	1.91217	8.39823	7.27626	6.46413	1.6152	1.56439	1.41518	27.7911	5.41192	3.9271	2.92354	7.37954	1.53159
613	25	0	3	3	0	0	0	0	0	0	0	1	3800	1	32.0664	27.1093	24.1215	5.77716	5.53854	4.88042	6.17327	3.2179	2.36567	4.28274	2.57559	1.89675	8.45958	7.23759	6.41887	1.62695	1.55772	1.40582	27.7657	5.39871	3.91895	2.91836	7.37201	1.53017
614	25	0	3	3	0	1	1	1	0	0	0	2	3050	0	32.0664	27.1093	23.8834	5.77716	5.53854	4.82633	6.17327	3.2179	2.32494	4.28274	2.57559	1.87138	8.45958	7.23759	6.35423	1.62695	1.55772	1.3935	27.6864	5.38068	3.90537	2.90991	7.35047	1.52606
615	34	0	3	1	0	0	1	0	0	0	0	2	3150	1	32.0664	27.1093	24.3245	5.77716	5.53854	4.94612	6.17327	3.2179	2.39342	4.28274	2.57559	1.9163	8.45958	7.23759	6.48243	1.62695	1.55772	1.4191	27.8334	5.42061	3.9282	2.92488	7.3932	1.53459
616	34	0	3	3	0	1	1	1	0	0	0	1	3300	0	32.0664	27.1093	23.2975	5.77716	5.53854	4.68861	6.17327	3.2179	2.2744	4.28274	2.57559	1.8277	8.45958	7.23759	6.19208	1.62695	1.55772	1.35677	27.4911	5.33477	3.88852	2.89535	7.29642	1.51381
617	25	0	1	3	0	0	1	0	0	0	0	1	2950	1	32.2834	26.9307	23.4059	5.81703	5.50166	4.71788	6.19361	3.1827	2.29355	4.30435	2.54886	1.84071	8.53484	7.17469	6.22875	1.64122	1.5471	1.36586	27.54	5.34552	3.88995	2.89797	7.31276	1.51806
618	25	0	1	3	0	0	0	0	0	0	0	1	3450	0	32.2834	26.9307	23.537	5.81703	5.50166	4.72613	6.19361	3.1827	2.30362	4.30435	2.54886	1.84885	8.53484	7.17469	6.25099	1.64122	1.5471	1.36495	27.5837	5.34827	3.89331	2.90068	7.32017	1.51776
619	30	0	3	1	0	0	0	0	0	0	0	2	2700	1	32.2834	26.9307	24.3361	5.81703	5.50166	4.93868	6.19361	3.1827	2.39105	4.30435	2.54886	1.91095	8.53484	7.17469	6.48685	1.64122	1.5471	1.42	27.8501	5.41912	3.92246	2.92139	7.39879	1.53611
620	30	0	3	1	0	0	1	0	0	1	0	1	2900	0	32.2834	26.9307	23.705	5.81703	5.50166	4.74784	6.19361	3.1827	2.30476	4.30435	2.54886	1.84466	8.53484	7.17469	6.2822	1.64122	1.5471	1.36978	27.6397	5.35551	3.89369	2.89929	7.33057	1.51937
621	28	0	3	3	0	0	1	0	0	0	0	2	3100	1	32.7125	26.6403	24.6107	5.89976	5.44941	5.02489	6.25543	3.12655	2.45663	4.36024	2.50139	1.97681	8.66929	7.0778	6.57181	1.66675	1.53133	1.4366	27.9878	5.45802	3.9462	2.94615	7.43963	1.54489
622	28	0	1	4	0	0	1	0	0	0	0	2	2550	0	32.7125	26.6403	23.435	5.89976	5.44941	4.72035	6.25543	3.12655	2.29616	4.36024	2.50139	1.83951	8.66929	7.0778	6.2413	1.66675	1.53133	1.36544	27.596	5.35651	3.89271	2.90038	7.32946	1.52117
623	34	0	2	2	0	0	1	0	0	0	0	2	3750	1	33.1639	26.3888	24.1516	5.97995	5.41345	4.8825	6.33812	3.05801	2.37377	4.42146	2.45695	1.89713	8.79104	7.00109	6.44885	1.69041	1.521	1.40731	27.9014	5.4253	3.9233	2.92518	7.41366	1.53957
624	34	0	3	2	0	0	0	0	1	0	0	1	3200	0	33.1639	26.3888	23.8962	5.97995	5.41345	4.82932	6.33812	3.05801	2.33584	4.42146	2.45695	1.87025	8.79104	7.00109	6.38524	1.69041	1.521	1.39448	27.8163	5.40757	3.91066	2.91622	7.39246	1.5353
625	29	1	1	3	0	0	1	0	0	0	0	1	3450	1	33.7532	26.4763	22.8069	6.11225	5.41313	4.59021	6.3982	3.00407	2.23534	4.48574	2.41088	1.79563	8.93967	7.04754	6.07242	1.72971	1.52865	1.32188	27.6788	5.37186	3.8792	2.89742	7.35321	1.52675
626	29	0	1	1	0	0	1	0	1	1	0	1	3300	0	33.7532	26.4763	23.2453	6.11225	5.41313	4.71479	6.3982	3.00407	2.27343	4.48574	2.41088	1.82842	8.93967	7.04754	6.20594	1.72971	1.52865	1.35779	27.8249	5.41339	3.8919	2.90835	7.39772	1.53872
627	31	0	2	3	0	1	0	1	0	0	0	1	3350	1	33.5846	26.4354	22.6353	6.0999	5.40744	4.57215	6.28029	3.00228	2.22252	4.42927	2.40865	1.78483	8.89022	7.03612	6.03654	1.73103	1.52725	1.32001	27.5518	5.35983	3.83503	2.87425	7.32096	1.5261
628	31	0	1	2	0	0	1	0	0	0	0	2	2950	0	33.5846	26.4354	22.7295	6.0999	5.40744	4.58188	6.28029	3.00228	2.23573	4.42927	2.40865	1.79608	8.89022	7.03612	6.05707	1.73103	1.52725	1.32315	27.5832	5.36308	3.83944	2.878	7.3278	1.52714
629	26	0	3	3	0	0	1	0	0	0	0	1	2950	1	33.6963	26.3631	23.7119	6.13298	5.38576	4.82837	6.25286	2.99375	2.34298	4.41796	2.40241	1.8716	8.92921	7.01306	6.33538	1.74262	1.521	1.38573	27.9237	5.44904	3.8632	2.89733	7.42589	1.54979
630	26	0	1	2	0	0	1	0	0	0	0	1	3700	0	33.6963	26.3631	23.6735	6.13298	5.38576	4.81218	6.25286	2.99375	2.33937	4.41796	2.40241	1.87039	8.92921	7.01306	6.32251	1.74262	1.521	1.3831	27.911	5.44364	3.862	2.89692	7.4216	1.54891
631	27	0	1	2	0	0	0	0	0	0	0	2	3150	1	33.6559	26.3984	23.7061	6.13431	5.39051	4.81728	6.24032	2.97355	2.34587	4.41304	2.3849	1.87612	8.91698	7.0329	6.33163	1.74144	1.52557	1.38537	27.9201	5.44737	3.85324	2.89136	7.42717	1.55079
632	27	0	3	2	0	0	1	0	1	0	0	2	3500	0	33.6559	26.3984	23.0146	6.13431	5.39051	4.66772	6.24032	2.97355	2.27029	4.41304	2.3849	1.82041	8.91698	7.0329	6.15212	1.74144	1.52557	1.34589	27.6896	5.39751	3.82805	2.87278	7.36733	1.53763
633	25	0	3	3	0	0	0	0	1	0	0	1	2800	0	33.3092	26.5193	23.5085	6.08905	5.41106	4.77415	6.13013	2.97516	2.33169	4.34858	2.38794	1.86739	8.82794	7.062	6.27765	1.72957	1.53289	1.37362	27.779	5.42475	3.81233	2.86797	7.3892	1.54536
634	25	0	1	3	0	0	1	0	0	0	0	2	2900	1	33.3092	26.5193	24.1164	6.08905	5.41106	4.96144	6.13013	2.97516	2.46651	4.34858	2.38794	2.00054	8.82794	7.062	6.46212	1.72957	1.53289	1.40564	27.9816	5.48718	3.85727	2.91235	7.45069	1.55604
635	26	0	1	2	0	0	1	0	0	1	0	2	2900	1	33.3092	26.5193	23.214	6.08905	5.41106	4.71353	6.13013	2.97516	2.28943	4.34858	2.38794	1.83745	8.82794	7.062	6.20398	1.72957	1.53289	1.35879	27.6808	5.40455	3.79824	2.85799	7.36464	1.54042
636	26	0	1	1	0	0	1	0	0	0	0	1	3900	0	33.3092	26.5193	23.0214	6.08905	5.41106	4.67248	6.13013	2.97516	2.2767	4.34858	2.38794	1.82246	8.82794	7.062	6.15985	1.72957	1.53289	1.34636	27.6166	5.39086	3.794	2.853	7.34993	1.53628
637	28	0	1	4	0	0	1	0	0	1	0	1	3200	1	33.3092	26.5193	22.7947	6.08905	5.41106	4.60508	6.13013	2.97516	2.25028	4.34858	2.38794	1.80146	8.82794	7.062	6.08775	1.72957	1.53289	1.32746	27.5411	5.36839	3.78519	2.84599	7.3259	1.52998
638	28	0	2	3	0	1	1	1	0	0	0	2	2900	0	33.3092	26.5193	23.5085	6.08905	5.41106	4.77415	6.13013	2.97516	2.33169	4.34858	2.38794	1.86739	8.82794	7.062	6.27765	1.72957	1.53289	1.37362	27.779	5.42475	3.81233	2.86797	7.3892	1.54536
639	29	0	1	4	0	0	0	0	0	0	0	2	3450	1	33.3092	26.5193	23.8685	6.08905	5.41106	4.8785	6.13013	2.97516	2.37534	4.34858	2.38794	1.89648	8.82794	7.062	6.38709	1.72957	1.53289	1.39617	27.899	5.45954	3.82688	2.87767	7.42568	1.55288
640	29	0	2	3	0	0	1	0	1	1	0	1	2850	0	33.3092	26.5193	23.214	6.08905	5.41106	4.71353	6.13013	2.97516	2.28943	4.34858	2.38794	1.83745	8.82794	7.062	6.20398	1.72957	1.53289	1.35879	27.6808	5.40455	3.79824	2.85799	7.36464	1.54042
641	29	0	2	3	0	0	1	0	0	0	0	2	3500	1	33.3092	26.5193	24.1617	6.08905	5.41106	4.96576	6.13013	2.97516	2.46177	4.34858	2.38794	1.99369	8.82794	7.062	6.47412	1.72957	1.53289	1.40887	27.9968	5.48862	3.85569	2.91007	7.45468	1.55711
642	29	0	3	3	0	0	1	0	0	0	0	2	3150	0	33.3092	26.5193	23.3356	6.08905	5.41106	4.73838	6.13013	2.97516	2.29693	4.34858	2.38794	1.8444	8.82794	7.062	6.23525	1.72957	1.53289	1.36554	27.7214	5.41283	3.80074	2.86031	7.37506	1.54267
643	31	0	3	2	0	0	0	0	0	0	0	1	3200	1	33.3092	26.5193	23.7215	6.08905	5.41106	4.82369	6.13013	2.97516	2.35284	4.34858	2.38794	1.87878	8.82794	7.062	6.3412	1.72957	1.53289	1.38633	27.85	5.44127	3.81938	2.87177	7.41038	1.5496
644	31	0	1	1	0	0	1	0	0	0	0	1	3650	0	33.3092	26.5193	23.7709	6.08905	5.41106	4.84655	6.13013	2.97516	2.36028	4.34858	2.38794	1.88296	8.82794	7.062	6.35783	1.72957	1.53289	1.38925	27.8665	5.44889	3.82186	2.87316	7.41592	1.55057
645	27	0	1	1	0	0	1	0	0	1	0	1	3350	1	33.1877	26.4135	24.7157	6.07175	5.39576	5.09911	6.08094	2.93245	2.57731	4.30971	2.36823	2.09111	8.78407	7.03816	6.66327	1.72378	1.53003	1.43339	28.1056	5.5222	3.86356	2.92301	7.49517	1.5624
646	27	0	1	2	0	0	1	0	0	0	0	1	2800	0	33.1877	26.4135	22.7143	6.07175	5.39576	4.60186	6.08094	2.93245	2.25611	4.30971	2.36823	1.80517	8.78407	7.03816	6.07343	1.72378	1.53003	1.32983	27.4385	5.35645	3.7565	2.8277	7.29856	1.52788
647	24	0	3	3	0	0	0	0	0	0	0	1	3000	1	33.4803	25.8788	26.9003	6.12959	5.30909	5.58873	6.14102	2.80212	2.93986	4.34242	2.2945	2.41426	8.8298	6.9175	7.33802	1.73114	1.50971	1.54942	28.7531	5.6758	3.961	3.01706	7.6951	1.59676
648	24	0	1	1	0	0	0	0	0	0	0	2	3200	0	33.4803	25.8788	23.9797	6.12959	5.30909	4.89618	6.14102	2.80212	2.38785	4.34242	2.2945	1.90066	8.8298	6.9175	6.42378	1.73114	1.50971	1.4041	27.7796	5.44495	3.777	2.84586	7.39036	1.54832
649	28	0	1	3	0	0	0	0	0	0	0	2	3650	1	33.3315	25.5768	23.4017	6.1336	5.24041	4.76125	6.08944	2.76474	2.32592	4.30978	2.27124	1.8541	8.79894	6.82101	6.28138	1.72611	1.49272	1.37061	27.4367	5.37842	3.7267	2.8117	7.30044	1.52981
650	28	0	3	4	0	1	0	0	1	0	0	1	2600	0	33.3315	25.5768	24.5278	6.1336	5.24041	5.05221	6.08944	2.76474	2.51056	4.30978	2.27124	2.027	8.79894	6.82101	6.5892	1.72611	1.49272	1.43183	27.812	5.47541	3.78825	2.86934	7.40305	1.55022
651	32	0	1	1	0	0	0	0	0	0	0	2	3350	1	33.2554	25.2238	24.6608	6.12983	5.17137	5.07723	6.06494	2.73557	2.52513	4.29753	2.25038	2.03578	8.7763	6.71379	6.63182	1.72099	1.47359	1.43899	27.7133	5.45948	3.77521	2.86123	7.37397	1.54453
652	32	0	1	1	0	0	0	0	0	0	0	1	3100	0	33.2554	25.2238	25.4278	6.12983	5.17137	5.25355	6.06494	2.73557	2.68177	4.29753	2.25038	2.17968	8.7763	6.71379	6.88244	1.72099	1.47359	1.47342	27.969	5.51825	3.82743	2.9092	7.45751	1.556
653	26	0	1	3	0	0	1	0	0	0	0	1	3450	1	33.0943	25.1108	24.7457	6.09641	5.1463	5.10025	6.04929	2.72539	2.53967	4.28577	2.24341	2.04411	8.72444	6.68226	6.6614	1.71217	1.46738	1.44417	27.6503	5.44765	3.77145	2.85776	7.35603	1.54124
654	26	0	1	3	0	0	0	0	0	0	0	2	3050	0	33.0943	25.1108	25.7989	6.09641	5.1463	5.34235	6.04929	2.72539	2.74923	4.28577	2.24341	2.24089	8.72444	6.68226	6.99987	1.71217	1.46738	1.49322	28.0013	5.52835	3.84131	2.92336	7.46886	1.55759
655	27	0	1	4	0	0	1	0	0	0	0	2	3200	1	33.0943	25.1108	24.7457	6.09641	5.1463	5.10025	6.04929	2.72539	2.53967	4.28577	2.24341	2.04411	8.72444	6.68226	6.6614	1.71217	1.46738	1.44417	27.6503	5.44765	3.77145	2.85776	7.35603	1.54124
656	27	0	1	3	0	0	1	0	0	0	0	2	3100	0	33.0943	25.1108	24.2285	6.09641	5.1463	4.93941	6.04929	2.72539	2.42163	4.28577	2.24341	1.92113	8.72444	6.68226	6.50784	1.71217	1.46738	1.41735	27.4779	5.39404	3.7321	2.81677	7.30485	1.5323
657	28	0	3	4	0	0	0	0	0	1	0	1	3800	1	33.0943	25.1108	24.3649	6.09641	5.1463	4.97712	6.04929	2.72539	2.43344	4.28577	2.24341	1.92664	8.72444	6.68226	6.54873	1.71217	1.46738	1.42585	27.5234	5.40661	3.73604	2.81861	7.31848	1.53513
658	28	0	1	3	0	0	1	0	0	0	0	1	3250	0	33.0943	25.1108	24.3681	6.09641	5.1463	4.98209	6.04929	2.72539	2.43656	4.28577	2.24341	1.92925	8.72444	6.68226	6.54998	1.71217	1.46738	1.42562	27.5244	5.40826	3.73708	2.81948	7.31889	1.53505
659	31	0	3	2	0	0	0	0	0	0	0	1	2900	1	32.9322	25.0473	24.4037	6.06795	5.12423	4.9778	6.03606	2.71013	2.44271	4.2796	2.23045	1.93408	8.67737	6.6588	6.55819	1.70409	1.46219	1.42858	27.4611	5.38999	3.72963	2.81471	7.29812	1.53162
660	31	0	1	1	0	0	1	0	1	1	0	1	2550	0	32.9322	25.0473	25.5886	6.06795	5.12423	5.29414	6.03606	2.71013	2.71009	4.2796	2.23045	2.19882	8.67737	6.6588	6.93416	1.70409	1.46219	1.48346	27.8561	5.49544	3.81876	2.90296	7.42344	1.54991
661	28	0	1	1	0	0	0	0	0	0	0	2	3500	1	32.8207	24.9882	24.6672	6.04739	5.10981	5.05424	5.98891	2.70261	2.47878	4.24646	2.22308	1.96359	8.6665	6.63937	6.63414	1.70304	1.45834	1.44475	27.492	5.40381	3.72343	2.81105	7.31334	1.53538
662	28	0	1	2	0	0	1	0	0	0	0	2	3400	0	32.8207	24.9882	24.5709	6.04739	5.10981	5.01708	5.98891	2.70261	2.46088	4.24646	2.22308	1.94729	8.6665	6.63937	6.60498	1.70304	1.45834	1.43825	27.4599	5.39142	3.71747	2.80561	7.30362	1.53321
663	26	0	1	1	0	0	1	0	0	0	0	1	2650	1	32.6373	24.8595	24.8116	6.03563	5.08196	5.05885	5.88997	2.67275	2.48874	4.20328	2.19776	1.96691	8.65792	6.60208	6.66624	1.70848	1.45522	1.44502	27.4361	5.39215	3.68382	2.78932	7.30875	1.53624
664	26	0	1	1	0	0	1	0	0	0	0	1	3600	0	32.6373	24.8595	25.0271	6.03563	5.08196	5.12859	5.88997	2.67275	2.5351	4.20328	2.19776	2.01561	8.65792	6.60208	6.72977	1.70848	1.45522	1.45954	27.5079	5.41539	3.69927	2.80555	7.32992	1.54108
665	25	0	1	1	0	0	0	0	0	1	0	1	3150	1	32.6208	24.751	25.7163	6.04462	5.05406	5.30499	5.87641	2.66071	2.70662	4.19642	2.1898	2.18227	8.65227	6.5632	6.96868	1.70946	1.4491	1.48434	27.6961	5.46789	3.74791	2.85616	7.39471	1.54763
666	25	0	3	1	0	0	0	0	1	0	0	2	2750	0	32.6208	24.751	26.5971	6.04462	5.05406	5.51011	5.87641	2.66071	2.86644	4.19642	2.1898	2.34577	8.65227	6.5632	7.23549	1.70946	1.4491	1.53047	27.9896	5.53626	3.80119	2.91066	7.48365	1.56301
667	27	0	1	2	0	0	1	0	0	0	0	1	3150	1	32.6208	24.751	24.8816	6.04462	5.05406	5.05987	5.87641	2.66071	2.49277	4.19642	2.1898	1.9687	8.65227	6.5632	6.69532	1.70946	1.4491	1.44793	27.4178	5.38618	3.67663	2.78497	7.30359	1.53549
668	27	1	2	3	0	0	1	0	0	0	0	2	3250	0	32.6208	24.751	25.1201	6.04462	5.05406	5.1493	5.87641	2.66071	2.54396	4.19642	2.1898	2.02013	8.65227	6.5632	6.76734	1.70946	1.4491	1.46407	27.4973	5.41599	3.6937	2.80212	7.3276	1.54088
669	28	0	1	3	0	0	1	0	0	0	0	1	3350	1	32.6208	24.751	24.8816	6.04462	5.05406	5.05987	5.87641	2.66071	2.49277	4.19642	2.1898	1.9687	8.65227	6.5632	6.69532	1.70946	1.4491	1.44793	27.4178	5.38618	3.67663	2.78497	7.30359	1.53549
670	28	0	3	3	0	0	1	0	0	0	0	1	3500	0	32.6208	24.751	25.2709	6.04462	5.05406	5.19875	5.87641	2.66071	2.6032	4.19642	2.1898	2.09072	8.65227	6.5632	6.81248	1.70946	1.4491	1.46766	27.5476	5.43248	3.71344	2.82565	7.34265	1.54207
671	32	0	1	2	0	0	0	0	0	0	0	2	3050	1	32.6208	24.751	27.8958	6.04462	5.05406	5.79267	5.87641	2.66071	3.07448	4.19642	2.1898	2.51501	8.65227	6.5632	7.6421	1.70946	1.4491	1.59875	28.4225	5.63045	3.87053	2.96707	7.61919	1.58577
672	32	0	1	3	0	0	1	0	1	1	0	2	2900	0	32.6208	24.751	26.969	6.04462	5.05406	5.59479	5.87641	2.66071	2.92924	4.19642	2.1898	2.40429	8.65227	6.5632	7.35031	1.70946	1.4491	1.5499	28.1136	5.56449	3.82212	2.93017	7.52193	1.56949
673	27	0	1	1	0	1	0	1	1	0	0	1	3480	1	32.6513	24.7811	26.0335	6.04806	5.05967	5.38151	5.86439	2.65867	2.7497	4.19049	2.1908	2.22994	8.67161	6.56258	7.08036	1.71476	1.45148	1.50258	27.822	5.49641	3.75758	2.87041	7.43818	1.55628
674	27	0	3	2	0	1	1	0	0	0	0	1	3000	0	32.6513	24.7811	24.8532	6.04806	5.05967	5.05965	5.86439	2.65867	2.47028	4.19049	2.1908	1.95154	8.67161	6.56258	6.70696	1.71476	1.45148	1.44761	27.4285	5.38913	3.66445	2.77761	7.31372	1.53795
675	34	0	1	3	0	1	1	1	0	0	0	1	3600	1	32.6513	24.7811	27.4322	6.04806	5.05967	5.69716	5.86439	2.65867	2.9936	4.19049	2.1908	2.45856	8.67161	6.56258	7.51431	1.71476	1.45148	1.57783	28.2882	5.60163	3.83889	2.94662	7.58283	1.58136
676	34	0	2	1	0	0	1	0	1	0	0	1	3500	0	32.6513	24.7811	26.5955	6.04806	5.05967	5.5155	5.86439	2.65867	2.85301	4.19049	2.1908	2.33666	8.67161	6.56258	7.2515	1.71476	1.45148	1.53124	28.0093	5.54108	3.79202	2.90599	7.49523	1.56583
677	27	0	3	1	0	0	0	0	0	0	0	2	3200	1	33.0102	24.4319	25.3372	6.12957	5.00184	5.21937	5.86747	2.59771	2.6126	4.20428	2.14847	2.1024	8.7941	6.45234	6.84564	1.74419	1.43528	1.46639	27.5931	5.45026	3.69259	2.81838	7.36403	1.54862
678	27	0	1	3	0	0	0	0	0	0	0	2	3300	0	33.0102	24.4319	25.3861	6.12957	5.00184	5.23391	5.86747	2.59771	2.62501	4.20428	2.14847	2.11367	8.7941	6.45234	6.8634	1.74419	1.43528	1.46647	27.6094	5.45511	3.69673	2.82214	7.36995	1.54865
679	29	0	1	1	0	0	1	0	0	0	0	2	3300	1	33.0102	24.4319	26.5515	6.12957	5.00184	5.4872	5.86747	2.59771	2.83349	4.20428	2.14847	2.30702	8.7941	6.45234	7.22942	1.74419	1.43528	1.52443	27.9978	5.53954	3.76622	2.88659	7.49195	1.56797
680	29	0	1	3	0	0	1	0	0	0	0	1	3300	0	33.0102	24.4319	25.392	6.12957	5.00184	5.22509	5.86747	2.59771	2.61313	4.20428	2.14847	2.102	8.7941	6.45234	6.85862	1.74419	1.43528	1.46861	27.6113	5.45216	3.69277	2.81825	7.36835	1.54936
681	33	0	2	2	0	0	0	0	0	0	0	1	2500	1	33.0102	24.4319	26.8185	6.12957	5.00184	5.55315	5.86747	2.59771	2.88212	4.20428	2.14847	2.35953	8.7941	6.45234	7.31006	1.74419	1.43528	1.5379	28.0869	5.56152	3.78243	2.90409	7.51883	1.57246
682	33	0	1	3	0	0	1	0	0	1	0	1	4300	0	33.0102	24.4319	28.0463	6.12957	5.00184	5.82097	5.86747	2.59771	3.08881	4.20428	2.14847	2.53551	8.7941	6.45234	7.69454	1.74419	1.43528	1.60379	28.4961	5.65079	3.85133	2.96275	7.64699	1.59442
683	30	0	1	3	0	1	1	1	1	0	0	1	3200	1	32.965	24.2523	26.0311	6.1422	4.96192	5.36356	5.80386	2.57847	2.73136	4.16731	2.13581	2.20119	8.77528	6.39801	7.06548	1.75047	1.42599	1.49402	27.7495	5.48923	3.70456	2.83477	7.41292	1.55683
684	30	0	1	2	0	0	1	0	0	0	0	1	2700	0	32.965	24.2523	28.5581	6.1422	4.96192	5.93339	5.80386	2.57847	3.1462	4.16731	2.13581	2.56926	8.77528	6.39801	7.84219	1.75047	1.42599	1.62504	28.5918	5.67917	3.84284	2.95746	7.67183	1.6005
685	23	0	1	4	0	0	0	0	0	0	0	2	3950	1	33.1279	24.1467	25.5837	6.18703	4.93999	5.24193	5.78928	2.56818	2.60634	4.16496	2.1291	2.08161	8.83285	6.367	6.90016	1.76394	1.42123	1.47624	27.6195	5.45632	3.6546	2.79189	7.36667	1.5538
686	23	0	1	3	0	0	0	0	0	0	0	1	3050	0	33.1279	24.1467	26.7568	6.18703	4.93999	5.52239	5.78928	2.56818	2.86169	4.16496	2.1291	2.33002	8.83285	6.367	7.28233	1.76394	1.42123	1.53107	28.0105	5.54981	3.73972	2.8747	7.49406	1.57208
687	28	0	1	1	0	0	1	0	0	0	0	2	3050	1	33.1279	24.1467	26.7568	6.18703	4.93999	5.52239	5.78928	2.56818	2.86169	4.16496	2.1291	2.33002	8.83285	6.367	7.28233	1.76394	1.42123	1.53107	28.0105	5.54981	3.73972	2.8747	7.49406	1.57208
688	28	0	3	3	0	0	1	0	0	0	0	1	2850	0	33.1279	24.1467	28.6536	6.18703	4.93999	5.94923	5.78928	2.56818	3.16089	4.16496	2.1291	2.58192	8.83285	6.367	7.86842	1.76394	1.42123	1.62846	28.6428	5.69208	3.83945	2.95866	7.68943	1.60454
689	27	1	1	1	0	0	0	0	0	0	0	1	3100	1	33.2655	24.252	26.6531	6.2186	4.96542	5.4968	5.77742	2.58124	2.85548	4.16468	2.13401	2.33132	8.87799	6.40095	7.24733	1.77496	1.42802	1.52385	28.0568	5.56027	3.73804	2.87667	7.50876	1.57561
690	27	0	1	2	0	0	1	0	0	0	0	2	3600	0	33.2655	24.252	28.5318	6.2186	4.96542	5.9135	5.77742	2.58124	3.15127	4.16468	2.13401	2.57998	8.87799	6.40095	7.82894	1.77496	1.42802	1.62267	28.6831	5.69917	3.83664	2.95956	7.70263	1.60855
691	24	0	3	3	0	0	0	0	0	0	0	1	3000	1	33.6213	24.4997	27.5553	6.31067	4.98148	5.73527	5.78648	2.62574	3.00948	4.18266	2.15919	2.494	8.98919	6.47989	7.5218	1.80298	1.43861	1.57233	28.5588	5.67581	3.80723	2.94528	7.66363	1.60464
692	24	0	1	3	0	1	1	1	0	1	0	2	2900	0	33.6213	24.4997	25.6648	6.31067	4.98148	5.31038	5.78648	2.62574	2.67774	4.18266	2.15919	2.18027	8.98919	6.47989	6.9374	1.80298	1.43861	1.46946	27.9286	5.53418	3.69666	2.84071	7.46883	1.57035
693	27	0	3	3	0	0	0	0	0	0	0	1	3100	1	33.5509	24.5616	28.0517	6.32089	4.98412	5.84734	5.75616	2.62059	3.09176	4.17574	2.14969	2.55522	8.99611	6.49121	7.67787	1.80612	1.43899	1.59766	28.7214	5.71745	3.82284	2.96022	7.72173	1.61426
694	27	0	1	4	0	0	1	0	0	0	0	1	3300	0	33.5509	24.5616	27.0185	6.32089	4.98412	5.62761	5.75616	2.62059	2.92956	4.17574	2.14969	2.43267	8.99611	6.49121	7.35205	1.80612	1.43899	1.54283	28.377	5.64421	3.76877	2.91937	7.61312	1.59598
695	23	0	3	1	0	0	1	0	0	0	0	2	3400	1	33.5877	24.6	29.4225	6.34447	4.98081	6.20397	5.7384	2.61633	3.31265	4.17033	2.14711	2.73009	9.02601	6.4984	8.1011	1.81382	1.43768	1.69477	29.2034	5.84308	3.88913	3.01584	7.87517	1.64876
696	23	0	1	2	0	0	1	0	0	0	0	1	3400	0	33.5877	24.6	26.6239	6.34447	4.98081	5.54635	5.7384	2.61633	2.87128	4.17033	2.14711	2.37752	9.02601	6.4984	7.22794	1.81382	1.43768	1.524	28.2706	5.62388	3.742	2.89832	7.58412	1.59183
697	26	0	1	3	0	0	1	0	0	0	0	2	3300	1	33.6068	24.6102	28.237	6.35277	4.97849	5.89762	5.71869	2.61378	3.12958	4.1604	2.14629	2.58572	9.04293	6.49839	7.73138	1.82025	1.43528	1.61103	28.818	5.74296	3.82068	2.96414	7.75756	1.62218
698	26	0	3	3	0	0	0	0	1	0	0	2	3350	0	33.6068	24.6102	29.149	6.35277	4.97849	6.11682	5.71869	2.61378	3.27265	4.1604	2.14629	2.6907	9.04293	6.49839	7.98542	1.82025	1.43528	1.66114	29.122	5.81603	3.86837	2.99913	7.84225	1.63889
699	27	0	1	3	0	0	1	0	0	1	0	1	3100	1	33.6068	24.6102	29.7107	6.35277	4.97849	6.25238	5.71869	2.61378	3.34359	4.1604	2.14629	2.74741	9.04293	6.49839	8.1658	1.82025	1.43528	1.69917	29.3092	5.86121	3.89202	3.01803	7.90237	1.65156
700	27	0	3	1	0	0	1	0	0	0	0	1	3600	0	33.6068	24.6102	25.4563	6.35277	4.97849	5.27588	5.71869	2.61378	2.65888	4.1604	2.14629	2.1602	9.04293	6.49839	6.87375	1.82025	1.43528	1.46623	27.8911	5.53571	3.66378	2.8223	7.47169	1.57392
701	28	0	3	1	0	0	1	0	0	0	0	1	3450	1	33.6068	24.6102	28.524	6.35277	4.97849	5.96324	5.71869	2.61378	3.16455	4.1604	2.14629	2.60891	9.04293	6.49839	7.81777	1.82025	1.43528	1.62493	28.9137	5.76483	3.83234	2.97187	7.78636	1.62682
702	28	0	1	3	0	0	1	0	0	0	0	1	2700	0	33.6068	24.6102	25.1419	6.35277	4.97849	5.22089	5.71869	2.61378	2.60461	4.1604	2.14629	2.12135	9.04293	6.49839	6.76118	1.82025	1.43528	1.45219	27.7863	5.51738	3.64569	2.80934	7.43416	1.56924
703	28	0	3	3	0	0	1	0	0	0	0	1	3200	0	33.4717	24.5832	28.2209	6.33748	4.96943	5.90292	5.68917	2.57736	3.14211	4.14734	2.12387	2.60284	9.01206	6.49949	7.72924	1.81435	1.43712	1.61285	28.7586	5.73661	3.80288	2.95802	7.74693	1.62144
704	28	0	1	4	0	0	0	0	0	0	0	2	3250	1	33.4717	24.5832	25.3467	6.33748	4.96943	5.26834	5.68917	2.57736	2.64395	4.14734	2.12387	2.14659	9.01206	6.49949	6.83511	1.81435	1.43712	1.46281	27.8005	5.52508	3.63682	2.80593	7.44888	1.57143
705	27	0	1	2	0	0	1	0	0	0	0	1	2750	1	33.5189	24.569	26.2706	6.35234	4.968	5.46552	5.6664	2.5699	2.80684	4.13436	2.12315	2.29384	9.03926	6.48513	7.12523	1.82231	1.43667	1.50771	28.1195	5.59529	3.68105	2.85045	7.54987	1.5889
706	27	0	1	1	0	1	0	1	0	0	0	1	3800	0	33.5189	24.569	28.7298	6.35234	4.968	6.01503	5.6664	2.5699	3.201	4.13436	2.12315	2.63336	9.03926	6.48513	7.88558	1.82231	1.43667	1.63401	28.9392	5.77846	3.81244	2.96362	7.80332	1.631
707	30	0	1	3	0	0	0	0	0	0	0	2	2850	1	33.7882	24.1769	29.1587	6.42479	4.8845	6.12497	5.66755	2.51235	3.27686	4.14322	2.08103	2.69707	9.12757	6.35848	8.01888	1.8415	1.41261	1.65959	29.0413	5.81142	3.81892	2.97377	7.83498	1.6379
708	30	0	3	3	0	0	1	0	0	0	0	1	2850	0	33.7882	24.1769	27.0365	6.42479	4.8845	5.64358	5.66755	2.51235	2.94506	4.14322	2.08103	2.42947	9.12757	6.35848	7.36494	1.8415	1.41261	1.54733	28.3339	5.65096	3.70832	2.88457	7.617	1.60048
709	31	0	1	1	0	0	1	0	0	0	0	1	2500	1	33.7882	24.1769	29.1587	6.42479	4.8845	6.12497	5.66755	2.51235	3.27686	4.14322	2.08103	2.69707	9.12757	6.35848	8.01888	1.8415	1.41261	1.65959	29.0413	5.81142	3.81892	2.97377	7.83498	1.6379
710	31	0	1	4	0	0	1	0	1	0	0	2	2900	0	33.7882	24.1769	29.1587	6.42479	4.8845	6.12497	5.66755	2.51235	3.27686	4.14322	2.08103	2.69707	9.12757	6.35848	8.01888	1.8415	1.41261	1.65959	29.0413	5.81142	3.81892	2.97377	7.83498	1.6379
711	21	0	3	2	0	1	1	1	0	0	0	1	3400	1	33.5711	23.9889	30.0491	6.43244	4.82479	6.36203	5.57312	2.47447	3.43733	4.08599	2.05349	2.82746	9.09802	6.28995	8.30471	1.83991	1.39686	1.73265	29.203	5.87309	3.8283	2.98898	7.89756	1.65647
712	21	0	3	1	0	0	1	0	0	0	0	1	2650	0	33.5711	23.9889	30.1807	6.43244	4.82479	6.35461	5.57312	2.47447	3.42625	4.08599	2.05349	2.79861	9.09802	6.28995	8.31979	1.83991	1.39686	1.72386	29.2469	5.87061	3.82461	2.97936	7.90259	1.65354
713	23	0	3	4	0	0	1	0	0	0	0	2	2850	1	33.5711	23.9889	30.2585	6.43244	4.82479	6.3865	5.57312	2.47447	3.4475	4.08599	2.05349	2.82281	9.09802	6.28995	8.34739	1.83991	1.39686	1.73055	29.2728	5.88124	3.83169	2.98743	7.91179	1.65577
714	23	0	1	2	0	0	1	0	0	0	0	1	3100	0	33.5711	23.9889	30.2585	6.43244	4.82479	6.3865	5.57312	2.47447	3.4475	4.08599	2.05349	2.82281	9.09802	6.28995	8.34739	1.83991	1.39686	1.73055	29.2728	5.88124	3.83169	2.98743	7.91179	1.65577
715	32	0	1	1	0	1	1	1	0	0	0	1	2950	1	33.5711	23.9889	30.2335	6.43244	4.82479	6.391	5.57312	2.47447	3.45197	4.08599	2.05349	2.8328	9.09802	6.28995	8.3498	1.83991	1.39686	1.73226	29.2645	5.88274	3.83318	2.99076	7.91259	1.65634
716	32	0	1	1	0	0	0	0	1	0	0	2	3600	0	33.5711	23.9889	30.0815	6.43244	4.82479	6.36496	5.57312	2.47447	3.43456	4.08599	2.05349	2.82048	9.09802	6.28995	8.3164	1.83991	1.39686	1.73449	29.2138	5.87406	3.82738	2.98665	7.90146	1.65708
717	35	1	3	3	0	1	1	0	0	0	0	2	3400	1	33.5711	23.9889	28.75	6.43244	4.82479	6.02364	5.57312	2.47447	3.23156	4.08599	2.05349	2.65928	9.09802	6.28995	7.90529	1.83991	1.39686	1.64015	28.77	5.76029	3.75971	2.93292	7.76442	1.62564
718	35	0	3	3	0	0	1	0	0	0	0	2	3800	0	33.5711	23.9889	30.0491	6.43244	4.82479	6.36203	5.57312	2.47447	3.43733	4.08599	2.05349	2.82746	9.09802	6.28995	8.30471	1.83991	1.39686	1.73265	29.203	5.87309	3.8283	2.98898	7.89756	1.65647
719	24	0	3	1	0	1	1	1	0	0	0	1	3600	1	33.4382	24.0182	29.4407	6.41739	4.82489	6.20108	5.51675	2.47077	3.34064	4.0569	2.05046	2.7467	9.08247	6.29504	8.10916	1.8391	1.39689	1.67844	28.9657	5.81446	3.77605	2.95135	7.82889	1.63815
720	24	0	1	3	0	0	1	0	0	0	0	1	3850	0	33.4382	24.0182	30.2386	6.41739	4.82489	6.40112	5.51675	2.47077	3.46566	4.0569	2.05046	2.84405	9.08247	6.29504	8.35762	1.8391	1.39689	1.73834	29.2317	5.88113	3.81773	2.9838	7.91171	1.65811
721	28	0	1	2	0	1	0	1	0	0	0	2	2700	1	33.2816	23.9634	30.3029	6.40294	4.79898	6.43648	5.47113	2.45765	3.5155	4.02348	2.04239	2.88845	9.05076	6.2694	8.39941	1.83468	1.39054	1.739	29.1826	5.87947	3.81476	2.98477	7.90652	1.65474
722	28	0	1	2	0	1	0	0	0	0	0	2	3120	0	33.2816	23.9634	30.1008	6.40294	4.79898	6.3906	5.47113	2.45765	3.47539	4.02348	2.04239	2.86286	9.05076	6.2694	8.33035	1.83468	1.39054	1.73522	29.1153	5.86417	3.80139	2.97624	7.8835	1.65348
723	29	0	1	1	0	0	1	0	0	0	0	2	3450	1	33.2816	23.9634	30.5106	6.40294	4.79898	6.45472	5.47113	2.45765	3.49659	4.02348	2.04239	2.8597	9.05076	6.2694	8.4277	1.83468	1.39054	1.74743	29.2518	5.88555	3.80846	2.97519	7.91595	1.65755
724	29	0	1	3	0	0	1	0	0	0	0	1	3300	0	33.2816	23.9634	30.4339	6.40294	4.79898	6.42289	5.47113	2.45765	3.47543	4.02348	2.04239	2.83535	9.05076	6.2694	8.40042	1.83468	1.39054	1.74078	29.2263	5.87494	3.8014	2.96707	7.90686	1.65534
725	27	0	3	3	0	0	1	0	0	0	0	1	3150	1	32.9409	23.9399	29.5913	6.349	4.79144	6.23667	5.38659	2.45476	3.35858	3.96477	2.0418	2.75469	8.96535	6.25607	8.16503	1.81847	1.38855	1.68877	28.824	5.79237	3.73331	2.92042	7.79548	1.63193
726	27	0	3	1	0	0	1	0	1	0	0	2	2250	0	32.9409	23.9399	29.7523	6.349	4.79144	6.28085	5.38659	2.45476	3.39346	3.96477	2.0418	2.78454	8.96535	6.25607	8.21423	1.81847	1.38855	1.69759	28.8777	5.8071	3.74494	2.93037	7.81188	1.63487
727	28	0	1	1	0	0	1	0	1	0	0	2	3400	1	32.9409	23.9399	30.4211	6.349	4.79144	6.47736	5.38659	2.45476	3.61182	3.96477	2.0418	2.9892	8.96535	6.25607	8.43208	1.81847	1.38855	1.74049	29.1006	5.8726	3.81772	2.99859	7.8845	1.64917
728	28	0	1	2	0	0	1	0	0	0	0	1	3250	0	32.9409	23.9399	30.1321	6.349	4.79144	6.40003	5.38659	2.45476	3.4907	3.96477	2.0418	2.87026	8.96535	6.25607	8.35134	1.81847	1.38855	1.7339	29.0043	5.84682	3.77735	2.95895	7.85759	1.64698
729	23	0	3	2	1	0	0	0	0	0	0	1	2250	1	32.7731	23.8137	30.7474	6.32623	4.77048	6.54052	5.2948	2.44532	3.59569	3.91266	2.03289	2.95624	8.92253	6.2247	8.53838	1.81267	1.38275	1.76287	29.1114	5.87908	3.7786	2.96727	7.8952	1.65276
730	23	0	3	1	0	0	1	0	0	0	0	1	3500	0	32.7731	23.8137	29.6642	6.32623	4.77048	6.24687	5.2948	2.44532	3.37408	3.91266	2.03289	2.76267	8.92253	6.2247	8.19207	1.81267	1.38275	1.6927	28.7503	5.78119	3.70473	2.90274	7.77977	1.62937
731	28	0	2	1	0	0	0	0	0	0	0	2	3250	1	32.7731	23.8137	30.9053	6.32623	4.77048	6.57659	5.2948	2.44532	3.63079	3.91266	2.03289	2.98786	8.92253	6.2247	8.58948	1.81267	1.38275	1.77063	29.164	5.8911	3.7903	2.9778	7.91224	1.65535
732	28	0	3	3	0	0	1	0	0	0	0	2	3400	0	32.7731	23.8137	29.9614	6.32623	4.77048	6.33038	5.2948	2.44532	3.42511	3.91266	2.03289	2.80897	8.92253	6.2247	8.27709	1.81267	1.38275	1.70968	28.8494	5.80903	3.72174	2.91818	7.80811	1.63503
733	27	0	1	3	0	0	1	0	0	0	0	1	2550	1	32.8389	23.6036	30.8241	6.35016	4.72989	6.51818	5.24682	2.42799	3.53703	3.88868	2.0173	2.88189	8.93742	6.16954	8.51534	1.81996	1.37034	1.76249	29.0888	5.86608	3.73728	2.92929	7.8741	1.65093
734	27	0	1	3	0	1	1	1	0	0	0	2	3650	0	32.8389	23.6036	30.6903	6.35016	4.72989	6.52763	5.24682	2.42799	3.57375	3.88868	2.0173	2.93441	8.93742	6.16954	8.51732	1.81996	1.37034	1.76422	29.0442	5.86923	3.74952	2.9468	7.87476	1.65151
735	28	0	3	1	0	1	1	1	0	0	0	2	2900	1	32.8389	23.6036	29.8943	6.35016	4.72989	6.29788	5.24682	2.42799	3.40247	3.88868	2.0173	2.78542	8.93742	6.16954	8.25632	1.81996	1.37034	1.70488	28.7789	5.79265	3.69243	2.89713	7.78776	1.63173
736	28	0	3	3	0	0	1	0	0	0	0	1	2700	0	32.8389	23.6036	29.8715	6.35016	4.72989	6.28721	5.24682	2.42799	3.40052	3.88868	2.0173	2.78393	8.93742	6.16954	8.25051	1.81996	1.37034	1.70682	28.7713	5.78909	3.69178	2.89664	7.78582	1.63237
737	29	0	3	3	0	0	1	0	0	0	0	2	3450	1	32.8389	23.6036	30.8347	6.35016	4.72989	6.5607	5.24682	2.42799	3.59677	3.88868	2.0173	2.95181	8.93742	6.16954	8.56356	1.81996	1.37034	1.77057	29.0924	5.88025	3.75719	2.9526	7.89017	1.65362
738	29	0	1	3	0	0	1	0	0	0	0	1	3450	0	32.8389	23.6036	30.9776	6.35016	4.72989	6.5788	5.24682	2.42799	3.58049	3.88868	2.0173	2.93162	8.93742	6.16954	8.58828	1.81996	1.37034	1.78319	29.14	5.88628	3.75177	2.94587	7.89841	1.65783
739	26	0	1	3	0	0	1	0	0	0	0	2	3100	1	32.8031	23.4541	31.3351	6.35715	4.69794	6.68225	5.18773	2.41483	3.7014	3.85567	2.0065	3.05309	8.92509	6.1272	8.71457	1.82168	1.3613	1.79682	29.1974	5.91245	3.76799	2.97176	7.92228	1.65993
740	26	0	3	2	0	0	1	0	1	0	0	1	3700	0	32.8031	23.4541	31.3089	6.35715	4.69794	6.62492	5.18773	2.41483	3.60348	3.85567	2.0065	2.93453	8.92509	6.1272	8.66573	1.82168	1.3613	1.79221	29.1887	5.89334	3.73535	2.93224	7.906	1.65839
741	27	0	1	2	0	0	1	0	0	0	0	1	3550	1	32.8031	23.4541	30.8814	6.35715	4.69794	6.57309	5.18773	2.41483	3.5921	3.85567	2.0065	2.95465	8.92509	6.1272	8.56861	1.82168	1.3613	1.7818	29.0462	5.87606	3.73155	2.93894	7.87363	1.65493
742	27	0	3	3	0	0	0	0	0	0	0	1	2800	0	32.8031	23.4541	31.0584	6.35715	4.69794	6.60871	5.18773	2.41483	3.60818	3.85567	2.0065	2.96503	8.92509	6.1272	8.6166	1.82168	1.3613	1.79302	29.1052	5.88793	3.73691	2.9424	7.88963	1.65867
743	30	0	3	3	0	0	1	0	0	0	0	1	2750	1	32.8031	23.4541	31.3356	6.35715	4.69794	6.65694	5.18773	2.41483	3.6265	3.85567	2.0065	2.96782	8.92509	6.1272	8.68883	1.82168	1.3613	1.79944	29.1976	5.90401	3.74302	2.94333	7.9137	1.66081
744	30	0	1	3	0	0	1	0	0	0	0	2	3850	0	32.8031	23.4541	31.3642	6.35715	4.69794	6.63805	5.18773	2.41483	3.74003	3.85567	2.0065	3.09053	8.92509	6.1272	8.69741	1.82168	1.3613	1.7826	29.2072	5.89772	3.78087	2.98424	7.91656	1.65519
745	28	0	1	1	0	0	0	0	0	0	0	2	3250	1	32.3604	23.281	31.8425	6.30314	4.65945	6.75639	5.03274	2.39483	3.69128	3.75956	1.99079	3.01282	8.83573	6.07433	8.82694	1.80766	1.35126	1.82421	29.1613	5.90633	3.70628	2.92105	7.91233	1.66104
746	28	0	1	2	0	0	0	0	0	0	0	2	2550	0	32.3604	23.281	30.9187	6.30314	4.65945	6.54245	5.03274	2.39483	3.56171	3.75956	1.99079	2.91925	8.83573	6.07433	8.55771	1.80766	1.35126	1.76406	28.8534	5.83501	3.6631	2.88987	7.82259	1.641
747	30	0	3	1	0	0	1	0	0	0	0	2	3750	1	32.3604	23.281	31.7927	6.30314	4.65945	6.75625	5.03274	2.39483	3.69287	3.75956	1.99079	3.02128	8.83573	6.07433	8.82296	1.80766	1.35126	1.8248	29.1447	5.90628	3.70681	2.92388	7.91101	1.66124
748	30	0	1	2	0	0	1	0	1	0	0	1	3150	0	32.3604	23.281	31.5262	6.30314	4.65945	6.70959	5.03274	2.39483	3.66702	3.75956	1.99079	3.00783	8.83573	6.07433	8.75413	1.80766	1.35126	1.82154	29.0559	5.89072	3.6982	2.91939	7.88806	1.66015
749	31	0	3	3	0	0	1	0	0	0	0	2	3650	1	32.3604	23.281	31.7927	6.30314	4.65945	6.75625	5.03274	2.39483	3.69287	3.75956	1.99079	3.02128	8.83573	6.07433	8.82296	1.80766	1.35126	1.8248	29.1447	5.90628	3.70681	2.92388	7.91101	1.66124
750	31	0	1	3	0	0	1	0	0	0	0	1	3800	0	32.3604	23.281	31.4842	6.30314	4.65945	6.70152	5.03274	2.39483	3.67057	3.75956	1.99079	3.0156	8.83573	6.07433	8.74177	1.80766	1.35126	1.81688	29.0419	5.88803	3.69938	2.92198	7.88394	1.6586
751	27	0	1	4	0	0	1	0	0	0	0	1	3350	1	32.1338	23.237	31.412	6.27474	4.64393	6.69253	4.9593	2.38817	3.67891	3.71338	1.98602	3.02584	8.78749	6.05974	8.72658	1.79977	1.34706	1.81063	28.9276	5.8704	3.67546	2.90841	7.85794	1.65249
752	27	0	3	1	0	0	1	0	0	1	0	2	3150	0	32.1338	23.237	30.9766	6.27474	4.64393	6.54876	4.9593	2.38817	3.55942	3.71338	1.98602	2.91609	8.78749	6.05974	8.57079	1.79977	1.34706	1.76846	28.7825	5.82248	3.63563	2.87183	7.80601	1.63843
753	31	0	1	2	0	1	1	1	0	0	0	1	3100	1	32.1338	23.237	31.5029	6.27474	4.64393	6.72052	4.9593	2.38817	3.78531	3.71338	1.98602	3.13637	8.78749	6.05974	8.74963	1.79977	1.34706	1.80102	28.9579	5.87973	3.71093	2.94526	7.86562	1.64928
754	31	0	1	3	0	1	0	0	0	1	0	1	3170	0	32.1338	23.237	31.482	6.27474	4.64393	6.6673	4.9593	2.38817	3.65525	3.71338	1.98602	2.98409	8.78749	6.05974	8.7022	1.79977	1.34706	1.79734	28.9509	5.86199	3.66757	2.89449	7.84981	1.64806
755	30	0	1	1	0	0	0	0	0	0	0	2	3400	1	31.7563	23.233	31.8519	6.22544	4.64098	6.78451	4.82618	2.38823	3.71946	3.62586	1.98538	3.05287	8.67214	6.05796	8.8493	1.78258	1.34548	1.84156	28.947	5.88364	3.64462	2.88804	7.8598	1.65654
756	30	0	1	3	0	0	0	0	1	1	0	1	3400	0	31.7563	23.233	31.6335	6.22544	4.64098	6.754	4.82618	2.38823	3.80102	3.62586	1.98538	3.14567	8.67214	6.05796	8.7898	1.78258	1.34548	1.8107	28.8743	5.87347	3.67181	2.91897	7.83997	1.64626
757	30	0	1	2	0	0	0	0	0	0	0	2	3500	1	31.1588	23.3462	31.715	6.14099	4.66599	6.7537	4.66039	2.39887	3.73285	3.51666	1.99312	3.06768	8.48635	6.08873	8.81767	1.75189	1.35232	1.82221	28.74	5.85356	3.59737	2.85915	7.79758	1.64214
758	30	0	1	3	0	0	0	0	1	0	0	2	3750	0	31.1588	23.3462	32.1244	6.14099	4.66599	6.85415	4.66039	2.39887	3.82828	3.51666	1.99312	3.16147	8.48635	6.08873	8.94527	1.75189	1.35232	1.84076	28.8764	5.88704	3.62918	2.89042	7.84012	1.64833
759	29	0	1	4	0	0	1	0	0	0	0	1	3300	1	30.9063	23.436	31.5331	6.12332	4.67906	6.71533	4.59173	2.3883	3.71918	3.47402	1.97947	3.05987	8.40258	6.11485	8.76532	1.7399	1.35692	1.81495	28.6251	5.83924	3.5664	2.83779	7.76092	1.63726
760	29	0	1	1	0	0	1	0	0	0	0	1	2850	0	30.9063	23.436	31.5331	6.12332	4.67906	6.71533	4.59173	2.3883	3.71918	3.47402	1.97947	3.05987	8.40258	6.11485	8.76532	1.7399	1.35692	1.81495	28.6251	5.83924	3.5664	2.83779	7.76092	1.63726
761	30	0	1	2	0	0	1	0	0	0	0	2	2700	1	30.6501	23.4819	31.5901	6.10827	4.67931	6.73331	4.53364	2.38162	3.73538	3.43853	1.96645	3.07722	8.32218	6.12845	8.77804	1.72581	1.35818	1.8194	28.574	5.84029	3.55021	2.8274	7.74289	1.63446
762	30	0	3	2	0	1	0	1	1	0	0	2	1250	0	30.6501	23.4819	32.1341	6.10827	4.67931	6.80865	4.53364	2.38162	3.88484	3.43853	1.96645	3.21762	8.32218	6.12845	8.91904	1.72581	1.35818	1.82545	28.7553	5.86541	3.60003	2.8742	7.78989	1.63648
763	29	0	1	2	0	0	1	0	0	0	0	1	3000	1	30.2241	23.5208	31.8195	6.0639	4.68074	6.78697	4.42634	2.37765	3.76765	3.36748	1.96023	3.10877	8.19409	6.13368	8.84529	1.70438	1.358	1.83903	28.5215	5.84387	3.52388	2.81216	7.72435	1.63381
764	29	0	3	3	0	0	0	0	0	0	0	2	2900	0	30.2241	23.5208	31.8195	6.0639	4.68074	6.78697	4.42634	2.37765	3.76765	3.36748	1.96023	3.10877	8.19409	6.13368	8.84529	1.70438	1.358	1.83903	28.5215	5.84387	3.52388	2.81216	7.72435	1.63381
765	28	0	2	3	0	0	0	0	0	0	0	2	3300	1	30.0853	23.4639	32.2623	6.05699	4.67334	6.87647	4.38786	2.34212	3.81531	3.32809	1.93434	3.13513	8.12434	6.12837	8.96666	1.68934	1.35765	1.86183	28.6038	5.86893	3.5151	2.79919	7.73979	1.63627
766	28	0	3	3	0	0	0	0	0	0	0	2	3000	0	30.0853	23.4639	32.1854	6.05699	4.67334	6.82478	4.38786	2.34212	3.90845	3.32809	1.93434	3.24098	8.12434	6.12837	8.93808	1.68934	1.35765	1.83081	28.5782	5.85171	3.54614	2.83447	7.73027	1.62593
767	34	0	1	1	0	0	1	0	0	0	0	2	2750	1	29.4277	23.6289	32.5882	5.95769	4.71224	6.88302	4.24172	2.35665	4.0144	3.21429	1.94475	3.34559	7.92074	6.17897	9.04272	1.65353	1.36788	1.84931	28.5483	5.85098	3.53759	2.83488	7.71414	1.62357
768	34	0	3	3	0	0	1	0	1	1	0	1	2850	0	29.4277	23.6289	32.1855	5.95769	4.71224	6.86716	4.24172	2.35665	3.82534	3.21429	1.94475	3.15855	7.92074	6.17897	8.94473	1.65353	1.36788	1.86218	28.414	5.84569	3.47457	2.77253	7.68148	1.62787
769	25	0	1	1	0	0	1	0	0	0	0	2	3200	1	28.8543	23.8262	32.3062	5.86101	4.76048	6.85021	4.13536	2.37517	3.93203	3.13923	1.95882	3.25881	7.74979	6.23632	8.96845	1.61965	1.38023	1.83806	28.3289	5.8239	3.48085	2.78562	7.65152	1.61265
770	25	0	2	3	0	1	1	1	0	0	0	1	3200	0	28.8543	23.8262	32.4919	5.86101	4.76048	6.94343	4.13536	2.37517	3.93057	3.13923	1.95882	3.25824	7.74979	6.23632	9.05327	1.61965	1.38023	1.86459	28.3908	5.85497	3.48037	2.78543	7.6798	1.62149
771	29	0	1	1	0	0	0	0	0	0	0	1	2900	1	28.8543	23.8262	32.8867	5.86101	4.76048	6.93034	4.13536	2.37517	4.09658	3.13923	1.95882	3.41709	7.74979	6.23632	9.12431	1.61965	1.38023	1.86271	28.5224	5.85061	3.5357	2.83838	7.70348	1.62086
772	29	0	1	2	0	0	0	0	1	0	1	2	3200	0	28.8543	23.8262	32.3343	5.86101	4.76048	6.89889	4.13536	2.37517	3.88531	3.13923	1.95882	3.20929	7.74979	6.23632	9.00351	1.61965	1.38023	1.85621	28.3383	5.84013	3.46528	2.76911	7.66321	1.6187
773	29	0	1	1	0	1	1	1	0	0	0	1	2850	1	28.8543	23.8262	32.565	5.86101	4.76048	6.8877	4.13536	2.37517	3.98664	3.13923	1.95882	3.32237	7.74979	6.23632	9.05048	1.61965	1.38023	1.85084	28.4152	5.8364	3.49906	2.8068	7.67886	1.61691
774	29	0	1	3	0	0	0	0	0	0	0	2	2500	0	28.8543	23.8262	32.3062	5.86101	4.76048	6.85021	4.13536	2.37517	3.93203	3.13923	1.95882	3.25881	7.74979	6.23632	8.96845	1.61965	1.38023	1.83806	28.3289	5.8239	3.48085	2.78562	7.65152	1.61265
775	36	0	3	3	0	1	1	1	0	1	0	2	2200	1	28.8543	23.8262	31.9919	5.86101	4.76048	6.82362	4.13536	2.37517	3.82065	3.13923	1.95882	3.15969	7.74979	6.23632	8.89518	1.61965	1.38023	1.84679	28.2242	5.81503	3.44373	2.75258	7.6271	1.61556
776	36	0	3	3	0	1	1	0	0	0	0	1	2250	0	28.8543	23.8262	32.4447	5.86101	4.76048	6.91299	4.13536	2.37517	3.8509	3.13923	1.95882	3.17039	7.74979	6.23632	9.02271	1.61965	1.38023	1.87884	28.3751	5.84483	3.45381	2.75614	7.66961	1.62624
777	23	0	1	3	0	0	1	0	0	0	0	2	3100	1	28.1818	24.0095	32.4534	5.75998	4.79744	6.8797	4.0097	2.39093	3.96702	3.05307	1.97129	3.29558	7.56043	6.28828	9.01197	1.5831	1.39057	1.84378	28.2149	5.81238	3.45588	2.77331	7.62023	1.60582
778	23	0	3	4	0	0	1	0	0	0	0	1	3400	0	28.1818	24.0095	32.0557	5.75998	4.79744	6.84954	4.0097	2.39093	3.93502	3.05307	1.97129	3.27972	7.56043	6.28828	8.90924	1.5831	1.39057	1.8334	28.0823	5.80232	3.44522	2.76803	7.58598	1.60236
779	27	0	1	3	0	0	1	0	0	0	0	2	2900	1	28.1818	24.0095	32.8668	5.75998	4.79744	6.93379	4.0097	2.39093	4.07969	3.05307	1.97129	3.40289	7.56043	6.28828	9.12261	1.5831	1.39057	1.86255	28.3527	5.83041	3.49344	2.80909	7.65711	1.61207
780	27	0	3	3	0	0	1	0	1	0	0	1	2800	0	28.1818	24.0095	32.0691	5.75998	4.79744	6.84085	4.0097	2.39093	3.93125	3.05307	1.97129	3.27429	7.56043	6.28828	8.90745	1.5831	1.39057	1.83028	28.0868	5.79943	3.44396	2.76622	7.58539	1.60132
781	27	0	1	3	0	0	0	0	0	0	0	1	2950	1	28.1818	24.0095	32.3454	5.75998	4.79744	6.86163	4.0097	2.39093	3.94676	3.05307	1.97129	3.27343	7.56043	6.28828	8.97895	1.5831	1.39057	1.83985	28.1789	5.80635	3.44913	2.76593	7.60922	1.60451
782	27	0	3	3	0	0	1	0	0	0	0	2	2850	0	28.1818	24.0095	32.3454	5.75998	4.79744	6.86163	4.0097	2.39093	3.94676	3.05307	1.97129	3.27343	7.56043	6.28828	8.97895	1.5831	1.39057	1.83985	28.1789	5.80635	3.44913	2.76593	7.60922	1.60451
783	28	0	1	2	0	0	1	0	0	0	0	1	3800	1	28.1818	24.0095	32.2225	5.75998	4.79744	6.8902	4.0097	2.39093	3.93312	3.05307	1.97129	3.26626	7.56043	6.28828	8.96606	1.5831	1.39057	1.84644	28.1379	5.81588	3.44458	2.76354	7.60492	1.6067
784	28	0	1	3	0	0	0	0	0	0	0	2	3050	0	28.1818	24.0095	32.128	5.75998	4.79744	6.8572	4.0097	2.39093	3.84342	3.05307	1.97129	3.18126	7.56043	6.28828	8.93052	1.5831	1.39057	1.85654	28.1064	5.80488	3.41468	2.73521	7.59308	1.61007
785	33	0	1	2	0	1	0	1	0	0	0	2	3100	1	27.8082	24.274	32.0223	5.69665	4.8542	6.84572	3.93395	2.41799	3.93875	3.00531	1.99133	3.28639	7.45577	6.3667	8.90231	1.56365	1.40704	1.8303	28.0349	5.79886	3.43023	2.76101	7.57493	1.60033
786	33	0	3	3	0	0	1	0	0	0	0	2	2800	0	27.8082	24.274	32.3169	5.69665	4.8542	6.85809	3.93395	2.41799	3.9505	3.00531	1.99133	3.27976	7.45577	6.3667	8.97316	1.56365	1.40704	1.83694	28.133	5.80298	3.43414	2.7588	7.59854	1.60254
787	26	0	1	3	0	0	0	0	0	0	0	1	3400	1	27.5803	24.4448	32.3734	5.64241	4.89895	6.93011	3.90234	2.43011	3.95012	2.98132	2.00134	3.28936	7.38579	6.41636	9.0195	1.54932	1.41743	1.85652	28.1329	5.82382	3.42752	2.75734	7.60722	1.60776
788	26	0	1	1	0	0	0	0	0	0	0	1	3300	0	27.5803	24.4448	32.5091	5.64241	4.89895	6.94783	3.90234	2.43011	3.94844	2.98132	2.00134	3.27582	7.38579	6.41636	9.06283	1.54932	1.41743	1.86337	28.1781	5.82973	3.42696	2.75283	7.62166	1.61004
789	30	0	1	1	0	0	1	0	0	0	0	2	2650	1	27.5803	24.4448	32.3734	5.64241	4.89895	6.93011	3.90234	2.43011	3.95012	2.98132	2.00134	3.28936	7.38579	6.41636	9.0195	1.54932	1.41743	1.85652	28.1329	5.82382	3.42752	2.75734	7.60722	1.60776
790	30	0	3	2	0	1	0	0	0	0	0	2	3180	0	27.5803	24.4448	32.9782	5.64241	4.89895	6.95273	3.90234	2.43011	4.17251	2.98132	2.00134	3.49024	7.38579	6.41636	9.13227	1.54932	1.41743	1.86227	28.3345	5.83136	3.50165	2.8243	7.64481	1.60967
791	30	0	1	2	0	0	1	0	0	0	0	1	3200	1	27.7784	24.3547	33.0008	5.67818	4.88996	6.95383	3.92111	2.4065	4.18809	2.9879	1.98605	3.50575	7.4534	6.37773	9.13486	1.56301	1.41117	1.86185	28.378	5.84066	3.50523	2.82656	7.65533	1.61201
792	30	0	1	3	0	0	0	0	0	1	0	2	3450	0	27.7784	24.3547	32.056	5.67818	4.88996	6.8571	3.92111	2.4065	3.95592	2.9879	1.98605	3.30281	7.4534	6.37773	8.90894	1.56301	1.41117	1.83301	28.063	5.80841	3.42785	2.75892	7.58002	1.6024
793	32	0	1	2	0	0	1	0	0	0	0	2	3150	1	27.7784	24.3547	33.178	5.67818	4.88996	6.98241	3.92111	2.4065	4.2754	2.9879	1.98605	3.57416	7.4534	6.37773	9.152	1.56301	1.41117	1.86503	28.437	5.85018	3.53434	2.84937	7.66104	1.61307
794	32	0	3	3	0	0	1	0	0	0	0	1	3500	0	27.7784	24.3547	32.1964	5.67818	4.88996	6.85088	3.92111	2.4065	3.96234	2.9879	1.98605	3.3043	7.4534	6.37773	8.93443	1.56301	1.41117	1.83018	28.1098	5.80634	3.42998	2.75942	7.58852	1.60145
795	27	0	3	3	0	0	0	0	0	1	0	2	2950	0	28.5828	23.2232	33.3468	5.84207	4.65588	7.03145	4.08841	2.1864	4.24884	3.11362	1.82142	3.55753	7.65585	6.06705	9.23852	1.60381	1.35072	1.88199	28.3843	5.84313	3.50788	2.83086	7.65381	1.61217
796	27	0	3	2	0	0	0	0	0	0	0	1	2950	1	28.5828	23.2232	32.5717	5.84207	4.65588	6.9743	4.08841	2.1864	4.02057	3.11362	1.82142	3.35149	7.65585	6.06705	9.07146	1.60381	1.35072	1.86494	28.1259	5.82409	3.43179	2.76218	7.59812	1.60649
797	28	1	3	3	0	0	1	0	0	0	0	2	2900	1	28.5828	23.2232	32.5717	5.84207	4.65588	6.9743	4.08841	2.1864	4.02057	3.11362	1.82142	3.35149	7.65585	6.06705	9.07146	1.60381	1.35072	1.86494	28.1259	5.82409	3.43179	2.76218	7.59812	1.60649
798	28	0	3	3	0	1	1	1	1	0	0	1	2750	0	28.5828	23.2232	32.5533	5.84207	4.65588	6.933	4.08841	2.1864	4.02273	3.11362	1.82142	3.35555	7.65585	6.06705	9.04241	1.60381	1.35072	1.85135	28.1198	5.81032	3.43251	2.76353	7.58844	1.60196
799	28	0	3	1	0	0	0	0	0	0	0	1	3350	1	28.5828	23.2232	32.4238	5.84207	4.65588	6.94281	4.08841	2.1864	4.01866	3.11362	1.82142	3.35616	7.65585	6.06705	9.02071	1.60381	1.35072	1.85514	28.0766	5.81359	3.43116	2.76373	7.5812	1.60322
800	28	0	1	3	0	0	1	0	1	0	0	1	3250	0	28.5828	23.2232	32.4238	5.84207	4.65588	6.94281	4.08841	2.1864	4.01866	3.11362	1.82142	3.35616	7.65585	6.06705	9.02071	1.60381	1.35072	1.85514	28.0766	5.81359	3.43116	2.76373	7.5812	1.60322
801	30	0	1	3	0	0	0	0	0	0	0	2	2950	1	28.6076	23.0242	32.5317	5.86644	4.60245	6.95612	4.04122	2.17324	4.03447	3.0868	1.80963	3.37641	7.67378	6.00507	9.05095	1.6091	1.33674	1.85633	28.0545	5.80834	3.41631	2.75761	7.5766	1.60072
802	30	0	1	3	0	0	1	0	0	0	0	1	3150	0	28.6076	23.0242	34.3167	5.86644	4.60245	7.22186	4.04122	2.17324	4.48032	3.0868	1.80963	3.73371	7.67378	6.00507	9.4784	1.6091	1.33674	1.92509	28.6495	5.89692	3.56492	2.87671	7.71908	1.62364
803	25	0	3	3	0	0	1	0	0	0	0	2	3350	1	28.5051	22.9244	33.2494	5.85794	4.58018	7.12477	3.99618	2.16306	4.08314	3.067	1.80157	3.39554	7.64686	5.97799	9.28938	1.6055	1.33002	1.90822	28.2263	5.8543	3.41412	2.7547	7.63808	1.61458
804	25	0	2	3	0	0	1	0	0	0	0	1	3100	0	28.5051	22.9244	35.0974	5.85794	4.58018	7.33847	3.99618	2.16306	4.64936	3.067	1.80157	3.85734	7.64686	5.97799	9.69186	1.6055	1.33002	1.96581	28.8423	5.92553	3.60287	2.90864	7.77224	1.63377
805	34	0	3	3	0	0	1	0	0	0	0	1	3050	1	28.5051	22.9244	34.4034	5.85794	4.58018	7.25422	3.99618	2.16306	4.47315	3.067	1.80157	3.72994	7.64686	5.97799	9.52274	1.6055	1.33002	1.93485	28.611	5.89745	3.54413	2.86617	7.71586	1.62346
806	34	1	3	1	0	0	1	0	0	0	0	1	3400	0	28.5051	22.9244	33.6182	5.85794	4.58018	7.09901	3.99618	2.16306	4.29764	3.067	1.80157	3.60242	7.64686	5.97799	9.32352	1.6055	1.33002	1.8992	28.3493	5.84571	3.48562	2.82366	7.64946	1.61157
807	24	0	1	3	0	0	1	0	0	0	0	1	2850	1	28.2897	23.045	34.3913	5.80055	4.61009	7.25983	3.97594	2.17933	4.48659	3.05354	1.80957	3.74412	7.56962	6.0238	9.51884	1.59072	1.33815	1.93356	28.5753	5.89016	3.54729	2.86908	7.70409	1.62081
808	24	0	1	1	0	0	0	0	0	1	0	1	3400	0	28.2897	23.045	33.5954	5.80055	4.61009	7.10301	3.97594	2.17933	4.30971	3.05354	1.80957	3.61588	7.56962	6.0238	9.31685	1.59072	1.33815	1.89738	28.31	5.83788	3.48833	2.82633	7.63676	1.60875
809	34	0	3	2	0	0	0	0	0	0	0	2	3000	1	28.2897	23.045	32.9213	5.80055	4.61009	7.01194	3.97594	2.17933	4.0862	3.05354	1.80957	3.40828	7.56962	6.0238	9.15645	1.59072	1.33815	1.87231	28.0853	5.80752	3.41383	2.75713	7.58329	1.6004
810	34	0	1	1	0	0	1	0	1	0	0	1	3100	0	28.2897	23.045	34.3913	5.80055	4.61009	7.25983	3.97594	2.17933	4.48659	3.05354	1.80957	3.74412	7.56962	6.0238	9.51884	1.59072	1.33815	1.93356	28.5753	5.89016	3.54729	2.86908	7.70409	1.62081
811	25	0	1	3	0	0	1	0	0	0	0	1	2500	1	28.2612	23.2336	33.215	5.79169	4.63816	7.05522	3.97327	2.22078	4.16954	3.05595	1.83169	3.5109	7.54854	6.07895	9.2432	1.58954	1.34679	1.88319	28.2366	5.82836	3.45453	2.79951	7.62356	1.60651
812	25	0	2	1	0	0	1	0	0	0	0	1	3800	0	28.2612	23.2336	32.9155	5.79169	4.63816	7.02283	3.97327	2.22078	4.07843	3.05595	1.83169	3.41941	7.54854	6.07895	9.16809	1.58954	1.34679	1.87036	28.1367	5.81756	3.42416	2.76901	7.59852	1.60223
813	27	0	1	3	0	1	0	0	0	0	0	1	2990	1	28.2612	23.2336	33.215	5.79169	4.63816	7.05522	3.97327	2.22078	4.16954	3.05595	1.83169	3.5109	7.54854	6.07895	9.2432	1.58954	1.34679	1.88319	28.2366	5.82836	3.45453	2.79951	7.62356	1.60651
814	27	0	1	3	0	0	0	0	0	0	0	2	2500	0	28.2612	23.2336	32.6949	5.79169	4.63816	7.04756	3.97327	2.22078	4.04995	3.05595	1.83169	3.39724	7.54854	6.07895	9.12999	1.58954	1.34679	1.87576	28.0632	5.8258	3.41467	2.76162	7.58582	1.60403
815	28	0	1	2	0	0	1	0	0	0	0	1	2650	1	28.2612	23.2336	32.6684	5.79169	4.63816	6.9998	3.97327	2.22078	4.05058	3.05595	1.83169	3.39895	7.54854	6.07895	9.09601	1.58954	1.34679	1.8608	28.0544	5.80988	3.41488	2.76219	7.5745	1.59904
816	28	0	3	4	0	0	0	0	0	0	0	1	2900	0	28.2612	23.2336	35.0176	5.79169	4.63816	7.34248	3.97327	2.22078	4.6468	3.05595	1.83169	3.86779	7.54854	6.07895	9.67671	1.58954	1.34679	1.96096	28.8375	5.92411	3.61362	2.91847	7.76806	1.63243
817	30	0	1	3	0	0	1	0	0	0	0	2	3250	1	28.2612	23.2336	32.4927	5.79169	4.63816	6.99704	3.97327	2.22078	4.04871	3.05595	1.83169	3.40867	7.54854	6.07895	9.061	1.58954	1.34679	1.86016	27.9958	5.80896	3.41425	2.76543	7.56283	1.59883
818	30	0	1	1	0	0	0	0	0	0	0	1	4000	0	28.2612	23.2336	33.215	5.79169	4.63816	7.05522	3.97327	2.22078	4.16954	3.05595	1.83169	3.5109	7.54854	6.07895	9.2432	1.58954	1.34679	1.88319	28.2366	5.82836	3.45453	2.79951	7.62356	1.60651
819	27	0	2	3	0	0	0	0	0	0	0	2	2850	1	28.2686	23.3511	34.979	5.79279	4.65367	7.34836	3.96763	2.25455	4.6371	3.05488	1.85404	3.8656	7.54143	6.11667	9.66725	1.58958	1.35387	1.95829	28.8662	5.93161	3.61976	2.92484	7.77512	1.63391
820	27	0	1	2	0	0	1	0	0	0	0	1	2950	0	28.2686	23.3511	33.9853	5.79279	4.65367	7.203	3.96763	2.25455	4.41399	3.05488	1.85404	3.70768	7.54143	6.11667	9.41553	1.58958	1.35387	1.91075	28.535	5.88316	3.54539	2.8722	7.69121	1.61807
821	38	0	3	3	0	0	1	0	0	0	0	1	3250	1	28.5694	23.4401	33.7749	5.90357	4.66221	7.18173	3.92078	2.2699	4.30086	3.04737	1.8648	3.63372	7.63786	6.12457	9.42361	1.6164	1.35662	1.90778	28.5948	5.91583	3.49718	2.84863	7.72868	1.62693
822	38	0	2	3	0	1	1	0	1	0	0	2	2900	0	28.5694	23.4401	34.4139	5.90357	4.66221	7.29794	3.92078	2.2699	4.50358	3.04737	1.8648	3.78655	7.63786	6.12457	9.55563	1.6164	1.35662	1.9303	28.8078	5.95457	3.56476	2.89957	7.77269	1.63444
823	31	0	2	2	0	0	0	0	0	0	0	2	3250	1	28.4517	23.4286	33.6993	5.88696	4.6558	7.18388	3.89008	2.26026	4.26171	3.02974	1.8548	3.60306	7.605	6.12019	9.40687	1.61083	1.35504	1.90595	28.5265	5.90888	3.47068	2.8292	7.71069	1.62394
824	31	0	1	1	0	0	1	0	1	0	0	1	3300	0	28.4517	23.4286	35.2199	5.88696	4.6558	7.37163	3.89008	2.26026	4.7473	3.02974	1.8548	3.94951	7.605	6.12019	9.73837	1.61083	1.35504	1.96196	29.0334	5.97146	3.63255	2.94468	7.82119	1.64261
825	34	0	3	2	0	0	1	0	0	0	0	1	3100	0	28.3012	23.3632	35.4024	5.86933	4.6346	7.39255	3.84089	2.25079	4.8029	2.99796	1.84901	3.98825	7.57673	6.09206	9.78577	1.60783	1.34752	1.969	29.0223	5.96549	3.63152	2.94507	7.81819	1.64145
826	34	0	1	2	0	0	1	0	0	0	0	1	3900	1	28.3012	23.3632	33.8445	5.86933	4.6346	7.23891	3.84089	2.25079	4.24966	2.99796	1.84901	3.59034	7.57673	6.09206	9.47698	1.60783	1.34752	1.91954	28.503	5.91428	3.44711	2.81244	7.71525	1.62496
827	29	0	1	2	0	0	0	0	0	0	0	1	3000	1	28.1471	23.3541	34.5672	5.85287	4.63327	7.37505	3.77139	2.26018	4.38507	2.96011	1.85662	3.70365	7.53552	6.0957	9.6645	1.60426	1.34553	1.95537	28.6895	5.95373	3.47221	2.84013	7.76524	1.63506
828	29	0	1	1	0	0	1	0	0	0	0	2	3000	0	28.1471	23.3541	34.8257	5.85287	4.63327	7.40921	3.77139	2.26018	4.5089	2.96011	1.85662	3.80583	7.53552	6.0957	9.70804	1.60426	1.34553	1.96247	28.7756	5.96512	3.51349	2.87419	7.77975	1.63742
829	27	0	1	1	0	0	0	0	0	0	0	1	3350	1	28.1654	23.3848	35.8896	5.85471	4.64488	7.61434	3.7688	2.26986	4.73279	2.95982	1.86468	3.96782	7.53848	6.11398	9.97186	1.60478	1.35118	2.00716	29.1466	6.03798	3.59048	2.93077	7.87477	1.65438
830	27	0	3	3	0	0	0	0	1	0	0	2	3100	0	28.1654	23.3848	35.8896	5.85471	4.64488	7.61434	3.7688	2.26986	4.73279	2.95982	1.86468	3.96782	7.53848	6.11398	9.97186	1.60478	1.35118	2.00716	29.1466	6.03798	3.59048	2.93077	7.87477	1.65438
831	28	0	1	3	0	1	1	1	0	0	0	1	2350	1	28.1654	23.3848	36.2105	5.85471	4.64488	7.57778	3.7688	2.26986	4.90078	2.95982	1.86468	4.0721	7.53848	6.11398	10.0173	1.60478	1.35118	2.01175	29.2536	6.02579	3.64648	2.96554	7.88991	1.65591
832	28	0	3	1	0	0	0	0	0	0	0	2	3250	0	28.1654	23.3848	34.9561	5.85471	4.64488	7.44398	3.7688	2.26986	4.45025	2.95982	1.86468	3.75506	7.53848	6.11398	9.76829	1.60478	1.35118	1.97022	28.8354	5.98119	3.4963	2.85986	7.80691	1.64206
833	32	0	1	1	0	0	1	0	1	0	0	2	2750	1	28.1654	23.3848	36.7978	5.85471	4.64488	7.51261	3.7688	2.26986	5.11048	2.95982	1.86468	4.16182	7.53848	6.11398	10.1899	1.60478	1.35118	2.04012	29.4493	6.00407	3.71638	2.99544	7.94746	1.66536
834	32	0	1	2	0	1	1	1	0	0	0	1	3200	0	28.1654	23.3848	36.2742	5.85471	4.64488	7.64979	3.7688	2.26986	4.83329	2.95982	1.86468	4.04805	7.53848	6.11398	10.0621	1.60478	1.35118	2.0242	29.2748	6.04979	3.62399	2.95752	7.90485	1.66006
835	24	0	3	3	0	1	0	0	0	0	0	1	3050	1	28.1431	23.4014	35.421	5.84763	4.65267	7.51448	3.7656	2.27324	4.67515	2.95885	1.86579	3.93874	7.52592	6.13031	9.8224	1.60247	1.35601	1.97609	28.9885	6.00492	3.57133	2.92113	7.82621	1.64486
836	24	0	1	1	0	0	1	0	1	0	0	2	2900	0	28.1431	23.4014	35.3916	5.84763	4.65267	7.51282	3.7656	2.27324	4.6458	2.95885	1.86579	3.91603	7.52592	6.13031	9.82506	1.60247	1.35601	1.97565	28.9787	6.00437	3.56154	2.91355	7.8271	1.64471
837	28	0	1	2	0	0	1	0	1	0	0	2	3300	1	27.9222	23.4507	37.1643	5.80011	4.66702	7.61064	3.74397	2.27953	5.12196	2.93738	1.87031	4.18843	7.48022	6.14846	10.2939	1.58811	1.3608	2.05494	29.5124	6.02592	3.71515	2.9987	7.9742	1.66795
838	28	0	1	2	0	0	0	0	0	0	0	2	2700	0	27.9222	23.4507	36.9231	5.80011	4.66702	7.60617	3.74397	2.27953	5.04297	2.93738	1.87031	4.15148	7.48022	6.14846	10.227	1.58811	1.3608	2.04457	29.432	6.02443	3.68882	2.98639	7.95189	1.66449
839	31	0	1	3	0	0	1	0	0	0	0	2	3500	1	27.9222	23.4507	37.1717	5.80011	4.66702	7.56964	3.74397	2.27953	5.18726	2.93738	1.87031	4.22192	7.48022	6.14846	10.2827	1.58811	1.3608	2.05229	29.5149	6.01226	3.73692	3.00987	7.97047	1.66706
840	31	0	1	1	0	0	0	0	0	0	0	2	3300	0	27.9222	23.4507	37.2199	5.80011	4.66702	7.58783	3.74397	2.27953	5.18316	2.93738	1.87031	4.22174	7.48022	6.14846	10.3021	1.58811	1.3608	2.05635	29.5309	6.01832	3.73555	3.00981	7.97692	1.66842
841	32	0	1	1	0	0	1	0	0	0	0	2	2750	1	27.9222	23.4507	36.8793	5.80011	4.66702	7.51266	3.74397	2.27953	5.1593	2.93738	1.87031	4.19654	7.48022	6.14846	10.1884	1.58811	1.3608	2.03308	29.4174	5.99326	3.7276	3.00141	7.93903	1.66066
842	32	0	2	3	0	1	1	0	1	0	0	2	2920	0	27.9222	23.4507	37.3326	5.80011	4.66702	7.61582	3.74397	2.27953	5.19741	2.93738	1.87031	4.23664	7.48022	6.14846	10.3365	1.58811	1.3608	2.06294	29.5685	6.02765	3.7403	3.01478	7.9884	1.67062
843	29	0	3	3	0	0	0	0	0	0	0	1	3700	1	28.24	23.4564	37.0852	5.84676	4.6785	7.76029	3.74356	2.26706	5.08291	2.93389	1.8596	4.22962	7.56807	6.16533	10.2637	1.60827	1.35999	2.05275	29.5939	6.09518	3.69784	3.0077	7.99904	1.67367
844	29	0	3	3	0	0	1	0	0	0	0	1	3200	0	28.24	23.4564	36.734	5.84676	4.6785	7.38695	3.74356	2.26706	5.38882	2.93389	1.8596	4.31037	7.56807	6.16533	10.1173	1.60827	1.35999	1.99811	29.4768	5.97074	3.79981	3.03462	7.95022	1.65546
845	33	0	1	4	0	0	1	0	0	1	0	2	2500	1	28.24	23.4564	37.2694	5.84676	4.6785	7.59503	3.74356	2.26706	5.26244	2.93389	1.8596	4.28287	7.56807	6.16533	10.3047	1.60827	1.35999	2.05463	29.6553	6.0401	3.75769	3.02545	8.01271	1.6743
846	33	0	1	2	0	0	0	0	0	0	0	2	2950	0	28.24	23.4564	36.9963	5.84676	4.6785	7.67383	3.74356	2.26706	5.08407	2.93389	1.8596	4.20956	7.56807	6.16533	10.2513	1.60827	1.35999	2.04613	29.5642	6.06636	3.69823	3.00101	7.99491	1.67147
847	23	0	1	3	0	0	1	0	0	0	0	1	3400	1	28.4112	23.5817	37.4013	5.88126	4.71206	7.70344	3.76046	2.28344	5.16862	2.94917	1.87058	4.26049	7.60809	6.20935	10.367	1.61918	1.36681	2.06989	29.798	6.09892	3.73751	3.02674	8.0615	1.68529
848	23	0	1	3	0	0	1	0	0	0	0	1	2400	0	28.4112	23.5817	37.695	5.88126	4.71206	7.68049	3.76046	2.28344	5.31114	2.94917	1.87058	4.33016	7.60809	6.20935	10.4406	1.61918	1.36681	2.0813	29.896	6.09127	3.78501	3.04997	8.08602	1.6891
849	28	0	3	2	0	0	0	0	0	1	0	1	3350	1	28.4112	23.5817	36.7197	5.88126	4.71206	7.35811	3.76046	2.28344	5.43042	2.94917	1.87058	4.33543	7.60809	6.20935	10.1142	1.61918	1.36681	1.99332	29.5709	5.98381	3.82477	3.05172	7.97723	1.65977
850	28	0	2	1	0	0	1	0	1	0	0	1	3400	0	28.4112	23.5817	36.9332	5.88126	4.71206	7.46182	3.76046	2.28344	5.38121	2.94917	1.87058	4.31821	7.60809	6.20935	10.1615	1.61918	1.36681	2.01125	29.642	6.01838	3.80837	3.04598	7.99299	1.66575
851	26	0	1	2	0	0	1	0	0	0	0	2	2350	1	28.339	23.744	36.8403	5.86753	4.75141	7.27985	3.72608	2.29754	5.54046	2.92742	1.88043	4.38303	7.5988	6.26034	10.144	1.62054	1.37934	1.9915	29.6411	5.96627	3.8547	3.06363	8.00106	1.66379
852	26	0	1	3	0	0	1	0	0	0	0	1	2700	0	28.339	23.744	37.5135	5.86753	4.75141	7.71619	3.72608	2.29754	5.20055	2.92742	1.88043	4.28684	7.5988	6.26034	10.3979	1.62054	1.37934	2.06981	29.8655	6.11171	3.74139	3.03156	8.08567	1.6899
853	26	0	1	1	0	0	1	0	0	0	0	2	3500	1	28.339	23.744	37.7859	5.86753	4.75141	7.92423	3.72608	2.29754	5.17798	2.92742	1.88043	4.32541	7.5988	6.26034	10.4711	1.62054	1.37934	2.08796	29.9563	6.18106	3.73387	3.04442	8.11008	1.69595
854	26	0	1	2	0	0	1	0	0	0	0	1	2750	0	28.339	23.744	37.5135	5.86753	4.75141	7.71619	3.72608	2.29754	5.20055	2.92742	1.88043	4.28684	7.5988	6.26034	10.3979	1.62054	1.37934	2.06981	29.8655	6.11171	3.74139	3.03156	8.08567	1.6899
855	29	0	1	3	0	0	1	0	0	0	0	1	3600	1	28.339	23.744	37.7629	5.86753	4.75141	7.71951	3.72608	2.29754	5.28267	2.92742	1.88043	4.32443	7.5988	6.26034	10.4669	1.62054	1.37934	2.08053	29.9486	6.11282	3.76876	3.04409	8.1087	1.69347
856	29	0	1	3	0	0	1	0	0	1	0	1	3250	0	28.339	23.744	36.8695	5.86753	4.75141	7.3959	3.72608	2.29754	5.43941	2.92742	1.88043	4.3509	7.5988	6.26034	10.1511	1.62054	1.37934	1.99811	29.6508	6.00495	3.82101	3.05292	8.0034	1.666
857	32	0	1	1	0	0	1	0	0	0	0	2	3100	1	28.339	23.744	37.9343	5.86753	4.75141	7.72361	3.72608	2.29754	5.36094	2.92742	1.88043	4.37401	7.5988	6.26034	10.5101	1.62054	1.37934	2.08872	30.0058	6.11419	3.79485	3.06062	8.12307	1.6962
858	32	0	1	3	0	1	1	1	0	0	0	1	3000	0	28.339	23.744	37.0268	5.86753	4.75141	7.47022	3.72608	2.29754	5.41189	2.92742	1.88043	4.34214	7.5988	6.26034	10.1863	1.62054	1.37934	2.01049	29.7033	6.02972	3.81184	3.04999	8.01514	1.67013
859	27	0	1	4	0	0	1	0	0	0	0	1	3800	1	28.2655	23.794	37.4017	5.84529	4.7707	7.87719	3.66317	2.30493	5.10433	2.88889	1.88546	4.28331	7.58782	6.27629	10.3919	1.62025	1.38398	2.06799	29.8204	6.16439	3.69081	3.01922	8.08535	1.69074
860	27	0	1	2	0	0	1	0	0	0	0	1	3800	0	28.2655	23.794	37.268	5.84529	4.7707	7.57076	3.66317	2.30493	5.3431	2.88889	1.88546	4.33231	7.58782	6.27629	10.2924	1.62025	1.38398	2.03948	29.7759	6.06225	3.7704	3.03555	8.05218	1.68124
861	25	0	3	3	0	1	0	0	0	0	0	2	3150	1	27.84	23.9125	37.0306	5.75365	4.8038	7.44579	3.57762	2.31883	5.49186	2.83603	1.89484	4.39071	7.4716	6.31371	10.2046	1.59481	1.39244	2.00426	29.5944	6.00108	3.79611	3.04053	7.99663	1.66384
862	25	0	3	1	0	0	1	0	0	0	0	1	3100	0	27.84	23.9125	37.8513	5.75365	4.8038	7.73685	3.57762	2.31883	5.34395	2.83603	1.89484	4.37042	7.4716	6.31371	10.509	1.59481	1.39244	2.08146	29.8679	6.0981	3.7468	3.03376	8.09809	1.68957
863	27	0	2	2	0	0	0	0	1	0	0	2	2950	1	27.6546	24.1158	37.9128	5.71384	4.84886	7.95856	3.54034	2.35533	5.24928	2.81215	1.91843	4.38979	7.41574	6.37336	10.536	1.58327	1.40379	2.09115	29.8944	6.17375	3.71498	3.04012	8.10836	1.69274
864	27	0	3	1	0	0	1	0	0	0	0	2	2400	0	27.6546	24.1158	37.0995	5.71384	4.84886	7.48082	3.54034	2.35533	5.47697	2.81215	1.91843	4.39378	7.41574	6.37336	10.2273	1.58327	1.40379	2.01019	29.6233	6.01451	3.79088	3.04145	8.00546	1.66575
865	26	0	3	1	0	0	1	0	0	0	0	2	2650	1	27.4672	24.2264	37.3392	5.66646	4.87946	7.56604	3.51363	2.37098	5.40675	2.79482	1.92618	4.38751	7.34962	6.41591	10.317	1.57023	1.41133	2.03966	29.6776	6.03732	3.76379	3.03617	8.02751	1.67374
866	26	0	1	2	0	0	0	0	0	0	0	1	3100	0	27.4672	24.2264	36.8801	5.66646	4.87946	7.34702	3.51363	2.37098	5.58655	2.79482	1.92618	4.44644	7.34962	6.41591	10.1746	1.57023	1.41133	1.98676	29.5246	5.96431	3.82372	3.05581	7.98005	1.65611
867	27	0	1	3	0	0	0	0	0	0	0	2	2850	1	27.4672	24.2264	37.3392	5.66646	4.87946	7.56604	3.51363	2.37098	5.40675	2.79482	1.92618	4.38751	7.34962	6.41591	10.317	1.57023	1.41133	2.03966	29.6776	6.03732	3.76379	3.03617	8.02751	1.67374
868	27	0	3	1	0	0	0	0	0	0	0	1	3400	0	27.4672	24.2264	36.9988	5.66646	4.87946	7.41074	3.51363	2.37098	5.53166	2.79482	1.92618	4.42661	7.34962	6.41591	10.207	1.57023	1.41133	1.99905	29.5641	5.98555	3.80542	3.0492	7.99084	1.6602
869	28	0	1	3	0	0	0	0	0	0	0	2	3250	1	27.3563	24.3386	38.0516	5.63636	4.90937	7.77223	3.50107	2.38667	5.41285	2.78682	1.9335	4.44035	7.30784	6.45663	10.5761	1.56252	1.41879	2.08945	29.9155	6.10598	3.76686	3.05355	8.11354	1.69025
870	28	0	1	3	0	0	1	0	0	0	0	2	3050	0	27.3563	24.3386	37.4156	5.63636	4.90937	7.79303	3.50107	2.38667	5.27218	2.78682	1.9335	4.39647	7.30784	6.45663	10.3675	1.56252	1.41879	2.05166	29.7035	6.11292	3.71997	3.03893	8.04398	1.67766
871	32	0	1	1	0	1	0	1	0	0	0	2	3100	1	27.3032	24.4892	37.5221	5.62113	4.94813	7.78062	3.49467	2.40347	5.30058	2.78372	1.9437	4.41726	7.28659	6.50421	10.4128	1.55876	1.42824	2.05693	29.7715	6.11663	3.73291	3.04822	8.06788	1.68131
872	32	0	3	3	0	0	1	0	1	0	0	1	3450	0	27.3032	24.4892	37.3803	5.62113	4.94813	7.54457	3.49467	2.40347	5.52298	2.78372	1.9437	4.4568	7.28659	6.50421	10.3089	1.55876	1.42824	2.02696	29.7242	6.03794	3.80704	3.06141	8.03323	1.67132
873	25	0	1	2	0	1	1	0	0	0	0	2	3190	1	27.3036	24.4992	37.8205	5.61745	4.94981	7.66221	3.48305	2.40962	5.51602	2.77315	1.94645	4.48662	7.28013	6.51001	10.4618	1.55926	1.42732	2.06256	29.8744	6.07649	3.8029	3.06874	8.08397	1.68305
874	25	0	3	1	0	0	1	0	0	0	0	2	3250	0	27.3036	24.4992	38.5904	5.61745	4.94981	7.83476	3.48305	2.40962	5.57622	2.77315	1.94645	4.56176	7.28013	6.51001	10.7245	1.55926	1.42732	2.11516	30.1311	6.134	3.82297	3.09379	8.17154	1.70058
875	29	0	3	2	0	0	1	0	0	0	0	1	3350	1	27.3036	24.4992	37.2773	5.61745	4.94981	7.43011	3.48305	2.40962	5.65528	2.77315	1.94645	4.51967	7.28013	6.51001	10.2908	1.55926	1.42732	2.00692	29.6934	5.99912	3.84932	3.07976	8.02696	1.6645
876	29	0	1	3	0	0	1	0	0	0	0	2	3000	0	27.3036	24.4992	37.5917	5.61745	4.94981	7.33552	3.48305	2.40962	5.79087	2.77315	1.94645	4.57051	7.28013	6.51001	10.3953	1.55926	1.42732	2.02797	29.7982	5.96759	3.89452	3.0967	8.0618	1.67152
877	33	0	2	3	0	0	0	0	0	0	0	1	3150	1	27.3036	24.4992	37.5341	5.61745	4.94981	7.54723	3.48305	2.40962	5.60967	2.77315	1.94645	4.50777	7.28013	6.51001	10.3497	1.55926	1.42732	2.02721	29.779	6.03816	3.83412	3.07579	8.0466	1.67126
878	33	0	1	1	0	0	0	0	0	0	0	1	3150	0	27.3036	24.4992	38.3868	5.61745	4.94981	7.42078	3.48305	2.40962	5.96029	2.77315	1.94645	4.66517	7.28013	6.51001	10.6134	1.55926	1.42732	2.07278	30.0632	5.99601	3.95099	3.12826	8.1345	1.68646
879	34	0	1	3	0	0	0	0	0	0	0	1	3650	1	27.5131	24.4006	37.6262	5.65021	4.94333	7.57587	3.49943	2.40802	5.5866	2.78426	1.94592	4.5074	7.32611	6.49306	10.3787	1.56717	1.42245	2.03628	29.8466	6.05647	3.83135	3.07919	8.06597	1.6753
880	34	0	1	3	0	0	1	0	0	0	0	2	2500	0	27.5131	24.4006	38.4647	5.65021	4.94333	7.7805	3.49943	2.40802	5.58208	2.78426	1.94592	4.55787	7.32611	6.49306	10.6789	1.56717	1.42245	2.10362	30.1261	6.12468	3.82984	3.09602	8.16601	1.69775
881	28	0	3	2	0	0	0	0	0	0	0	1	2900	1	28.1545	24.2553	37.7962	5.7603	4.94781	7.56514	3.55552	2.42338	5.67367	2.82625	1.97385	4.54081	7.49601	6.46153	10.4273	1.60263	1.41578	2.03444	30.0687	6.09108	3.88419	3.11363	8.12828	1.68428
882	28	0	3	3	0	0	1	0	0	0	0	1	3500	0	28.1545	24.2553	38.7701	5.7603	4.94781	7.82981	3.55552	2.42338	5.62237	2.82625	1.97385	4.57761	7.49601	6.46153	10.7789	1.60263	1.41578	2.11822	30.3933	6.17931	3.86709	3.1259	8.24548	1.71221
883	29	0	3	3	0	1	0	1	0	0	0	2	3400	1	28.1545	24.2553	38.1936	5.7603	4.94781	7.37817	3.55552	2.42338	5.93745	2.82625	1.97385	4.64679	7.49601	6.46153	10.5656	1.60263	1.41578	2.05446	30.2011	6.02876	3.97212	3.14896	8.17438	1.69096
884	29	0	1	1	0	0	0	0	1	0	0	1	3600	0	28.1545	24.2553	38.1095	5.7603	4.94781	7.68599	3.55552	2.42338	5.57967	2.82625	1.97385	4.52063	7.49601	6.46153	10.5485	1.60263	1.41578	2.0717	30.1731	6.13137	3.85286	3.10691	8.16868	1.6967
885	32	0	3	3	0	0	0	0	0	0	0	2	3100	1	28.1545	24.2553	37.5214	5.7603	4.94781	7.34345	3.55552	2.42338	5.79558	2.82625	1.97385	4.56972	7.49601	6.46153	10.3593	1.60263	1.41578	2.01108	29.977	6.01719	3.92483	3.12327	8.10562	1.6765
886	32	0	3	3	0	0	0	0	0	0	0	1	3550	0	28.1545	24.2553	37.5986	5.7603	4.94781	7.4787	3.55552	2.42338	5.69797	2.82625	1.97385	4.54555	7.49601	6.46153	10.3812	1.60263	1.41578	2.01982	30.0028	6.06227	3.89229	3.11522	8.11292	1.67941
887	26	0	1	1	0	0	1	0	0	0	0	1	3000	1	28.3172	24.2853	38.2613	5.79968	4.95058	7.71066	3.57713	2.42911	5.60692	2.84671	1.97722	4.53919	7.55418	6.46122	10.5925	1.61403	1.41262	2.08194	30.2879	6.15364	3.87105	3.12104	8.20264	1.70286
888	26	0	1	1	0	0	1	0	0	0	0	2	2750	0	28.3172	24.2853	37.5835	5.79968	4.95058	7.42699	3.57713	2.42911	5.7795	2.84671	1.97722	4.58108	7.55418	6.46122	10.3788	1.61403	1.41262	2.01443	30.062	6.05909	3.92858	3.13501	8.13141	1.68036
889	24	0	3	1	0	0	1	0	0	0	0	2	3400	1	28.4846	24.3545	37.5534	5.8423	4.96339	7.39298	3.60237	2.44224	5.79653	2.87055	1.99084	4.57722	7.60666	6.48193	10.3697	1.62471	1.41494	2.01199	30.1308	6.06622	3.94704	3.1462	8.15276	1.68388
890	24	0	3	1	0	0	0	0	0	1	0	1	2500	0	28.4846	24.3545	37.5635	5.8423	4.96339	7.36898	3.60237	2.44224	5.80493	2.87055	1.99084	4.57645	7.60666	6.48193	10.3725	1.62471	1.41494	2.01429	30.1342	6.05822	3.94984	3.14595	8.15369	1.68464
891	27	0	1	1	0	0	1	0	0	0	0	1	3350	1	28.4846	24.3545	38.3684	5.8423	4.96339	7.72285	3.60237	2.44224	5.62261	2.87055	1.99084	4.5421	7.60666	6.48193	10.6193	1.62471	1.41494	2.08775	30.4025	6.17618	3.88907	3.1345	8.23595	1.70913
892	27	0	2	1	0	0	1	0	0	0	0	1	3100	0	28.4846	24.3545	38.8705	5.8423	4.96339	7.45622	3.60237	2.44224	6.07429	2.87055	1.99084	4.72137	7.60666	6.48193	10.7518	1.62471	1.41494	2.09408	30.5699	6.0873	4.03963	3.19425	8.28012	1.71124
893	28	0	1	2	0	0	1	0	0	0	0	2	2950	1	28.4846	24.3545	37.73	5.8423	4.96339	7.36668	3.60237	2.44224	5.83801	2.87055	1.99084	4.58947	7.60666	6.48193	10.4156	1.62471	1.41494	2.02341	30.1897	6.05745	3.96087	3.15029	8.16807	1.68768
894	28	0	1	3	0	1	0	1	0	0	0	2	3400	0	28.4846	24.3545	38.0524	5.8423	4.96339	7.62513	3.60237	2.44224	5.66535	2.87055	1.99084	4.54039	7.60666	6.48193	10.5002	1.62471	1.41494	2.0572	30.2972	6.1436	3.90332	3.13392	8.19625	1.69895
895	35	0	1	1	0	1	1	0	0	0	0	2	3200	1	28.4846	24.3545	37.739	5.8423	4.96339	7.46989	3.60237	2.44224	5.76121	2.87055	1.99084	4.57221	7.60666	6.48193	10.4225	1.62471	1.41494	2.02613	30.1927	6.09186	3.93527	3.14453	8.17037	1.68859
896	35	0	1	3	0	1	0	0	0	0	0	2	3000	0	28.4846	24.3545	39.2313	5.8423	4.96339	7.9124	3.60237	2.44224	5.694	2.87055	1.99084	4.62643	7.60666	6.48193	10.9119	1.62471	1.41494	2.14595	30.6901	6.23936	3.91287	3.16261	8.3335	1.72853
897	35	0	1	3	0	1	0	0	0	0	0	2	3250	1	28.5012	24.2494	39.0937	5.846	4.93881	7.4906	3.56979	2.42992	6.11302	2.84985	1.98238	4.74729	7.63747	6.44905	10.8154	1.63238	1.40869	2.10561	30.6148	6.0918	4.03758	3.19317	8.30065	1.71556
898	35	0	2	2	0	1	1	1	1	0	0	2	3250	0	28.5012	24.2494	38.0273	5.846	4.93881	7.38617	3.56979	2.42992	5.89443	2.84985	1.98238	4.62444	7.63747	6.44905	10.5049	1.63238	1.40869	2.04069	30.2593	6.05699	3.96472	3.15222	8.19713	1.69392
899	24	0	1	1	0	0	1	0	0	0	0	2	3700	1	28.2784	24.2494	39.84	5.80125	4.9369	7.61062	3.49655	2.42994	6.11827	2.79428	1.98313	4.74634	7.59916	6.44512	11.0103	1.6266	1.4063	2.14255	30.7893	6.11626	4.01492	3.17458	8.35153	1.72515
900	24	0	3	1	0	0	0	0	0	0	0	2	3350	0	28.2784	24.2494	38.5151	5.80125	4.9369	7.67804	3.49655	2.42994	5.80134	2.79428	1.98313	4.62394	7.59916	6.44512	10.626	1.6266	1.4063	2.07185	30.3476	6.13873	3.90928	3.13378	8.22341	1.70158
901	30	0	3	3	0	0	1	0	1	0	0	1	4250	1	28.2784	24.2494	38.2372	5.80125	4.9369	7.41873	3.49655	2.42994	5.93645	2.79428	1.98313	4.656	7.59916	6.44512	10.5629	1.6266	1.4063	2.04996	30.255	6.05229	3.95431	3.14447	8.20238	1.69429
902	30	0	1	2	0	0	1	0	0	1	0	1	3300	0	28.2784	24.2494	38.1941	5.80125	4.9369	7.54454	3.49655	2.42994	5.84348	2.79428	1.98313	4.63226	7.59916	6.44512	10.5503	1.6266	1.4063	2.04783	30.2407	6.09423	3.92332	3.13656	8.19818	1.69358
903	38	1	3	1	0	1	1	0	0	0	0	1	3500	1	27.4005	24.5353	38.8814	5.61028	5.00464	7.7775	3.30758	2.48028	5.76932	2.63717	2.0183	4.64541	7.34128	6.5444	10.729	1.57588	1.41984	2.11064	30.2724	6.13081	3.8524	3.1003	8.20488	1.70212
904	38	0	1	3	0	1	0	0	0	0	0	1	2050	0	27.4005	24.5353	40.0938	5.61028	5.00464	7.61603	3.30758	2.48028	6.3707	2.63717	2.0183	4.86951	7.34128	6.5444	10.9774	1.57588	1.41984	2.12983	30.6765	6.07698	4.05285	3.17499	8.2877	1.70852
905	25	0	1	4	0	0	1	0	0	0	0	2	3400	1	27.1093	24.9713	38.2647	5.53854	5.11838	7.42904	3.2179	2.5621	5.98989	2.57559	2.08229	4.69434	7.23759	6.69837	10.541	1.55772	1.44535	2.05066	30.1151	6.02865	3.9233	3.11741	8.15899	1.68458
906	25	0	2	2	0	0	1	0	0	0	0	1	2950	0	27.1093	24.9713	38.2647	5.53854	5.11838	7.42904	3.2179	2.5621	5.98989	2.57559	2.08229	4.69434	7.23759	6.69837	10.541	1.55772	1.44535	2.05066	30.1151	6.02865	3.9233	3.11741	8.15899	1.68458
907	25	0	1	4	0	0	1	0	0	0	0	1	3350	1	27.1093	24.9713	40.2463	5.53854	5.11838	7.57045	3.2179	2.5621	6.63741	2.57559	2.08229	4.98226	7.23759	6.69837	10.8942	1.55772	1.44535	2.10457	30.7756	6.07579	4.13914	3.21338	8.27673	1.70255
908	25	0	3	4	0	0	1	0	0	0	0	1	3350	0	27.1093	24.9713	38.5838	5.53854	5.11838	7.42734	3.2179	2.5621	6.04989	2.57559	2.08229	4.72701	7.23759	6.69837	10.6544	1.55772	1.44535	2.07545	30.2214	6.02808	3.9433	3.1283	8.19678	1.69284
909	27	0	1	1	0	0	0	0	0	0	0	2	2700	1	27.1093	24.9713	38.2647	5.53854	5.11838	7.42904	3.2179	2.5621	5.98989	2.57559	2.08229	4.69434	7.23759	6.69837	10.541	1.55772	1.44535	2.05066	30.1151	6.02865	3.9233	3.11741	8.15899	1.68458
910	27	0	3	1	0	0	1	0	0	0	0	1	3400	0	27.1093	24.9713	38.2647	5.53854	5.11838	7.42904	3.2179	2.5621	5.98989	2.57559	2.08229	4.69434	7.23759	6.69837	10.541	1.55772	1.44535	2.05066	30.1151	6.02865	3.9233	3.11741	8.15899	1.68458
911	30	0	1	1	0	0	1	0	0	0	0	2	3550	1	26.9307	25.3373	39.925	5.50166	5.20366	7.54189	3.1827	2.62524	6.4239	2.54886	2.14061	4.87688	7.17469	6.8106	10.8704	1.5471	1.46651	2.11094	30.731	6.0824	4.07728	3.18878	8.28524	1.70819
912	30	0	1	3	0	0	1	0	0	0	0	1	3750	0	26.9307	25.3373	40.0812	5.50166	5.20366	7.57858	3.1827	2.62524	6.38853	2.54886	2.14061	4.85759	7.17469	6.8106	10.9689	1.5471	1.46651	2.13036	30.7831	6.09463	4.06549	3.18236	8.31807	1.71466
913	27	0	1	3	0	0	1	0	0	0	0	1	2900	1	26.6403	25.6391	39.9214	5.44941	5.27186	7.50828	3.12655	2.68081	6.47837	2.50139	2.19178	4.88007	7.0778	6.90747	10.8193	1.53133	1.48193	2.10134	30.7336	6.07651	4.09524	3.19108	8.2682	1.70486
914	27	0	1	2	0	0	1	0	1	1	0	2	3700	0	26.6403	25.6391	38.6609	5.44941	5.27186	7.36924	3.12655	2.68081	6.10863	2.50139	2.19178	4.72188	7.0778	6.90747	10.6595	1.53133	1.48193	2.07762	30.3134	6.03017	3.972	3.13835	8.21492	1.69696
915	29	0	3	1	0	0	1	0	1	0	0	1	3550	1	26.6403	25.6391	39.4988	5.44941	5.27186	7.49292	3.12655	2.68081	6.18689	2.50139	2.19178	4.7577	7.0778	6.90747	10.8936	1.53133	1.48193	2.12614	30.5927	6.0714	3.99808	3.15029	8.29294	1.71313
916	29	0	1	2	1	0	1	0	1	0	0	2	2650	0	26.6403	25.6391	38.6609	5.44941	5.27186	7.36924	3.12655	2.68081	6.10863	2.50139	2.19178	4.72188	7.0778	6.90747	10.6595	1.53133	1.48193	2.07762	30.3134	6.03017	3.972	3.13835	8.21492	1.69696
917	30	0	3	1	0	0	1	0	0	0	0	1	3150	1	26.6403	25.6391	39.4988	5.44941	5.27186	7.49292	3.12655	2.68081	6.18689	2.50139	2.19178	4.7577	7.0778	6.90747	10.8936	1.53133	1.48193	2.12614	30.5927	6.0714	3.99808	3.15029	8.29294	1.71313
918	30	0	1	2	0	1	0	0	1	1	0	1	3150	0	26.6403	25.6391	38.6609	5.44941	5.27186	7.36924	3.12655	2.68081	6.10863	2.50139	2.19178	4.72188	7.0778	6.90747	10.6595	1.53133	1.48193	2.07762	30.3134	6.03017	3.972	3.13835	8.21492	1.69696
919	25	0	3	1	1	0	1	0	0	0	0	2	3950	1	26.4763	26.1171	39.2025	5.41313	5.40344	7.32481	3.00407	2.80264	6.38276	2.41088	2.31287	4.77886	7.04754	7.08808	10.5951	1.52865	1.50598	2.06076	30.5986	6.04712	4.06316	3.16754	8.24358	1.69847
920	25	0	1	3	0	0	1	0	0	0	0	2	2650	0	26.4763	26.1171	39.1869	5.41313	5.40344	7.32777	3.00407	2.80264	6.35625	2.41088	2.31287	4.7746	7.04754	7.08808	10.6161	1.52865	1.50598	2.06445	30.5935	6.04811	4.05432	3.16612	8.25056	1.69969
921	25	0	1	3	0	0	1	0	0	0	0	1	3150	1	26.4354	26.4376	38.9313	5.40744	5.47506	7.26739	3.00228	2.86303	6.28777	2.40865	2.36243	4.72365	7.03612	7.18864	10.5707	1.52725	1.5219	2.05873	30.6014	6.04997	4.05103	3.16491	8.26514	1.70263
922	25	0	1	3	0	0	1	0	0	0	0	2	2750	0	26.4354	26.4376	39.0771	5.40744	5.47506	7.29212	3.00228	2.86303	6.29212	2.40865	2.36243	4.72522	7.03612	7.18864	10.6274	1.52725	1.5219	2.07022	30.6501	6.05821	4.05248	3.16543	8.28406	1.70646
923	27	0	3	3	0	0	0	0	0	0	0	2	3250	1	26.4354	26.4376	39.2112	5.40744	5.47506	7.2689	3.00228	2.86303	6.55606	2.40865	2.36243	4.84774	7.03612	7.18864	10.5352	1.52725	1.5219	2.03916	30.6948	6.05047	4.14046	3.20627	8.25332	1.69611
924	27	0	3	2	0	0	1	0	1	1	0	1	3100	0	26.4354	26.4376	38.5422	5.40744	5.47506	7.23149	3.00228	2.86303	6.08523	2.40865	2.36243	4.63698	7.03612	7.18864	10.5762	1.52725	1.5219	2.07073	30.4718	6.038	3.98351	3.13602	8.26699	1.70663
925	29	0	3	1	0	0	1	0	0	0	0	2	2700	1	26.3631	26.5652	38.3752	5.38576	5.5058	7.18486	2.99375	2.88116	6.14588	2.40241	2.36986	4.68653	7.01306	7.22945	10.532	1.521	1.52868	2.06305	30.4345	6.02547	4.00693	3.15294	8.25816	1.70424
926	29	0	1	2	0	0	0	0	0	0	0	1	2550	0	26.3631	26.5652	39.3477	5.38576	5.5058	7.32829	2.99375	2.88116	6.34418	2.40241	2.36986	4.7725	7.01306	7.22945	10.7137	1.521	1.52868	2.08887	30.7586	6.07328	4.07303	3.18159	8.31872	1.71285
927	32	0	1	4	0	0	1	0	0	0	0	2	2950	1	26.3631	26.5652	39.0261	5.38576	5.5058	7.25185	2.99375	2.88116	6.45161	2.40241	2.36986	4.80703	7.01306	7.22945	10.4928	1.521	1.52868	2.0404	30.6514	6.0478	4.10884	3.1931	8.24512	1.69669
928	32	0	1	2	0	0	0	0	1	0	0	2	3050	0	26.3631	26.5652	39.1151	5.38576	5.5058	7.27052	2.99375	2.88116	6.43397	2.40241	2.36986	4.807	7.01306	7.22945	10.5338	1.521	1.52868	2.05164	30.6811	6.05403	4.10296	3.19309	8.25877	1.70044
929	24	0	1	2	0	0	1	0	0	0	1	1	3500	1	26.5193	26.921	39.2298	5.41106	5.58844	7.28177	2.97516	2.93521	6.28824	2.38794	2.40919	4.76297	7.062	7.34057	10.7043	1.53289	1.54676	2.09283	30.89	6.09376	4.0662	3.1867	8.36897	1.72416
930	24	0	3	3	0	0	1	0	0	0	0	2	3000	0	26.5193	26.921	38.8245	5.41106	5.58844	7.23347	2.97516	2.93521	6.14117	2.38794	2.40919	4.68771	7.062	7.34057	10.6284	1.53289	1.54676	2.08217	30.755	6.07766	4.01718	3.16161	8.34365	1.72061
931	29	0	1	3	0	0	0	0	0	0	0	1	3000	1	26.5193	26.921	39.1108	5.41106	5.58844	7.24168	2.97516	2.93521	6.48293	2.38794	2.40919	4.84021	7.062	7.34057	10.5207	1.53289	1.54676	2.04928	30.8504	6.08039	4.1311	3.21245	8.30776	1.70965
932	29	0	1	1	0	0	1	0	0	0	0	2	3400	0	26.5193	26.921	38.9481	5.41106	5.58844	7.231	2.97516	2.93521	6.36869	2.38794	2.40919	4.78662	7.062	7.34057	10.5594	1.53289	1.54676	2.0575	30.7961	6.07683	4.09302	3.19458	8.32066	1.71239
933	25	0	1	1	0	0	0	0	0	0	0	1	3200	1	26.4135	27.0417	39.4986	5.39576	5.62033	7.22691	2.93245	2.95284	6.74302	2.36823	2.42159	4.96706	7.03816	7.37799	10.5969	1.53003	1.55322	2.05252	30.9846	6.081	4.20944	3.25229	8.3377	1.71192
934	25	0	1	3	0	0	1	0	0	0	0	2	3350	0	26.4135	27.0417	39.1115	5.39576	5.62033	7.24016	2.93245	2.95284	6.48454	2.36823	2.42159	4.84732	7.03816	7.37799	10.5362	1.53003	1.55322	2.05297	30.8556	6.08542	4.12328	3.21238	8.31744	1.71207
935	30	0	1	4	0	0	1	0	0	0	0	2	3050	1	26.4135	27.0417	39.3706	5.39576	5.62033	7.29753	2.93245	2.95284	6.33333	2.36823	2.42159	4.7951	7.03816	7.37799	10.7438	1.53003	1.55322	2.1003	30.9419	6.10454	4.07287	3.19497	8.38664	1.72785
936	30	0	3	2	0	1	1	1	0	0	0	2	3600	0	26.4135	27.0417	39.5661	5.39576	5.62033	7.24686	2.93245	2.95284	6.72784	2.36823	2.42159	4.96111	7.03816	7.37799	10.6166	1.53003	1.55322	2.05719	31.0071	6.08765	4.20438	3.25031	8.34426	1.71348
937	26	0	2	4	0	0	0	0	0	0	0	2	3100	1	25.8788	27.3072	39.1352	5.30909	5.68818	7.21269	2.80212	2.99157	6.56527	2.2945	2.45479	4.8779	6.9175	7.45708	10.5049	1.50971	1.57039	2.03925	30.7737	6.06999	4.11965	3.20906	8.29315	1.70645
938	26	0	3	2	0	0	1	0	0	0	0	2	3250	0	25.8788	27.3072	39.2743	5.30909	5.68818	7.19786	2.80212	2.99157	6.70244	2.2945	2.45479	4.93948	6.9175	7.45708	10.5319	1.50971	1.57039	2.03395	30.8201	6.06504	4.16538	3.22959	8.30217	1.70468
939	26	0	1	3	0	0	1	0	0	0	0	2	2950	1	25.5768	27.6035	38.917	5.24041	5.75873	7.19043	2.76474	3.03993	6.20897	2.27124	2.49348	4.72375	6.82101	7.5487	10.6468	1.49272	1.58649	2.08163	30.6991	6.06319	4.00455	3.16282	8.33884	1.72028
940	26	0	1	2	0	0	1	0	0	0	0	2	3000	0	25.5768	27.6035	38.4231	5.24041	5.75873	7.10137	2.76474	3.03993	6.26577	2.27124	2.49348	4.75966	6.82101	7.5487	10.531	1.49272	1.58649	2.05915	30.5345	6.0335	4.02348	3.17479	8.30023	1.71279
941	24	0	2	2	0	0	0	0	0	1	0	1	2500	1	25.0473	28.6398	39.1188	5.12423	5.98642	7.05568	2.71013	3.18276	6.86178	2.23045	2.59066	5.02096	6.6588	7.8569	10.4381	1.46219	1.64878	2.00539	30.9353	6.05544	4.25156	3.28069	8.31794	1.70545
942	24	0	1	1	0	0	1	0	0	0	0	1	3850	0	25.0473	28.6398	38.6343	5.12423	5.98642	7.03864	2.71013	3.18276	6.5926	2.23045	2.59066	4.89121	6.6588	7.8569	10.3378	1.46219	1.64878	1.99604	30.7738	6.04976	4.16183	3.23744	8.28449	1.70234
943	25	0	3	2	0	0	0	0	0	0	0	1	3150	1	24.9882	28.8575	40.1339	5.10981	6.04287	7.21604	2.70261	3.22105	7.15445	2.22308	2.6281	5.15949	6.63937	7.92258	10.6508	1.45834	1.66243	2.04023	31.3265	6.12291	4.35937	3.33689	8.40426	1.72033
944	25	0	1	1	0	0	1	0	0	0	0	1	2900	0	24.9882	28.8575	38.9117	5.10981	6.04287	7.03325	2.70261	3.22105	6.76205	2.22308	2.6281	4.96874	6.63937	7.92258	10.3882	1.45834	1.66243	1.99327	30.9191	6.06198	4.22857	3.27331	8.31671	1.70468
945	26	0	3	2	0	0	1	0	0	0	0	1	3300	1	24.9882	28.8575	38.0821	5.10981	6.04287	6.94581	2.70261	3.22105	6.25628	2.22308	2.6281	4.74774	6.63937	7.92258	10.408	1.45834	1.66243	2.02116	30.6426	6.03283	4.05998	3.19964	8.32332	1.71398
946	26	0	1	1	0	1	0	0	0	0	0	2	3060	0	24.9882	28.8575	38.9117	5.10981	6.04287	7.03325	2.70261	3.22105	6.76205	2.22308	2.6281	4.96874	6.63937	7.92258	10.3882	1.45834	1.66243	1.99327	30.9191	6.06198	4.22857	3.27331	8.31671	1.70468
947	27	0	3	3	0	1	0	1	0	0	0	2	3250	1	24.8595	29.048	39.5009	5.08196	6.08752	7.06584	2.67275	3.25574	6.89986	2.19776	2.66113	5.04393	6.60208	7.98551	10.5331	1.45522	1.67422	2.01596	31.1361	6.07844	4.27612	3.30094	8.37357	1.71513
948	27	0	3	1	0	0	0	0	0	0	0	2	3000	0	24.8595	29.048	40.2101	5.08196	6.08752	7.26416	2.67275	3.25574	7.06324	2.19776	2.66113	5.08154	6.60208	7.98551	10.7295	1.45522	1.67422	2.05384	31.3725	6.14454	4.33058	3.31348	8.43902	1.72776
949	28	0	1	1	0	0	1	0	0	0	0	2	2800	1	24.2523	29.3112	40.0807	4.96192	6.15407	7.17015	2.57847	3.3079	6.88266	2.13581	2.71483	5.08276	6.39801	8.08645	10.7353	1.42599	1.6837	2.05468	31.2147	6.09538	4.25634	3.31113	8.40657	1.72146
950	28	0	3	2	0	0	1	0	0	0	0	1	3300	0	24.2523	29.3112	41.4268	4.96192	6.15407	7.41534	2.57847	3.3079	7.3863	2.13581	2.71483	5.2818	6.39801	8.08645	10.9919	1.42599	1.6837	2.09574	31.6634	6.17711	4.42422	3.37748	8.49211	1.73514
951	31	0	1	3	0	0	0	0	0	0	0	2	3150	1	24.2523	29.3112	41.5304	4.96192	6.15407	7.36912	2.57847	3.3079	7.51608	2.13581	2.71483	5.36864	6.39801	8.08645	10.9767	1.42599	1.6837	2.08579	31.698	6.1617	4.46748	3.40643	8.48704	1.73183
952	31	0	3	1	0	0	0	0	0	0	0	2	2800	0	24.2523	29.3112	39.6531	4.96192	6.15407	7.14999	2.57847	3.3079	7.01418	2.13581	2.71483	5.01701	6.39801	8.08645	10.5948	1.42599	1.6837	2.02983	31.0722	6.08866	4.30018	3.28922	8.35976	1.71317
953	26	0	1	2	0	0	0	0	0	0	0	1	2550	1	24.1467	29.3554	40.9804	4.93999	6.15958	7.24618	2.56818	3.31743	7.36555	2.1291	2.72063	5.30127	6.367	8.09983	10.8637	1.42123	1.68307	2.06535	31.4942	6.11525	4.41705	3.38367	8.4435	1.72322
954	26	0	3	2	0	0	1	0	0	0	0	2	3300	0	24.1467	29.3554	41.375	4.93999	6.15958	7.33295	2.56818	3.31743	7.47665	2.1291	2.72063	5.3587	6.367	8.09983	10.9333	1.42123	1.68307	2.0788	31.6257	6.14418	4.45409	3.40281	8.4667	1.7277
955	28	0	3	2	0	1	1	1	0	0	0	1	2550	1	24.1467	29.3554	41.8305	4.93999	6.15958	7.44121	2.56818	3.31743	7.5546	2.1291	2.72063	5.39548	6.367	8.09983	11.0748	1.42123	1.68307	2.10766	31.7776	6.18026	4.48007	3.41507	8.51388	1.73732
956	28	0	1	1	0	1	1	0	0	0	0	1	3250	0	24.1467	29.3554	40.8646	4.93999	6.15958	7.34637	2.56818	3.31743	7.21546	2.1291	2.72063	5.15978	6.367	8.09983	10.9032	1.42123	1.68307	2.08438	31.4556	6.14865	4.36702	3.33651	8.45669	1.72956
957	30	0	1	2	0	0	1	0	0	0	0	2	3200	1	24.1467	29.3554	41.375	4.93999	6.15958	7.33295	2.56818	3.31743	7.47665	2.1291	2.72063	5.3587	6.367	8.09983	10.9333	1.42123	1.68307	2.0788	31.6257	6.14418	4.45409	3.40281	8.4667	1.7277
958	30	0	1	3	0	1	0	0	0	0	0	1	3900	0	24.1467	29.3554	41.8305	4.93999	6.15958	7.44121	2.56818	3.31743	7.5546	2.1291	2.72063	5.39548	6.367	8.09983	11.0748	1.42123	1.68307	2.10766	31.7776	6.18026	4.48007	3.41507	8.51388	1.73732
959	31	0	1	3	1	0	0	0	0	0	0	1	3000	1	24.252	29.4577	40.3055	4.96542	6.18195	7.23791	2.58124	3.34122	7.14893	2.13401	2.74281	5.1093	6.40095	8.12804	10.7678	1.42802	1.68588	2.06524	31.3384	6.12843	4.35713	3.32871	8.43228	1.72638
960	31	0	3	1	0	1	1	0	0	1	0	1	3070	0	24.252	29.4577	41.3314	4.96542	6.18195	7.30144	2.58124	3.34122	7.50153	2.13401	2.74281	5.37174	6.40095	8.12804	10.9094	1.42802	1.68588	2.07511	31.6803	6.1496	4.47467	3.41619	8.47947	1.72967
961	30	0	2	2	0	0	1	0	0	0	0	2	3250	1	24.4218	29.4488	40.4584	4.97502	6.20362	7.14496	2.62275	3.33018	7.2319	2.16088	2.74132	5.2504	6.45638	8.12231	10.7225	1.43627	1.68231	2.04163	31.443	6.10786	4.39494	3.3842	8.43373	1.72007
962	30	0	1	3	0	0	1	0	0	0	0	1	3750	0	24.4218	29.4488	41.7804	4.97502	6.20362	7.3864	2.62275	3.33018	7.60788	2.16088	2.74132	5.42234	6.45638	8.12231	11.0353	1.43627	1.68231	2.10185	31.8837	6.18834	4.52027	3.44151	8.53799	1.74014
963	27	0	1	1	0	0	0	0	0	0	0	2	3250	1	24.4997	29.5442	39.5319	4.98148	6.23121	7.13766	2.62574	3.36169	6.99605	2.15919	2.77575	4.98897	6.47989	8.14904	10.5765	1.43861	1.68732	2.04046	31.1919	6.11678	4.32783	3.30797	8.40181	1.72213
964	27	0	1	3	0	1	1	1	0	0	0	2	2850	0	24.4997	29.5442	41.1906	4.98148	6.23121	7.3438	2.62574	3.36169	7.3413	2.15919	2.77575	5.22491	6.47989	8.14904	10.9587	1.43861	1.68732	2.09668	31.7448	6.1855	4.44291	3.38661	8.52922	1.74087
965	29	0	3	1	0	1	1	1	1	0	0	1	2250	1	24.6	29.767	39.5277	4.98081	6.29961	7.02963	2.61633	3.42854	7.11255	2.14711	2.84225	5.04549	6.4984	8.21853	10.5118	1.43768	1.70265	2.01496	31.2982	6.10335	4.38581	3.34495	8.40959	1.71843
966	29	0	1	1	0	0	1	0	0	1	0	1	3000	0	24.6	29.767	39.5277	4.98081	6.29961	7.02963	2.61633	3.42854	7.11255	2.14711	2.84225	5.04549	6.4984	8.21853	10.5118	1.43768	1.70265	2.01496	31.2982	6.10335	4.38581	3.34495	8.40959	1.71843
967	25	0	1	3	0	0	1	0	0	0	0	1	3650	0	24.5832	29.7999	39.9045	4.96943	6.31776	7.09818	2.57736	3.46844	7.17027	2.12387	2.87551	5.06789	6.49949	8.22779	10.6411	1.43712	1.7044	2.04268	31.4292	6.12846	4.40536	3.35576	8.45613	1.72807
968	25	0	3	2	0	0	1	0	0	0	0	1	3150	1	24.5832	29.7999	41.8191	4.96943	6.31776	7.38931	2.57736	3.46844	7.49247	2.12387	2.87551	5.28981	6.49949	8.22779	11.1128	1.43712	1.7044	2.12158	32.0674	6.2255	4.51275	3.42973	8.61335	1.75437
969	28	0	3	3	0	1	1	1	0	0	0	2	3330	1	24.5832	29.7999	41.8191	4.96943	6.31776	7.38931	2.57736	3.46844	7.49247	2.12387	2.87551	5.28981	6.49949	8.22779	11.1128	1.43712	1.7044	2.12158	32.0674	6.2255	4.51275	3.42973	8.61335	1.75437
970	28	0	1	3	0	0	1	0	0	0	0	2	3000	0	24.5832	29.7999	39.6476	4.96943	6.31776	7.1103	2.57736	3.46844	7.03908	2.12387	2.87551	4.9843	6.49949	8.22779	10.6011	1.43712	1.7044	2.04284	31.3436	6.1325	4.36163	3.32789	8.44278	1.72812
971	34	0	1	1	0	1	1	1	0	0	0	2	3150	1	24.5832	29.7999	41.9784	4.96943	6.31776	7.40793	2.57736	3.46844	7.53244	2.12387	2.87551	5.31924	6.49949	8.22779	11.1429	1.43712	1.7044	2.12682	32.1205	6.23171	4.52608	3.43954	8.62338	1.75611
972	34	0	1	2	0	1	1	0	0	0	0	2	3430	0	24.5832	29.7999	41.6038	4.96943	6.31776	7.20248	2.57736	3.46844	7.61364	2.12387	2.87551	5.40569	6.49949	8.22779	10.9731	1.43712	1.7044	2.08262	31.9956	6.16322	4.55315	3.46836	8.56681	1.74138
973	23	0	1	1	0	0	0	0	0	0	0	2	3150	1	24.1769	29.9113	41.5984	4.8845	6.33899	7.33142	2.51235	3.51436	7.47095	2.08103	2.91927	5.25012	6.35848	8.2639	11.0668	1.41261	1.70616	2.11398	31.8955	6.18497	4.49922	3.41681	8.56307	1.74425
974	23	1	3	1	0	0	0	0	0	0	0	1	3900	0	24.1769	29.9113	40.8357	4.8845	6.33899	7.21641	2.51235	3.51436	7.34904	2.08103	2.91927	5.1641	6.35848	8.2639	10.8758	1.41261	1.70616	2.08158	31.6413	6.14663	4.45858	3.38813	8.4994	1.73345
975	26	0	1	3	0	0	0	0	0	0	0	2	2800	1	24.1769	29.9113	43.0143	4.8845	6.33899	7.48232	2.51235	3.51436	7.92463	2.08103	2.91927	5.55607	6.35848	8.2639	11.3338	1.41261	1.70616	2.15207	32.3675	6.23527	4.65045	3.51879	8.65206	1.75695
976	26	0	3	3	0	0	0	0	0	1	0	1	3300	0	24.1769	29.9113	40.324	4.8845	6.33899	7.2104	2.51235	3.51436	7.18133	2.08103	2.91927	5.06244	6.35848	8.2639	10.7821	1.41261	1.70616	2.0759	31.4707	6.14463	4.40268	3.35425	8.46815	1.73156
977	25	0	1	2	0	0	0	0	0	1	0	1	3250	1	23.8137	31.2498	39.8527	4.77048	6.58573	7.1094	2.44532	3.76149	7.22358	2.03289	3.12216	5.0358	6.2247	8.65422	10.6415	1.38275	1.77235	2.05246	31.6387	6.15521	4.4768	3.39695	8.50682	1.73585
978	25	0	1	3	0	0	1	0	0	0	0	1	3050	0	23.8137	31.2498	39.8527	4.77048	6.58573	7.1094	2.44532	3.76149	7.22358	2.03289	3.12216	5.0358	6.2247	8.65422	10.6415	1.38275	1.77235	2.05246	31.6387	6.15521	4.4768	3.39695	8.50682	1.73585
979	32	0	1	3	0	0	1	0	0	0	0	2	3000	1	23.8137	31.2498	40.0449	4.77048	6.58573	7.05363	2.44532	3.76149	7.38702	2.03289	3.12216	5.14398	6.2247	8.65422	10.6369	1.38275	1.77235	2.03891	31.7028	6.13661	4.53128	3.43301	8.50528	1.73134
980	32	0	3	3	0	0	1	0	1	0	0	2	2950	0	23.8137	31.2498	41.1741	4.77048	6.58573	7.24348	2.44532	3.76149	7.55437	2.03289	3.12216	5.24843	6.2247	8.65422	10.9494	1.38275	1.77235	2.0983	32.0792	6.1999	4.58706	3.46783	8.60943	1.75113
981	23	0	1	3	0	0	0	0	0	0	0	1	2800	1	23.4541	31.8272	39.0026	4.69794	6.70261	6.94532	2.41483	3.87684	7.08907	2.0065	3.21924	4.92312	6.1272	8.81911	10.4047	1.3613	1.80344	2.00671	31.428	6.11529	4.46025	3.38295	8.45033	1.72382
982	23	0	3	1	0	0	1	0	0	0	0	2	2350	0	23.4541	31.8272	40.1142	4.69794	6.70261	7.0669	2.41483	3.87684	7.39338	2.0065	3.21924	5.1166	6.1272	8.81911	10.6692	1.3613	1.80344	2.04786	31.7985	6.15582	4.56169	3.44745	8.5385	1.73754
983	27	0	1	1	0	0	1	0	0	0	0	2	2550	1	23.4541	31.8272	39.3927	4.69794	6.70261	7.00978	2.41483	3.87684	7.15908	2.0065	3.21924	4.96856	6.1272	8.81911	10.51	1.3613	1.80344	2.02634	31.558	6.13678	4.48359	3.3981	8.48542	1.73036
984	27	0	3	1	0	0	0	0	0	0	0	2	3200	0	23.4541	31.8272	40.2076	4.69794	6.70261	7.14544	2.41483	3.87684	7.31874	2.0065	3.21924	5.07661	6.1272	8.81911	10.7241	1.3613	1.80344	2.06628	31.8297	6.182	4.53681	3.43412	8.5568	1.74367
985	31	0	1	3	0	0	0	0	0	0	0	2	3100	1	23.4541	31.8272	41.1714	4.69794	6.70261	7.2161	2.41483	3.87684	7.57909	2.0065	3.21924	5.23733	6.1272	8.81911	10.9373	1.3613	1.80344	2.0944	32.1509	6.20555	4.62359	3.48769	8.62786	1.75305
986	31	0	3	3	0	1	1	1	0	0	0	1	3080	0	23.4541	31.8272	40.0669	4.69794	6.70261	7.02831	2.41483	3.87684	7.42476	2.0065	3.21924	5.13592	6.1272	8.81911	10.6376	1.3613	1.80344	2.03852	31.7827	6.14296	4.57215	3.45389	8.52797	1.73442
987	34	0	3	4	0	0	1	0	0	0	0	2	3050	1	23.237	32.5755	38.0726	4.64393	6.85556	6.74436	2.38817	4.08303	6.94302	1.98602	3.38713	4.80071	6.05974	8.98925	10.2277	1.34706	1.83594	1.96968	31.295	6.08128	4.47141	3.39128	8.42557	1.71756
988	34	0	1	3	0	1	1	1	1	0	0	1	3200	0	23.237	32.5755	38.1703	4.64393	6.85556	6.76043	2.38817	4.08303	6.94995	1.98602	3.38713	4.79495	6.05974	8.98925	10.2154	1.34706	1.83594	1.96625	31.3276	6.08664	4.47372	3.38937	8.42147	1.71642
989	28	0	1	3	0	0	0	0	0	0	0	2	3100	1	23.233	32.8095	37.947	4.64098	6.90136	6.68976	2.38823	4.12747	6.95389	1.98538	3.42502	4.78706	6.05796	9.06198	10.1678	1.34548	1.84801	1.95819	31.3298	6.07737	4.48986	3.39916	8.42925	1.71723
990	28	0	3	2	0	0	0	0	0	0	0	2	2700	0	23.233	32.8095	36.6313	4.64098	6.90136	6.50898	2.38823	4.12747	6.67148	1.98538	3.42502	4.60758	6.05796	9.06198	9.8553	1.34548	1.84801	1.90116	30.8913	6.01711	4.39572	3.33933	8.32508	1.69822
991	25	0	1	3	0	0	1	0	0	0	0	2	3000	1	23.3462	33.0997	39.1197	4.66599	6.9603	6.88055	2.39887	4.16951	7.1442	1.99312	3.45696	4.90268	6.08873	9.14835	10.4486	1.35232	1.86289	2.01142	31.8552	6.16895	4.57086	3.45092	8.56189	1.74221
992	25	0	3	3	0	0	0	0	0	0	0	1	2550	0	23.3462	33.0997	36.9733	4.66599	6.9603	6.53936	2.39887	4.16951	6.77406	1.99312	3.45696	4.66938	6.08873	9.14835	9.93252	1.35232	1.86289	1.91572	31.1397	6.05522	4.44748	3.37315	8.38987	1.71031
993	32	0	1	2	0	0	1	0	0	0	0	1	2500	0	23.3462	33.0997	38.7074	4.66599	6.9603	6.81356	2.39887	4.16951	7.06978	1.99312	3.45696	4.85512	6.08873	9.14835	10.3372	1.35232	1.86289	1.9907	31.7178	6.14661	4.54605	3.43507	8.52477	1.7353
994	32	0	1	1	0	0	0	0	0	1	0	1	3200	1	23.3462	33.0997	37.1741	4.66599	6.9603	6.5661	2.39887	4.16951	6.82288	1.99312	3.45696	4.70134	6.08873	9.14835	9.97834	1.35232	1.86289	1.92388	31.2067	6.06413	4.46375	3.38381	8.40514	1.71303
995	30	0	1	3	0	0	1	0	0	0	0	2	3500	1	23.436	33.3407	35.8875	4.67906	7.01376	6.35316	2.3883	4.21913	6.61331	1.97947	3.49307	4.56016	6.11485	9.2169	9.62696	1.35692	1.8763	1.85548	30.8881	6.01533	4.40691	3.34423	8.31957	1.69623
996	30	0	3	2	0	0	0	0	1	0	0	1	3200	0	23.436	33.3407	39.6443	4.67906	7.01376	6.86219	2.3883	4.21913	7.38989	1.97947	3.49307	5.04607	6.11485	9.2169	10.5443	1.35692	1.8763	2.01761	32.1403	6.185	4.66577	3.5062	8.62534	1.75027
997	24	0	1	1	0	0	1	0	0	0	0	1	3900	1	23.4819	33.4559	37.8246	4.67931	7.03214	6.63325	2.38162	4.27067	6.95399	1.96645	3.53795	4.76439	6.12845	9.23026	10.1003	1.35818	1.87945	1.94334	31.5875	6.1149	4.53543	3.42293	8.48635	1.72699
998	24	0	1	1	0	1	0	0	0	0	0	1	2590	0	23.4819	33.4559	37.657	4.67931	7.03214	6.59853	2.38162	4.27067	6.94614	1.96645	3.53795	4.75662	6.12845	9.23026	10.0585	1.35818	1.87945	1.93432	31.5316	6.10333	4.53281	3.42034	8.47242	1.72398
999	25	0	1	3	0	0	1	0	0	0	0	2	3700	1	23.5208	33.8004	36.9087	4.68074	7.08204	6.49054	2.37765	4.33843	6.82123	1.96023	3.5949	4.66884	6.13368	9.33418	9.9055	1.358	1.90027	1.90628	31.41	6.08444	4.51244	3.40799	8.45779	1.72152
1000	25	0	1	1	0	0	1	0	0	0	0	1	3800	0	23.5208	33.8004	34.9599	4.68074	7.08204	6.21295	2.37765	4.33843	6.42241	1.96023	3.5949	4.41613	6.13368	9.33418	9.3857	1.358	1.90027	1.81838	30.7604	5.99191	4.3795	3.32375	8.28452	1.69222
1001	36	0	3	3	0	1	1	0	0	0	0	2	3750	1	23.4639	34.1269	35.5671	4.67334	7.13157	6.2736	2.34212	4.42977	6.55681	1.93434	3.65813	4.48831	6.12837	9.41493	9.55944	1.35765	1.91556	1.84038	31.0526	6.02617	4.4429	3.36026	8.36758	1.70453
1002	36	0	3	3	0	1	0	0	0	0	0	2	3700	0	23.4639	34.1269	39.0273	4.67334	7.13157	6.7098	2.34212	4.42977	7.33477	1.93434	3.65813	4.96733	6.12837	9.41493	10.3512	1.35765	1.91556	1.97072	32.206	6.17157	4.70222	3.51993	8.6315	1.74798
1003	31	0	1	3	0	0	0	0	1	0	0	2	2700	1	23.6289	34.1861	35.3222	4.71224	7.13182	6.24632	2.35665	4.45519	6.54134	1.94475	3.67445	4.48928	6.17897	9.42862	9.47903	1.36788	1.91731	1.82479	31.0457	6.03012	4.45106	3.36949	8.36221	1.70333
1004	31	0	1	3	0	0	1	0	1	0	0	1	2550	0	23.6289	34.1861	35.336	4.71224	7.13182	6.25626	2.35665	4.45519	6.53359	1.94475	3.67445	4.47713	6.17897	9.42862	9.48538	1.36788	1.91731	1.82606	31.0503	6.03344	4.44848	3.36544	8.36432	1.70375
1005	27	0	3	4	0	0	1	0	0	0	0	1	3000	1	24.0095	34.1424	37.9144	4.79744	7.10796	6.64039	2.39093	4.48744	7.00186	1.97129	3.70194	4.75561	6.28828	9.40643	10.1222	1.39057	1.90989	1.94471	32.0221	6.18193	4.62674	3.47628	8.60565	1.74839
1006	27	0	3	3	0	0	1	0	0	1	0	1	3700	0	24.0095	34.1424	35.5929	4.79744	7.10796	6.29768	2.39093	4.48744	6.59189	1.97129	3.70194	4.50627	6.28828	9.40643	9.56094	1.39057	1.90989	1.84056	31.2483	6.0677	4.49008	3.39317	8.41855	1.71368
1007	36	0	1	3	0	1	0	1	1	0	0	2	2950	1	24.0095	34.1424	37.4699	4.79744	7.10796	6.56165	2.39093	4.48744	6.95727	1.97129	3.70194	4.72907	6.28828	9.40643	10.0037	1.39057	1.90989	1.92133	31.8739	6.15569	4.61188	3.46744	8.56614	1.7406
1008	36	1	3	1	0	1	1	0	1	0	0	1	2950	0	24.0095	34.1424	35.2044	4.79744	7.10796	6.24653	2.39093	4.48744	6.49191	1.97129	3.70194	4.44629	6.28828	9.40643	9.45683	1.39057	1.90989	1.82735	31.1188	6.05065	4.45676	3.37317	8.38385	1.70927
1009	25	0	3	2	0	0	0	0	1	0	0	1	3000	1	24.274	34.0914	35.0179	4.8542	7.0808	6.23135	2.41799	4.50868	6.44292	1.99133	3.71746	4.41296	6.3667	9.38402	9.41939	1.40704	1.90279	1.82515	31.1278	6.05545	4.45653	3.37392	8.39004	1.71166
1010	25	0	1	3	0	0	0	0	0	1	0	2	3150	0	24.274	34.0914	34.2433	4.8542	7.0808	6.09093	2.41799	4.50868	6.31998	1.99133	3.71746	4.33221	6.3667	9.38402	9.21007	1.40704	1.90279	1.78367	30.8696	6.00864	4.41555	3.347	8.32026	1.69783
1011	33	0	3	3	0	1	1	1	0	0	0	2	3000	1	24.274	34.0914	36.8009	4.8542	7.0808	6.47807	2.41799	4.50868	6.81846	1.99133	3.71746	4.64327	6.3667	9.38402	9.89523	1.40704	1.90279	1.90385	31.7221	6.13769	4.58171	3.45069	8.54865	1.73789
1012	33	0	3	3	0	0	1	0	1	0	0	1	3050	0	24.274	34.0914	37.4933	4.8542	7.0808	6.57957	2.41799	4.50868	6.9657	1.99133	3.71746	4.74424	6.3667	9.38402	10.0635	1.40704	1.90279	1.93441	31.9529	6.17152	4.63079	3.48434	8.60475	1.74808
1013	26	0	1	1	0	0	1	0	0	0	0	2	3100	1	23.5448	34.6504	34.2705	4.72139	7.12385	6.13481	2.2406	4.62719	6.37844	1.86419	3.79321	4.3672	6.16486	9.5622	9.17513	1.36888	1.93542	1.77589	30.8219	5.99335	4.41541	3.34153	8.30073	1.69339
1014	26	0	1	1	0	0	0	0	0	0	0	2	2600	0	23.5448	34.6504	37.1225	4.72139	7.12385	6.56756	2.2406	4.62719	6.95829	1.86419	3.79321	4.73944	6.16486	9.5622	9.93627	1.36888	1.93542	1.909	31.7725	6.1376	4.60869	3.46561	8.55444	1.73776
1015	30	0	1	3	0	0	0	0	0	0	0	2	2000	1	23.5448	34.6504	35.9123	4.72139	7.12385	6.3686	2.2406	4.62719	6.71103	1.86419	3.79321	4.5702	6.16486	9.5622	9.62329	1.36888	1.93542	1.85026	31.3692	6.07128	4.52628	3.4092	8.45012	1.71818
1016	30	0	1	3	0	0	1	0	1	0	0	1	2900	0	23.5448	34.6504	34.6215	4.72139	7.12385	6.19524	2.2406	4.62719	6.43928	1.86419	3.79321	4.40918	6.16486	9.5622	9.27203	1.36888	1.93542	1.79504	30.9389	6.0135	4.43569	3.35552	8.33303	1.69978
1017	27	0	2	3	0	0	0	0	0	1	0	1	3300	1	23.045	35.3652	36.0963	4.61009	7.20638	6.42469	2.17933	4.85746	6.75848	1.80957	3.94709	4.59218	6.0238	9.75947	9.65295	1.33815	1.96968	1.85378	31.5022	6.08038	4.59843	3.44961	8.47874	1.72054
1018	27	0	1	3	0	0	1	0	0	0	0	1	2700	0	23.045	35.3652	35.5661	4.61009	7.20638	6.34246	2.17933	4.85746	6.63536	1.80957	3.94709	4.51129	6.0238	9.75947	9.52473	1.33815	1.96968	1.83046	31.3254	6.05298	4.55739	3.42265	8.436	1.71276
1019	25	0	1	1	0	0	0	0	0	0	0	1	3250	1	23.395	34.9176	33.8346	4.667	7.11644	6.06955	2.26889	4.83864	6.2862	1.86587	3.92619	4.30807	6.13397	9.60971	9.11116	1.35614	1.93648	1.76478	30.7157	5.951	4.46458	3.36671	8.28495	1.6858
1020	25	0	3	4	0	0	1	0	0	0	0	2	3250	0	23.395	34.9176	33.9743	4.667	7.11644	6.13585	2.26889	4.83864	6.25547	1.86587	3.92619	4.3299	6.13397	9.60971	9.26238	1.35614	1.93648	1.79807	30.7623	5.9731	4.45433	3.37399	8.33535	1.6969
1021	29	0	3	2	0	0	0	0	0	0	0	2	3350	0	23.4488	34.9635	33.8962	4.68639	7.10881	6.13858	2.28744	4.86765	6.20723	1.88163	3.94337	4.29648	6.15323	9.60992	9.2606	1.35992	1.93505	1.79923	30.7695	5.97793	4.45411	3.37383	8.34125	1.69807
1022	29	0	3	3	0	1	1	1	0	0	0	2	2700	1	23.4488	34.9635	34.0771	4.68639	7.10881	6.14256	2.28744	4.86765	6.28261	1.88163	3.94337	4.34355	6.15323	9.60992	9.28816	1.35992	1.93505	1.80488	30.8298	5.97925	4.47923	3.38952	8.35044	1.69995
1023	23	0	3	3	0	0	1	0	0	0	0	2	3100	1	23.5491	35.0725	33.9129	4.71005	7.11997	6.08499	2.29811	4.93254	6.25852	1.89249	3.97545	4.29506	6.17752	9.63749	9.14782	1.36807	1.93111	1.77837	30.8449	5.97167	4.49639	3.38767	8.32094	1.69251
1024	23	0	1	2	0	0	1	0	0	0	0	2	2300	0	23.5491	35.0725	33.7088	4.71005	7.11997	6.15422	2.29811	4.93254	6.08498	1.89249	3.97545	4.23455	6.17752	9.63749	9.2402	1.36807	1.93111	1.80471	30.7768	5.99475	4.43854	3.3675	8.35173	1.7013
1025	24	0	1	3	0	0	0	0	0	0	0	1	3150	1	23.5017	35.1846	33.9104	4.69157	7.12379	6.15385	2.27632	5.0069	6.14441	1.87541	4.01618	4.26785	6.1519	9.67576	9.27289	1.36496	1.93016	1.81334	30.8656	5.98974	4.47588	3.38648	8.36685	1.70282
1026	24	0	1	2	0	0	0	0	0	0	0	2	3300	0	23.5017	35.1846	35.0828	4.69157	7.12379	6.31486	2.27632	5.0069	6.43099	1.87541	4.01618	4.40293	6.1519	9.67576	9.43653	1.36496	1.93016	1.83481	31.2564	6.04341	4.5714	3.4315	8.4214	1.70998
1027	31	0	1	3	0	0	1	0	0	0	0	2	2700	1	23.4401	35.163	33.9145	4.66221	7.10781	6.12591	2.2699	5.04221	6.20865	1.8648	4.04051	4.26037	6.12457	9.67613	9.11973	1.35662	1.9271	1.7804	30.8392	5.96531	4.50692	3.38856	8.30681	1.68804
1028	31	0	3	2	0	0	0	0	0	0	0	1	3150	0	23.4401	35.163	34.1185	4.66221	7.10781	6.17713	2.2699	5.04221	6.20631	1.8648	4.04051	4.30711	6.12457	9.67613	9.30299	1.35662	1.9271	1.8227	30.9072	5.98238	4.50614	3.40414	8.3679	1.70214
1029	28	0	1	3	0	0	0	0	0	0	0	1	2900	1	23.4286	35.2056	33.7578	4.6558	7.09603	6.20647	2.26026	5.07991	6.03337	1.8548	4.06858	4.20118	6.12019	9.69113	9.24716	1.35504	1.92716	1.81697	30.7973	5.9861	4.45785	3.37485	8.35283	1.69973
1030	28	0	1	2	0	0	0	0	0	0	0	1	3350	0	23.4286	35.2056	36.1451	4.6558	7.09603	6.49826	2.26026	5.07991	6.60994	1.8548	4.06858	4.50181	6.12019	9.69113	9.72132	1.35504	1.92716	1.88827	31.5931	6.08337	4.65004	3.47506	8.51088	1.72349
1031	28	0	1	2	0	0	0	0	0	0	0	2	3400	1	23.3541	35.6927	35.9222	4.63327	7.14191	6.52167	2.26018	5.25149	6.52762	1.85662	4.17373	4.46369	6.0957	9.83624	9.62952	1.34553	1.94695	1.87907	31.6563	6.09895	4.67976	3.49801	8.52049	1.72385
1032	28	0	1	3	0	0	1	0	0	0	0	2	2600	0	23.3541	35.6927	34.0337	4.63327	7.14191	6.2632	2.26018	5.25149	6.05559	1.85662	4.17373	4.21065	6.0957	9.83624	9.30076	1.34553	1.94695	1.83241	31.0269	6.01279	4.52242	3.41367	8.4109	1.7083
1033	26	0	1	3	0	0	1	0	0	1	0	1	3600	1	23.4014	36.1874	32.9382	4.65267	7.17736	6.18328	2.27324	5.35692	5.74553	1.86579	4.23778	4.03214	6.13031	9.96325	9.03175	1.35601	1.966	1.78559	30.8423	6.00444	4.45856	3.37857	8.3751	1.70254
1034	26	0	1	2	0	0	0	0	0	0	0	2	3050	0	23.4014	36.1874	33.8097	4.65267	7.17736	6.20267	2.27324	5.35692	6.13081	1.86579	4.23778	4.21211	6.13031	9.96325	9.0907	1.35601	1.966	1.78503	31.1328	6.0109	4.58699	3.43856	8.39475	1.70235
1035	29	0	1	3	0	0	0	0	0	0	0	1	2400	1	23.4507	36.4671	33.277	4.66702	7.20089	6.24453	2.27953	5.41318	5.84607	1.87031	4.27767	4.08399	6.14846	10.0426	9.11577	1.3608	1.98027	1.79721	31.0649	6.03748	4.51293	3.41066	8.43562	1.71276
1036	29	0	1	3	0	0	1	0	0	0	0	2	3900	0	23.4507	36.4671	33.7924	4.66702	7.20089	6.21744	2.27953	5.41318	6.12629	1.87031	4.27767	4.22541	6.14846	10.0426	9.13434	1.3608	1.98027	1.79873	31.2367	6.02845	4.60633	3.4578	8.44181	1.71327
1037	31	0	2	1	0	0	1	0	0	0	0	1	2500	1	23.3615	36.8184	34.6598	4.65915	7.23955	6.42936	2.2594	5.48664	6.30016	1.85858	4.32785	4.3029	6.12788	10.1557	9.24613	1.35825	2.00106	1.80671	31.6132	6.10935	4.68207	3.49644	8.50989	1.72201
1038	31	0	2	2	0	0	1	0	1	0	0	1	2900	0	23.3615	36.8184	32.3086	4.65915	7.23955	6.1186	2.2594	5.48664	5.65607	1.85858	4.32785	3.9674	6.12788	10.1557	8.8252	1.35825	2.00106	1.743	30.8295	6.00577	4.46737	3.38461	8.36958	1.70077
1039	34	0	1	3	0	0	1	0	1	0	0	1	1250	1	23.4564	37.7318	31.2065	4.6785	7.35439	5.98848	2.26706	5.70712	5.40257	1.8596	4.46704	3.81197	6.16533	10.4127	8.5204	1.35999	2.05351	1.68587	30.7982	6.00712	4.45892	3.37954	8.36614	1.69979
1040	34	0	3	1	0	0	1	0	1	0	0	1	3500	0	23.4564	37.7318	32.3249	4.6785	7.35439	6.09806	2.26706	5.70712	5.79752	1.8596	4.46704	4.03979	6.16533	10.4127	8.78915	1.35999	2.05351	1.72555	31.171	6.04365	4.59057	3.45548	8.45572	1.71302
1041	28	0	1	3	0	0	1	0	0	0	0	1	3600	1	23.5817	37.9302	32.2139	4.71206	7.37888	6.05096	2.28344	5.73806	5.86431	1.87058	4.48432	4.08233	6.20935	10.4721	8.71912	1.36681	2.06442	1.71216	31.2419	6.0473	4.62861	3.47907	8.46687	1.71446
1042	28	0	3	2	0	1	1	1	0	0	0	1	3300	0	23.5817	37.9302	31.2609	4.71206	7.37888	5.98678	2.28344	5.73806	5.4817	1.87058	4.48432	3.85989	6.20935	10.4721	8.53421	1.36681	2.06442	1.68444	30.9243	6.02591	4.50107	3.40493	8.40523	1.70522
1043	29	0	1	3	0	0	1	0	0	1	0	2	3300	1	23.5817	37.9302	32.2139	4.71206	7.37888	6.05096	2.28344	5.73806	5.86431	1.87058	4.48432	4.08233	6.20935	10.4721	8.71912	1.36681	2.06442	1.71216	31.2419	6.0473	4.62861	3.47907	8.46687	1.71446
1044	29	0	1	2	0	1	0	1	0	0	0	2	3250	0	23.5817	37.9302	30.7314	4.71206	7.37888	5.91848	2.28344	5.73806	5.31399	1.87058	4.48432	3.76166	6.20935	10.4721	8.37864	1.36681	2.06442	1.66663	30.7478	6.00314	4.44516	3.37218	8.35337	1.69929
1045	30	0	1	1	0	0	1	0	0	0	0	1	3700	1	23.5817	37.9302	30.8367	4.71206	7.37888	5.93055	2.28344	5.73806	5.34785	1.87058	4.48432	3.78104	6.20935	10.4721	8.40054	1.36681	2.06442	1.66594	30.7828	6.00716	4.45645	3.37864	8.36068	1.69906
1046	30	0	1	2	0	0	0	0	0	0	0	1	3850	0	23.5817	37.9302	30.7314	4.71206	7.37888	5.91848	2.28344	5.73806	5.31399	1.87058	4.48432	3.76166	6.20935	10.4721	8.37864	1.36681	2.06442	1.66663	30.7478	6.00314	4.44516	3.37218	8.35337	1.69929
1047	30	0	1	2	0	1	1	1	0	0	0	1	2750	1	24.2264	38.7704	29.3536	4.87946	7.46721	5.70913	2.37098	6.02016	5.05704	1.92618	4.64049	3.62034	6.41591	10.6371	8.09207	1.41133	2.07433	1.62276	30.7834	6.0186	4.48272	3.39567	8.38169	1.70281
1048	30	0	1	2	0	0	1	0	0	0	0	1	3300	0	24.2264	38.7704	30.5154	4.87946	7.46721	5.85719	2.37098	6.02016	5.41318	1.92618	4.64049	3.82594	6.41591	10.6371	8.42852	1.41133	2.07433	1.67011	31.1707	6.06795	4.60144	3.4642	8.49384	1.71859
1049	30	0	1	4	0	0	0	0	0	0	0	2	2200	1	24.2264	38.7704	29.2121	4.87946	7.46721	5.72216	2.37098	6.02016	4.98861	1.92618	4.64049	3.59396	6.41591	10.6371	8.05456	1.41133	2.07433	1.6236	30.7363	6.02294	4.45991	3.38688	8.36919	1.70309
1050	30	0	1	2	0	1	1	0	0	0	0	1	3030	0	24.2264	38.7704	30.0376	4.87946	7.46721	5.8025	2.37098	6.02016	5.25354	1.92618	4.64049	3.73444	6.41591	10.6371	8.30071	1.41133	2.07433	1.65059	31.0114	6.04972	4.54823	3.4337	8.45124	1.71208
1051	31	0	1	4	0	0	0	0	0	0	0	2	3000	1	24.3386	38.7294	29.7868	4.90937	7.45533	5.77	2.38667	6.04954	5.15212	1.9335	4.66425	3.66744	6.45663	10.6118	8.23795	1.41879	2.06727	1.64285	30.9516	6.0449	4.52944	3.42173	8.43547	1.70964
1052	31	0	1	1	0	0	1	0	1	0	0	1	3700	0	24.3386	38.7294	29.339	4.90937	7.45533	5.73993	2.38667	6.04954	4.99598	1.9335	4.66425	3.58856	6.45663	10.6118	8.10431	1.41879	2.06727	1.63402	30.8023	6.03487	4.47739	3.39543	8.39092	1.70669
1053	26	0	1	3	0	0	0	0	0	0	0	2	3390	1	24.4892	38.7895	29.3075	4.94813	7.45135	5.77382	2.40347	6.09344	4.93916	1.9437	4.6953	3.58063	6.50421	10.6129	8.11949	1.42824	2.06519	1.64359	30.8621	6.05777	4.47869	3.40654	8.4122	1.71234
1054	26	0	1	3	0	1	1	1	0	0	0	1	2950	0	24.4892	38.7895	30.3041	4.94813	7.45135	5.86194	2.40347	6.09344	5.27676	1.9437	4.6953	3.7429	6.50421	10.6129	8.42191	1.42824	2.06519	1.67543	31.1943	6.08714	4.59122	3.46063	8.513	1.72295
1055	32	0	1	4	0	0	1	0	0	0	0	2	3150	1	24.4992	39.0147	29.3155	4.94981	7.48402	5.71085	2.40962	6.16151	4.9995	1.94645	4.74125	3.56885	6.51001	10.6558	8.15018	1.42732	2.07296	1.63612	30.9432	6.04822	4.52354	3.41885	8.43868	1.71213
1056	32	0	1	2	0	0	0	0	0	0	0	1	3500	0	24.4992	39.0147	29.0826	4.94981	7.48402	5.68057	2.40962	6.16151	4.96641	1.94645	4.74125	3.56342	6.51001	10.6558	8.07685	1.42732	2.07296	1.62294	30.8655	6.03813	4.51251	3.41704	8.41423	1.70774
1057	27	0	1	2	0	0	1	0	0	0	0	2	3100	0	24.4006	39.1065	28.7355	4.94333	7.48108	5.71814	2.40802	6.2126	4.69759	1.94592	4.76347	3.43167	6.49306	10.658	8.01548	1.42245	2.07115	1.63643	30.7476	6.04752	4.4394	3.38035	8.38884	1.71001
1058	27	0	1	2	0	0	1	0	0	0	0	2	3100	1	24.4006	39.1065	28.8362	4.94333	7.48108	5.67557	2.40802	6.2126	4.85515	1.94592	4.76347	3.50775	6.49306	10.658	8.04102	1.42245	2.07115	1.62379	30.7811	6.03333	4.49192	3.40571	8.39735	1.7058
1059	25	0	1	3	0	0	1	0	0	0	0	2	3450	1	24.2553	39.3038	28.6619	4.94781	7.4836	5.64274	2.42338	6.30664	4.79701	1.97385	4.79807	3.47322	6.46153	10.684	8.0376	1.41578	2.06881	1.6242	30.7403	6.02472	4.50901	3.41504	8.39437	1.70293
1060	25	0	1	3	0	0	1	0	0	0	0	2	2900	0	24.2553	39.3038	28.8651	4.94781	7.4836	5.65511	2.42338	6.30664	4.84742	1.97385	4.79807	3.48903	6.46153	10.684	8.10244	1.41578	2.06881	1.6331	30.8081	6.02884	4.52582	3.42031	8.41598	1.7059
1061	28	0	3	1	0	0	1	0	0	0	0	2	2800	1	24.2853	39.5561	28.3428	4.95058	7.51014	5.615	2.42911	6.41591	4.64642	1.97722	4.85483	3.38732	6.46122	10.7433	7.96236	1.41262	2.07479	1.62327	30.7281	6.02524	4.49715	3.40646	8.38896	1.70356
1062	28	0	3	3	0	0	0	0	1	0	0	1	3150	0	24.2853	39.5561	28.396	4.95058	7.51014	5.64999	2.42911	6.41591	4.63578	1.97722	4.85483	3.40776	6.46122	10.7433	7.9844	1.41262	2.07479	1.63028	30.7458	6.0369	4.4936	3.41327	8.3963	1.7059
1063	27	0	3	1	0	0	1	0	0	0	0	1	4050	1	24.3545	39.6885	27.7084	4.96339	7.51088	5.58415	2.44224	6.47378	4.34229	1.99084	4.87903	3.22011	6.48193	10.7702	7.78367	1.41494	2.07903	1.60963	30.5838	6.01947	4.41944	3.36332	8.34528	1.7012
1064	27	0	1	3	0	0	1	0	0	0	0	2	3450	0	24.3545	39.6885	28.1451	4.96339	7.51088	5.61608	2.44224	6.47378	4.57598	1.99084	4.87903	3.36938	6.48193	10.7702	7.91903	1.41494	2.07903	1.61709	30.7294	6.03012	4.49733	3.41308	8.3904	1.70369
1065	26	0	3	2	0	0	1	0	0	0	0	1	2950	1	24.3811	40.2919	26.7097	4.96795	7.55354	5.45661	2.45214	6.63846	4.12311	2.00024	4.97601	3.07828	6.48791	10.9296	7.50752	1.41137	2.10966	1.56081	30.4609	5.9927	4.40457	3.35151	8.30833	1.69395
1066	26	0	1	3	0	0	1	0	1	0	0	1	3150	0	24.3811	40.2919	27.4939	4.96795	7.55354	5.60605	2.45214	6.63846	4.29196	2.00024	4.97601	3.19534	6.48791	10.9296	7.74712	1.41137	2.10966	1.60258	30.7223	6.04251	4.46085	3.39053	8.3882	1.70787
1067	26	1	1	1	0	0	0	0	0	0	0	1	3000	1	24.7405	40.6262	26.7352	5.05339	7.59907	5.43858	2.51637	6.79435	4.19143	2.04398	5.05445	3.13174	6.61915	10.9712	7.60083	1.43218	2.1159	1.56581	30.7007	6.03035	4.50072	3.41006	8.39705	1.70463
1068	26	0	3	4	0	0	0	0	0	0	0	2	3450	0	24.7405	40.6262	26.9327	5.05339	7.59907	5.51132	2.51637	6.79435	4.15975	2.04398	5.05445	3.13225	6.61915	10.9712	7.6383	1.43218	2.1159	1.58284	30.7665	6.05459	4.49016	3.41022	8.40954	1.71031
1069	24	0	3	3	0	0	1	0	0	0	0	2	3300	1	24.9713	40.8856	26.4054	5.11838	7.63891	5.4131	2.5621	6.89226	3.997	2.08229	5.09779	3.04022	6.69837	11.0058	7.53344	1.44535	2.12305	1.56455	30.7541	6.0568	4.48379	3.40677	8.41254	1.71098
1070	24	0	1	2	0	0	1	0	0	0	0	1	3800	0	24.9713	40.8856	26.0863	5.11838	7.63891	5.365	2.5621	6.89226	3.88645	2.08229	5.09779	2.96253	6.69837	11.0058	7.43543	1.44535	2.12305	1.55339	30.6477	6.04076	4.44694	3.38087	8.37988	1.70726
1071	24	0	1	1	0	0	0	0	0	0	0	1	3550	1	25.6391	41.0453	25.5535	5.27186	7.64765	5.2465	2.68081	6.95683	3.86635	2.19178	5.09792	2.96778	6.90747	11.0409	7.30705	1.48193	2.13023	1.52162	30.7459	6.05534	4.50133	3.41916	8.41848	1.71126
1072	24	0	1	1	0	0	0	0	0	0	0	2	3050	0	25.6391	41.0453	25.0252	5.27186	7.64765	5.16418	2.68081	6.95683	3.68025	2.19178	5.09792	2.83575	6.90747	11.0409	7.13827	1.48193	2.13023	1.49991	30.5699	6.0279	4.43929	3.37515	8.36222	1.70402
1073	26	0	3	2	0	0	0	0	0	0	0	1	2750	1	25.6391	41.0453	25.4502	5.27186	7.64765	5.24381	2.68081	6.95683	3.75394	2.19178	5.09792	2.88974	6.90747	11.0409	7.26409	1.48193	2.13023	1.52264	30.7115	6.05444	4.46386	3.39315	8.40416	1.7116
1074	26	0	3	3	0	1	1	0	1	0	0	2	2850	0	25.6391	41.0453	25.4502	5.27186	7.64765	5.24381	2.68081	6.95683	3.75394	2.19178	5.09792	2.88974	6.90747	11.0409	7.26409	1.48193	2.13023	1.52264	30.7115	6.05444	4.46386	3.39315	8.40416	1.7116
1075	27	0	3	2	1	0	0	0	0	0	0	2	3000	1	25.8583	40.9078	25.1926	5.3244	7.61554	5.19001	2.72141	6.9216	3.73472	2.23255	5.05811	2.87499	6.98687	11.0016	7.19069	1.49217	2.12474	1.50776	30.6529	6.04331	4.45925	3.38855	8.39307	1.70823
1076	27	0	1	1	0	0	0	0	0	0	0	2	2700	0	25.8583	40.9078	25.3425	5.3244	7.61554	5.21533	2.72141	6.9216	3.76049	2.23255	5.05811	2.89389	6.98687	11.0016	7.2334	1.49217	2.12474	1.51612	30.7029	6.05176	4.46783	3.39485	8.4073	1.71101
1077	28	0	1	2	0	0	1	0	0	0	0	1	3050	1	25.8431	40.674	24.9746	5.33805	7.565	5.07954	2.74587	6.87282	3.86939	2.26174	5.01091	2.94326	6.99897	10.9323	7.16763	1.48986	2.11363	1.48487	30.4972	5.9942	4.49603	3.4053	8.36631	1.69612
1078	28	0	3	2	0	0	1	0	0	0	0	1	3550	0	25.8431	40.674	24.9996	5.33805	7.565	5.14986	2.74587	6.87282	3.72278	2.26174	5.01091	2.86699	6.99897	10.9323	7.13573	1.48986	2.11363	1.49822	30.5056	6.01764	4.44716	3.37988	8.35568	1.70057
1079	25	0	1	3	0	0	1	0	0	0	0	2	3450	1	26.1171	40.244	25.371	5.40344	7.46989	5.22051	2.80264	6.8086	3.82734	2.31287	4.95445	2.94575	7.08808	10.813	7.23571	1.50598	2.0902	1.5163	30.5774	6.03128	4.47953	3.40435	8.37891	1.70416
1080	25	0	1	1	0	0	1	0	0	0	0	1	3100	0	26.1171	40.244	24.4898	5.40344	7.46989	5.054	2.80264	6.8086	3.6544	2.31287	4.95445	2.82195	7.08808	10.813	6.95416	1.50598	2.0902	1.46467	30.2836	5.97577	4.42188	3.36309	8.28506	1.68695
1081	31	0	3	4	0	1	1	0	0	0	0	1	3300	0	26.1171	40.244	25.1026	5.40344	7.46989	5.17182	2.80264	6.8086	3.74933	2.31287	4.95445	2.88897	7.08808	10.813	7.14765	1.50598	2.0902	1.50114	30.4879	6.01505	4.45352	3.38543	8.34956	1.69911
1082	31	0	3	1	0	0	0	0	0	0	0	2	2200	1	26.1171	40.244	25.0239	5.40344	7.46989	5.16098	2.80264	6.8086	3.73166	2.31287	4.95445	2.87703	7.08808	10.813	7.1269	1.50598	2.0902	1.49831	30.4617	6.01143	4.44763	3.38145	8.34264	1.69816
1083	24	0	3	1	0	0	1	0	0	0	0	2	3200	1	26.921	39.7019	24.5449	5.58844	7.3449	5.06075	2.93521	6.75019	3.69343	2.40919	4.90258	2.85683	7.34057	10.6701	6.96756	1.54676	2.06846	1.47014	30.3892	5.99803	4.45961	3.38953	8.32607	1.69512
1084	24	0	1	3	0	1	1	1	0	0	0	2	4050	0	26.921	39.7019	25.1052	5.58844	7.3449	5.16642	2.93521	6.75019	3.82871	2.40919	4.90258	2.95619	7.34057	10.6701	7.14303	1.54676	2.06846	1.50041	30.576	6.03325	4.5047	3.42265	8.38456	1.70521
1085	23	0	3	2	0	0	0	0	0	0	0	2	2500	1	27.0417	39.6629	25.0605	5.62033	7.3263	5.16991	2.95284	6.76647	3.79163	2.42159	4.91122	2.93209	7.37799	10.665	7.12142	1.55322	2.06829	1.49764	30.5884	6.03885	4.50365	3.42164	8.38813	1.70638
1086	23	0	3	2	0	0	1	0	0	0	0	2	3150	0	27.0417	39.6629	24.1933	5.62033	7.3263	5.00543	2.95284	6.76647	3.63472	2.42159	4.91122	2.81935	7.37799	10.665	6.85037	1.55322	2.06829	1.44666	30.2993	5.98402	4.45134	3.38405	8.29779	1.68939
1087	31	0	2	2	0	0	1	0	1	0	0	1	3200	1	27.0417	39.6629	24.0401	5.62033	7.3263	4.97412	2.95284	6.76647	3.6928	2.42159	4.91122	2.83863	7.37799	10.665	6.69758	1.55322	2.06829	1.4058	30.2483	5.97358	4.4707	3.39048	8.24685	1.67577
1088	31	0	2	3	0	0	1	0	0	0	0	2	3100	0	27.0417	39.6629	23.433	5.62033	7.3263	4.84605	2.95284	6.76647	3.52388	2.42159	4.91122	2.73086	7.37799	10.665	6.61733	1.55322	2.06829	1.39757	30.0459	5.93089	4.4144	3.35456	8.2201	1.67303
1089	32	0	1	2	0	0	1	0	0	1	0	2	3700	1	27.6035	39.4835	24.0333	5.75873	7.25955	4.98262	3.03993	6.78124	3.58064	2.49348	4.91142	2.77759	7.5487	10.6136	6.80518	1.58649	2.05759	1.43826	30.3735	6.0003	4.46727	3.39416	8.3225	1.69412
1090	32	0	1	3	0	1	0	0	0	0	0	1	3320	0	27.6035	39.4835	23.9312	5.75873	7.25955	4.96258	3.03993	6.78124	3.55731	2.49348	4.91142	2.76129	7.5487	10.6136	6.7744	1.58649	2.05759	1.43178	30.3394	5.99362	4.45949	3.38873	8.31224	1.69195
1091	34	0	1	2	0	0	1	0	1	0	0	1	3350	1	27.6035	39.4835	23.3723	5.75873	7.25955	4.8411	3.03993	6.78124	3.53695	2.49348	4.91142	2.73066	7.5487	10.6136	6.55189	1.58649	2.05759	1.38022	30.1531	5.95313	4.4527	3.37852	8.23807	1.67477
1092	34	0	1	3	0	0	1	0	1	0	0	1	3200	0	27.6035	39.4835	24.8595	5.75873	7.25955	5.12441	3.03993	6.78124	3.82305	2.49348	4.91142	2.95308	7.5487	10.6136	7.07537	1.58649	2.05759	1.47883	30.6488	6.04757	4.54807	3.45266	8.41256	1.70764
1093	26	0	1	2	0	0	1	0	0	0	0	2	1900	1	28.0179	39.236	24.0961	5.84594	7.20258	4.99788	3.10431	6.75193	3.57731	2.53583	4.88712	2.78368	7.66112	10.5567	6.83175	1.60979	2.04318	1.44519	30.45	6.01547	4.47785	3.40221	8.34986	1.69939
1094	26	0	3	1	0	0	1	0	1	0	0	2	2950	0	28.0179	39.236	23.288	5.84594	7.20258	4.82667	3.10431	6.75193	3.52177	2.53583	4.88712	2.72618	7.66112	10.5567	6.52649	1.60979	2.04318	1.37593	30.1806	5.9584	4.45933	3.38304	8.2481	1.6763
1095	30	0	2	2	0	0	0	0	0	0	0	2	2850	1	28.8575	38.4091	23.7892	6.04287	7.0033	4.95259	3.22105	6.71767	3.57014	2.6281	4.85139	2.75692	7.92258	10.2911	6.65497	1.66243	1.98475	1.40336	30.3519	5.99959	4.50295	3.41214	8.28955	1.68352
1096	30	0	1	3	0	0	1	0	0	0	0	1	3500	0	28.8575	38.4091	23.9448	6.04287	7.0033	4.98196	3.22105	6.71767	3.5854	2.6281	4.85139	2.7655	7.92258	10.2911	6.70691	1.66243	1.98475	1.41456	30.4038	6.00938	4.50804	3.41499	8.30686	1.68725
1097	29	0	3	1	0	0	1	0	0	1	0	1	3200	1	28.9809	38.3787	23.6135	6.07423	6.97872	4.92442	3.24345	6.73067	3.43881	2.6517	4.8524	2.68328	7.96327	10.2751	6.7003	1.66947	1.98027	1.42174	30.3244	5.99245	4.47098	3.39579	8.31289	1.69049
1098	29	0	1	3	0	0	0	0	0	0	0	2	2900	0	28.9809	38.3787	25.1024	6.07423	6.97872	5.22482	3.24345	6.73067	3.67185	2.6517	4.8524	2.85969	7.96327	10.2751	7.17334	1.66947	1.98027	1.51563	30.8206	6.09259	4.54866	3.4546	8.47057	1.72179
1099	30	0	3	4	0	0	0	0	0	0	0	1	3800	1	29.1213	38.9919	23.5814	6.11724	7.09898	4.90152	3.26061	6.82829	3.55346	2.67078	4.90213	2.7584	8.03268	10.4572	6.55789	1.68391	2.0106	1.38046	30.5649	6.03925	4.54745	3.44377	8.34925	1.69166
1100	30	0	1	3	0	0	0	0	0	0	0	1	2750	0	29.1213	38.9919	22.8752	6.11724	7.09898	4.75267	3.26061	6.82829	3.45393	2.67078	4.90213	2.6835	8.03268	10.4572	6.38618	1.68391	2.0106	1.34883	30.3294	5.98963	4.51428	3.41881	8.29201	1.68111
1101	33	0	3	1	0	0	1	0	0	0	0	2	3450	1	29.2163	39.1093	23.3973	6.13542	7.12981	4.85733	3.28257	6.83015	3.45989	2.69209	4.89989	2.69508	8.05884	10.4965	6.48008	1.68529	2.02094	1.36681	30.5743	6.04085	4.5242	3.42902	8.34515	1.69101
1102	33	0	1	3	0	0	1	0	1	1	0	2	3000	0	29.2163	39.1093	23.3431	6.13542	7.12981	4.84865	3.28257	6.83015	3.44329	2.69209	4.89989	2.68097	8.05884	10.4965	6.46781	1.68529	2.02094	1.36584	30.5563	6.03796	4.51867	3.42431	8.34105	1.69069
1103	34	0	3	3	0	0	0	0	0	0	0	2	3450	1	29.2163	39.1093	22.1781	6.13542	7.12981	4.61172	3.28257	6.83015	3.29038	2.69209	4.89989	2.58528	8.05884	10.4965	6.25359	1.68529	2.02094	1.32708	30.1679	5.95898	4.4677	3.39242	8.26965	1.67777
1104	34	0	3	1	0	1	0	1	0	0	0	1	2000	0	29.2163	39.1093	23.5702	6.13542	7.12981	4.89419	3.28257	6.83015	3.52936	2.69209	4.89989	2.7382	8.05884	10.4965	6.54807	1.68529	2.02094	1.37794	30.6319	6.05314	4.54736	3.44339	8.36781	1.69472
1105	26	0	1	3	0	0	1	0	0	0	0	1	2850	1	29.2216	39.0303	23.8004	6.13596	7.11265	4.94234	3.28988	6.81517	3.54899	2.70014	4.88463	2.75474	8.06087	10.4752	6.61116	1.68226	2.01791	1.39157	30.6841	6.06365	4.55135	3.4465	8.38242	1.69724
1106	26	0	3	3	0	0	0	0	0	0	0	2	3150	0	29.2216	39.0303	22.354	6.13596	7.11265	4.64594	3.28988	6.81517	3.32353	2.70014	4.88463	2.61179	8.06087	10.4752	6.30175	1.68226	2.01791	1.3369	30.202	5.96485	4.47619	3.39885	8.27928	1.67902
1107	27	0	3	1	0	1	0	1	0	0	0	2	2800	1	29.3112	38.8278	23.644	6.15407	7.07033	4.89649	3.3079	6.79086	3.61348	2.71483	4.86483	2.80317	8.08645	10.4168	6.56535	1.6837	2.00749	1.38117	30.5943	6.0403	4.57075	3.46094	8.35619	1.69078
1108	27	0	1	1	0	0	1	0	0	0	0	1	3900	0	29.3112	38.8278	24.0136	6.15407	7.07033	4.98541	3.3079	6.79086	3.5794	2.71483	4.86483	2.7773	8.08645	10.4168	6.67108	1.6837	2.00749	1.40424	30.7175	6.06994	4.55939	3.45232	8.39144	1.69848
1109	26	0	1	3	0	0	1	0	0	0	0	1	3350	1	29.4577	38.288	24.2433	6.18195	6.9564	5.02874	3.34122	6.73986	3.56478	2.74281	4.82916	2.76583	8.12804	10.2563	6.73279	1.68588	1.97897	1.41957	30.663	6.0557	4.54862	3.44593	8.37237	1.69481
1110	26	0	3	2	0	0	1	0	1	0	0	2	2500	0	29.4577	38.288	24.0514	6.18195	6.9564	4.99055	3.34122	6.73986	3.53984	2.74281	4.82916	2.75257	8.12804	10.2563	6.67082	1.68588	1.97897	1.40834	30.599	6.04297	4.54031	3.44151	8.35171	1.69106
1111	26	0	1	3	0	0	1	0	0	0	0	2	3100	1	29.5442	37.8828	23.7672	6.23121	6.85026	4.95601	3.36169	6.73269	3.52106	2.77575	4.80694	2.74184	8.14904	10.1322	6.65223	1.68732	1.95607	1.40731	30.3981	6.01249	4.53848	3.44151	8.31116	1.68357
1112	26	0	3	1	0	0	1	0	0	0	0	2	3350	0	29.5442	37.8828	23.5695	6.23121	6.85026	4.91959	3.36169	6.73269	3.5134	2.77575	4.80694	2.73943	8.14904	10.1322	6.57642	1.68732	1.95607	1.39012	30.3322	6.00035	4.53593	3.44071	8.2859	1.67784
1113	30	0	1	3	0	0	0	0	0	0	0	1	2650	1	29.5442	37.8828	24.5019	6.23121	6.85026	5.11544	3.36169	6.73269	3.5268	2.77575	4.80694	2.75658	8.14904	10.1322	6.81085	1.68732	1.95607	1.43404	30.643	6.06563	4.54039	3.44642	8.36404	1.69248
1114	30	0	3	3	0	0	1	0	1	0	0	2	3200	0	29.5442	37.8828	24.4673	6.23121	6.85026	5.0934	3.36169	6.73269	3.56454	2.77575	4.80694	2.77212	8.14904	10.1322	6.8119	1.68732	1.95607	1.43637	30.6314	6.05829	4.55297	3.4516	8.36439	1.69325
1115	35	0	1	3	0	1	0	1	0	0	0	2	1900	1	29.6954	37.7159	24.4216	6.2701	6.79628	5.10222	3.40264	6.72908	3.5304	2.8142	4.79166	2.75415	8.19934	10.0842	6.79352	1.69647	1.94637	1.43573	30.611	6.0562	4.55404	3.45334	8.35904	1.69286
1116	35	0	1	3	0	0	0	0	0	0	0	2	2900	0	29.6954	37.7159	24.104	6.2701	6.79628	5.03324	3.40264	6.72908	3.48056	2.8142	4.79166	2.72522	8.19934	10.0842	6.68195	1.69647	1.94637	1.41514	30.5051	6.03321	4.53743	3.44369	8.32185	1.68599
1117	26	0	3	1	0	0	0	0	0	0	0	2	3450	1	29.767	37.7674	23.319	6.29961	6.77892	4.91532	3.42854	6.75889	3.42027	2.84225	4.8004	2.68429	8.21853	10.1088	6.48907	1.70265	1.95005	1.37663	30.2845	5.99795	4.5359	3.44231	8.27213	1.67644
1118	26	0	3	1	0	0	1	0	0	0	0	1	3650	0	29.767	37.7674	24.2357	6.29961	6.77892	5.08727	3.42854	6.75889	3.46168	2.84225	4.8004	2.70807	8.21853	10.1088	6.72602	1.70265	1.95005	1.42321	30.59	6.05527	4.5497	3.45024	8.35111	1.69197
1119	27	0	3	3	0	0	1	0	0	0	0	1	3550	1	29.767	37.7674	23.9499	6.29961	6.77892	5.02461	3.42854	6.75889	3.43347	2.84225	4.8004	2.69528	8.21853	10.1088	6.62864	1.70265	1.95005	1.40504	30.4948	6.03438	4.5403	3.44598	8.31866	1.68591
1120	27	0	1	4	0	0	0	0	0	0	0	2	3000	0	29.767	37.7674	22.7336	6.29961	6.77892	4.79485	3.42854	6.75889	3.2362	2.84225	4.8004	2.57222	8.21853	10.1088	6.41522	1.70265	1.95005	1.37091	30.0893	5.95779	4.47454	3.40496	8.24751	1.67454
1121	28	0	1	2	0	0	1	0	0	0	0	1	3450	1	29.9113	37.846	24.003	6.33899	6.79193	5.03388	3.51436	6.77131	3.42517	2.91927	4.78359	2.69815	8.2639	10.1642	6.62299	1.70616	1.96059	1.40697	30.5868	6.05493	4.57028	3.467	8.35035	1.69124
1122	28	0	3	4	0	0	0	0	0	0	0	1	2850	0	29.9113	37.846	24.4258	6.33899	6.79193	5.14178	3.51436	6.77131	3.45364	2.91927	4.78359	2.72236	8.2639	10.1642	6.75522	1.70616	1.96059	1.43006	30.7277	6.0909	4.57977	3.47507	8.39443	1.69894
1123	25	0	1	3	0	0	0	0	0	0	0	1	2800	1	30.2522	37.4027	24.3858	6.39757	6.71784	5.12628	3.56353	6.7348	3.46198	2.95127	4.75535	2.72172	8.35831	10.0567	6.737	1.72007	1.94286	1.43165	30.6802	6.08056	4.58677	3.47612	8.384	1.69819
1124	25	0	1	1	0	0	1	0	0	0	0	1	3450	0	30.2522	37.4027	24.4606	6.39757	6.71784	5.15282	3.56353	6.7348	3.45221	2.95127	4.75535	2.72522	8.35831	10.0567	6.7573	1.72007	1.94286	1.43174	30.7052	6.08941	4.58351	3.47728	8.39076	1.69822
1125	26	0	1	2	0	0	0	0	0	0	0	1	3550	0	31.2498	36.6123	24.0961	6.58573	6.57419	5.08942	3.76149	6.69664	3.30836	3.12216	4.68496	2.62789	8.65422	9.81369	6.67518	1.77235	1.89451	1.43153	30.6527	6.08311	4.58883	3.47834	8.38103	1.69946
1126	26	0	1	1	0	0	1	0	0	1	0	2	3300	1	31.2498	36.6123	24.1985	6.58573	6.57419	5.11397	3.76149	6.69664	3.2709	3.12216	4.68496	2.60354	8.65422	9.81369	6.71223	1.77235	1.89451	1.42778	30.6869	6.0913	4.57634	3.47022	8.39338	1.69821
1127	27	0	1	2	0	0	0	0	0	0	0	2	2600	1	31.2498	36.6123	23.8276	6.58573	6.57419	5.0328	3.76149	6.69664	3.19837	3.12216	4.68496	2.54678	8.65422	9.81369	6.5987	1.77235	1.89451	1.40626	30.5632	6.06424	4.55217	3.4513	8.35554	1.69104
1128	27	0	1	3	0	0	0	0	0	1	0	2	3550	0	31.2498	36.6123	24.0901	6.58573	6.57419	5.08901	3.76149	6.69664	3.2475	3.12216	4.68496	2.58542	8.65422	9.81369	6.67827	1.77235	1.89451	1.42101	30.6507	6.08297	4.56854	3.46418	8.38206	1.69596
1129	31	0	1	4	0	1	1	1	1	0	0	1	2650	1	31.2498	36.6123	24.2135	6.58573	6.57419	5.10316	3.76149	6.69664	3.35203	3.12216	4.68496	2.66794	8.65422	9.81369	6.70371	1.77235	1.89451	1.43403	30.6919	6.08769	4.60339	3.49169	8.39054	1.7003
1130	31	0	3	3	0	0	0	0	0	1	0	2	2750	0	31.2498	36.6123	23.5847	6.58573	6.57419	4.97417	3.76149	6.69664	3.13924	3.12216	4.68496	2.50491	8.65422	9.81369	6.52959	1.77235	1.89451	1.39023	30.4823	6.04469	4.53246	3.43734	8.3325	1.6857
1131	23	0	3	1	0	0	0	0	0	0	0	1	3750	1	31.8272	36.3433	23.9938	6.70261	6.52525	5.07178	3.87684	6.62397	3.25036	3.21924	4.6192	2.58953	8.81911	9.74451	6.64682	1.80344	1.88364	1.41424	30.7215	6.09988	4.58373	3.47599	8.40348	1.70044
1132	23	0	1	4	0	0	1	0	0	0	0	1	3150	0	31.8272	36.3433	24.2173	6.70261	6.52525	5.11646	3.87684	6.62397	3.37378	3.21924	4.6192	2.69074	8.81911	9.74451	6.70119	1.80344	1.88364	1.4335	30.796	6.11478	4.62487	3.50973	8.4216	1.70686
1133	21	0	2	1	0	1	1	0	1	0	0	1	2400	1	32.5755	35.4586	23.93	6.85556	6.35535	5.03526	4.08303	6.42403	3.19998	3.38713	4.45872	2.54631	8.98925	9.5403	6.61912	1.83594	1.84962	1.40182	30.6547	6.08206	4.56901	3.46405	8.38289	1.69579
1134	21	0	2	2	0	0	0	0	0	0	0	2	2350	0	32.5755	35.4586	24.3381	6.85556	6.35535	5.13653	4.08303	6.42403	3.29027	3.38713	4.45872	2.61602	8.98925	9.5403	6.74338	1.83594	1.84962	1.428	30.7907	6.11581	4.59911	3.48729	8.42431	1.70452
1135	26	0	1	1	0	0	0	0	0	0	0	1	3100	1	32.8095	35.1328	25.2757	6.90136	6.28598	5.34648	4.12747	6.39202	3.472	3.42502	4.42878	2.76434	9.06198	9.44077	7.01681	1.84801	1.83072	1.48772	31.0727	6.17794	4.66383	3.53938	8.50652	1.72215
1136	26	0	3	3	0	0	0	0	0	0	0	2	2900	0	32.8095	35.1328	24.7415	6.90136	6.28598	5.2285	4.12747	6.39202	3.34216	3.42502	4.42878	2.66087	9.06198	9.44077	6.86597	1.84801	1.83072	1.45377	30.8946	6.13861	4.62055	3.50489	8.45624	1.71083
1137	29	0	3	3	0	0	0	0	0	0	0	2	3300	1	32.8095	35.1328	24.323	6.90136	6.28598	5.13707	4.12747	6.39202	3.26162	3.42502	4.42878	2.59778	9.06198	9.44077	6.73834	1.84801	1.83072	1.42969	30.7551	6.10814	4.5937	3.48386	8.4137	1.70281
1138	29	0	3	1	0	0	0	0	1	0	0	2	2800	0	32.8095	35.1328	24.0397	6.90136	6.28598	5.06939	4.12747	6.39202	3.19534	3.42502	4.42878	2.55056	9.06198	9.44077	6.65778	1.84801	1.83072	1.41142	30.6606	6.08558	4.57161	3.46812	8.38684	1.69672
1139	33	0	3	2	0	0	0	0	0	0	0	1	2900	1	32.8095	35.1328	24.0555	6.90136	6.28598	5.06682	4.12747	6.39202	3.19853	3.42502	4.42878	2.54845	9.06198	9.44077	6.65772	1.84801	1.83072	1.41144	30.6659	6.08472	4.57267	3.46742	8.38682	1.69672
1140	33	0	3	3	0	0	0	0	1	0	0	1	2900	0	32.8095	35.1328	24.475	6.90136	6.28598	5.17094	4.12747	6.39202	3.28987	3.42502	4.42878	2.61914	9.06198	9.44077	6.78547	1.84801	1.83072	1.43843	30.8057	6.11943	4.60312	3.49098	8.42941	1.70572
1141	30	0	1	4	0	0	1	0	0	1	0	2	2900	1	33.0997	34.7758	24.4125	6.9603	6.19889	5.1686	4.16951	6.36451	3.25648	3.45696	4.40797	2.59572	9.14835	9.33809	6.75998	1.86289	1.81085	1.4353	30.7627	6.10926	4.59683	3.48688	8.41547	1.70301
1142	30	0	3	2	0	0	0	0	0	1	0	1	3450	0	33.0997	34.7758	24.5676	6.9603	6.19889	5.2033	4.16951	6.36451	3.28502	3.45696	4.40797	2.61732	9.14835	9.33809	6.80798	1.86289	1.81085	1.44422	30.8144	6.12083	4.60634	3.49408	8.43147	1.70599
1143	27	0	1	3	0	0	0	0	0	0	0	2	3450	1	33.3407	34.5371	24.0177	7.01376	6.12719	5.10024	4.21913	6.34524	3.15814	3.49307	4.39358	2.52519	9.2169	9.28681	6.63037	1.8763	1.80104	1.40718	30.6318	6.08039	4.57417	3.47061	8.37803	1.69484
1144	27	0	3	3	0	0	1	0	1	0	0	2	2750	0	33.3407	34.5371	24.9341	7.01376	6.12719	5.3073	4.21913	6.34524	3.41722	3.49307	4.39358	2.72924	9.2169	9.28681	6.88211	1.8763	1.80104	1.46718	30.9373	6.14942	4.66053	3.53863	8.46194	1.71484
1145	29	0	3	3	0	0	1	0	0	0	0	2	2700	1	34.1269	34.0489	23.293	7.13157	6.05133	4.98269	4.42977	6.24873	2.98381	3.65813	4.32745	2.38584	9.41493	9.22985	6.36397	1.91556	1.79361	1.35724	30.4896	6.0552	4.5541	3.45714	8.33625	1.6888
1146	29	0	1	3	0	1	1	1	1	0	0	2	3650	0	34.1269	34.0489	24.0336	7.13157	6.05133	5.15532	4.42977	6.24873	3.14896	3.65813	4.32745	2.50655	9.41493	9.22985	6.56639	1.91556	1.79361	1.39555	30.7365	6.11274	4.60915	3.49738	8.40372	1.70157
1147	26	0	3	3	0	0	0	0	0	0	0	1	3050	1	34.1424	34.1859	23.2211	7.10796	6.11619	4.95102	4.48744	6.23943	3.00088	3.70194	4.32564	2.38922	9.40643	9.31428	6.28412	1.90989	1.80979	1.34379	30.5165	6.05839	4.57591	3.47227	8.33495	1.68782
1148	26	0	1	2	0	0	0	0	0	0	0	2	4050	0	34.1424	34.1859	23.2145	7.10796	6.11619	4.95536	4.48744	6.23943	2.99993	3.70194	4.32564	2.39361	9.40643	9.31428	6.28903	1.90989	1.80979	1.34465	30.5143	6.05984	4.5756	3.47373	8.33658	1.68811
1149	28	0	1	4	0	0	0	0	1	0	0	2	2550	1	34.1424	34.1859	24.4504	7.10796	6.11619	5.2455	4.48744	6.23943	3.27456	3.70194	4.32564	2.60473	9.40643	9.31428	6.62418	1.90989	1.80979	1.418	30.9262	6.15655	4.66714	3.54411	8.4483	1.71256
1150	28	0	3	2	0	0	0	0	0	0	0	2	2700	0	34.1424	34.1859	22.9298	7.10796	6.11619	4.8909	4.48744	6.23943	2.91664	3.70194	4.32564	2.32962	9.40643	9.31428	6.22295	1.90989	1.80979	1.33322	30.4194	6.03835	4.54783	3.4524	8.31456	1.6843
1151	27	0	1	4	0	1	0	1	0	0	0	2	2200	1	34.0914	34.1592	22.8811	7.0808	6.13401	4.87498	4.50868	6.21277	2.91425	3.71746	4.30613	2.32908	9.38402	9.32343	6.20011	1.90279	1.81267	1.32933	30.3773	6.02993	4.54523	3.45089	8.30252	1.6816
1152	27	0	3	1	0	0	1	0	0	0	0	2	3650	0	34.0914	34.1592	23.1499	7.0808	6.13401	4.9459	4.50868	6.21277	2.98377	3.71746	4.30613	2.38618	9.38402	9.32343	6.27146	1.90279	1.81267	1.34619	30.4668	6.05357	4.56841	3.46992	8.3263	1.68722
1153	29	0	1	3	0	0	0	0	0	0	0	1	3350	1	34.0914	34.1592	23.0046	7.0808	6.13401	4.90477	4.50868	6.21277	2.94868	3.71746	4.30613	2.35875	9.38402	9.32343	6.22961	1.90279	1.81267	1.33639	30.4184	6.03986	4.55671	3.46078	8.31235	1.68395
1154	29	0	1	3	0	0	0	0	1	1	0	1	2950	0	34.0914	34.1592	23.1499	7.0808	6.13401	4.9459	4.50868	6.21277	2.98377	3.71746	4.30613	2.38618	9.38402	9.32343	6.27146	1.90279	1.81267	1.34619	30.4668	6.05357	4.56841	3.46992	8.3263	1.68722
1155	28	0	3	1	0	0	0	0	0	0	0	1	2400	1	35.0417	33.2541	22.6366	7.1661	6.07176	4.81527	4.7257	6.01168	2.90539	3.85203	4.19135	2.3166	9.67361	9.06886	6.10845	1.95425	1.76725	1.3153	30.3108	6.01771	4.54759	3.45333	8.28364	1.67893
1156	28	0	3	1	0	1	1	1	0	1	0	1	2550	0	35.0417	33.2541	23.1194	7.1661	6.07176	4.92432	4.7257	6.01168	3.04785	3.85203	4.19135	2.42177	9.67361	9.06886	6.2064	1.95425	1.76725	1.3342	30.4718	6.05406	4.59508	3.48838	8.31629	1.68524
1157	27	0	1	3	0	0	0	0	0	0	0	2	3000	1	35.3339	32.9663	23.4282	7.20574	6.04544	4.98577	4.81461	5.92986	3.10307	3.91561	4.14063	2.45519	9.75693	8.99477	6.29056	1.97007	1.75401	1.35045	30.5761	6.07898	4.61585	3.50381	8.34742	1.69151
1158	27	0	1	3	0	0	0	0	0	0	0	2	3600	0	35.3339	32.9663	22.8224	7.20574	6.04544	4.8452	4.81461	5.92986	2.94978	3.91561	4.14063	2.34782	9.75693	8.99477	6.14125	1.97007	1.75401	1.32101	30.3742	6.03213	4.56475	3.46802	8.29765	1.6817
1159	29	0	1	3	0	1	0	1	0	0	0	1	3200	1	35.3883	32.9527	22.293	7.21376	6.05334	4.73838	4.83518	5.9191	2.83442	3.92976	4.13456	2.2532	9.77145	8.996	6.01733	1.97303	1.75544	1.29438	30.2113	6.00183	4.52957	3.43918	8.26159	1.67428
1160	29	0	3	1	0	0	0	0	0	0	0	2	3400	0	35.3883	32.9527	22.4504	7.21376	6.05334	4.76485	4.83518	5.9191	2.87924	3.92976	4.13456	2.28806	9.77145	8.996	6.04927	1.97303	1.75544	1.3026	30.2638	6.01065	4.54451	3.4508	8.27224	1.67702
1161	30	0	1	3	0	0	1	0	0	0	0	1	3400	1	35.3652	32.7242	22.8016	7.20638	6.0128	4.83498	4.85746	5.87509	2.93458	3.94709	4.10138	2.33283	9.75947	8.93389	6.13971	1.96968	1.74419	1.31875	30.297	6.01806	4.55571	3.46043	8.27769	1.67754
1162	30	0	1	3	0	1	0	1	0	0	0	1	3100	0	35.3652	32.7242	23.0909	7.20638	6.0128	4.91001	4.85746	5.87509	3.01227	3.94709	4.10138	2.39575	9.75947	8.93389	6.21379	1.96968	1.74419	1.33651	30.3934	6.04307	4.58161	3.48141	8.30239	1.68346
1163	30	0	3	3	0	0	1	0	0	0	0	2	2950	1	34.9176	32.7365	22.8553	7.11644	6.03331	4.84179	4.83864	5.82562	2.94726	3.92619	4.0769	2.34224	9.60971	8.96098	6.15628	1.93648	1.75361	1.32197	30.1698	5.99718	4.53717	3.44845	8.24232	1.67068
1164	30	0	3	1	0	0	1	0	1	0	0	1	2850	0	34.9176	32.7365	22.7342	7.11644	6.03331	4.82647	4.83864	5.82562	2.92301	3.92619	4.0769	2.32229	9.60971	8.96098	6.13543	1.93648	1.75361	1.31986	30.1294	5.99207	4.52909	3.4418	8.23537	1.66998
1165	28	0	1	1	0	0	0	0	0	0	0	2	2550	1	35.0725	32.5476	22.441	7.11997	6.02074	4.76641	4.93254	5.721	2.86783	3.97545	4.01971	2.27326	9.63749	8.92228	6.06882	1.93111	1.75957	1.29749	30.0204	5.96904	4.50712	3.42281	8.20953	1.66272
1166	28	0	3	4	0	0	1	0	0	0	0	2	3450	0	35.0725	32.5476	22.441	7.11997	6.02074	4.76641	4.93254	5.721	2.86783	3.97545	4.01971	2.27326	9.63749	8.92228	6.06882	1.93111	1.75957	1.29749	30.0204	5.96904	4.50712	3.42281	8.20953	1.66272
1167	28	0	3	2	0	0	1	0	0	0	0	1	3350	1	35.2056	32.2822	22.2254	7.09603	6.04106	4.71751	5.07991	5.59875	2.80011	4.06858	3.95552	2.21446	9.69113	8.84255	6.01042	1.92716	1.75796	1.28686	29.9044	5.95153	4.49292	3.41285	8.18137	1.65733
1168	28	0	3	3	0	0	0	0	0	0	0	1	2700	0	35.2056	32.2822	22.2254	7.09603	6.04106	4.71751	5.07991	5.59875	2.80011	4.06858	3.95552	2.21446	9.69113	8.84255	6.01042	1.92716	1.75796	1.28686	29.9044	5.95153	4.49292	3.41285	8.18137	1.65733
1169	33	0	3	1	0	0	0	0	1	0	0	1	3000	1	35.6927	32.1403	21.6907	7.14191	6.07966	4.58969	5.25149	5.49731	2.69363	4.17373	3.90704	2.12945	9.83624	8.80165	5.84065	1.94695	1.76143	1.25252	29.8412	5.93709	4.48081	3.40341	8.15951	1.65364
1170	33	0	3	2	0	0	1	0	0	1	0	1	3000	0	35.6927	32.1403	21.6907	7.14191	6.07966	4.58969	5.25149	5.49731	2.69363	4.17373	3.90704	2.12945	9.83624	8.80165	5.84065	1.94695	1.76143	1.25252	29.8412	5.93709	4.48081	3.40341	8.15951	1.65364
1171	29	0	3	3	0	0	1	0	0	0	0	1	3650	1	36.4671	31.7622	20.5284	7.20089	6.09788	4.33381	5.41318	5.4037	2.50701	4.27767	3.86129	1.98461	10.0426	8.69919	5.4888	1.98027	1.74494	1.18367	29.5859	5.87753	4.4413	3.37452	8.07688	1.6363
1172	29	0	1	3	0	1	0	0	0	0	0	2	3340	0	36.4671	31.7622	20.8657	7.20089	6.09788	4.40751	5.41318	5.4037	2.56345	4.27767	3.86129	2.02426	10.0426	8.69919	5.58795	1.98027	1.74494	1.20132	29.6983	5.90209	4.46011	3.38774	8.10992	1.64218
1173	34	0	1	1	0	1	0	1	0	1	0	1	3880	1	36.4671	31.7622	20.7591	7.20089	6.09788	4.38448	5.41318	5.4037	2.54533	4.27767	3.86129	2.01227	10.0426	8.69919	5.55553	1.98027	1.74494	1.19597	29.6628	5.89441	4.45407	3.38374	8.09912	1.6404
1174	34	0	1	1	0	0	1	0	0	1	0	2	3100	0	36.4671	31.7622	21.2849	7.20089	6.09788	4.50061	5.41318	5.4037	2.62831	4.27767	3.86129	2.06933	10.0426	8.69919	5.71782	1.98027	1.74494	1.22546	29.8381	5.93313	4.48173	3.40276	8.15322	1.65023
1175	25	0	1	3	0	0	0	0	0	0	0	2	3100	1	37.7318	30.4889	20.4214	7.35439	5.95413	4.30733	5.70712	5.1399	2.49363	4.46704	3.69213	1.97793	10.4127	8.33264	5.4558	2.05351	1.67627	1.17324	29.5474	5.87195	4.44688	3.37904	8.06705	1.63434
1176	25	0	3	2	0	0	1	0	0	0	0	2	2850	0	37.7318	30.4889	20.6682	7.35439	5.95413	4.36184	5.70712	5.1399	2.53379	4.46704	3.69213	2.00583	10.4127	8.33264	5.52815	2.05351	1.67627	1.18605	29.6296	5.89012	4.46027	3.38833	8.09116	1.63861
1177	23	0	1	2	0	0	0	0	0	1	0	1	3350	1	37.9302	30.2119	21.5794	7.37888	5.91292	4.54774	5.73806	5.09744	2.70755	4.48432	3.66622	2.12181	10.4721	8.25128	5.80295	2.06442	1.6618	1.23196	29.9072	5.94651	4.51435	3.42412	8.17546	1.65272
1178	23	0	3	3	0	0	1	0	0	0	0	1	3550	0	37.9302	30.2119	21.0429	7.37888	5.91292	4.44107	5.73806	5.09744	2.60183	4.48432	3.66622	2.05317	10.4721	8.25128	5.64126	2.06442	1.6618	1.20559	29.7283	5.91096	4.47911	3.40124	8.12156	1.64394
1179	26	0	3	1	0	0	1	0	0	0	0	1	3150	1	37.9302	30.2119	21.5794	7.37888	5.91292	4.54774	5.73806	5.09744	2.70755	4.48432	3.66622	2.12181	10.4721	8.25128	5.80295	2.06442	1.6618	1.23196	29.9072	5.94651	4.51435	3.42412	8.17546	1.65272
1180	26	0	1	3	0	0	0	0	0	0	0	2	3250	0	37.9302	30.2119	20.0749	7.37888	5.91292	4.22192	5.73806	5.09744	2.43955	4.48432	3.66622	1.94012	10.4721	8.25128	5.34544	2.06442	1.6618	1.15144	29.4057	5.83791	4.42501	3.36355	8.02295	1.62588
1181	31	0	3	1	0	0	1	0	0	0	0	1	3600	1	38.39	29.6274	19.1708	7.43983	5.8244	4.00565	5.76505	5.06373	2.31569	4.50326	3.63897	1.84608	10.5912	8.1096	5.07593	2.07823	1.63787	1.09402	29.0627	5.75663	4.38149	3.32944	7.92556	1.60337
1182	31	0	1	2	0	0	1	0	1	0	0	2	3050	0	38.39	29.6274	19.7972	7.43983	5.8244	4.15567	5.76505	5.06373	2.41488	4.50326	3.63897	1.91897	10.5912	8.1096	5.25936	2.07823	1.63787	1.13182	29.2715	5.80663	4.41456	3.35373	7.9867	1.61597
1183	26	0	1	2	0	0	1	0	0	0	0	1	2900	1	38.7605	29.1805	20.1338	7.48301	5.76917	4.23531	5.90833	4.91809	2.48812	4.58323	3.55671	1.97068	10.6696	8.01728	5.35493	2.08852	1.62716	1.14637	29.3583	5.82916	4.43818	3.37021	8.01393	1.62069
1184	26	0	3	3	0	0	0	0	0	0	0	2	2300	0	38.7605	29.1805	20.3862	7.48301	5.76917	4.29084	5.90833	4.91809	2.53033	4.58323	3.55671	1.9999	10.6696	8.01728	5.42848	2.08852	1.62716	1.15915	29.4424	5.84767	4.45225	3.37995	8.03845	1.62494
1185	29	0	1	1	0	0	1	0	0	0	0	2	3250	1	38.7294	28.7557	19.7007	7.45533	5.70571	4.12288	6.04954	4.71669	2.421	4.66425	3.4364	1.92159	10.6118	7.95161	5.22302	2.06727	1.62453	1.11774	29.0619	5.76131	4.39574	3.34074	7.92882	1.60318
1186	29	0	1	2	0	0	1	0	0	0	0	2	2600	0	38.7294	28.7557	18.7131	7.45533	5.70571	3.88163	6.04954	4.71669	2.25666	4.66425	3.4364	1.80261	10.6118	7.95161	4.93237	2.06727	1.62453	1.05681	28.7327	5.68089	4.34096	3.30108	7.83194	1.58287
1187	25	0	1	3	0	1	0	0	0	0	0	2	3670	0	39.0147	28.2242	20.196	7.48402	5.61981	4.23955	6.16151	4.58497	2.50289	4.74125	3.34564	1.98351	10.6558	7.84011	5.35743	2.07296	1.60664	1.14396	29.145	5.78112	4.41646	3.3568	7.95113	1.60785
1188	25	0	2	2	0	0	1	0	0	0	0	1	3250	1	39.0147	28.2242	18.6408	7.48402	5.61981	3.85617	6.16151	4.58497	2.23531	4.74125	3.34564	1.78636	10.6558	7.84011	4.90761	2.07296	1.60664	1.04772	28.6266	5.65333	4.32726	3.29108	7.80119	1.57577
1189	26	0	1	3	0	1	0	1	0	0	0	1	2650	1	39.266	27.563	20.1747	7.48879	5.51464	4.2262	6.26442	4.44267	2.46645	4.78628	3.26074	1.9567	10.6865	7.6846	5.36092	2.0739	1.5789	1.14304	29.0013	5.74321	4.39118	3.33457	7.91067	1.59861
1190	26	0	1	1	0	1	1	0	0	0	0	2	3420	0	39.266	27.563	19.2189	7.48879	5.51464	3.99422	6.26442	4.44267	2.31178	4.78628	3.26074	1.84372	10.6865	7.6846	5.08083	2.0739	1.5789	1.08526	28.6826	5.66588	4.33962	3.29691	7.81731	1.57935
1191	34	0	3	2	0	0	0	0	0	0	0	1	2800	1	39.5561	27.1148	18.3693	7.51014	5.45444	3.79201	6.41591	4.26961	2.16085	4.85483	3.16558	1.73061	10.7433	7.59035	4.83466	2.07479	1.57179	1.03332	28.3467	5.58553	4.28212	3.25034	7.72277	1.55997
1192	34	0	1	2	0	0	0	0	0	0	0	1	3800	0	39.5561	27.1148	19.1986	7.51014	5.45444	3.98911	6.41591	4.26961	2.30275	4.85483	3.16558	1.83618	10.7433	7.59035	5.06762	2.07479	1.57179	1.08275	28.6232	5.65123	4.32943	3.28553	7.80042	1.57644
1193	35	0	3	1	0	1	1	0	0	0	0	1	3100	1	39.5561	27.1148	19.3173	7.51014	5.45444	4.02011	6.41591	4.26961	2.32371	4.85483	3.16558	1.85135	10.7433	7.59035	5.10265	2.07479	1.57179	1.09049	28.6627	5.66156	4.33641	3.29059	7.8121	1.57903
1194	35	0	3	2	0	1	1	0	0	0	0	1	3000	0	39.5561	27.1148	19.0868	7.51014	5.45444	3.95954	6.41591	4.26961	2.28242	4.85483	3.16558	1.82123	10.7433	7.59035	5.03539	2.07479	1.57179	1.07518	28.5859	5.64137	4.32265	3.28055	7.78968	1.57392
1195	29	0	2	3	0	0	1	0	0	1	0	1	2250	1	40.2919	25.7014	18.9581	7.55354	5.2571	3.91555	6.63846	3.98692	2.19262	4.97601	2.9798	1.76	10.9296	7.18816	5.01917	2.10966	1.49398	1.07441	28.3171	5.57539	4.27267	3.2386	7.71229	1.55935
1196	29	0	1	1	0	0	1	0	1	0	0	2	2750	0	40.2919	25.7014	18.5413	7.55354	5.2571	3.81345	6.63846	3.98692	2.12386	4.97601	2.9798	1.70948	10.9296	7.18816	4.89969	2.10966	1.49398	1.04808	28.1782	5.54136	4.24975	3.22176	7.67247	1.55058
1197	23	0	2	3	0	0	1	0	0	0	0	2	3100	1	40.4056	25.6236	18.7229	7.56843	5.24584	3.87487	6.71552	3.95428	2.11286	5.01784	2.96313	1.7114	10.9333	7.16489	4.98066	2.10938	1.49053	1.06983	28.2507	5.56305	4.26089	3.23079	7.69296	1.55658
1198	23	0	3	1	0	0	0	0	0	0	0	1	4050	0	40.4056	25.6236	19.522	7.56843	5.24584	4.06323	6.71552	3.95428	2.23939	5.01784	2.96313	1.80768	10.9333	7.16489	5.2087	2.10938	1.49053	1.11866	28.5171	5.62583	4.30306	3.26288	7.76898	1.57286
1199	30	0	3	1	0	0	1	0	0	0	0	1	3400	1	41.0453	24.3224	18.4447	7.64765	5.02845	3.80474	6.95683	3.65948	2.00268	5.09792	2.80271	1.64185	11.0409	6.82773	4.92753	2.13023	1.42971	1.06162	27.9374	5.49362	4.20633	3.18083	7.59873	1.54052
1200	30	0	3	3	0	0	0	0	0	0	0	2	2600	0	41.0453	24.3224	17.2401	7.64765	5.02845	3.49861	6.95683	3.65948	1.80725	5.09792	2.80271	1.49959	11.0409	6.82773	4.55361	2.13023	1.42971	0.984789	27.5359	5.39157	4.14119	3.13341	7.47409	1.51491
1201	33	0	1	1	0	0	0	0	0	0	0	2	3350	1	40.9078	24.1985	17.8614	7.61554	4.99937	3.672	6.9216	3.66917	1.89636	5.05811	2.80993	1.56106	11.0016	6.78283	4.76806	2.12474	1.41968	1.03031	27.6559	5.42897	4.16238	3.14303	7.51751	1.52491
1202	33	0	2	1	0	0	1	0	0	0	0	2	2800	0	40.9078	24.1985	17.2207	7.61554	4.99937	3.49594	6.9216	3.66917	1.7881	5.05811	2.80993	1.48419	11.0016	6.78283	4.5592	2.12474	1.41968	0.986239	27.4423	5.37028	4.12629	3.11741	7.44789	1.51022
1203	25	1	2	4	0	0	1	0	0	0	0	2	3800	1	39.9324	24.3504	15.7951	7.39807	5.02562	3.20265	6.7719	3.71091	1.569	4.92207	2.84658	1.32519	10.7348	6.77434	4.16565	2.08029	1.42051	0.907668	26.6926	5.20878	4.01727	3.03128	7.22493	1.46949
1204	25	0	2	3	0	0	1	0	0	0	0	2	2950	0	39.9324	24.3504	15.8437	7.39807	5.02562	3.21489	6.7719	3.71091	1.57717	4.92207	2.84658	1.33198	10.7348	6.77434	4.17864	2.08029	1.42051	0.911221	26.7088	5.21286	4.02	3.03354	7.22926	1.47067
1205	27	0	1	3	0	0	1	0	0	0	0	1	3550	1	39.7019	24.5472	15.6529	7.3449	5.06913	3.16512	6.75019	3.71882	1.55426	4.90258	2.85418	1.31442	10.6701	6.82956	4.12101	2.06846	1.43276	0.897159	26.634	5.19305	4.00776	3.02373	7.20689	1.46612
1206	27	0	3	3	0	1	1	0	0	0	0	2	3740	0	39.7019	24.5472	15.8482	7.3449	5.06913	3.20318	6.75019	3.71882	1.56279	4.90258	2.85418	1.31806	10.6701	6.82956	4.17762	2.06846	1.43276	0.906628	26.6991	5.20574	4.0106	3.02494	7.22576	1.46928
1207	30	0	1	3	0	0	0	0	0	0	0	1	3300	1	39.4835	24.2551	15.5074	7.25955	5.02804	3.11636	6.78124	3.60716	1.51418	4.91142	2.77608	1.28296	10.6136	6.73498	4.07468	2.05759	1.4156	0.882439	26.4154	5.13465	3.96752	2.99015	7.14109	1.45188
1208	30	0	3	2	0	0	0	0	1	0	0	1	2950	0	39.4835	24.2551	15.9411	7.25955	5.02804	3.25202	6.78124	3.60716	1.61964	4.91142	2.77608	1.36543	10.6136	6.73498	4.21551	2.05759	1.4156	0.916729	26.5599	5.17987	4.00268	3.01764	7.18804	1.46331
1209	23	0	3	2	0	0	0	0	0	0	0	1	2400	1	38.5705	24.221	15.4734	7.05358	5.02887	3.12857	6.72427	3.5783	1.49875	4.86185	2.77205	1.27121	10.3452	6.72613	4.07055	1.99751	1.41693	0.887871	26.0883	5.07034	3.93377	2.96837	7.04729	1.4341
1210	23	0	3	1	0	0	1	0	0	1	0	1	4200	0	38.5705	24.221	15.3494	7.05358	5.02887	3.0811	6.72427	3.5783	1.45152	4.86185	2.77205	1.23054	10.3452	6.72613	4.0346	1.99751	1.41693	0.874653	26.047	5.05452	3.91803	2.95482	7.0353	1.4297
1211	33	0	1	3	0	0	0	0	1	0	0	1	3500	0	38.5705	24.221	15.4913	7.05358	5.02887	3.12576	6.72427	3.5783	1.48261	4.86185	2.77205	1.25403	10.3452	6.72613	4.08389	1.99751	1.41693	0.886883	26.0943	5.0694	3.92839	2.96265	7.05173	1.43377
1212	33	0	3	2	0	0	1	0	1	0	0	1	3700	1	38.5705	24.221	15.4104	7.05358	5.02887	3.11875	6.72427	3.5783	1.49035	4.86185	2.77205	1.26242	10.3452	6.72613	4.06008	1.99751	1.41693	0.885826	26.0673	5.06707	3.93097	2.96544	7.0438	1.43342
1213	28	0	1	3	0	0	1	0	0	0	0	2	3400	1	38.4091	24.3458	15.6092	7.0033	5.05376	3.20008	6.71767	3.58509	1.51085	4.85139	2.77552	1.27465	10.2911	6.76619	4.13847	1.98475	1.42535	0.902239	26.1214	5.08572	3.93787	2.96718	7.06525	1.43745
1214	28	0	2	2	0	0	1	0	1	1	0	1	2950	0	38.4091	24.3458	15.1448	7.0033	5.05376	3.04222	6.71767	3.58509	1.40832	4.85139	2.77552	1.19768	10.2911	6.76619	3.97471	1.98475	1.42535	0.863438	25.9666	5.03309	3.90369	2.94153	7.01066	1.42451
1215	30	0	1	2	0	0	0	0	0	0	0	1	2650	1	38.4091	24.3458	15.2814	7.0033	5.05376	3.05223	6.71767	3.58509	1.40592	4.85139	2.77552	1.19915	10.2911	6.76619	4.00348	1.98475	1.42535	0.867265	26.0121	5.03643	3.90289	2.94202	7.02025	1.42579
1216	30	0	3	1	0	0	0	0	1	0	0	2	3250	0	38.4091	24.3458	15.1794	7.0033	5.05376	3.07519	6.71767	3.58509	1.44192	4.85139	2.77552	1.22559	10.2911	6.76619	3.99255	1.98475	1.42535	0.873265	25.9781	5.04408	3.91489	2.95083	7.01661	1.42779
1217	27	0	3	1	0	0	1	0	0	0	0	1	3300	1	38.7848	24.2103	14.606	7.04776	5.05934	2.91509	6.81624	3.52523	1.31759	4.89871	2.75104	1.1269	10.3898	6.73179	3.80544	1.9956	1.41675	0.834761	25.867	5.00739	3.88635	2.92555	6.97567	1.4157
1218	27	0	3	1	0	0	1	0	1	0	0	1	3700	0	38.7848	24.2103	14.6073	7.04776	5.05934	2.91864	6.81624	3.52523	1.32035	4.89871	2.75104	1.12741	10.3898	6.73179	3.81086	1.9956	1.41675	0.835283	25.8675	5.00858	3.88727	2.92572	6.97748	1.41588
1219	34	0	1	1	0	0	0	0	1	0	0	1	2800	1	38.7848	24.2103	14.6242	7.04776	5.05934	2.92641	6.81624	3.52523	1.32454	4.89871	2.75104	1.12969	10.3898	6.73179	3.81877	1.9956	1.41675	0.837155	25.8731	5.01117	3.88867	2.92648	6.98012	1.4165
1220	34	0	1	3	0	0	1	0	1	0	0	2	2500	0	38.7848	24.2103	14.701	7.04776	5.05934	2.90478	6.81624	3.52523	1.30177	4.89871	2.75104	1.11601	10.3898	6.73179	3.82202	1.9956	1.41675	0.831646	25.8987	5.00396	3.88108	2.92192	6.9812	1.41466
1221	35	0	3	2	0	1	1	0	0	0	0	1	3000	1	38.9919	24.0518	14.1301	7.09898	5.01717	2.82002	6.82829	3.50687	1.28503	4.90213	2.73674	1.10414	10.4572	6.68056	3.67499	2.0106	1.40455	0.810621	25.7246	4.97872	3.87339	2.91434	6.93757	1.40859
1222	35	0	3	3	0	1	0	0	1	0	0	1	3350	0	38.9919	24.0518	14.5139	7.09898	5.01717	2.86383	6.82829	3.50687	1.28553	4.90213	2.73674	1.1069	10.4572	6.68056	3.76731	2.0106	1.40455	0.822078	25.8525	4.99333	3.87356	2.91526	6.96835	1.41241
1223	28	0	3	3	0	0	1	0	0	0	0	1	3050	1	38.8278	23.9371	14.3703	7.07033	4.98369	2.85636	6.79086	3.48382	1.30022	4.86483	2.71749	1.11625	10.4168	6.64124	3.73222	2.00749	1.39538	0.82131	25.7117	4.97013	3.8583	2.89952	6.93008	1.40806
1224	28	0	3	3	0	0	0	0	0	0	0	1	3500	0	38.8278	23.9371	14.2504	7.07033	4.98369	2.82063	6.79086	3.48382	1.28028	4.86483	2.71749	1.10194	10.4168	6.64124	3.69212	2.00749	1.39538	0.811321	25.6718	4.95822	3.85165	2.89475	6.91671	1.40473
1225	30	0	3	3	0	0	0	0	0	0	0	1	3200	1	38.8278	23.9371	14.3849	7.07033	4.98369	2.86369	6.79086	3.48382	1.30436	4.86483	2.71749	1.11851	10.4168	6.64124	3.73949	2.00749	1.39538	0.823093	25.7166	4.97257	3.85968	2.90027	6.9325	1.40865
1226	30	0	1	3	0	1	1	1	1	0	0	2	3100	0	38.8278	23.9371	14.3703	7.07033	4.98369	2.85636	6.79086	3.48382	1.30022	4.86483	2.71749	1.11625	10.4168	6.64124	3.73222	2.00749	1.39538	0.82131	25.7117	4.97013	3.8583	2.89952	6.93008	1.40806
1227	27	0	1	3	0	0	0	0	0	0	0	2	3400	1	38.044	24.1457	14.1247	6.89871	5.02435	2.79513	6.72902	3.45153	1.27384	4.81934	2.6909	1.10069	10.179	6.70542	3.65259	1.96529	1.40903	0.805643	25.4381	4.90606	3.81813	2.87031	6.84566	1.39332
1228	27	0	3	4	0	0	1	0	0	0	0	2	3350	0	38.044	24.1457	14.1247	6.89871	5.02435	2.79513	6.72902	3.45153	1.27384	4.81934	2.6909	1.10069	10.179	6.70542	3.65259	1.96529	1.40903	0.805643	25.4381	4.90606	3.81813	2.87031	6.84566	1.39332
1229	30	0	3	3	0	0	0	0	0	0	0	2	3150	1	37.8828	24.0258	14.3626	6.85026	5.01314	2.81645	6.73269	3.39919	1.27256	4.80694	2.65777	1.10193	10.1322	6.67056	3.71136	1.95607	1.40474	0.81097	25.4237	4.89328	3.80148	2.85555	6.83805	1.39059
1230	30	0	3	3	0	1	1	0	0	0	0	2	2620	0	37.8828	24.0258	14.185	6.85026	5.01314	2.80715	6.73269	3.39919	1.28124	4.80694	2.65777	1.10849	10.1322	6.67056	3.66902	1.95607	1.40474	0.809117	25.3645	4.89018	3.80437	2.85773	6.82394	1.38997
1231	29	0	1	3	0	0	1	0	0	0	0	2	3200	1	37.7674	23.6284	14.1147	6.77892	4.96329	2.78665	6.75889	3.2816	1.27284	4.8004	2.58062	1.1018	10.1088	6.53888	3.65237	1.95005	1.38194	0.802961	25.1702	4.84295	3.77111	2.82761	6.76668	1.37832
1232	29	0	1	3	0	0	0	0	1	0	0	1	3550	0	37.7674	23.6284	14.0621	6.77892	4.96329	2.74269	6.75889	3.2816	1.23716	4.8004	2.58062	1.07481	10.1088	6.53888	3.62629	1.95005	1.38194	0.790388	25.1526	4.8283	3.75922	2.81861	6.75799	1.37413
1233	27	0	2	3	0	0	1	0	1	0	0	1	3350	1	37.846	23.5504	13.9903	6.79193	4.95162	2.71141	6.77131	3.22094	1.20792	4.78359	2.54926	1.04931	10.1642	6.50348	3.5849	1.96059	1.37798	0.783606	25.1289	4.81832	3.73339	2.79406	6.75085	1.37406
1234	27	0	1	1	0	0	1	0	0	0	0	2	3000	0	37.846	23.5504	13.6295	6.79193	4.95162	2.67393	6.77131	3.22094	1.20427	4.78359	2.54926	1.04236	10.1642	6.50348	3.49683	1.96059	1.37798	0.772737	25.0086	4.80583	3.73217	2.79174	6.72149	1.37044
1235	28	0	1	1	0	0	1	0	0	0	0	1	3200	1	37.846	23.5504	13.5896	6.79193	4.95162	2.62999	6.77131	3.22094	1.16858	4.78359	2.54926	1.01965	10.1642	6.50348	3.46439	1.96059	1.37798	0.759531	24.9953	4.79118	3.72028	2.78417	6.71068	1.36603
1236	28	0	3	2	0	0	1	0	0	0	0	2	3650	0	37.846	23.5504	13.5313	6.79193	4.95162	2.62336	6.77131	3.22094	1.16571	4.78359	2.54926	1.01759	10.1642	6.50348	3.44942	1.96059	1.37798	0.757911	24.9759	4.78897	3.71932	2.78348	6.70569	1.36549
1237	28	0	1	3	0	0	1	0	0	0	0	1	3000	1	37.7112	23.5622	13.4102	6.77258	4.95682	2.59258	6.76097	3.22063	1.14854	4.77443	2.55123	1.00119	10.1363	6.50368	3.41749	1.95686	1.38042	0.747744	24.8946	4.77399	3.71005	2.77561	6.68583	1.36167
1238	28	0	3	2	0	0	0	0	0	0	0	1	4100	0	37.7112	23.5622	13.8804	6.77258	4.95682	2.69017	6.76097	3.22063	1.19311	4.77443	2.55123	1.03488	10.1363	6.50368	3.55246	1.95686	1.38042	0.775017	25.0513	4.80652	3.7249	2.78684	6.73082	1.37077
1239	28	0	3	1	0	0	0	0	0	0	0	2	2900	1	37.7112	23.5622	13.6143	6.77258	4.95682	2.62733	6.76097	3.22063	1.16369	4.77443	2.55123	1.0122	10.1363	6.50368	3.47823	1.95686	1.38042	0.758024	24.9626	4.78558	3.7151	2.77928	6.70607	1.3651
1240	28	0	3	3	0	0	1	0	0	0	0	2	2850	0	37.7112	23.5622	13.7365	6.77258	4.95682	2.66701	6.76097	3.22063	1.18761	4.77443	2.55123	1.03241	10.1363	6.50368	3.5123	1.95686	1.38042	0.769702	25.0033	4.7988	3.72307	2.78602	6.71743	1.36899
1241	31	0	2	3	0	0	1	0	0	0	0	1	3950	1	37.4027	23.5588	13.5006	6.71784	4.96039	2.60059	6.7348	3.21322	1.15045	4.75535	2.54711	1.00675	10.0567	6.50136	3.43023	1.94286	1.38129	0.749848	24.8207	4.75961	3.69949	2.76974	6.66276	1.358
1242	31	0	1	1	0	0	1	0	0	0	0	2	2950	0	37.4027	23.5588	13.5231	6.71784	4.96039	2.60039	6.7348	3.21322	1.14852	4.75535	2.54711	1.00515	10.0567	6.50136	3.43653	1.94286	1.38129	0.750191	24.8282	4.75954	3.69885	2.7692	6.66486	1.35811
1243	30	0	3	2	0	0	1	0	0	0	0	2	3750	1	36.874	23.589	13.3538	6.6267	4.95846	2.55405	6.70321	3.17329	1.12588	4.7292	2.51467	0.993197	9.89654	6.51559	3.37035	1.91256	1.38587	0.739527	24.6056	4.71307	3.66746	2.74569	6.59416	1.34598
1244	30	0	3	2	0	0	0	0	0	0	0	2	3000	0	36.874	23.589	13.386	6.6267	4.95846	2.57371	6.70321	3.17329	1.13387	4.7292	2.51467	0.995552	9.89654	6.51559	3.39468	1.91256	1.38587	0.742803	24.6164	4.71963	3.67013	2.74648	6.60227	1.34708
1245	28	0	3	3	0	0	1	0	0	0	0	1	3150	1	36.6652	23.5247	13.2452	6.59066	4.94302	2.55888	6.6891	3.13516	1.12884	4.70304	2.48539	0.990014	9.82528	6.50295	3.36418	1.89876	1.38327	0.737862	24.4784	4.69752	3.65103	2.72615	6.56414	1.33996
1246	28	0	3	3	0	0	0	0	0	0	0	1	3250	0	36.6652	23.5247	13.1946	6.59066	4.94302	2.54967	6.6891	3.13516	1.12453	4.70304	2.48539	0.987264	9.82528	6.50295	3.34912	1.89876	1.38327	0.73521	24.4615	4.69445	3.64959	2.72523	6.55912	1.33908
1247	26	0	1	3	0	0	1	0	0	0	0	1	3300	1	36.3433	23.1552	13.0576	6.52525	4.8912	2.50048	6.62397	3.04329	1.09535	4.6192	2.43144	0.972056	9.74451	6.41054	3.28552	1.88364	1.36946	0.720984	24.1854	4.63898	3.58754	2.67423	6.48019	1.32469
1248	26	0	2	3	0	0	1	0	0	0	0	1	3450	0	36.3433	23.1552	13.0553	6.52525	4.8912	2.4891	6.62397	3.04329	1.0887	4.6192	2.43144	0.967035	9.74451	6.41054	3.28175	1.88364	1.36946	0.71856	24.1846	4.63519	3.58532	2.67256	6.47893	1.32388
1249	30	0	1	3	0	0	1	0	0	0	0	1	3200	1	36.3433	23.1552	13.1305	6.52525	4.8912	2.48693	6.62397	3.04329	1.08999	4.6192	2.43144	0.972462	9.74451	6.41054	3.28473	1.88364	1.36946	0.720795	24.2097	4.63446	3.58575	2.67437	6.47993	1.32463
1250	30	0	3	4	1	0	0	0	0	0	0	1	3150	0	36.3433	23.1552	13.1117	6.52525	4.8912	2.50081	6.62397	3.04329	1.09379	4.6192	2.43144	0.970775	9.74451	6.41054	3.29896	1.88364	1.36946	0.721615	24.2034	4.63909	3.58702	2.67381	6.48467	1.3249
1251	30	0	3	4	0	0	0	0	0	1	0	1	3150	1	36.1019	23.1224	13.5007	6.47929	4.88237	2.58463	6.5582	3.03821	1.13342	4.56755	2.42383	1.00069	9.6905	6.4041	3.41292	1.8766	1.36486	0.74429	24.2417	4.64876	3.57661	2.66402	6.50251	1.32858
1252	30	0	3	2	0	0	0	0	1	0	0	1	3100	0	36.1019	23.1224	13.0209	6.47929	4.88237	2.48789	6.5582	3.03821	1.09046	4.56755	2.42383	0.967049	9.6905	6.4041	3.27844	1.8766	1.36486	0.717385	24.0817	4.61652	3.56229	2.65281	6.45768	1.31961
1253	31	0	3	2	0	0	0	0	0	0	0	2	3050	1	36.1019	23.1224	12.9935	6.47929	4.88237	2.48512	6.5582	3.03821	1.08811	4.56755	2.42383	0.96668	9.6905	6.4041	3.26712	1.8766	1.36486	0.716353	24.0726	4.61559	3.56151	2.65269	6.45391	1.31927
1254	31	0	1	4	0	0	0	0	0	0	0	2	3000	0	36.1019	23.1224	13.1862	6.47929	4.88237	2.48808	6.5582	3.03821	1.09124	4.56755	2.42383	0.974624	9.6905	6.4041	3.29569	1.8766	1.36486	0.722386	24.1369	4.61658	3.56255	2.65534	6.46343	1.32128
1255	27	0	1	3	0	0	1	0	0	0	0	1	2750	1	35.7912	23.1954	13.0486	6.42235	4.89591	2.48185	6.47885	3.04614	1.08273	4.50586	2.4274	0.965083	9.62814	6.42129	3.27394	1.86838	1.36489	0.71706	24.0117	4.60004	3.53591	2.63278	6.44112	1.31677
1256	27	0	1	3	0	0	1	0	0	0	0	2	3450	0	35.7912	23.1954	12.9784	6.42235	4.89591	2.46248	6.47885	3.04614	1.07259	4.50586	2.4274	0.957508	9.62814	6.42129	3.25257	1.86838	1.36489	0.712579	23.9883	4.59358	3.53253	2.63025	6.434	1.31528
1257	28	0	3	3	0	0	0	0	0	0	0	2	3300	1	35.1328	23.4325	12.7648	6.28598	4.95168	2.40709	6.39202	3.04201	1.0445	4.42878	2.42716	0.940171	9.44077	6.49635	3.17944	1.83072	1.38205	0.69865	23.7767	4.54825	3.49284	2.59871	6.37219	1.30381
1258	28	0	3	1	0	0	1	0	0	0	0	2	3100	0	35.1328	23.4325	12.7851	6.28598	4.95168	2.41269	6.39202	3.04201	1.04708	4.42878	2.42716	0.941633	9.44077	6.49635	3.18679	1.83072	1.38205	0.699859	23.7835	4.55012	3.4937	2.59919	6.37464	1.30421
1259	30	0	3	3	0	0	1	0	0	0	0	1	2850	1	35.1328	23.4325	12.8107	6.28598	4.95168	2.39923	6.39202	3.04201	1.045	4.42878	2.42716	0.943198	9.44077	6.49635	3.17759	1.83072	1.38205	0.699511	23.792	4.54563	3.49301	2.59971	6.37157	1.30409
1260	30	0	3	4	0	0	0	0	0	0	0	1	3200	0	35.1328	23.4325	12.9417	6.28598	4.95168	2.42864	6.39202	3.04201	1.05866	4.42878	2.42716	0.954945	9.44077	6.49635	3.21204	1.83072	1.38205	0.707705	23.8357	4.55543	3.49756	2.60363	6.38305	1.30683
1261	24	0	3	3	0	0	0	0	0	0	0	1	2900	1	34.7758	23.4519	12.8022	6.19889	4.96723	2.39328	6.36451	3.02396	1.04012	4.40797	2.41523	0.940764	9.33809	6.49847	3.17009	1.81085	1.38351	0.698024	23.6766	4.5198	3.4762	2.58799	6.33555	1.29746
1262	24	0	1	3	0	0	0	0	0	0	0	2	3550	0	34.7758	23.4519	12.8181	6.19889	4.96723	2.41266	6.36451	3.02396	1.04729	4.40797	2.41523	0.939561	9.33809	6.49847	3.20343	1.81085	1.38351	0.700401	23.6819	4.52626	3.47859	2.58758	6.34666	1.29825
1263	32	0	3	1	0	0	1	0	0	0	0	1	3250	1	34.5371	23.2999	12.8136	6.12719	4.9578	2.39002	6.34524	2.98769	1.03496	4.39358	2.38989	0.935825	9.28681	6.44023	3.16941	1.80104	1.37193	0.698787	23.5502	4.49167	3.45597	2.5731	6.29882	1.29058
1264	32	0	3	3	0	0	1	0	0	0	0	1	3050	0	34.5371	23.2999	12.6386	6.12719	4.9578	2.37573	6.34524	2.98769	1.02483	4.39358	2.38989	0.92147	9.28681	6.44023	3.14696	1.80104	1.37193	0.690956	23.4919	4.4869	3.45259	2.56832	6.29133	1.28797
1265	25	0	2	2	0	0	1	0	0	0	0	1	3400	1	34.2968	23.0071	12.2995	6.08205	4.93139	2.28485	6.30724	2.91027	0.971979	4.35955	2.32957	0.879949	9.26863	6.32454	3.03938	1.80121	1.34779	0.667906	23.2011	4.43276	3.39649	2.52302	6.21085	1.2723
1266	25	0	3	2	0	0	1	0	0	0	0	1	3200	0	34.2968	23.0071	12.4385	6.08205	4.93139	2.30866	6.30724	2.91027	0.981774	4.35955	2.32957	0.888984	9.26863	6.32454	3.07328	1.80121	1.34779	0.674446	23.2475	4.4407	3.39976	2.52603	6.22215	1.27448
1267	27	0	1	4	0	0	0	0	0	0	0	1	2900	0	34.1475	22.512	12.4179	6.08608	4.82569	2.27865	6.26014	2.81486	0.97395	4.34439	2.24882	0.888509	9.27696	6.1428	3.04526	1.8026	1.31608	0.669433	23.0258	4.3968	3.34965	2.49391	6.15501	1.2627
1268	27	0	3	1	0	0	1	0	0	0	0	1	3100	1	34.1475	22.512	12.4731	6.08608	4.82569	2.28493	6.26014	2.81486	0.978881	4.34439	2.24882	0.892044	9.27696	6.1428	3.06048	1.8026	1.31608	0.672076	23.0442	4.3989	3.3513	2.49509	6.16008	1.26359
1269	29	0	2	3	0	0	0	0	0	0	0	1	3000	1	34.1475	22.512	13.2249	6.08608	4.82569	2.4598	6.26014	2.81486	1.06237	4.34439	2.24882	0.949555	9.27696	6.1428	3.27687	1.8026	1.31608	0.716613	23.2948	4.45719	3.37912	2.51426	6.23221	1.27843
1270	29	0	1	3	0	0	0	0	0	0	0	1	3200	0	34.1475	22.512	12.364	6.08608	4.82569	2.26774	6.26014	2.81486	0.97097	4.34439	2.24882	0.885008	9.27696	6.1428	3.03268	1.8026	1.31608	0.666834	23.0078	4.39317	3.34866	2.49274	6.15082	1.26184
1271	28	0	2	1	0	0	0	0	0	0	0	2	2950	1	34.1111	22.3356	13.1924	6.09015	4.78442	2.44537	6.24752	2.78659	1.0538	4.333	2.23005	0.943353	9.28011	6.07979	3.26491	1.80185	1.30674	0.71317	23.213	4.43998	3.36264	2.50213	6.20827	1.27392
1272	28	0	2	2	0	0	0	0	0	0	0	2	3400	0	34.1111	22.3356	13.2557	6.09015	4.78442	2.4629	6.24752	2.78659	1.06344	4.333	2.23005	0.949724	9.28011	6.07979	3.28552	1.80185	1.30674	0.717512	23.2341	4.44582	3.36585	2.50426	6.21514	1.27537
1273	33	0	3	3	0	0	0	0	0	0	0	1	3000	1	34.1111	22.3356	14.0699	6.09015	4.78442	2.6439	6.24752	2.78659	1.19048	4.333	2.23005	1.04217	9.28011	6.07979	3.53079	1.80185	1.30674	0.767602	23.5055	4.50616	3.4082	2.53507	6.2969	1.29207
1274	33	0	1	3	0	0	0	0	1	0	0	2	2750	0	34.1111	22.3356	13.7644	6.09015	4.78442	2.57033	6.24752	2.78659	1.14839	4.333	2.23005	1.01006	9.28011	6.07979	3.43626	1.80185	1.30674	0.748692	23.4037	4.48164	3.39417	2.52437	6.26539	1.28576
1275	30	0	1	1	0	0	1	0	0	0	0	2	3900	1	34.1859	22.2146	12.2569	6.11619	4.75177	2.26454	6.23943	2.77371	0.963161	4.32564	2.22161	0.873835	9.31428	6.0324	3.02452	1.80979	1.29794	0.662641	22.8858	4.3775	3.32543	2.4737	6.12374	1.25679
1276	30	0	3	3	0	0	0	0	0	0	0	1	3250	0	34.1859	22.2146	12.3099	6.11619	4.75177	2.2626	6.23943	2.77371	0.963326	4.32564	2.22161	0.875737	9.31428	6.0324	3.03119	1.80979	1.29794	0.663359	22.9035	4.37685	3.32549	2.47433	6.12596	1.25703
1277	33	0	3	2	0	0	0	0	0	0	0	1	3600	1	34.1592	22.0644	13.4473	6.13401	4.71354	2.50678	6.21277	2.75286	1.08731	4.30613	2.2081	0.965356	9.32343	5.97707	3.35231	1.81267	1.28805	0.729246	23.2236	4.45144	3.35098	2.49319	6.2176	1.27666
1278	33	0	1	3	0	1	0	1	0	0	0	1	3100	0	34.1592	22.0644	13.4473	6.13401	4.71354	2.50678	6.21277	2.75286	1.08731	4.30613	2.2081	0.965356	9.32343	5.97707	3.35231	1.81267	1.28805	0.729246	23.2236	4.45144	3.35098	2.49319	6.2176	1.27666
1279	34	0	3	2	0	0	0	0	0	0	0	2	2800	1	34.1592	22.0644	12.7321	6.13401	4.71354	2.33969	6.21277	2.75286	1.01018	4.30613	2.2081	0.910821	9.32343	5.97707	3.14157	1.81267	1.28805	0.687454	22.9852	4.39574	3.32527	2.47502	6.14736	1.26273
1280	34	0	1	1	0	1	0	1	0	0	0	1	2550	0	34.1592	22.0644	14.6943	6.13401	4.71354	2.79666	6.21277	2.75286	1.28102	4.30613	2.2081	1.11216	9.32343	5.97707	3.73115	1.81267	1.28805	0.80659	23.6393	4.54807	3.41555	2.54213	6.34388	1.30244
1281	29	0	1	3	0	0	0	0	0	0	0	2	3200	1	34.0879	21.9077	12.5086	6.14486	4.67233	2.2806	6.20363	2.72628	0.975753	4.30275	2.18733	0.886077	9.29942	5.9209	3.08203	1.80914	1.27841	0.672043	22.8347	4.36593	3.30189	2.45872	6.10078	1.2532
1282	29	0	3	3	0	0	1	0	0	0	0	1	2500	0	34.0879	21.9077	12.451	6.14486	4.67233	2.27391	6.20363	2.72628	0.970512	4.30275	2.18733	0.882271	9.29942	5.9209	3.06627	1.80914	1.27841	0.669257	22.8155	4.3637	3.30014	2.45745	6.09553	1.25227
1283	24	0	3	2	0	0	1	0	0	0	0	2	3000	1	33.9492	21.7454	12.9767	6.14059	4.62858	2.39614	6.18421	2.70404	1.03268	4.29385	2.17017	0.924696	9.25862	5.8626	3.21713	1.80376	1.26652	0.702521	22.8904	4.38844	3.30698	2.4629	6.11278	1.2576
1284	24	0	3	3	0	0	0	0	0	0	0	1	3500	0	33.9492	21.7454	12.5216	6.14059	4.62858	2.28085	6.18421	2.70404	0.975473	4.29385	2.17017	0.885028	9.25862	5.8626	3.08971	1.80376	1.26652	0.67245	22.7387	4.35001	3.28791	2.44968	6.07031	1.24758
1285	28	0	3	3	0	0	1	0	0	0	0	1	2800	1	33.5645	21.5568	15.4462	6.09474	4.59287	2.97475	6.10583	2.68695	1.38105	4.24507	2.15738	1.19113	9.15289	5.80197	3.95843	1.78103	1.25582	0.851296	23.5225	4.55412	3.39128	2.53119	6.30443	1.29605
1286	28	0	1	3	0	0	0	0	0	0	0	2	3500	0	33.5645	21.5568	14.2933	6.09474	4.59287	2.68548	6.10583	2.68695	1.21484	4.24507	2.15738	1.05637	9.15289	5.80197	3.6129	1.78103	1.25582	0.77946	23.1382	4.4577	3.33587	2.48627	6.18925	1.2721
1287	30	0	1	1	0	1	0	1	0	0	0	1	1750	1	33.2541	21.4157	13.2975	6.07176	4.56049	2.45169	6.01168	2.67553	1.0556	4.19135	2.14895	0.940229	9.06886	5.75654	3.30717	1.76725	1.24801	0.716284	22.6558	4.36131	3.2476	2.42684	6.04419	1.24385
1288	30	0	2	2	0	0	1	0	0	0	0	1	3300	0	33.2541	21.4157	12.41	6.07176	4.56049	2.27155	6.01168	2.67553	0.963948	4.19135	2.14895	0.869824	9.06886	5.75654	3.07925	1.76725	1.24801	0.665578	22.3599	4.30127	3.21705	2.40337	5.96822	1.22694
1289	33	0	3	3	0	0	0	0	1	0	0	2	1500	1	32.7242	21.1641	14.0222	6.0128	4.49369	2.60139	5.87509	2.62986	1.1659	4.10138	2.11055	1.0169	8.93389	5.67295	3.52498	1.74419	1.23207	0.75751	22.6368	4.36929	3.22362	2.40961	6.04394	1.24459
1290	33	0	1	3	0	0	1	0	0	1	0	1	2900	0	32.7242	21.1641	15.771	6.0128	4.49369	3.04264	5.87509	2.62986	1.41702	4.10138	2.11055	1.22247	8.93389	5.67295	4.03745	1.74419	1.23207	0.870817	23.2197	4.51638	3.30732	2.47813	6.21477	1.28236
1291	32	0	3	3	0	1	1	1	0	0	0	2	2900	1	32.7511	21.1327	12.5809	6.01674	4.48354	2.28026	5.87988	2.60547	0.972756	4.10481	2.09435	0.880768	8.94461	5.66892	3.1083	1.74625	1.2321	0.670448	22.1549	4.26018	3.1527	2.35998	5.90728	1.21626
1292	32	0	1	3	0	0	1	0	0	0	0	2	3150	0	32.7511	21.1327	12.5809	6.01674	4.48354	2.28026	5.87988	2.60547	0.972756	4.10481	2.09435	0.880768	8.94461	5.66892	3.1083	1.74625	1.2321	0.670448	22.1549	4.26018	3.1527	2.35998	5.90728	1.21626
1293	28	0	3	3	0	0	0	0	0	0	0	2	3100	1	32.5476	20.5693	13.2917	6.02074	4.3466	2.44157	5.721	2.53946	1.05117	4.01971	2.03776	0.938198	8.92228	5.50451	3.30434	1.75957	1.19089	0.714322	22.1362	4.26964	3.10388	2.33189	5.91038	1.22159
1294	28	0	3	3	0	0	0	0	0	0	0	1	3300	0	32.5476	20.5693	12.6804	6.02074	4.3466	2.29448	5.721	2.53946	0.978762	4.01971	2.03776	0.886382	8.92228	5.50451	3.13645	1.75957	1.19089	0.675328	21.9324	4.22061	3.07974	2.31462	5.85442	1.2086
1295	31	0	3	1	0	1	0	1	0	0	0	2	3800	1	32.5476	20.5693	15.2673	6.02074	4.3466	2.90028	5.721	2.53946	1.33543	4.01971	2.03776	1.15109	8.92228	5.50451	3.90311	1.75957	1.19089	0.834096	22.7947	4.42254	3.19863	2.40285	6.10997	1.26152
1296	31	0	1	1	0	0	1	0	0	0	0	1	3450	0	32.5476	20.5693	16.0751	6.02074	4.3466	3.10734	5.721	2.53946	1.44987	4.01971	2.03776	1.24948	8.92228	5.50451	4.12271	1.75957	1.19089	0.888247	23.064	4.49156	3.23678	2.43565	6.18317	1.27957
1297	25	0	3	2	1	0	0	0	0	0	0	2	1350	1	32.3123	20.5092	14.974	5.996	4.32768	2.82496	5.64986	2.52013	1.28852	3.98014	2.02096	1.11276	8.85735	5.4866	3.81379	1.75256	1.18739	0.815145	22.5985	4.38288	3.15284	2.37129	6.05258	1.2517
1298	25	0	3	3	0	1	1	0	1	0	0	1	3280	0	32.3123	20.5092	16.3616	5.996	4.32768	3.15464	5.64986	2.52013	1.48266	3.98014	2.02096	1.27802	8.85735	5.4866	4.18215	1.75256	1.18739	0.903587	23.061	4.49278	3.21755	2.42637	6.17537	1.28118
1299	24	0	3	3	0	0	1	0	0	0	0	1	3700	1	32.2553	20.3218	13.6537	6.00899	4.28081	2.51609	5.62534	2.47569	1.08297	3.97513	1.9809	0.962054	8.83567	5.43427	3.40526	1.75185	1.17631	0.734054	22.0769	4.26863	3.06133	2.30603	5.89173	1.22074
1300	24	0	1	3	0	0	1	0	1	0	0	1	3600	0	32.2553	20.3218	16.4814	6.00899	4.28081	3.18092	5.62534	2.47569	1.49647	3.97513	1.9809	1.2882	8.83567	5.43427	4.21661	1.75185	1.17631	0.910589	23.0195	4.49024	3.19917	2.41474	6.16218	1.27958
1301	26	0	3	2	0	0	0	0	0	0	0	2	3500	1	32.2553	20.3218	15.8474	6.00899	4.28081	3.03781	5.62534	2.47569	1.41706	3.97513	1.9809	1.2178	8.83567	5.43427	4.07252	1.75185	1.17631	0.868933	22.8082	4.44254	3.1727	2.39128	6.11415	1.2657
1302	26	0	1	1	0	0	0	0	0	0	0	1	3000	0	32.2553	20.3218	16.2701	6.00899	4.28081	3.1511	5.62534	2.47569	1.47113	3.97513	1.9809	1.2659	8.83567	5.43427	4.17839	1.75185	1.17631	0.899983	22.9491	4.4803	3.19072	2.40731	6.14945	1.27605
1303	28	0	1	2	0	0	1	0	0	0	0	1	3350	1	32.2553	20.3218	16.4826	6.00899	4.28081	3.18909	5.62534	2.47569	1.50043	3.97513	1.9809	1.29167	8.83567	5.43427	4.21963	1.75185	1.17631	0.912014	23.0199	4.49296	3.20049	2.4159	6.16319	1.28006
1304	28	0	3	1	0	0	1	0	0	0	0	2	2850	0	32.2553	20.3218	16.454	6.00899	4.28081	3.17581	5.62534	2.47569	1.49306	3.97513	1.9809	1.28619	8.83567	5.43427	4.20813	1.75185	1.17631	0.909334	23.0104	4.48854	3.19803	2.41407	6.15936	1.27917
1305	33	0	1	2	0	0	0	0	1	0	0	1	3550	1	32.2822	20.1081	15.531	6.04106	4.22584	2.95977	5.59875	2.44933	1.36409	3.95552	1.962	1.17252	8.84255	5.36776	3.97938	1.75796	1.16113	0.849938	22.6404	4.40889	3.13739	2.36335	6.06323	1.25634
1306	33	0	1	3	0	0	0	0	0	0	0	1	3300	0	32.2822	20.1081	15.531	6.04106	4.22584	2.95977	5.59875	2.44933	1.36409	3.95552	1.962	1.17252	8.84255	5.36776	3.97938	1.75796	1.16113	0.849938	22.6404	4.40889	3.13739	2.36335	6.06323	1.25634
1307	33	0	3	2	0	0	1	0	1	0	0	2	3400	1	31.7622	18.9672	16.9835	6.09788	3.94788	3.29883	5.4037	2.24355	1.55772	3.86129	1.79188	1.33799	8.69919	5.02894	4.35445	1.74494	1.08458	0.943647	22.571	4.4482	3.06832	2.33039	6.02753	1.25772
1308	33	0	2	2	0	0	1	0	0	0	0	1	3650	0	31.7622	18.9672	15.9618	6.09788	3.94788	3.0593	5.4037	2.24355	1.4155	3.86129	1.79188	1.21344	8.69919	5.02894	4.09958	1.74494	1.08458	0.878154	22.2304	4.36835	3.02092	2.28887	5.94257	1.23589
1309	24	0	1	3	0	0	0	0	0	0	0	1	3400	1	31.432	18.8224	16.961	6.06425	3.91668	3.30086	5.33845	2.22459	1.5555	3.81572	1.77833	1.33611	8.59465	4.98752	4.35768	1.72537	1.07568	0.941838	22.4051	4.42726	3.03951	2.31005	5.97995	1.24763
1310	24	0	1	1	0	0	0	0	0	0	0	1	3400	0	31.432	18.8224	15.3671	6.06425	3.91668	2.90219	5.33845	2.22459	1.32493	3.81572	1.77833	1.1414	8.59465	4.98752	3.91227	1.72537	1.07568	0.838433	21.8739	4.29437	2.96266	2.24515	5.83148	1.21316
1311	33	0	1	1	0	0	1	0	0	0	0	2	2600	1	31.0134	18.6457	16.9854	6.01711	3.88153	3.30743	5.25074	2.1897	1.55433	3.76202	1.75511	1.33311	8.47556	4.94017	4.37387	1.70343	1.06633	0.942367	22.2148	4.40202	2.99825	2.28341	5.92987	1.23737
1312	33	0	3	2	0	0	1	0	1	0	0	2	3400	0	31.0134	18.6457	16.553	6.01711	3.88153	3.22824	5.25074	2.1897	1.51636	3.76202	1.75511	1.30719	8.47556	4.94017	4.23463	1.70343	1.06633	0.923999	22.0707	4.37563	2.9856	2.27477	5.88345	1.23125
1313	29	0	1	3	0	0	0	0	0	0	0	1	3800	1	29.9653	18.146	17.2322	5.86914	3.75728	3.3635	5.08239	2.13072	1.58887	3.65511	1.71	1.36335	8.18739	4.78886	4.42119	1.65036	1.03269	0.959719	21.7811	4.32997	2.93399	2.24282	5.79915	1.21426
1314	29	0	2	2	0	0	0	0	0	0	0	1	3500	0	29.9653	18.146	17.4648	5.86914	3.75728	3.40487	5.08239	2.13072	1.61582	3.65511	1.71	1.38402	8.18739	4.78886	4.48711	1.65036	1.03269	0.970694	21.8587	4.34377	2.94298	2.24971	5.82112	1.21792
1315	29	0	1	3	0	0	0	0	0	0	0	1	3000	1	29.6274	17.9984	16.8147	5.8244	3.71795	3.31069	5.06373	2.11134	1.56293	3.63897	1.69523	1.33861	8.1096	4.74117	4.30761	1.63787	1.02083	0.944705	21.4801	4.28435	2.91267	2.22427	5.71946	1.20113
1316	29	0	1	3	0	0	1	0	0	0	0	2	3100	0	29.6274	17.9984	16.8336	5.8244	3.71795	3.29992	5.06373	2.11134	1.55287	3.63897	1.69523	1.33511	8.1096	4.74117	4.31664	1.63787	1.02083	0.943655	21.4864	4.28075	2.90931	2.2231	5.72247	1.20078
1317	26	0	1	2	0	0	0	0	0	0	0	1	1400	1	29.1805	17.9192	16.8447	5.76917	3.69265	3.30018	4.91809	2.09758	1.55509	3.55671	1.68576	1.33682	8.01728	4.71021	4.3165	1.62716	1.01133	0.943235	21.3148	4.254	2.85692	2.1931	5.68133	1.19391
1318	26	0	3	3	0	0	1	0	1	0	0	2	2950	0	29.1805	17.9192	17.0484	5.76917	3.69265	3.33308	4.91809	2.09758	1.57277	3.55671	1.68576	1.35272	8.01728	4.71021	4.36491	1.62716	1.01133	0.952485	21.3827	4.26497	2.86281	2.1984	5.69747	1.19699
1319	26	0	3	1	0	0	0	0	0	0	0	2	2950	1	29.1805	17.9192	16.8333	5.76917	3.69265	3.30489	4.91809	2.09758	1.55628	3.55671	1.68576	1.33676	8.01728	4.71021	4.31922	1.62716	1.01133	0.944388	21.311	4.25557	2.85732	2.19308	5.68224	1.19429
1320	26	0	2	1	0	0	1	0	0	0	0	1	3200	0	29.1805	17.9192	16.977	5.76917	3.69265	3.35754	4.91809	2.09758	1.58526	3.55671	1.68576	1.34961	8.01728	4.71021	4.37175	1.62716	1.01133	0.957143	21.3589	4.27312	2.86698	2.19736	5.69975	1.19854
1321	34	0	3	3	0	0	1	0	0	0	0	1	3600	1	29.1805	17.9192	17.5013	5.76917	3.69265	3.42632	4.91809	2.09758	1.623	3.55671	1.68576	1.38998	8.01728	4.71021	4.49623	1.62716	1.01133	0.975842	21.5336	4.29605	2.87956	2.21082	5.74124	1.20478
1322	34	0	1	3	0	0	0	0	0	1	0	2	2050	0	29.1805	17.9192	16.8447	5.76917	3.69265	3.30018	4.91809	2.09758	1.55509	3.55671	1.68576	1.33682	8.01728	4.71021	4.3165	1.62716	1.01133	0.943235	21.3148	4.254	2.85692	2.1931	5.68133	1.19391
1323	31	0	1	4	0	0	0	0	1	0	0	2	2950	1	28.9146	17.8237	16.7048	5.72884	3.66775	3.29415	4.79325	2.08749	1.54862	3.4902	1.67942	1.32543	7.96709	4.6804	4.29702	1.62361	1.00451	0.940237	21.1477	4.23025	2.80979	2.16502	5.64817	1.18945
1324	31	0	3	3	0	0	0	0	0	0	0	1	3250	0	28.9146	17.8237	16.8818	5.72884	3.66775	3.31844	4.79325	2.08749	1.56344	3.4902	1.67942	1.34164	7.96709	4.6804	4.3361	1.62361	1.00451	0.94759	21.2067	4.23834	2.81473	2.17042	5.6612	1.1919
1325	32	0	2	2	0	1	0	1	0	0	0	1	2000	1	28.9146	17.8237	16.8818	5.72884	3.66775	3.31844	4.79325	2.08749	1.56344	3.4902	1.67942	1.34164	7.96709	4.6804	4.3361	1.62361	1.00451	0.94759	21.2067	4.23834	2.81473	2.17042	5.6612	1.1919
1326	32	0	3	2	0	0	0	0	0	1	0	1	3750	0	28.9146	17.8237	17.4935	5.72884	3.66775	3.42435	4.79325	2.08749	1.62194	3.4902	1.67942	1.38907	7.96709	4.6804	4.49517	1.62361	1.00451	0.975	21.4106	4.27364	2.83423	2.18623	5.71422	1.20104
1327	24	0	3	1	1	0	1	0	0	1	0	1	3150	1	28.7557	17.7067	17.819	5.70571	3.63061	3.50331	4.71669	2.06984	1.66319	3.4364	1.6671	1.41873	7.95161	4.63842	4.59759	1.62453	0.995504	0.994945	21.4271	4.27988	2.81657	2.17408	5.72921	1.20499
1328	24	0	3	3	0	1	0	1	0	0	0	2	3500	0	28.7557	17.7067	17.8071	5.70571	3.63061	3.48375	4.71669	2.06984	1.65771	3.4364	1.6671	1.41463	7.95161	4.63842	4.58867	1.62453	0.995504	0.991394	21.4232	4.27336	2.81474	2.17271	5.72623	1.20381
1329	29	0	3	4	0	0	0	0	0	0	0	1	3000	1	28.7557	17.7067	17.165	5.70571	3.63061	3.40573	4.71669	2.06984	1.6098	3.4364	1.6671	1.367	7.95161	4.63842	4.43206	1.62453	0.995504	0.969077	21.2091	4.24735	2.79878	2.15683	5.67403	1.19637
1330	29	0	3	2	0	0	1	0	0	0	0	2	2900	0	28.7557	17.7067	17.7537	5.70571	3.63061	3.48837	4.71669	2.06984	1.65471	3.4364	1.6671	1.413	7.95161	4.63842	4.57544	1.62453	0.995504	0.991275	21.4054	4.2749	2.81375	2.17216	5.72182	1.20377
1331	30	0	3	1	0	0	0	0	0	0	0	2	3450	1	28.7557	17.7067	17.7157	5.70571	3.63061	3.47813	4.71669	2.06984	1.65005	3.4364	1.6671	1.40657	7.95161	4.63842	4.57944	1.62453	0.995504	0.98747	21.3927	4.27148	2.81219	2.17002	5.72316	1.2025
1332	30	0	1	3	0	0	0	0	0	0	0	1	3900	0	28.7557	17.7067	17.0319	5.70571	3.63061	3.35521	4.71669	2.06984	1.58183	3.4364	1.6671	1.35513	7.95161	4.63842	4.38267	1.62453	0.995504	0.956861	21.1648	4.23051	2.78945	2.15288	5.65757	1.1923
1333	27	0	1	3	0	0	1	0	0	0	0	1	2900	1	28.2242	17.6285	17.3516	5.61981	3.60404	3.41651	4.58497	2.04988	1.61434	3.34564	1.65278	1.38326	7.84011	4.61057	4.46177	1.60664	0.987125	0.973907	21.0681	4.21345	2.74973	2.12723	5.63748	1.18923
1334	27	0	1	1	0	0	1	0	0	0	0	2	3400	0	28.2242	17.6285	17.589	5.61981	3.60404	3.46179	4.58497	2.04988	1.6411	3.34564	1.65278	1.40074	7.84011	4.61057	4.53495	1.60664	0.987125	0.984249	21.1473	4.22855	2.75865	2.13305	5.66188	1.19267
1335	31	0	3	3	0	0	0	0	0	0	0	1	3250	1	28.2242	17.6285	17.4574	5.61981	3.60404	3.43255	4.58497	2.04988	1.62338	3.34564	1.65278	1.39072	7.84011	4.61057	4.48749	1.60664	0.987125	0.978038	21.1034	4.2188	2.75274	2.12971	5.64606	1.1906
1336	31	0	2	3	0	0	0	0	1	1	0	2	3300	0	28.2242	17.6285	17.1716	5.61981	3.60404	3.40475	4.58497	2.04988	1.61182	3.34564	1.65278	1.37396	7.84011	4.61057	4.41795	1.60664	0.987125	0.968183	21.0081	4.20953	2.74889	2.12413	5.62288	1.18732
1337	29	0	2	2	0	0	0	0	0	0	0	1	3100	1	27.563	17.6692	17.6772	5.51464	3.60186	3.48792	4.44267	2.02684	1.65659	3.26074	1.63886	1.41008	7.6846	4.62164	4.56751	1.5789	0.989811	0.989881	20.9698	4.20147	2.7087	2.10323	5.62458	1.1862
1338	29	0	1	3	0	1	0	1	1	0	0	2	3150	0	27.563	17.6692	17.2983	5.51464	3.60186	3.41636	4.44267	2.02684	1.61607	3.26074	1.63886	1.38035	7.6846	4.62164	4.45901	1.5789	0.989811	0.972044	20.8435	4.17762	2.69519	2.09332	5.58842	1.18025
1339	26	0	1	2	0	0	1	0	0	0	0	2	3300	1	27.4585	17.5907	17.4415	5.50515	3.58319	3.47355	4.39186	2.00948	1.64801	3.23746	1.62278	1.39526	7.67626	4.59673	4.51292	1.58081	0.985249	0.985874	20.8302	4.18729	2.68312	2.08517	5.5953	1.18398
1340	26	0	3	2	0	0	1	0	0	0	0	1	3650	0	27.4585	17.5907	17.5886	5.50515	3.58319	3.46349	4.39186	2.00948	1.6434	3.23746	1.62278	1.40539	7.67626	4.59673	4.52606	1.58081	0.985249	0.984933	20.8793	4.18394	2.68158	2.08854	5.59968	1.18367
1341	28	0	1	3	0	0	1	0	0	0	0	1	3400	1	27.1148	17.528	17.7212	5.45444	3.57257	3.48642	4.26961	1.99665	1.65677	3.16558	1.61443	1.416	7.59035	4.58252	4.55972	1.57179	0.982222	0.990482	20.788	4.17114	2.64101	2.06534	5.57753	1.1815
1342	28	0	3	2	0	0	0	0	0	0	0	2	3350	0	27.1148	17.528	17.6834	5.45444	3.57257	3.53429	4.26961	1.99665	1.68034	3.16558	1.61443	1.41696	7.59035	4.58252	4.58801	1.57179	0.982222	1.0032	20.7754	4.1871	2.64887	2.06566	5.58696	1.18574
1343	29	0	3	1	0	0	0	0	0	0	0	1	2700	1	27.1148	17.528	17.4078	5.45444	3.57257	3.43353	4.26961	1.99665	1.6274	3.16558	1.61443	1.39187	7.59035	4.58252	4.47943	1.57179	0.982222	0.976248	20.6835	4.15351	2.63122	2.0573	5.55077	1.17675
1344	29	0	1	1	0	1	1	1	1	0	0	1	3200	0	27.1148	17.528	17.1639	5.45444	3.57257	3.39688	4.26961	1.99665	1.60667	3.16558	1.61443	1.37165	7.59035	4.58252	4.42502	1.57179	0.982222	0.965631	20.6022	4.1413	2.62431	2.05055	5.53263	1.17322
1345	29	0	3	1	0	1	0	0	0	0	0	1	3420	1	26.7921	17.5114	17.4975	5.40958	3.5686	3.45031	4.18969	1.98174	1.63695	3.11503	1.60409	1.40042	7.50027	4.58555	4.50077	1.55575	0.982972	0.981222	20.6003	4.14283	2.60279	2.03985	5.52887	1.17332
1346	29	0	1	1	0	0	0	0	0	0	0	2	3200	0	26.7921	17.5114	18.1005	5.40958	3.5686	3.56486	4.18969	1.98174	1.69956	3.11503	1.60409	1.44885	7.50027	4.58555	4.66654	1.55575	0.982972	1.01083	20.8013	4.18102	2.62366	2.05599	5.58412	1.18319
1347	31	0	1	3	0	1	0	1	0	0	0	1	3450	1	26.4688	17.6198	17.498	5.36193	3.58824	3.47567	4.12731	1.98814	1.65756	3.07421	1.60986	1.40553	7.40977	4.61493	4.51298	1.53931	0.988845	0.986957	20.5289	4.14195	2.591	2.02987	5.51256	1.1717
1348	31	0	1	1	0	0	0	0	1	0	0	1	3500	0	26.4688	17.6198	18.345	5.36193	3.58824	3.61266	4.12731	1.98814	1.72564	3.07421	1.60986	1.47142	7.40977	4.61493	4.72779	1.53931	0.988845	1.02372	20.8112	4.18761	2.6137	2.05183	5.58416	1.18396
1349	24	0	1	3	0	0	0	0	0	0	0	1	3300	1	25.8345	17.7804	17.8152	5.26846	3.6165	3.58025	4.02021	1.99911	1.72009	2.99958	1.61987	1.45795	7.23702	4.65676	4.64985	1.5029	0.997293	1.02937	20.4767	4.15507	2.57981	2.0258	5.51454	1.17652
1350	24	0	1	2	0	0	0	0	0	0	0	1	2850	0	25.8345	17.7804	17.9217	5.26846	3.6165	3.53086	4.02021	1.99911	1.68393	2.99958	1.61987	1.43901	7.23702	4.65676	4.60886	1.5029	0.997293	1.00319	20.5122	4.13861	2.56775	2.01948	5.50088	1.16779
1351	38	0	3	3	0	0	1	0	0	0	0	2	2900	1	25.8345	17.7804	18.0168	5.26846	3.6165	3.55528	4.02021	1.99911	1.69856	2.99958	1.61987	1.44743	7.23702	4.65676	4.64476	1.5029	0.997293	1.00822	20.5439	4.14675	2.57263	2.02229	5.51285	1.16947
1352	38	0	2	1	0	1	1	0	1	0	0	1	2750	0	25.8345	17.7804	17.8491	5.26846	3.6165	3.57304	4.02021	1.99911	1.70382	2.99958	1.61987	1.43617	7.23702	4.65676	4.62997	1.5029	0.997293	1.01424	20.488	4.15267	2.57438	2.01854	5.50792	1.17148
1353	28	0	1	1	0	0	0	0	0	0	0	2	2920	1	25.7014	17.8641	17.6952	5.2571	3.62926	3.48822	3.98692	1.97378	1.66815	2.9798	1.60163	1.43006	7.18816	4.69503	4.54058	1.49398	1.00504	0.99259	20.4202	4.12486	2.54295	2.00383	5.47459	1.16387
1354	28	0	1	3	0	0	1	0	0	0	0	1	3150	0	25.7014	17.8641	17.3629	5.2571	3.62926	3.45376	3.98692	1.97378	1.65452	2.9798	1.60163	1.40464	7.18816	4.69503	4.47313	1.49398	1.00504	0.981375	20.3095	4.11337	2.53841	1.99536	5.45211	1.16013
1355	29	0	3	3	0	0	0	0	0	0	0	1	2250	1	25.6236	17.6781	17.3814	5.24584	3.59687	3.43974	3.95428	1.90322	1.6445	2.96313	1.55677	1.4099	7.16489	4.66646	4.46662	1.49053	1.00132	0.979651	20.2277	4.09415	2.50066	1.9766	5.43266	1.15717
1356	29	0	3	3	0	0	1	0	0	0	0	1	3300	0	25.6236	17.6781	17.3383	5.24584	3.59687	3.44743	3.95428	1.90322	1.65549	2.96313	1.55677	1.40719	7.16489	4.66646	4.46316	1.49053	1.00132	0.980225	20.2133	4.09671	2.50433	1.9757	5.4315	1.15736
1357	23	0	3	3	0	0	0	0	0	0	0	2	3200	1	24.698	16.9858	17.7907	5.11117	3.43438	3.58473	3.6949	1.75361	1.73204	2.82382	1.45776	1.46402	6.95083	4.47882	4.63725	1.45485	0.965252	1.02468	19.8249	4.04343	2.39352	1.9152	5.35563	1.14826
1358	23	0	1	1	0	0	1	0	0	0	0	2	3250	0	24.698	16.9858	18.4088	5.11117	3.43438	3.75029	3.6949	1.75361	1.84445	2.82382	1.45776	1.57633	6.95083	4.47882	4.85163	1.45485	0.965252	1.08335	20.0309	4.09862	2.43099	1.95264	5.42709	1.16782
1359	37	0	3	3	0	0	1	0	0	0	0	1	3780	1	24.698	16.9858	18.5072	5.11117	3.43438	3.77831	3.6949	1.75361	1.85961	2.82382	1.45776	1.58729	6.95083	4.47882	4.88629	1.45485	0.965252	1.09495	20.0637	4.10796	2.43604	1.95629	5.43865	1.17168
1360	37	0	3	3	0	0	1	0	0	0	0	1	3250	0	24.698	16.9858	17.6611	5.11117	3.43438	3.5326	3.6949	1.75361	1.69645	2.82382	1.45776	1.43629	6.95083	4.47882	4.56588	1.45485	0.965252	1.00261	19.7816	4.02605	2.38166	1.90596	5.33184	1.1409
1361	36	0	3	2	0	1	0	0	0	0	0	1	3960	1	24.3224	16.9844	18.5957	5.02845	3.42774	3.80006	3.65948	1.73823	1.8717	2.80271	1.44423	1.59714	6.82773	4.48199	4.91164	1.42971	0.965851	1.10134	19.9675	4.08542	2.42314	1.94803	5.40712	1.16563
1362	36	0	1	3	0	1	0	0	0	0	0	1	3150	0	24.3224	16.9844	18.3192	5.02845	3.42774	3.72524	3.65948	1.73823	1.82573	2.80271	1.44423	1.55785	6.82773	4.48199	4.8165	1.42971	0.965851	1.07601	19.8753	4.06047	2.40782	1.93493	5.3754	1.15719
1363	30	0	1	3	0	1	0	1	0	0	0	1	3450	1	24.1985	16.866	18.0467	4.99937	3.39937	3.63031	3.66917	1.7039	1.74839	2.80993	1.41797	1.47263	6.78283	4.45478	4.68504	1.41968	0.960467	1.03092	19.7037	4.00969	2.37382	1.90018	5.30755	1.13702
1364	30	0	1	3	0	0	1	0	1	0	0	1	3120	0	24.1985	16.866	18.6895	4.99937	3.39937	3.82166	3.66917	1.7039	1.88393	2.80993	1.41797	1.60761	6.78283	4.45478	4.93725	1.41968	0.960467	1.10778	19.918	4.07347	2.419	1.94517	5.39162	1.16264
1365	26	0	3	3	0	0	1	0	0	0	0	2	3650	0	24.2948	16.5838	18.717	5.01045	3.33941	3.8336	3.69986	1.65172	1.89197	2.83189	1.38172	1.61261	6.80716	4.36839	4.94941	1.42437	0.943673	1.11056	19.8652	4.06115	2.41452	1.94207	5.37499	1.15954
1366	26	0	1	1	0	0	0	0	0	0	0	1	3700	1	24.2948	16.5838	17.9918	5.01045	3.33941	3.63757	3.69986	1.65172	1.76242	2.83189	1.38172	1.48692	6.80716	4.36839	4.6965	1.42437	0.943673	1.03901	19.6235	3.99581	2.37133	1.90018	5.29068	1.13568
1367	31	0	3	2	0	0	1	0	0	0	0	1	2960	1	24.4988	16.3283	18.3027	5.04644	3.29099	3.72831	3.75574	1.57849	1.82414	2.87439	1.33106	1.54636	6.83533	4.30588	4.81775	1.43034	0.931639	1.07851	19.71	4.02191	2.38612	1.91727	5.31965	1.14683
1368	31	0	2	2	0	0	0	0	0	0	0	2	3000	0	24.4988	16.3283	17.5068	5.04644	3.29099	3.50884	3.75574	1.57849	1.68524	2.87439	1.33106	1.43149	6.83533	4.30588	4.52482	1.43034	0.931639	0.996258	19.4447	3.94875	2.33982	1.87898	5.22201	1.11941
1369	25	0	3	3	0	0	0	0	0	0	0	2	3250	1	24.3257	16.0645	17.9906	5.01783	3.22119	3.65457	3.72803	1.54512	1.78511	2.8562	1.30732	1.50821	6.774	4.22383	4.70854	1.41965	0.912796	1.05163	19.4603	3.96453	2.35275	1.89058	5.23546	1.12802
1370	25	0	3	1	0	0	1	0	0	0	0	2	3750	0	24.3257	16.0645	18.1106	5.01783	3.22119	3.68617	3.72803	1.54512	1.80495	2.8562	1.30732	1.52897	6.774	4.22383	4.75327	1.41965	0.912796	1.06732	19.5003	3.97507	2.35937	1.8975	5.25037	1.13326
1371	28	0	3	2	0	0	1	0	1	0	0	1	3400	1	24.3257	16.0645	18.4244	5.01783	3.22119	3.7708	3.72803	1.54512	1.86199	2.8562	1.30732	1.58511	6.774	4.22383	4.85323	1.41965	0.912796	1.08907	19.6049	4.00328	2.37838	1.91621	5.28369	1.14051
1372	28	0	3	2	0	0	0	0	0	0	0	2	2490	0	24.3257	16.0645	18.6131	5.01783	3.22119	3.82013	3.72803	1.54512	1.89436	2.8562	1.30732	1.61497	6.774	4.22383	4.91719	1.41965	0.912796	1.1035	19.6678	4.01972	2.38917	1.92616	5.30501	1.14531
1373	31	0	1	3	0	0	1	0	0	0	0	2	3850	1	24.3257	16.0645	18.6131	5.01783	3.22119	3.82013	3.72803	1.54512	1.89436	2.8562	1.30732	1.61497	6.774	4.22383	4.91719	1.41965	0.912796	1.1035	19.6678	4.01972	2.38917	1.92616	5.30501	1.14531
1374	31	0	3	3	0	0	1	0	1	0	0	1	2850	0	24.3257	16.0645	17.831	5.01783	3.22119	3.59388	3.72803	1.54512	1.74089	2.8562	1.30732	1.46854	6.774	4.22383	4.61653	1.41965	0.912796	1.01877	19.4071	3.9443	2.33801	1.87735	5.20479	1.11707
1375	31	0	1	4	0	0	1	0	0	0	0	1	3400	1	24.3257	16.0645	18.6131	5.01783	3.22119	3.82013	3.72803	1.54512	1.89436	2.8562	1.30732	1.61497	6.774	4.22383	4.91719	1.41965	0.912796	1.1035	19.6678	4.01972	2.38917	1.92616	5.30501	1.14531
1376	31	0	1	2	0	0	0	0	0	0	0	1	2650	0	24.3257	16.0645	18.2797	5.01783	3.22119	3.73112	3.72803	1.54512	1.83329	2.8562	1.30732	1.55399	6.774	4.22383	4.81209	1.41965	0.912796	1.08011	19.5566	3.99005	2.36881	1.90584	5.26998	1.13752
1377	28	0	3	3	0	0	0	0	0	0	0	2	3300	1	24.5472	15.7939	18.4516	5.06913	3.15883	3.80749	3.71882	1.51866	1.90212	2.85418	1.28677	1.62295	6.82956	4.14615	4.90438	1.43276	0.895667	1.11691	19.5976	4.01182	2.37986	1.9213	5.29336	1.14845
1378	28	0	3	1	0	0	0	0	1	0	0	2	2800	0	24.5472	15.7939	18.7661	5.06913	3.15883	3.86631	3.71882	1.51866	1.92799	2.85418	1.28677	1.6439	6.82956	4.14615	4.9707	1.43276	0.895667	1.12511	19.7024	4.03142	2.38849	1.92829	5.31547	1.15118
1379	29	0	1	3	0	0	0	0	0	0	0	2	2650	1	24.5472	15.7939	18.5234	5.06913	3.15883	3.82556	3.71882	1.51866	1.91824	2.85418	1.28677	1.64162	6.82956	4.14615	4.93146	1.43276	0.895667	1.12577	19.6215	4.01784	2.38524	1.92752	5.30239	1.1514
1380	29	0	1	1	0	0	0	0	0	0	0	1	3050	0	24.5472	15.7939	18.5352	5.06913	3.15883	3.8333	3.71882	1.51866	1.92876	2.85418	1.28677	1.65288	6.82956	4.14615	4.93667	1.43276	0.895667	1.12612	19.6255	4.02042	2.38875	1.93128	5.30413	1.15152
1381	26	0	1	2	0	0	0	0	0	0	0	1	3050	1	24.4556	15.6272	19.4252	5.06812	3.11759	3.99867	3.65215	1.49888	2.06005	2.80966	1.27368	1.74483	6.79432	4.09409	5.22688	1.42543	0.884271	1.17276	19.836	4.06146	2.4037	1.94272	5.37176	1.16082
1382	26	0	3	3	0	0	1	0	1	0	0	2	3300	0	24.4556	15.6272	18.3781	5.06812	3.11759	3.76472	3.65215	1.49888	1.86222	2.80966	1.27368	1.57934	6.79432	4.09409	4.84126	1.42543	0.884271	1.09135	19.4869	3.98348	2.33775	1.88756	5.24322	1.13368
1383	30	0	1	3	0	0	1	0	0	0	0	1	3380	1	24.4556	15.6272	18.8291	5.06812	3.11759	3.88633	3.65215	1.49888	1.94074	2.80966	1.27368	1.65349	6.79432	4.09409	4.98759	1.42543	0.884271	1.12791	19.6373	4.02401	2.36392	1.91228	5.292	1.14587
1384	30	0	2	3	0	0	1	0	0	0	0	1	2230	0	24.4556	15.6272	18.8291	5.06812	3.11759	3.88633	3.65215	1.49888	1.94074	2.80966	1.27368	1.65349	6.79432	4.09409	4.98759	1.42543	0.884271	1.12791	19.6373	4.02401	2.36392	1.91228	5.292	1.14587
1385	33	0	2	2	0	0	0	0	0	0	0	2	2920	1	24.4556	15.6272	19.6871	5.06812	3.11759	4.03839	3.65215	1.49888	2.09891	2.80966	1.27368	1.77233	6.79432	4.09409	5.31565	1.42543	0.884271	1.18778	19.9233	4.0747	2.41665	1.95189	5.40135	1.16583
1386	33	0	1	3	0	0	0	0	1	0	0	2	3360	0	24.4556	15.6272	18.5956	5.06812	3.11759	3.85046	3.65215	1.49888	1.9356	2.80966	1.27368	1.65549	6.79432	4.09409	4.95744	1.42543	0.884271	1.13378	19.5595	4.01206	2.36221	1.91294	5.28195	1.14783
1387	30	0	3	2	0	0	0	0	1	0	0	1	3500	1	24.2551	15.6789	18.7417	5.02804	3.12145	3.88829	3.60716	1.49679	1.97995	2.77608	1.27272	1.69748	6.73498	4.10737	5.0044	1.4156	0.885486	1.14025	19.5586	4.01259	2.3613	1.91543	5.28225	1.14711
1388	30	0	3	4	0	0	1	0	1	0	0	2	3350	0	24.2551	15.6789	19.4423	5.02804	3.12145	4.00887	3.60716	1.49679	2.06805	2.77608	1.27272	1.7497	6.73498	4.10737	5.23657	1.4156	0.885486	1.17503	19.7921	4.05279	2.39066	1.93283	5.35964	1.1587
1389	26	0	3	4	0	0	1	0	0	0	0	2	2850	1	24.0652	15.6738	19.3823	4.99161	3.11535	4.00907	3.57712	1.48604	2.05934	2.75966	1.26543	1.74499	6.67346	4.10884	5.20852	1.40464	0.884505	1.173	19.7071	4.03868	2.37416	1.92336	5.33027	1.15405
1390	26	0	3	1	0	0	0	0	0	0	0	2	3590	0	24.0652	15.6738	19.3823	4.99161	3.11535	4.00907	3.57712	1.48604	2.05934	2.75966	1.26543	1.74499	6.67346	4.10884	5.20852	1.40464	0.884505	1.173	19.7071	4.03868	2.37416	1.92336	5.33027	1.15405
1391	33	0	3	3	0	1	1	1	1	0	0	2	2700	1	24.1435	15.5709	18.4196	5.0125	3.0895	3.78073	3.57509	1.46187	1.86963	2.76913	1.24206	1.5812	6.70039	4.07989	4.84448	1.41198	0.877164	1.0952	19.378	3.96091	2.3022	1.86413	5.20825	1.12811
1392	33	0	3	3	0	0	0	0	1	0	0	2	3550	0	24.1435	15.5709	18.8084	5.0125	3.0895	3.91699	3.57509	1.46187	1.98182	2.76913	1.24206	1.69481	6.70039	4.07989	5.02454	1.41198	0.877164	1.15077	19.5076	4.00633	2.3396	1.902	5.26827	1.14664
1393	32	0	3	4	0	0	0	0	0	0	0	1	3250	1	24.221	15.3203	18.8099	5.02887	3.03908	3.87271	3.5783	1.41422	1.92234	2.77205	1.20433	1.62661	6.72613	4.0111	4.96483	1.41693	0.864409	1.12157	19.4504	3.98022	2.30496	1.86766	5.23402	1.1343
1394	32	0	3	1	0	0	0	0	0	0	0	1	2200	0	24.221	15.3203	20.5048	5.02887	3.03908	4.22453	3.5783	1.41422	2.22322	2.77205	1.20433	1.87458	6.72613	4.0111	5.55248	1.41693	0.864409	1.24248	20.0154	4.0975	2.40525	1.95032	5.4299	1.17461
1395	26	0	2	3	0	0	1	0	0	0	0	1	3050	1	24.3458	15.0398	19.0864	5.05376	2.98446	3.96817	3.58509	1.36634	1.99506	2.77552	1.16734	1.69759	6.76619	3.93056	5.09239	1.42535	0.848772	1.16416	19.4907	4.00213	2.3155	1.88015	5.26305	1.14609
1396	26	0	3	2	0	0	1	0	0	0	0	2	2820	0	24.3458	15.0398	19.209	5.05376	2.98446	3.99107	3.58509	1.36634	2.00257	2.77552	1.16734	1.70188	6.76619	3.93056	5.11343	1.42535	0.848772	1.16504	19.5316	4.00976	2.318	1.88158	5.27006	1.14639
1397	28	0	3	3	0	0	1	0	0	0	0	1	3500	1	24.3458	15.0398	20.4824	5.05376	2.98446	4.21357	3.58509	1.36634	2.2174	2.77552	1.16734	1.86667	6.76619	3.93056	5.53434	1.42535	0.848772	1.23978	19.956	4.08393	2.38961	1.93651	5.41036	1.1713
1398	28	0	1	2	0	0	1	0	0	0	0	2	3270	0	24.3458	15.0398	19.0864	5.05376	2.98446	3.96817	3.58509	1.36634	1.99506	2.77552	1.16734	1.69759	6.76619	3.93056	5.09239	1.42535	0.848772	1.16416	19.4907	4.00213	2.3155	1.88015	5.26305	1.14609
1399	30	0	1	2	0	0	0	0	0	0	0	1	4020	1	24.3458	15.0398	19.1565	5.05376	2.98446	3.98581	3.58509	1.36634	2.01144	2.77552	1.16734	1.71695	6.76619	3.93056	5.11949	1.42535	0.848772	1.1732	19.514	4.00801	2.32096	1.8866	5.27208	1.14911
1400	30	0	1	3	0	0	0	0	0	0	0	1	3400	0	24.3458	15.0398	19.209	5.05376	2.98446	3.99107	3.58509	1.36634	2.00257	2.77552	1.16734	1.70188	6.76619	3.93056	5.11343	1.42535	0.848772	1.16504	19.5316	4.00976	2.318	1.88158	5.27006	1.14639
1401	31	0	3	1	0	0	1	0	0	0	1	1	3700	1	24.3458	15.0398	20.2655	5.05376	2.98446	4.17366	3.58509	1.36634	2.17803	2.77552	1.16734	1.83557	6.76619	3.93056	5.48524	1.42535	0.848772	1.22713	19.8837	4.07063	2.37649	1.92614	5.39399	1.16709
1402	31	0	1	3	0	1	0	1	0	0	0	2	3040	0	24.3458	15.0398	19.9951	5.05376	2.98446	4.1332	3.58509	1.36634	2.13783	2.77552	1.16734	1.8072	6.76619	3.93056	5.39329	1.42535	0.848772	1.21169	19.7936	4.05714	2.36309	1.91668	5.36334	1.16194
1403	28	0	2	3	0	0	1	0	0	0	0	2	3370	1	24.4169	14.777	20.0023	5.08593	2.92176	4.14264	3.57932	1.32597	2.13325	2.77682	1.13325	1.80687	6.78766	3.85371	5.38227	1.43049	0.832874	1.21275	19.7321	4.05011	2.34618	1.90564	5.34121	1.1587
1404	28	0	1	1	1	0	1	0	1	0	0	1	3000	0	24.4169	14.777	19.3373	5.08593	2.92176	3.99273	3.57932	1.32597	1.99468	2.77682	1.13325	1.69466	6.78766	3.85371	5.11183	1.43049	0.832874	1.15371	19.5104	4.00014	2.29999	1.86824	5.25107	1.13903
1405	26	0	3	3	0	0	0	0	0	0	0	2	2640	1	24.3562	14.5076	19.4776	5.09561	2.86216	4.04543	3.54385	1.28359	2.03265	2.76402	1.10134	1.72523	6.77776	3.76641	5.19403	1.42792	0.818436	1.18134	19.4471	4.00107	2.2867	1.86353	5.24607	1.14256
1406	26	0	1	3	0	0	0	0	0	0	0	2	4150	0	24.3562	14.5076	20.7432	5.09561	2.86216	4.26555	3.54385	1.28359	2.24828	2.76402	1.10134	1.89058	6.77776	3.76641	5.61349	1.42792	0.818436	1.25555	19.869	4.07444	2.35857	1.91865	5.38589	1.1673
1407	31	1	3	1	0	0	1	0	0	0	0	1	3750	1	24.2103	14.2653	19.5729	5.05934	2.80795	4.06737	3.52523	1.25573	2.04584	2.75104	1.08169	1.73595	6.73179	3.6917	5.22836	1.41675	0.80476	1.19094	19.3495	3.97822	2.2756	1.85623	5.21728	1.13748
1408	31	0	3	1	0	0	1	0	1	0	0	2	2620	0	24.2103	14.2653	19.5924	5.05934	2.80795	4.0762	3.52523	1.25573	2.06079	2.75104	1.08169	1.75628	6.73179	3.6917	5.2489	1.41675	0.80476	1.20046	19.356	3.98116	2.28058	1.863	5.22413	1.14065
1409	26	0	2	4	0	0	1	0	0	0	0	1	3270	1	24.0518	14.0311	22.5005	5.01717	2.755	4.59131	3.50687	1.23264	2.61813	2.73674	1.06573	2.18657	6.68056	3.62262	6.10969	1.40455	0.791175	1.34234	20.1945	4.12116	2.45255	1.99635	5.47096	1.17936
1410	26	0	3	1	0	0	1	0	0	0	0	2	2900	0	24.0518	14.0311	20.5669	5.01717	2.755	4.25165	3.50687	1.23264	2.20532	2.73674	1.06573	1.86008	6.68056	3.62262	5.56427	1.40455	0.791175	1.24706	19.5499	4.00794	2.31494	1.88752	5.28915	1.14759
1411	31	0	3	3	0	0	0	0	0	0	0	1	3100	1	24.0518	14.0311	21.0569	5.01717	2.755	4.33162	3.50687	1.23264	2.28625	2.73674	1.06573	1.92048	6.68056	3.62262	5.70592	1.40455	0.791175	1.27522	19.7133	4.0346	2.34192	1.90765	5.33636	1.15698
1412	31	0	3	1	0	0	1	0	0	0	0	1	3400	0	24.0518	14.0311	19.7292	5.01717	2.755	4.10585	3.50687	1.23264	2.0776	2.73674	1.06573	1.76926	6.68056	3.62262	5.28955	1.40455	0.791175	1.20934	19.2707	3.95934	2.27237	1.85724	5.19758	1.13502
1413	24	0	3	2	0	0	0	0	0	0	0	2	3350	0	23.9371	14.1205	20.2493	4.98369	2.75892	4.22107	3.48382	1.23676	2.18107	2.71749	1.07303	1.84937	6.64124	3.63143	5.46264	1.39538	0.793953	1.23528	19.4356	3.98789	2.30055	1.87996	5.2451	1.14154
1414	24	0	1	3	0	0	1	0	0	0	0	1	3600	1	23.9371	14.1205	20.9677	4.98369	2.75892	4.33289	3.48382	1.23676	2.27927	2.71749	1.07303	1.91357	6.64124	3.63143	5.70831	1.39538	0.793953	1.27529	19.6751	4.02517	2.33328	1.90136	5.32699	1.15488
1415	28	1	1	1	0	0	1	0	0	0	0	1	3200	1	24.0759	14.0713	19.7969	5.00955	2.74621	4.13987	3.48797	1.22979	2.10212	2.71849	1.06869	1.78224	6.68213	3.61628	5.31328	1.40295	0.790652	1.21657	19.3147	3.96521	2.2733	1.85648	5.2039	1.13672
1416	28	0	3	2	0	0	0	0	0	0	0	1	2450	0	24.0759	14.0713	20.5771	5.00955	2.74621	4.28275	3.48797	1.22979	2.22586	2.71849	1.06869	1.87941	6.68213	3.61628	5.56623	1.40295	0.790652	1.25521	19.5747	4.01284	2.31454	1.88887	5.28821	1.14961
1417	23	0	3	3	0	0	1	0	0	0	0	1	2820	1	24.1856	13.999	22.9893	5.03109	2.72756	4.69102	3.48381	1.22271	2.74031	2.71509	1.06406	2.28456	6.71564	3.59298	6.26768	1.4101	0.786376	1.37751	20.3913	4.14989	2.48228	2.02124	5.52543	1.19133
1418	23	0	3	1	0	0	1	0	0	0	0	2	3220	0	24.1856	13.999	20.4028	5.03109	2.72756	4.26452	3.48381	1.22271	2.21082	2.71509	1.06406	1.87372	6.71564	3.59298	5.50943	1.4101	0.786376	1.24782	19.5292	4.00772	2.30578	1.88429	5.27268	1.1481
1419	27	0	1	3	0	0	0	0	0	0	0	2	3090	1	24.1457	13.9388	21.7117	5.02435	2.71375	4.50126	3.45153	1.21681	2.39878	2.6909	1.06046	2.01246	6.70542	3.57512	5.92503	1.40903	0.782844	1.32497	19.932	4.07979	2.35571	1.92127	5.40186	1.17228
1420	27	0	1	1	0	0	0	0	0	0	0	2	3200	0	24.1457	13.9388	22.5717	5.02435	2.71375	4.66497	3.45153	1.21681	2.60866	2.6909	1.06046	2.18452	6.70542	3.57512	6.13845	1.40903	0.782844	1.35834	20.2187	4.13436	2.42566	1.97862	5.473	1.18341
1421	25	0	3	3	0	0	0	0	0	0	0	2	3300	1	23.8629	13.8794	22.4253	4.99314	2.69527	4.65888	3.34517	1.20949	2.55115	2.62389	1.0571	2.1392	6.61633	3.55481	6.11536	1.39702	0.777823	1.3593	20.0559	4.11576	2.36861	1.94007	5.42883	1.17805
1422	25	0	1	3	0	1	0	1	0	0	0	2	3800	0	23.8629	13.8794	20.6295	4.99314	2.69527	4.32866	3.34517	1.20949	2.2445	2.62389	1.0571	1.90643	6.61633	3.55481	5.5735	1.39702	0.777823	1.26762	19.4573	4.00569	2.26639	1.86247	5.24821	1.14749
1423	33	0	3	3	0	0	1	0	0	0	0	1	3250	1	23.8629	13.8794	23.3222	4.99314	2.69527	4.78866	3.34517	1.20949	2.76494	2.62389	1.0571	2.30086	6.61633	3.55481	6.36787	1.39702	0.777823	1.39935	20.3548	4.15902	2.43987	1.99395	5.513	1.1914
1424	33	0	1	3	0	1	0	1	0	1	0	1	3060	0	23.8629	13.8794	20.4177	4.99314	2.69527	4.29849	3.34517	1.20949	2.20688	2.62389	1.0571	1.87418	6.61633	3.55481	5.51396	1.39702	0.777823	1.26338	19.3867	3.99563	2.25385	1.85172	5.22837	1.14607
1425	32	0	3	1	0	0	1	0	0	0	0	1	3100	1	23.3757	13.8861	22.7895	4.90519	2.68614	4.74591	3.22826	1.20733	2.63829	2.53717	1.0584	2.20642	6.45739	3.54561	6.22389	1.36614	0.777133	1.3794	20.0171	4.11241	2.35796	1.934	5.40896	1.17422
1426	32	0	1	1	0	1	0	0	0	1	0	2	2900	0	23.3757	13.8861	22.4101	4.90519	2.68614	4.67762	3.22826	1.20733	2.50939	2.53717	1.0584	2.09524	6.45739	3.54561	6.1568	1.36614	0.777133	1.3723	19.8907	4.08965	2.31499	1.89694	5.3866	1.17186
1427	27	0	1	1	0	0	1	0	0	0	0	1	3260	1	23.3496	13.7902	24.1009	4.89999	2.65226	4.9217	3.20955	1.18481	2.92871	2.53177	1.03988	2.42533	6.44348	3.50318	6.62906	1.36341	0.769468	1.44305	20.4135	4.15798	2.44102	1.99899	5.52524	1.19197
1428	27	0	3	2	0	0	0	0	0	1	0	1	3100	0	23.3496	13.7902	21.9066	4.89999	2.65226	4.58805	3.20955	1.18481	2.43676	2.53177	1.03988	2.03286	6.44348	3.50318	6.02371	1.36341	0.769468	1.34611	19.6821	4.04677	2.27704	1.86817	5.32346	1.15966
1429	24	1	3	1	0	0	1	0	0	0	0	2	3150	1	23.5588	13.5056	24.6824	4.96039	2.57853	5.02572	3.21322	1.14117	3.0001	2.54711	1.00535	2.47027	6.50136	3.40877	6.79761	1.38129	0.747725	1.46855	20.5823	4.18821	2.4515	2.00757	5.56925	1.19919
1430	24	0	3	3	0	0	1	0	0	0	0	1	2470	0	23.5588	13.5056	22.9411	4.96039	2.57853	4.81195	3.21322	1.14117	2.59678	2.54711	1.00535	2.16306	6.50136	3.40877	6.33152	1.38129	0.747725	1.41091	20.0018	4.11696	2.31706	1.90517	5.41389	1.17997
1431	29	0	3	3	0	0	0	0	0	0	0	2	3440	1	23.5588	13.5056	23.8264	4.96039	2.57853	4.95718	3.21322	1.14117	2.82533	2.54711	1.00535	2.3484	6.50136	3.40877	6.54111	1.38129	0.747725	1.44035	20.2969	4.16537	2.39324	1.96695	5.48375	1.18979
1432	29	0	1	3	0	0	0	0	0	0	0	1	2930	0	23.5588	13.5056	24.467	4.96039	2.57853	4.99862	3.21322	1.14117	2.98834	2.54711	1.00535	2.46982	6.50136	3.40877	6.74479	1.38129	0.747725	1.46393	20.5104	4.17918	2.44758	2.00742	5.55164	1.19765
1433	31	0	3	2	0	0	0	0	0	0	0	2	2750	1	23.5588	13.5056	22.4965	4.96039	2.57853	4.70695	3.21322	1.14117	2.53295	2.54711	1.00535	2.1083	6.50136	3.40877	6.18493	1.38129	0.747725	1.38305	19.8536	4.08196	2.29578	1.88692	5.36502	1.17069
1434	31	0	3	4	0	0	0	0	0	0	0	1	3520	0	23.5588	13.5056	23.1288	4.96039	2.57853	4.84626	3.21322	1.14117	2.67683	2.54711	1.00535	2.23506	6.50136	3.40877	6.35432	1.38129	0.747725	1.41102	20.0644	4.12839	2.34374	1.92917	5.42148	1.18001
1435	30	0	3	3	0	0	1	0	0	0	1	1	2950	0	23.5783	13.6315	23.7651	4.95992	2.60531	4.94767	3.19772	1.1592	2.82247	2.53511	1.01662	2.35	6.50616	3.4423	6.52751	1.38302	0.755	1.43826	20.325	4.17097	2.39313	1.96725	5.49199	1.19209
1436	30	0	1	1	0	1	0	1	1	0	0	2	3880	1	23.5783	13.6315	24.4186	4.95992	2.60531	4.99041	3.19772	1.1592	2.98768	2.53511	1.01662	2.47274	6.50616	3.4423	6.7348	1.38302	0.755	1.4623	20.5428	4.18521	2.4482	2.00816	5.56109	1.20011
1437	32	0	3	1	0	0	1	0	0	0	0	1	3230	1	23.5783	13.6315	24.1545	4.95992	2.60531	4.97385	3.19772	1.1592	2.94975	2.53511	1.01662	2.44907	6.50616	3.4423	6.64878	1.38302	0.755	1.45818	20.4548	4.17969	2.43556	2.00027	5.53242	1.19873
1438	32	0	3	3	0	0	1	0	0	0	0	2	3430	0	23.5783	13.6315	23.0555	4.95992	2.60531	4.83484	3.19772	1.1592	2.67182	2.53511	1.01662	2.23517	6.50616	3.4423	6.3376	1.38302	0.755	1.40844	20.0884	4.13335	2.34291	1.92897	5.42869	1.18215
1439	30	0	1	3	0	1	0	1	0	0	0	2	2920	1	23.5247	13.8372	24.3188	4.94302	2.65541	4.96703	3.13516	1.17414	2.99927	2.48539	1.02886	2.4849	6.50295	3.49598	6.71536	1.38327	0.767602	1.45855	20.5602	4.18848	2.43619	1.99972	5.57143	1.20314
1440	30	0	1	4	0	0	0	0	0	0	0	2	3840	0	23.5247	13.8372	23.8942	4.94302	2.65541	4.94314	3.13516	1.17414	2.91176	2.48539	1.02886	2.42006	6.50295	3.49598	6.58034	1.38327	0.767602	1.44573	20.4187	4.18052	2.40702	1.9781	5.52642	1.19887
1441	30	0	1	1	0	0	0	0	0	0	0	1	2900	1	23.2026	13.7719	25.2463	4.89603	2.63001	5.08049	3.05171	1.15771	3.0499	2.43773	1.01827	2.50187	6.41909	3.47087	6.95106	1.36975	0.760193	1.4896	20.7403	4.20218	2.41978	1.98596	5.61367	1.20651
1442	30	0	1	3	0	1	1	1	1	0	0	2	3050	0	23.2026	13.7719	25.2324	4.89603	2.63001	5.09454	3.05171	1.15771	3.05731	2.43773	1.01827	2.51256	6.41909	3.47087	6.95685	1.36975	0.760193	1.49345	20.7356	4.20686	2.42225	1.98952	5.6156	1.2078
1443	28	0	1	2	0	0	1	0	0	0	0	2	3430	1	23.1224	13.9513	25.2856	4.88237	2.66535	5.07922	3.03821	1.17683	3.06227	2.42383	1.03408	2.51376	6.4041	3.51681	6.96043	1.36486	0.76764	1.4919	20.7865	4.20898	2.42577	1.99056	5.62711	1.20813
1444	28	0	1	2	0	0	1	0	0	1	0	2	2850	0	23.1224	13.9513	25.3315	4.88237	2.66535	5.09325	3.03821	1.17683	3.06414	2.42383	1.03408	2.52032	6.4041	3.51681	6.97613	1.36486	0.76764	1.49595	20.8017	4.21366	2.42639	1.99274	5.63235	1.20948
1445	27	0	3	2	0	0	1	0	0	0	0	2	2270	1	23.1954	14.1842	24.6575	4.89591	2.70311	5.01869	3.04614	1.2207	3.02364	2.4274	1.06518	2.49984	6.42129	3.58084	6.80864	1.36489	0.78121	1.47203	20.679	4.2059	2.43016	1.99747	5.60359	1.20604
1446	27	0	1	3	0	0	0	0	0	0	0	2	3000	0	23.1954	14.1842	24.2825	4.89591	2.70311	4.96853	3.04614	1.2207	3.00973	2.4274	1.06518	2.50391	6.42129	3.58084	6.71142	1.36489	0.78121	1.46227	20.554	4.18918	2.42552	1.99883	5.57118	1.20279
1447	33	0	1	3	0	0	0	0	0	1	0	2	2700	1	23.3896	14.3621	24.8566	4.93802	2.74398	5.00587	3.0597	1.24457	3.00503	2.43836	1.08542	2.48065	6.48153	3.63191	6.84512	1.37786	0.791534	1.47177	20.8694	4.22929	2.43643	2.00148	5.65285	1.21372
1448	33	0	3	3	0	0	0	0	0	0	0	2	3250	0	23.3896	14.3621	24.7227	4.93802	2.74398	4.94958	3.0597	1.24457	3.03275	2.43836	1.08542	2.47589	6.48153	3.63191	6.78718	1.37786	0.791534	1.44838	20.8248	4.21053	2.44567	1.99989	5.63354	1.20593
1449	28	0	3	1	0	0	1	0	0	0	0	2	2800	0	23.4519	14.5044	24.8126	4.96723	2.77809	4.95038	3.02396	1.26871	3.02384	2.41523	1.10536	2.47259	6.49847	3.67596	6.82252	1.38351	0.800295	1.45804	20.923	4.2319	2.43884	1.99773	5.66565	1.21395
1450	28	0	1	3	0	0	0	0	1	0	0	2	3510	1	23.4519	14.5044	24.1439	4.96723	2.77809	4.90941	3.02396	1.26871	2.99249	2.41523	1.10536	2.48914	6.49847	3.67596	6.65168	1.38351	0.800295	1.4489	20.7001	4.21824	2.42839	2.00324	5.6087	1.2109
1451	23	0	1	1	0	0	0	0	0	0	0	2	3760	1	23.0978	14.9909	24.0735	4.93965	2.88892	4.82324	2.93542	1.33244	2.9087	2.34984	1.15621	2.40766	6.36904	3.81655	6.61406	1.35555	0.828985	1.4294	20.7207	4.21727	2.39218	1.97123	5.59988	1.20464
1452	23	0	3	3	0	0	0	0	0	0	0	1	3030	0	23.0978	14.9909	23.8574	4.93965	2.88892	4.80482	2.93542	1.33244	2.92271	2.34984	1.15621	2.41865	6.36904	3.81655	6.56625	1.35555	0.828985	1.42549	20.6487	4.21113	2.39686	1.9749	5.58395	1.20334
1453	26	0	1	3	0	0	0	0	0	0	0	1	3420	1	23.0978	14.9909	23.0225	4.93965	2.88892	4.70045	2.93542	1.33244	2.85084	2.34984	1.15621	2.38633	6.36904	3.81655	6.32519	1.35555	0.828985	1.40378	20.3704	4.17634	2.3729	1.96413	5.50359	1.1961
1454	26	0	1	3	0	0	0	0	0	0	0	1	3190	0	23.0978	14.9909	24.2227	4.93965	2.88892	4.81518	2.93542	1.33244	2.92104	2.34984	1.15621	2.39603	6.36904	3.81655	6.65269	1.35555	0.828985	1.42543	20.7705	4.21458	2.3963	1.96736	5.61276	1.20332
1455	25	0	3	4	0	0	1	0	0	0	0	2	3580	1	22.7467	15.2388	24.1526	4.87788	2.94404	4.80348	2.85888	1.36408	2.92252	2.28453	1.18428	2.41195	6.23156	3.8797	6.64051	1.33122	0.842783	1.4298	20.7127	4.20847	2.38183	1.96025	5.58392	1.20127
1456	25	0	3	1	0	1	0	1	0	0	0	2	2830	0	22.7467	15.2388	23.5237	4.87788	2.94404	4.72713	2.85888	1.36408	2.90959	2.28453	1.18428	2.41307	6.23156	3.8797	6.47683	1.33122	0.842783	1.4091	20.5031	4.18302	2.37752	1.96063	5.52937	1.19437
1457	26	0	1	2	0	0	1	0	0	0	0	1	2750	1	22.7467	15.2388	24.2325	4.87788	2.94404	4.80689	2.85888	1.36408	2.9178	2.28453	1.18428	2.40827	6.23156	3.8797	6.6553	1.33122	0.842783	1.43072	20.7393	4.2096	2.38025	1.95902	5.58885	1.20158
1458	26	0	1	3	0	0	1	0	0	0	0	2	2780	0	22.7467	15.2388	23.6697	4.87788	2.94404	4.68804	2.85888	1.36408	2.96965	2.28453	1.18428	2.40422	6.23156	3.8797	6.45174	1.33122	0.842783	1.37372	20.5517	4.16999	2.39754	1.95768	5.521	1.18258
1459	32	0	1	3	0	1	0	0	0	0	0	1	3150	1	22.7467	15.2388	22.7949	4.87788	2.94404	4.63681	2.85888	1.36408	2.83758	2.28453	1.18428	2.37628	6.23156	3.8797	6.26749	1.33122	0.842783	1.39108	20.2601	4.15291	2.35352	1.94836	5.45958	1.18836
1460	32	0	3	1	0	0	1	0	0	0	0	2	2950	0	22.7467	15.2388	24.0684	4.87788	2.94404	4.76018	2.85888	1.36408	2.95921	2.28453	1.18428	2.41264	6.23156	3.8797	6.59564	1.33122	0.842783	1.40826	20.6846	4.19403	2.39406	1.96048	5.56897	1.19409
1461	28	0	3	3	0	0	1	0	0	0	0	2	3060	1	22.2146	15.4055	24.2996	4.75177	2.97937	4.79972	2.77371	1.3815	3.00739	2.22161	1.19926	2.4448	6.0324	3.92181	6.68289	1.29794	0.854062	1.41979	20.6399	4.17695	2.38753	1.95523	5.5457	1.1906
1462	28	0	1	3	0	0	0	0	0	0	0	1	3450	0	22.2146	15.4055	23.4593	4.75177	2.97937	4.72459	2.77371	1.3815	2.95023	2.22161	1.19926	2.45461	6.0324	3.92181	6.49467	1.29794	0.854062	1.41771	20.3598	4.15191	2.36848	1.95849	5.48296	1.18991
1463	27	0	3	3	0	0	0	0	0	0	0	2	3320	0	21.2816	15.9511	24.0494	4.52394	3.08437	4.73812	2.65011	1.44366	3.25861	2.12429	1.24678	2.56157	5.71423	4.07099	6.54924	1.23963	0.883234	1.36429	20.4274	4.11548	2.45079	1.97755	5.44482	1.16238
1464	27	0	1	2	0	0	1	0	0	0	0	1	3150	1	21.2816	15.9511	24.3291	4.52394	3.08437	4.88324	2.65011	1.44366	3.06053	2.12429	1.24678	2.51873	5.71423	4.07099	6.77931	1.23963	0.883234	1.45835	20.5206	4.16385	2.38477	1.96327	5.52151	1.19374
1465	30	0	1	1	0	0	0	0	0	0	0	1	3150	1	20.9951	15.9663	24.8405	4.44904	3.0851	4.92166	2.58545	1.44466	3.21283	2.07762	1.24808	2.57883	5.62508	4.07275	6.85514	1.22258	0.884371	1.44267	20.6006	4.15193	2.41431	1.96818	5.51766	1.18321
1466	30	0	1	3	0	0	0	0	0	0	0	2	3050	0	20.9951	15.9663	24.5896	4.44904	3.0851	4.87292	2.58545	1.44466	3.27078	2.07762	1.24808	2.60006	5.62508	4.07275	6.73356	1.22258	0.884371	1.40986	20.517	4.13569	2.43363	1.97526	5.47713	1.17227
1467	31	0	1	1	0	0	1	0	1	0	0	1	2600	1	20.9951	15.9663	25.8796	4.44904	3.0851	4.99887	2.58545	1.44466	3.92345	2.07762	1.24808	2.95503	5.62508	4.07275	6.94391	1.22258	0.884371	1.41284	20.947	4.17767	2.65119	2.09358	5.54725	1.17326
1468	31	0	1	2	0	0	0	0	0	0	0	2	3200	0	20.9951	15.9663	25.6161	4.44904	3.0851	5.07888	2.58545	1.44466	3.18032	2.07762	1.24808	2.59822	5.62508	4.07275	7.13322	1.22258	0.884371	1.5152	20.8592	4.20434	2.40347	1.97464	5.61035	1.20738
1469	25	0	3	3	0	0	0	0	0	0	0	2	3190	1	20.8308	15.8878	24.9699	4.41154	3.07339	4.95065	2.57081	1.4378	3.29415	2.06465	1.24288	2.62881	5.58274	4.05255	6.84997	1.21195	0.880573	1.43662	20.5628	4.14519	2.43425	1.97878	5.49509	1.17638
1470	25	0	3	1	0	0	1	0	0	0	0	1	3400	0	20.8308	15.8878	25.8554	4.41154	3.07339	5.01577	2.57081	1.4378	3.81137	2.06465	1.24288	2.89012	5.58274	4.05255	6.99502	1.21195	0.880573	1.43004	20.858	4.1669	2.60666	2.06588	5.54344	1.17419
1471	27	0	3	1	0	0	1	0	0	0	0	1	3050	1	20.7	15.9429	26.5319	4.37948	3.08219	5.1272	2.55731	1.44144	4.03336	2.05241	1.24627	3.03627	5.55015	4.06631	7.12796	1.20331	0.883565	1.44878	21.0582	4.19629	2.67737	2.11165	5.58147	1.17855
1472	27	0	3	2	0	0	1	0	0	0	0	2	3350	0	20.7	15.9429	26.5319	4.37948	3.08219	5.1272	2.55731	1.44144	4.03336	2.05241	1.24627	3.03627	5.55015	4.06631	7.12796	1.20331	0.883565	1.44878	21.0582	4.19629	2.67737	2.11165	5.58147	1.17855
1473	29	0	1	3	0	1	0	0	0	0	0	2	2950	1	20.7	15.9429	25.1461	4.37948	3.08219	4.98303	2.55731	1.44144	3.28979	2.05241	1.24627	2.62886	5.55015	4.06631	6.93353	1.20331	0.883565	1.45491	20.5963	4.14824	2.42951	1.97585	5.51666	1.1806
1474	29	0	1	1	0	0	0	0	0	0	0	1	3290	0	20.7	15.9429	26.2674	4.37948	3.08219	5.0747	2.55731	1.44144	3.99759	2.05241	1.24627	3.00763	5.55015	4.06631	7.05442	1.20331	0.883565	1.4334	20.9701	4.17879	2.66545	2.1021	5.55696	1.17342
1475	25	1	3	3	0	0	1	0	0	0	0	2	3050	1	20.5693	16.0105	26.3917	4.3466	3.0946	5.1003	2.53946	1.44736	4.02931	2.03776	1.25208	3.02809	5.50451	4.08223	7.09475	1.19089	0.887589	1.43966	20.9905	4.1805	2.67204	2.10598	5.5605	1.17271
1476	25	0	3	2	0	0	0	0	0	0	0	1	3160	0	20.5693	16.0105	25.5415	4.3466	3.0946	4.99881	2.53946	1.44736	3.62087	2.03776	1.25208	2.80181	5.50451	4.08223	6.98204	1.19089	0.887589	1.4374	20.7071	4.14667	2.5359	2.03055	5.52293	1.17196
1477	28	0	1	1	0	0	0	0	0	0	0	1	2570	1	20.5693	16.0105	25.279	4.3466	3.0946	5.0124	2.53946	1.44736	3.31779	2.03776	1.25208	2.64802	5.50451	4.08223	6.98011	1.19089	0.887589	1.46271	20.6196	4.1512	2.43487	1.97929	5.52228	1.18039
1478	28	0	1	1	0	0	1	0	0	0	0	2	3150	0	20.5693	16.0105	26.5246	4.3466	3.0946	5.14068	2.53946	1.44736	4.00724	2.03776	1.25208	3.02887	5.50451	4.08223	7.14707	1.19089	0.887589	1.45377	21.0348	4.19396	2.66469	2.10624	5.57794	1.17742
1479	30	0	1	3	0	0	0	0	0	0	0	2	3720	1	20.1081	16.1516	26.486	4.22584	3.1365	5.09839	2.44933	1.46638	4.14687	1.962	1.26714	3.08217	5.36776	4.12437	7.10021	1.16113	0.899134	1.43079	20.9152	4.15358	2.68753	2.10377	5.53078	1.16369
1480	30	0	1	3	0	0	1	0	0	0	0	1	3050	0	20.1081	16.1516	26.0421	4.22584	3.1365	5.0895	2.44933	1.46638	3.71777	1.962	1.26714	2.87081	5.36776	4.12437	7.12937	1.16113	0.899134	1.46284	20.7673	4.15061	2.54449	2.03331	5.5405	1.17437
1481	31	0	1	1	0	0	1	0	1	0	0	1	2980	1	19.9301	16.121	26.6693	4.17696	3.13604	5.1192	2.42816	1.46601	4.21132	1.94684	1.26533	3.12034	5.31592	4.12038	7.15346	1.1471	0.898543	1.43582	20.9068	4.14407	2.70183	2.11084	5.52992	1.16049
1482	31	0	1	1	0	0	0	0	0	0	0	1	3400	0	19.9301	16.121	26.2498	4.17696	3.13604	5.19747	2.42816	1.46601	3.44543	1.94684	1.26533	2.75444	5.31592	4.12038	7.27815	1.1471	0.898543	1.52257	20.7669	4.17016	2.44653	1.98887	5.57148	1.1894
1483	26	0	3	3	0	0	1	0	0	0	0	1	3200	1	19.8295	16.1758	27.0422	4.14687	3.15672	5.2308	2.4006	1.47563	4.05514	1.9227	1.27207	3.06062	5.28241	4.14079	7.33606	1.13967	0.904169	1.4892	21.0158	4.17813	2.64379	2.08513	5.58642	1.17768
1484	26	1	3	4	0	1	1	1	0	0	0	1	2830	0	19.8295	16.1758	26.4456	4.14687	3.15672	5.1573	2.4006	1.47563	3.78864	1.9227	1.27207	2.92503	5.28241	4.14079	7.2362	1.13967	0.904169	1.48293	20.8169	4.15363	2.55496	2.03994	5.55313	1.17559
1485	34	0	3	3	0	0	1	0	0	0	0	1	3050	1	19.6188	16.1274	27.3696	4.09901	3.15084	5.26602	2.35233	1.47309	4.25156	1.88248	1.26875	3.17787	5.22093	4.1308	7.35205	1.12749	0.90212	1.4829	21.0386	4.17196	2.69233	2.1097	5.56792	1.17084
1486	34	0	1	3	0	0	0	0	0	1	0	2	2840	0	19.6188	16.1274	27.4424	4.09901	3.15084	5.30249	2.35233	1.47309	4.14405	1.88248	1.26875	3.12606	5.22093	4.1308	7.42793	1.12749	0.90212	1.50666	21.0629	4.18411	2.65649	2.09243	5.59322	1.17876
1487	28	0	1	3	0	0	1	0	0	0	0	1	2620	1	19.1519	16.2161	27.5413	3.9903	3.18197	5.32662	2.27753	1.48712	4.11224	1.81927	1.27768	3.12385	5.0763	4.16048	7.49154	1.09572	0.910849	1.52073	20.9698	4.1663	2.62563	2.0736	5.57611	1.17577
1488	28	0	1	2	0	0	0	0	0	0	0	1	3680	0	19.1519	16.2161	28.3961	3.9903	3.18197	5.4605	2.27753	1.48712	4.39048	1.81927	1.27768	3.29951	5.0763	4.16048	7.64409	1.09572	0.910849	1.54226	21.2547	4.21092	2.71838	2.13215	5.62696	1.18294
1489	31	0	1	2	0	0	1	0	0	0	0	2	3640	0	18.9672	16.4128	27.3315	3.94788	3.22523	5.29151	2.24355	1.51622	4.03337	1.79188	1.30111	3.08541	5.02894	4.20132	7.48059	1.08458	0.921855	1.51933	20.9038	4.15487	2.59771	2.05947	5.57028	1.17526
1490	31	0	1	2	0	0	0	0	0	1	0	2	3230	1	18.9672	16.4128	27.7168	3.94788	3.22523	5.23058	2.24355	1.51622	4.54978	1.79188	1.30111	3.33747	5.02894	4.20132	7.47365	1.08458	0.921855	1.47409	21.0323	4.13456	2.76985	2.14349	5.56797	1.16017
1491	28	0	1	2	0	0	0	0	0	0	0	2	3000	0	18.8224	16.4258	27.7193	3.91668	3.22395	5.30842	2.22459	1.51816	4.37726	1.77833	1.30182	3.25817	4.98752	4.20587	7.45	1.07568	0.921307	1.49382	20.9892	4.14968	2.70667	2.11277	5.5478	1.1636
1492	28	0	1	3	0	0	1	0	0	0	0	2	3300	1	18.8224	16.4258	26.8883	3.91668	3.22395	5.27323	2.22459	1.51816	3.78606	1.77833	1.30182	2.95521	4.98752	4.20587	7.39343	1.07568	0.921307	1.51757	20.7122	4.13795	2.5096	2.01179	5.52894	1.17152
1493	32	0	1	1	0	0	0	0	0	0	0	1	2600	1	17.9984	17.0866	28.481	3.71795	3.39003	5.2964	2.11134	1.60297	4.86132	1.69523	1.35992	3.53997	4.74117	4.4149	7.64508	1.02083	0.967697	1.49357	21.1887	4.13479	2.85854	2.19837	5.60038	1.1607
1494	32	0	1	2	0	0	1	0	0	1	0	1	3250	0	17.9984	17.0866	29.3509	3.71795	3.39003	5.44791	2.11134	1.60297	5.03239	1.69523	1.35992	3.65764	4.74117	4.4149	7.86077	1.02083	0.967697	1.53543	21.4786	4.18529	2.91557	2.2376	5.67228	1.17465
1495	26	0	1	3	0	0	1	0	0	1	0	1	3100	1	17.9192	17.0956	29.4236	3.69265	3.40167	5.45752	2.09758	1.61289	5.09131	1.68576	1.36839	3.6868	4.71021	4.42677	7.87513	1.01133	0.971284	1.53113	21.4795	4.18394	2.93393	2.24698	5.6707	1.17125
1496	26	0	3	2	0	0	1	0	0	0	0	2	3200	0	17.9192	17.0956	28.2328	3.69265	3.40167	5.28757	2.09758	1.61289	4.73751	1.68576	1.36839	3.46545	4.71021	4.42677	7.57284	1.01133	0.971284	1.48048	21.0825	4.12729	2.81599	2.1732	5.56994	1.15436
1497	29	0	1	1	0	1	0	0	0	0	0	1	3220	0	17.8237	17.1644	29.6204	3.66775	3.42251	5.48172	2.08749	1.62729	5.10094	1.67942	1.38166	3.69609	4.6804	4.45673	7.91907	1.00451	0.980869	1.53832	21.5362	4.19066	2.93857	2.25239	5.6854	1.17457
1498	29	0	1	3	0	1	0	0	0	0	0	2	3460	1	17.8237	17.1644	29.6578	3.66775	3.42251	5.50131	2.08749	1.62729	5.12597	1.67942	1.38166	3.70858	4.6804	4.45673	7.93184	1.00451	0.980869	1.53835	21.5487	4.19719	2.94692	2.25655	5.68966	1.17458
1499	35	0	1	3	0	1	1	0	0	0	0	2	3550	1	17.8237	17.1644	28.0661	3.66775	3.42251	5.29725	2.08749	1.62729	4.60118	1.67942	1.38166	3.38718	4.6804	4.45673	7.49495	1.00451	0.980869	1.47734	21.0181	4.12917	2.77199	2.14942	5.54403	1.15424
1500	35	0	3	1	0	1	0	1	1	0	0	2	3350	0	17.8237	17.1644	28.5015	3.66775	3.42251	5.30223	2.08749	1.62729	4.82595	1.67942	1.38166	3.51681	4.6804	4.45673	7.64615	1.00451	0.980869	1.48786	21.1632	4.13083	2.84691	2.19263	5.59443	1.15775
1501	36	0	3	2	0	1	1	1	1	0	0	1	2840	1	17.7467	17.2492	29.9439	3.64718	3.44564	5.54999	2.07973	1.64307	5.16885	1.67404	1.39722	3.73881	4.65562	4.4913	8.00136	0.999147	0.99288	1.54684	21.6466	4.21427	2.96388	2.27002	5.71609	1.17962
1502	36	0	3	3	0	1	1	0	1	0	0	1	3000	0	17.7467	17.2492	29.2173	3.64718	3.44564	5.40989	2.07973	1.64307	5.03889	1.67404	1.39722	3.65264	4.65562	4.4913	7.81265	0.999147	0.99288	1.5102	21.4044	4.16757	2.92057	2.2413	5.65319	1.16741
1503	26	0	1	4	0	0	1	0	0	0	0	1	3200	1	17.6692	18.1248	30.4352	3.60186	3.67782	5.3551	2.02684	1.78504	5.29988	1.63886	1.52338	3.76905	4.62164	4.77803	7.95177	0.989811	1.06312	1.50564	22.0764	4.21159	3.03726	2.31043	5.78381	1.18619
1504	26	0	3	3	0	1	0	0	0	0	0	1	3140	0	17.6692	18.1248	29.7152	3.60186	3.67782	5.42228	2.02684	1.78504	5.25207	1.63886	1.52338	3.7463	4.62164	4.77803	7.89722	0.989811	1.06312	1.49811	21.8364	4.23399	3.02132	2.30284	5.76563	1.18368
1505	24	0	3	2	0	1	0	0	0	0	0	2	3420	1	17.5907	18.2368	30.5278	3.58319	3.70392	5.27855	2.00948	1.80212	5.36893	1.62278	1.53741	3.78445	4.59673	4.8104	7.88515	0.985249	1.07178	1.47077	22.1184	4.18855	3.06018	2.31488	5.76409	1.17593
1506	24	0	3	3	0	1	0	0	0	0	0	2	3850	0	17.5907	18.2368	29.7827	3.58319	3.70392	5.40702	2.00948	1.80212	5.30125	1.62278	1.53741	3.76791	4.59673	4.8104	7.91307	0.985249	1.07178	1.4942	21.8701	4.23137	3.03762	2.30937	5.7734	1.18374
1507	28	0	1	3	0	0	1	0	0	0	0	1	3170	1	17.6198	18.2882	30.0185	3.58824	3.72263	5.43814	1.98814	1.81808	5.32631	1.60986	1.5513	3.80172	4.61493	4.83221	7.96123	0.988845	1.08353	1.49377	21.9755	4.24967	3.04417	2.32096	5.80279	1.18871
1508	28	0	3	1	0	1	0	0	1	0	0	1	2730	0	17.6198	18.2882	31.222	3.58824	3.72263	5.30203	1.98814	1.81808	5.44557	1.60986	1.5513	3.83101	4.61493	4.83221	7.9382	0.988845	1.08353	1.46915	22.3767	4.2043	3.08393	2.33072	5.79511	1.18051
1509	29	0	1	3	0	1	1	1	0	0	0	1	2800	1	17.6198	18.2882	30.7908	3.58824	3.72263	5.59397	1.98814	1.81808	5.45653	1.60986	1.5513	3.89034	4.61493	4.83221	8.16506	0.988845	1.08353	1.53582	22.2329	4.30161	3.08758	2.3505	5.87073	1.20273
1510	29	0	3	2	0	1	1	1	0	0	0	1	3180	0	17.6198	18.2882	29.3522	3.58824	3.72263	5.33185	1.98814	1.81808	5.1288	1.60986	1.5513	3.6686	4.61493	4.83221	7.79986	0.988845	1.08353	1.46297	21.7534	4.21424	2.97834	2.27659	5.749	1.17845
1511	26	0	1	3	0	0	1	0	0	1	0	2	3290	1	17.6781	18.1689	31.7128	3.59687	3.71135	5.35512	1.90322	1.83421	5.56287	1.55677	1.57401	3.8942	4.66646	4.81537	8.03564	1.00132	1.09021	1.47232	22.5199	4.22111	3.1001	2.34166	5.83916	1.18795
1512	26	0	3	2	0	1	0	0	0	0	0	1	3170	0	17.6781	18.1689	34.6298	3.59687	3.71135	5.51429	1.90322	1.83421	5.95642	1.55677	1.57401	4.11625	4.66646	4.81537	8.55376	1.00132	1.09021	1.56318	23.4923	4.27417	3.23128	2.41568	6.01186	1.21824
1513	32	0	1	1	0	0	1	0	0	0	0	2	3050	1	17.207	18.3856	34.4047	3.48994	3.76469	5.44086	1.78029	1.88514	5.93191	1.47728	1.62028	4.08223	4.54659	4.88442	8.48048	0.980778	1.10218	1.54378	23.3325	4.23183	3.19911	2.39326	5.9705	1.20891
1514	32	0	2	4	0	0	0	0	1	0	0	2	3400	0	17.207	18.3856	32.1277	3.48994	3.76469	5.48506	1.78029	1.88514	5.69952	1.47728	1.62028	3.97414	4.54659	4.88442	8.23471	0.980778	1.10218	1.51306	22.5735	4.24656	3.12165	2.35723	5.88857	1.19868
1515	25	0	3	3	0	0	0	0	0	0	0	1	2600	1	16.1656	19.6366	32.3698	3.2504	4.00596	5.1172	1.55832	2.07008	5.57843	1.31782	1.74646	3.86412	4.25554	5.2865	7.71689	0.920904	1.17757	1.4012	22.724	4.12452	3.06894	2.30946	5.75297	1.16656
1516	25	0	2	1	0	1	0	0	1	0	0	1	3440	0	16.1656	19.6366	34.8549	3.2504	4.00596	5.45524	1.55832	2.07008	6.14403	1.31782	1.74646	4.21073	4.25554	5.2865	8.48512	0.920904	1.17757	1.53949	23.5524	4.2372	3.25748	2.425	6.00905	1.21266
1517	31	0	3	3	0	1	1	0	0	0	0	1	3200	1	16.1656	19.6366	31.656	3.2504	4.00596	5.27009	1.55832	2.07008	5.73583	1.31782	1.74646	3.97872	4.25554	5.2865	7.90077	0.920904	1.17757	1.43529	22.4861	4.17549	3.12141	2.34767	5.81427	1.17792
1518	31	0	3	2	0	0	1	0	0	0	0	2	3290	0	16.1656	19.6366	34.8549	3.2504	4.00596	5.45524	1.55832	2.07008	6.14403	1.31782	1.74646	4.21073	4.25554	5.2865	8.48512	0.920904	1.17757	1.53949	23.5524	4.2372	3.25748	2.425	6.00905	1.21266
1519	29	0	1	1	0	1	0	0	0	0	0	1	3460	1	16.0645	19.7632	34.8831	3.22119	4.03915	5.42406	1.54512	2.1033	6.14139	1.30732	1.77355	4.20123	4.22383	5.32082	8.49949	0.912796	1.18708	1.5376	23.5703	4.22813	3.26327	2.42737	6.01472	1.21249
1520	29	0	1	2	0	0	0	0	0	1	0	1	3250	0	16.0645	19.7632	36.0908	3.22119	4.03915	5.78507	1.54512	2.1033	6.46422	1.30732	1.77355	4.47484	4.22383	5.32082	8.82147	0.912796	1.18708	1.61297	23.9728	4.34847	3.37088	2.51857	6.12204	1.23761
1521	25	0	1	3	0	0	0	0	0	0	0	1	3100	1	15.674	20.4187	35.5992	3.13117	4.19721	5.59724	1.5048	2.22265	6.35824	1.27731	1.87887	4.37058	4.10786	5.51772	8.64383	0.887824	1.22863	1.57128	23.8973	4.30854	3.3619	2.50892	6.08981	1.22925
1522	25	0	1	4	0	1	0	0	0	0	0	1	3490	0	15.674	20.4187	35.3037	3.13117	4.19721	5.51169	1.5048	2.22265	6.2715	1.27731	1.87887	4.29548	4.10786	5.51772	8.57088	0.887824	1.22863	1.55318	23.7988	4.28002	3.33298	2.48389	6.06549	1.22321
1523	28	0	1	3	0	0	0	0	0	0	0	1	2950	1	15.6789	20.6912	33.0771	3.12145	4.25327	5.0452	1.49679	2.31757	5.7774	1.27272	1.95434	3.91012	4.10737	5.57946	7.86125	0.885486	1.23821	1.40343	23.1491	4.13997	3.19725	2.37906	5.84936	1.17571
1524	28	0	2	4	0	1	0	0	0	0	0	1	2900	0	15.6789	20.6912	33.7087	3.12145	4.25327	5.13173	1.49679	2.31757	5.92377	1.27272	1.95434	3.99658	4.10737	5.57946	8.06103	0.885486	1.23821	1.4389	23.3596	4.16882	3.24604	2.40788	5.91595	1.18753
1525	36	0	3	3	0	0	1	0	0	0	0	2	3200	1	15.6789	20.6912	36.2257	3.12145	4.25327	5.7372	1.49679	2.31757	6.4693	1.27272	1.95434	4.43876	4.10737	5.57946	8.8689	0.885486	1.23821	1.61611	24.1986	4.37064	3.42788	2.55528	6.18524	1.2466
1526	36	0	1	3	0	1	0	1	0	0	0	2	3200	0	15.6789	20.6912	35.4064	3.12145	4.25327	5.50213	1.49679	2.31757	6.2781	1.27272	1.95434	4.27951	4.10737	5.57946	8.59926	0.885486	1.23821	1.55666	23.9255	4.29228	3.36415	2.50219	6.09536	1.22679
1527	32	0	1	1	0	0	0	0	0	0	0	1	2800	1	15.5709	21.3451	31.063	3.0895	4.37718	5.01152	1.46187	2.43188	5.74967	1.24206	2.04142	3.89851	4.07989	5.76902	7.65463	0.877164	1.27485	1.36593	22.6597	4.1594	3.21448	2.394	5.83451	1.17265
1528	32	0	1	4	0	1	0	0	0	0	0	1	3630	0	15.5709	21.3451	33.457	3.0895	4.37718	5.0545	1.46187	2.43188	5.91118	1.24206	2.04142	3.96963	4.07989	5.76902	7.95067	0.877164	1.27485	1.41414	23.4577	4.17373	3.26831	2.4177	5.93319	1.18872
1529	26	0	1	3	0	0	0	0	0	0	0	2	3000	1	15.3203	21.7439	36.0022	3.03908	4.43718	5.67833	1.41422	2.51974	6.44349	1.20433	2.1086	4.39904	4.0111	5.88762	8.75591	0.864409	1.29673	1.59154	24.3554	4.38486	3.45915	2.57066	6.21821	1.25089
1530	26	0	1	3	0	1	1	0	1	1	0	1	3430	0	15.3203	21.7439	34.5716	3.03908	4.43718	5.23529	1.41422	2.51974	6.1626	1.20433	2.1086	4.13057	4.0111	5.88762	8.28032	0.864409	1.29673	1.47957	23.8786	4.23719	3.36552	2.48117	6.05968	1.21357
1531	28	0	1	1	0	1	0	0	0	0	0	2	2650	1	15.3203	21.7439	31.7242	3.03908	4.43718	4.82663	1.41422	2.51974	5.52433	1.20433	2.1086	3.72865	4.0111	5.88762	7.38632	0.864409	1.29673	1.31593	22.9295	4.10097	3.15277	2.34719	5.76168	1.15902
1532	28	0	3	2	0	1	1	0	0	0	0	2	3120	0	15.3203	21.7439	34.5678	3.03908	4.43718	5.21858	1.41422	2.51974	6.14107	1.20433	2.1086	4.11455	4.0111	5.88762	8.29679	0.864409	1.29673	1.48236	23.8773	4.23161	3.35835	2.47583	6.06517	1.2145
1533	31	0	3	1	0	0	1	0	0	0	0	2	3250	1	14.777	22.2566	36.0416	2.92176	4.5116	5.66586	1.32597	2.61255	6.51652	1.13325	2.18672	4.41995	3.85371	6.03862	8.68104	0.832874	1.3265	1.56941	24.3584	4.36641	3.48501	2.57997	6.19112	1.24293
1534	31	0	1	4	0	1	0	0	0	0	0	1	3550	0	14.777	22.2566	36.12	2.92176	4.5116	5.69817	1.32597	2.61255	6.47648	1.13325	2.18672	4.40181	3.85371	6.03862	8.75516	0.832874	1.3265	1.5868	24.3845	4.37718	3.47167	2.57393	6.21583	1.24873
1535	29	0	1	2	0	0	0	0	0	0	0	2	3040	1	14.5076	22.4689	35.5978	2.86216	4.54169	5.53901	1.28359	2.64639	6.39184	1.10134	2.2122	4.32042	3.76641	6.1054	8.53028	0.818436	1.33684	1.53832	24.1914	4.31429	3.44061	2.54465	6.13403	1.2312
1536	29	0	1	1	0	0	1	0	0	0	0	1	3500	0	14.5076	22.4689	31.7333	2.86216	4.54169	4.81588	1.28359	2.64639	5.55482	1.10134	2.2122	3.71299	3.76641	6.1054	7.31559	0.818436	1.33684	1.29461	22.9033	4.07324	3.1616	2.34217	5.72913	1.14996
1537	26	1	3	2	0	1	0	0	0	0	0	1	3760	1	14.0538	23.016	36.4326	2.7573	4.64945	5.69212	1.23404	2.72274	6.62674	1.06835	2.26519	4.479	3.62295	6.27647	8.73937	0.792107	1.3645	1.57821	24.5008	4.36629	3.52784	2.60418	6.21293	1.24494
1538	26	0	3	4	0	0	1	0	0	0	0	2	2800	0	14.0538	23.016	35.8036	2.7573	4.64945	5.50828	1.23404	2.72274	6.4714	1.06835	2.26519	4.35442	3.62295	6.27647	8.52642	0.792107	1.3645	1.53429	24.2911	4.30501	3.47606	2.56265	6.14194	1.2303
1539	32	0	3	4	0	1	1	0	1	0	0	1	3130	0	13.9388	23.8568	36.7911	2.71375	4.81043	5.69875	1.21681	2.82095	6.85072	1.06046	2.33035	4.62362	3.57512	6.52035	8.79582	0.782844	1.40698	1.58673	24.8622	4.40764	3.62949	2.67148	6.2971	1.25885
1540	32	0	3	3	0	1	1	0	1	0	0	2	3300	1	13.9388	23.8568	35.4006	2.71375	4.81043	5.24437	1.21681	2.82095	6.62459	1.06046	2.33035	4.38892	3.57512	6.52035	8.291	0.782844	1.40698	1.46717	24.3987	4.25618	3.55412	2.59324	6.12882	1.219
1541	28	0	1	1	0	0	1	0	0	0	0	2	3250	1	13.8897	24.1099	36.7434	2.70004	4.85209	5.89437	1.21116	2.84014	6.70334	1.05777	2.34541	4.5739	3.55865	6.58893	8.94775	0.779138	1.41879	1.62904	24.9144	4.48217	3.58488	2.65903	6.36511	1.27566
1542	28	0	1	3	0	0	1	0	0	1	0	1	3300	0	13.8897	24.1099	36.799	2.70004	4.85209	5.6818	1.21116	2.84014	6.92192	1.05777	2.34541	4.65729	3.55865	6.58893	8.75287	0.779138	1.41879	1.57398	24.9329	4.41131	3.65774	2.68682	6.30015	1.2573
1543	27	0	1	1	0	0	0	0	0	0	0	2	2750	1	13.8861	24.6406	37.0169	2.68614	4.94508	5.66394	1.20733	2.91169	7.14381	1.0584	2.38937	4.79277	3.54561	6.74845	8.7156	0.777133	1.44595	1.5592	25.1812	4.43172	3.75428	2.74685	6.33655	1.26076
1544	27	1	1	3	0	1	0	1	0	0	0	2	3300	0	13.8861	24.6406	37.5728	2.68614	4.94508	5.905	1.20733	2.91169	7.05844	1.0584	2.38937	4.78026	3.54561	6.74845	9.02536	0.777133	1.44595	1.62749	25.3665	4.51207	3.72582	2.74268	6.43981	1.28353
1545	30	0	3	3	0	1	0	0	0	0	0	1	3050	1	13.8507	24.6483	36.5426	2.67788	4.95245	5.91952	1.20077	2.92277	6.70345	1.0558	2.39589	4.58893	3.52782	6.75905	8.94628	0.774891	1.44665	1.63231	25.0139	4.51661	3.609	2.68021	6.41105	1.28462
1546	30	0	3	2	0	1	0	0	0	0	0	2	3200	0	13.8507	24.6483	36.739	2.67788	4.95245	5.87337	1.20077	2.92277	6.79833	1.0558	2.39589	4.63006	3.52782	6.75905	8.91132	0.774891	1.44665	1.61851	25.0793	4.50123	3.64062	2.69392	6.3994	1.28002
1547	25	0	1	1	0	0	1	0	0	0	0	2	3240	1	13.5061	24.8808	36.5692	2.58677	5.00052	5.97394	1.14952	2.96421	6.67481	1.00939	2.42224	4.60791	3.42074	6.83249	9.02823	0.751374	1.45911	1.65208	24.9854	4.52041	3.59618	2.67985	6.42716	1.28752
1548	25	0	3	1	0	1	0	0	0	0	0	1	3000	0	13.5061	24.8808	37.5593	2.58677	5.00052	5.98534	1.14952	2.96421	6.9821	1.00939	2.42224	4.7529	3.42074	6.83249	9.08616	0.751374	1.45911	1.64863	25.3154	4.52421	3.69861	2.72818	6.44646	1.28637
1549	27	1	3	1	0	0	1	0	0	0	0	2	4000	1	13.3978	25.1006	36.747	2.55837	5.03459	5.95033	1.13153	3.01401	6.76495	0.995416	2.45411	4.6368	3.38428	6.89538	8.97346	0.74233	1.47027	1.63666	25.0818	4.51443	3.63683	2.69544	6.4177	1.28309
1550	27	0	3	2	0	1	0	0	0	0	0	2	3380	0	13.3978	25.1006	38.5745	2.55837	5.03459	6.08185	1.13153	3.01401	7.22932	0.995416	2.45411	4.89831	3.38428	6.89538	9.28041	0.74233	1.47027	1.67458	25.6909	4.55827	3.79162	2.78261	6.52002	1.29573
1551	30	0	1	3	0	0	1	0	0	0	0	2	3540	1	13.5056	25.0137	37.2319	2.57853	5.0202	5.94412	1.14117	3.03196	6.88295	1.00535	2.46349	4.69035	3.40877	6.86223	9.04503	0.747725	1.46116	1.64525	25.2504	4.51428	3.68536	2.71973	6.43867	1.28471
1552	30	0	3	2	0	0	0	0	0	0	0	1	3500	0	13.5056	25.0137	36.7697	2.57853	5.0202	5.94647	1.14117	3.03196	6.7505	1.00535	2.46349	4.63124	3.40877	6.86223	9.00023	0.747725	1.46116	1.64275	25.0963	4.51507	3.64121	2.70003	6.42374	1.28388
1553	29	0	1	3	0	0	0	0	0	0	0	2	2880	1	13.6315	24.8272	37.0802	2.60531	4.98677	6.0091	1.1592	3.02785	6.76614	1.01662	2.4591	4.65738	3.4423	6.80408	9.14072	0.755	1.44825	1.67165	25.1796	4.53373	3.65106	2.71103	6.46237	1.29164
1554	29	0	1	2	0	0	0	0	0	0	0	2	3180	0	13.6315	24.8272	37.536	2.60531	4.98677	6.03969	1.1592	3.02785	6.89406	1.01662	2.4591	4.71599	3.4423	6.80408	9.17651	0.755	1.44825	1.67213	25.3316	4.54392	3.69371	2.73057	6.4743	1.2918
1555	35	0	3	3	0	1	1	0	0	0	0	2	3140	1	13.8372	24.5291	37.9273	2.65541	4.92348	6.1041	1.17414	3.04926	6.93303	1.02886	2.46681	4.75247	3.49598	6.70706	9.29651	0.767602	1.42471	1.69696	25.4312	4.56099	3.71881	2.74938	6.49985	1.29642
1556	35	0	3	3	0	1	0	0	1	0	0	1	3130	0	13.8372	24.5291	39.7938	2.65541	4.92348	6.28171	1.17414	3.04926	7.35724	1.02886	2.46681	5.00343	3.49598	6.70706	9.65604	0.767602	1.42471	1.7477	26.0534	4.6202	3.86022	2.83303	6.61969	1.31334
1557	27	0	3	1	0	1	0	0	0	0	0	2	2760	1	13.9513	24.5298	38.3012	2.66535	4.91505	6.35708	1.17683	3.18592	6.74666	1.03408	2.54161	4.72626	3.51681	6.66457	9.61803	0.76764	1.40637	1.78228	25.5941	4.64583	3.70314	2.76732	6.5998	1.31876
1558	27	0	3	2	1	1	0	0	0	0	0	2	4280	0	13.9513	24.5298	38.3012	2.66535	4.91505	6.35708	1.17683	3.18592	6.74666	1.03408	2.54161	4.72626	3.51681	6.66457	9.61803	0.76764	1.40637	1.78228	25.5941	4.64583	3.70314	2.76732	6.5998	1.31876
1559	30	0	1	4	0	1	0	0	0	0	0	2	2920	1	13.9513	24.5298	38.4161	2.66535	4.91505	6.35353	1.17683	3.18592	6.77939	1.03408	2.54161	4.74013	3.51681	6.66457	9.63298	0.76764	1.40637	1.78081	25.6324	4.64464	3.71405	2.77194	6.60478	1.31827
1560	30	0	3	3	0	1	0	1	1	0	0	1	3010	0	13.9513	24.5298	39.1097	2.66535	4.91505	6.24049	1.17683	3.18592	7.07216	1.03408	2.54161	4.85186	3.51681	6.66457	9.60567	0.76764	1.40637	1.75887	25.8636	4.60696	3.81164	2.80919	6.59568	1.31096
1561	29	0	1	3	0	0	0	0	0	0	0	1	3100	1	14.3708	24.5637	38.8211	2.74725	4.86273	6.31624	1.25064	3.31174	6.84519	1.09028	2.60473	4.76739	3.63654	6.64685	9.65387	0.792452	1.39175	1.77894	25.9185	4.64207	3.80252	2.8208	6.64575	1.32105
1562	29	0	1	2	0	1	1	0	0	0	0	2	3300	0	14.3708	24.5637	38.3755	2.74725	4.86273	6.41142	1.25064	3.31174	6.64398	1.09028	2.60473	4.67877	3.63654	6.64685	9.64569	0.792452	1.39175	1.79721	25.77	4.6738	3.73545	2.79126	6.64303	1.32714
1563	31	0	3	3	0	0	0	0	0	0	0	1	2760	1	14.3708	24.5637	38.3755	2.74725	4.86273	6.41142	1.25064	3.31174	6.64398	1.09028	2.60473	4.67877	3.63654	6.64685	9.64569	0.792452	1.39175	1.79721	25.77	4.6738	3.73545	2.79126	6.64303	1.32714
1564	31	0	3	2	0	1	1	1	1	0	0	1	3300	0	14.3708	24.5637	38.4036	2.74725	4.86273	6.39053	1.25064	3.31174	6.67735	1.09028	2.60473	4.6969	3.63654	6.64685	9.6351	0.792452	1.39175	1.79091	25.7794	4.66684	3.74657	2.7973	6.6395	1.32503
1565	32	0	3	1	0	1	1	0	1	0	0	2	3730	1	14.3708	24.5637	40.2492	2.74725	4.86273	6.33135	1.25064	3.31174	7.24345	1.09028	2.60473	4.95875	3.63654	6.64685	9.76513	0.792452	1.39175	1.78513	26.3946	4.64711	3.93527	2.88459	6.68284	1.32311
1566	32	0	1	3	0	1	0	0	0	1	0	1	2950	0	14.3708	24.5637	39.2636	2.74725	4.86273	6.27466	1.25064	3.31174	7.00489	1.09028	2.60473	4.82285	3.63654	6.64685	9.62511	0.792452	1.39175	1.76797	26.066	4.62821	3.85575	2.83928	6.63616	1.31739
1567	28	0	1	1	0	0	1	0	0	0	0	2	3480	1	14.5044	24.7191	38.599	2.77809	4.87109	6.1875	1.26871	3.40339	6.81688	1.10536	2.65456	4.71924	3.67596	6.67246	9.48354	0.800295	1.39218	1.7477	25.9408	4.61222	3.82966	2.82638	6.61066	1.31339
1568	28	0	1	2	0	0	0	0	0	0	1	2	3850	0	14.5044	24.7191	37.9043	2.77809	4.87109	6.33515	1.26871	3.40339	6.51257	1.10536	2.65456	4.59731	3.67596	6.67246	9.53033	0.800295	1.39218	1.77847	25.7093	4.66144	3.72822	2.78574	6.62625	1.32365
1569	26	0	1	2	0	0	1	0	0	0	0	1	3200	0	14.7864	24.6516	38.409	2.84227	4.83383	6.36371	1.30416	3.446	6.59621	1.13315	2.66613	4.65652	3.75869	6.63012	9.6368	0.817334	1.37918	1.79185	25.949	4.67994	3.78212	2.8186	6.6752	1.32946
1570	26	0	3	2	0	0	0	0	0	0	0	2	3400	1	14.7864	24.6516	38.4784	2.84227	4.83383	6.16609	1.30416	3.446	6.74006	1.13315	2.66613	4.68538	3.75869	6.63012	9.49466	0.817334	1.37918	1.75413	25.9721	4.61406	3.83007	2.82822	6.62782	1.31688
1571	31	0	3	2	0	0	0	0	0	0	0	1	3200	1	14.7864	24.6516	37.1805	2.84227	4.83383	6.28593	1.30416	3.446	6.29008	1.13315	2.66613	4.47427	3.75869	6.63012	9.39426	0.817334	1.37918	1.76866	25.5395	4.65401	3.68008	2.75785	6.59436	1.32173
1572	31	0	1	3	0	1	1	0	1	0	0	2	3400	0	14.7864	24.6516	38.4784	2.84227	4.83383	6.16609	1.30416	3.446	6.74006	1.13315	2.66613	4.68538	3.75869	6.63012	9.49466	0.817334	1.37918	1.75413	25.9721	4.61406	3.83007	2.82822	6.62782	1.31688
1573	35	0	3	2	0	1	1	0	0	0	0	1	3340	1	14.7864	24.6516	39.5571	2.84227	4.83383	6.20657	1.30416	3.446	7.01016	1.13315	2.66613	4.825	3.75869	6.63012	9.60529	0.817334	1.37918	1.76138	26.3317	4.62756	3.92011	2.87476	6.6647	1.3193
1574	35	0	1	3	0	1	0	1	0	0	0	2	3400	0	14.7864	24.6516	38.5388	2.84227	4.83383	6.19771	1.30416	3.446	6.73452	1.13315	2.66613	4.69301	3.75869	6.63012	9.54329	0.817334	1.37918	1.76417	25.9923	4.6246	3.82822	2.83077	6.64403	1.32023
1575	27	0	1	4	0	0	1	0	0	0	0	2	3310	1	14.9909	24.5688	39.2267	2.88892	4.79216	6.21728	1.33244	3.47281	6.8808	1.15621	2.66596	4.76542	3.81655	6.58768	9.60667	0.828985	1.36739	1.77034	26.2621	4.63279	3.89535	2.86253	6.6703	1.32224
1576	27	0	1	4	0	0	0	0	0	0	0	2	3630	0	14.9909	24.5688	38.6416	2.88892	4.79216	6.24295	1.33244	3.47281	6.70539	1.15621	2.66596	4.70004	3.81655	6.58768	9.60363	0.828985	1.36739	1.77657	26.0671	4.64134	3.83688	2.84074	6.66929	1.32431
1577	35	0	3	2	0	1	1	0	1	0	0	1	2540	1	15.2388	24.8099	36.9065	2.94404	4.81429	6.33296	1.36408	3.59407	6.10305	1.18428	2.75032	4.38163	3.8797	6.61729	9.39862	0.842783	1.36728	1.78892	25.6517	4.6971	3.68707	2.77207	6.63187	1.33299
1578	35	0	1	1	0	1	1	0	0	0	0	1	3600	0	15.2388	24.8099	36.8909	2.94404	4.81429	6.35518	1.36408	3.59407	6.08125	1.18428	2.75032	4.37239	3.8797	6.61729	9.41271	0.842783	1.36728	1.79405	25.6465	4.7045	3.6798	2.76899	6.63657	1.33471
1579	31	0	1	2	0	1	1	0	0	0	0	2	3130	0	15.3385	25.1007	37.9875	2.96616	4.85769	6.31479	1.37407	3.6741	6.38743	1.19247	2.79919	4.53299	3.90678	6.6932	9.59498	0.849128	1.37837	1.79331	26.1423	4.71288	3.81187	2.84155	6.73166	1.34027
1580	31	0	1	1	0	1	1	0	0	0	0	2	3300	1	15.3385	25.1007	36.7055	2.96616	4.85769	6.27285	1.37407	3.6741	6.06686	1.19247	2.79919	4.3591	3.90678	6.6932	9.34966	0.849128	1.37837	1.77558	25.7149	4.6989	3.70501	2.78358	6.64988	1.33436
1581	26	0	1	3	0	0	1	0	0	0	0	2	3220	1	15.4998	24.8822	39.1053	2.99412	4.80783	6.50028	1.39408	3.70312	6.53722	1.2094	2.79768	4.65382	3.94423	6.64129	9.88961	0.859016	1.35866	1.85071	26.4958	4.76741	3.87814	2.88697	6.82504	1.35613
1582	26	0	1	1	0	1	1	1	0	0	0	2	3400	0	15.4998	24.8822	38.3473	2.99412	4.80783	6.43434	1.39408	3.70312	6.37516	1.2094	2.79768	4.55508	3.94423	6.64129	9.72234	0.859016	1.35866	1.82781	26.2431	4.74543	3.82412	2.85406	6.76929	1.34849
1583	30	0	1	1	0	0	0	0	0	0	0	2	3180	1	15.4998	24.8822	38.4193	2.99412	4.80783	6.42993	1.39408	3.70312	6.40144	1.2094	2.79768	4.57333	3.94423	6.64129	9.74082	0.859016	1.35866	1.82752	26.2671	4.74396	3.83288	2.86014	6.77545	1.3484
1584	30	0	1	1	0	1	1	0	0	0	0	1	3200	0	15.4998	24.8822	39.8421	2.99412	4.80783	6.50251	1.39408	3.70312	6.74626	1.2094	2.79768	4.77171	3.94423	6.64129	10.0167	0.859016	1.35866	1.85283	26.7414	4.76816	3.94782	2.92626	6.86739	1.35683
1585	25	0	1	4	0	1	1	0	0	0	0	1	3020	1	15.8669	25.0589	38.3242	3.06123	4.81018	6.685	1.43322	3.88731	6.07536	1.23895	2.89339	4.43113	4.04504	6.70868	9.82754	0.878084	1.35191	1.90908	26.4166	4.85214	3.79863	2.85449	6.86042	1.37969
1586	25	0	3	2	0	0	1	0	0	0	0	2	3200	0	15.8669	25.0589	38.4739	3.06123	4.81018	6.53995	1.43322	3.88731	6.23198	1.23895	2.89339	4.50917	4.04504	6.70868	9.76427	0.878084	1.35191	1.86579	26.4666	4.80379	3.85083	2.8805	6.83933	1.36526
1587	30	0	1	3	0	0	0	0	0	0	0	2	2970	1	15.9511	25.1878	37.8284	3.08437	4.81472	6.68202	1.44366	3.95053	5.90267	1.24678	2.93054	4.32133	4.07099	6.74431	9.7222	0.883234	1.35352	1.90423	26.3224	4.86037	3.76562	2.83288	6.84583	1.38033
1588	30	0	1	2	0	1	1	0	1	0	0	2	3380	0	15.9511	25.1878	38.5762	3.08437	4.81472	6.56498	1.44366	3.95053	6.20908	1.24678	2.93054	4.50079	4.07099	6.74431	9.78159	0.883234	1.35352	1.87363	26.5717	4.82136	3.86776	2.8927	6.86563	1.37013
1589	24	0	1	2	0	1	0	0	0	0	0	1	2650	1	15.9974	25.6195	39.4031	3.09049	4.86998	6.6245	1.44627	4.07902	6.34618	1.24886	3.01306	4.58157	4.08211	6.87535	9.93078	0.885142	1.37466	1.88429	27.0067	4.86166	3.95716	2.94783	6.96275	1.38136
1590	24	0	1	3	0	0	1	0	0	0	0	2	3080	0	15.9974	25.6195	39.4031	3.09049	4.86998	6.6245	1.44627	4.07902	6.34618	1.24886	3.01306	4.58157	4.08211	6.87535	9.93078	0.885142	1.37466	1.88429	27.0067	4.86166	3.95716	2.94783	6.96275	1.38136
1591	37	0	1	1	0	1	0	0	0	0	0	1	3080	1	15.9974	25.6195	39.1114	3.09049	4.86998	6.61253	1.44627	4.07902	6.2667	1.24886	3.01306	4.5261	4.08211	6.87535	9.8675	0.885142	1.37466	1.88172	26.9094	4.85767	3.93066	2.92934	6.94165	1.38051
1592	37	0	3	3	0	1	1	0	1	0	0	2	3580	0	15.9974	25.6195	38.6342	3.09049	4.86998	6.59031	1.44627	4.07902	6.17461	1.24886	3.01306	4.48326	4.08211	6.87535	9.77485	0.885142	1.37466	1.87312	26.7503	4.85026	3.89997	2.91506	6.91077	1.37764
1593	25	0	2	3	0	1	1	0	0	0	0	1	3050	1	15.9663	26.2075	39.7585	3.0851	4.95408	6.65547	1.44466	4.26674	6.3157	1.24808	3.13033	4.56344	4.07275	7.03085	9.98121	0.884371	1.39946	1.89281	27.3108	4.89821	4.00903	2.98062	7.02827	1.39221
1594	25	0	3	4	0	1	1	0	0	0	0	1	3500	0	15.9663	26.2075	37.7551	3.0851	4.95408	6.7239	1.44466	4.26674	5.78918	1.24808	3.13033	4.26989	4.07275	7.03085	9.6702	0.884371	1.39946	1.89778	26.643	4.92103	3.83353	2.88277	6.9246	1.39387
1595	30	0	1	1	0	0	1	0	0	0	0	2	2850	1	15.8878	26.7505	37.797	3.07339	5.05382	6.69839	1.4378	4.37653	5.71429	1.24288	3.21205	4.20611	4.05255	7.17071	9.70514	0.880573	1.42675	1.90735	26.8117	4.94187	3.84287	2.88701	6.97613	1.40489
1596	30	0	3	3	0	0	0	0	1	0	0	1	2960	0	15.8878	26.7505	37.7349	3.07339	5.05382	6.73264	1.4378	4.37653	5.79737	1.24288	3.21205	4.29468	4.05255	7.17071	9.65104	0.880573	1.42675	1.89526	26.7911	4.95328	3.87056	2.91654	6.9581	1.40086
1597	26	0	3	1	0	0	0	0	0	0	0	2	3450	1	15.9429	27.3288	38.3918	3.08219	5.15346	6.48863	1.44144	4.49408	5.99556	1.24627	3.28689	4.35806	4.06631	7.32262	9.66913	0.883565	1.45418	1.84582	27.2212	4.9081	3.97703	2.96374	7.01935	1.39452
1598	26	0	3	1	0	0	1	0	0	0	0	2	3580	0	15.9429	27.3288	37.7672	3.08219	5.15346	6.49708	1.44144	4.49408	5.85739	1.24627	3.28689	4.29645	4.06631	7.32262	9.57063	0.883565	1.45418	1.84338	27.013	4.91091	3.93097	2.9432	6.98652	1.39371
1599	31	0	3	3	0	1	1	1	0	0	0	2	2890	1	16.0105	27.7156	36.938	3.0946	5.23104	6.56503	1.44736	4.57986	5.59763	1.25208	3.34981	4.13472	4.08223	7.42606	9.45913	0.887589	1.47349	1.85586	26.888	4.96355	3.87495	2.9122	6.98914	1.40565
1600	31	0	1	4	0	1	0	0	1	0	0	2	3200	0	16.0105	27.7156	36.8144	3.0946	5.23104	6.64835	1.44736	4.57986	5.56141	1.25208	3.34981	4.14874	4.08223	7.42606	9.4692	0.887589	1.47349	1.86647	26.8468	4.99133	3.86288	2.91688	6.9925	1.40918
1601	29	0	1	2	0	0	0	0	0	0	0	2	2900	1	16.1503	27.9487	38.0288	3.13032	5.27468	6.44934	1.46246	4.64004	5.90254	1.26531	3.38489	4.31483	4.11792	7.50568	9.58033	0.897633	1.48384	1.83708	27.3759	4.95144	4.00168	2.98835	7.06798	1.40618
1602	29	0	1	2	0	0	1	0	0	0	0	1	3430	0	16.1503	27.9487	37.5158	3.13032	5.27468	6.68583	1.46246	4.64004	5.72135	1.26531	3.38489	4.25938	4.11792	7.50568	9.59225	0.897633	1.48384	1.88485	27.2049	5.03028	3.94128	2.96986	7.07195	1.42211
1603	28	0	3	1	0	1	1	0	1	0	0	2	2550	1	16.1516	28.0058	38.2036	3.1365	5.27988	6.56041	1.46638	4.67279	5.86257	1.26714	3.40183	4.31034	4.12437	7.51731	9.65065	0.899134	1.48299	1.86547	27.4537	4.99226	4.00058	2.9931	7.09744	1.41587
1604	28	0	3	3	0	0	1	0	0	0	0	1	4030	0	16.1516	28.0058	37.4938	3.1365	5.27988	6.75166	1.46638	4.67279	5.64236	1.26714	3.40183	4.21977	4.12437	7.51731	9.62105	0.899134	1.48299	1.89954	27.217	5.05601	3.92718	2.96291	7.08758	1.42722
1605	27	0	1	4	0	1	1	1	0	0	0	2	2900	1	16.1274	28.5789	37.8246	3.15084	5.33782	6.84809	1.47309	4.82557	5.63249	1.26875	3.49674	4.23351	4.1308	7.67952	9.68033	0.90212	1.50773	1.91712	27.5103	5.11225	3.97705	2.99967	7.16355	1.44232
1606	27	0	1	2	0	0	0	0	0	0	0	1	3330	0	16.1274	28.5789	38.2681	3.15084	5.33782	6.77754	1.47309	4.82557	5.6559	1.26875	3.49674	4.20531	4.1308	7.67952	9.76717	0.90212	1.50773	1.92883	27.6581	5.08873	3.98485	2.99027	7.1925	1.44623
1607	26	0	3	1	0	1	1	0	0	0	0	1	3330	1	16.2161	29.1462	36.9404	3.18197	5.395	6.76486	1.48712	4.97103	5.40775	1.27768	3.59961	4.07558	4.16048	7.85289	9.43923	0.910849	1.53667	1.88035	27.4342	5.11394	3.9553	2.98429	7.15087	1.44262
1608	26	0	3	2	0	1	0	0	0	0	0	2	3000	0	16.2161	29.1462	37.8705	3.18197	5.395	6.88234	1.48712	4.97103	5.59786	1.27768	3.59961	4.21375	4.16048	7.85289	9.64373	0.910849	1.53667	1.91259	27.7443	5.1531	4.01867	3.03035	7.21903	1.45337
1609	32	0	1	2	0	0	0	0	0	0	0	1	3220	1	16.2161	29.1462	37.9362	3.18197	5.395	6.82384	1.48712	4.97103	5.64281	1.27768	3.59961	4.22982	4.16048	7.85289	9.60925	0.910849	1.53667	1.90063	27.7662	5.1336	4.03365	3.0357	7.20754	1.44938
1610	32	0	1	1	0	1	1	0	0	0	0	2	3160	0	16.2161	29.1462	37.9362	3.18197	5.395	6.82384	1.48712	4.97103	5.64281	1.27768	3.59961	4.22982	4.16048	7.85289	9.60925	0.910849	1.53667	1.90063	27.7662	5.1336	4.03365	3.0357	7.20754	1.44938
1611	31	0	3	3	0	1	1	0	0	0	0	1	4150	1	16.4128	29.4364	37.4466	3.22523	5.33125	6.94663	1.51622	4.9353	5.626	1.30111	3.56989	4.23622	4.20132	7.78515	9.72441	0.921855	1.51994	1.92912	27.7653	5.1677	4.02584	3.03574	7.23696	1.45697
1612	31	0	3	1	0	1	1	0	0	1	0	2	2510	0	16.4128	29.4364	37.75	3.22523	5.33125	6.93668	1.51622	4.9353	5.72862	1.30111	3.56989	4.30193	4.20132	7.78515	9.76961	0.921855	1.51994	1.9318	27.8664	5.16439	4.06005	3.05764	7.25202	1.45786
1613	25	0	3	3	0	0	1	0	0	0	0	2	2560	1	16.4258	29.8452	37.3252	3.22395	5.39482	6.85807	1.51816	5.07269	5.5439	1.30182	3.64599	4.18077	4.20587	7.89137	9.65158	0.921307	1.53024	1.92335	27.8654	5.15894	4.04492	3.04286	7.24961	1.4583
1614	25	0	3	1	0	0	0	0	0	0	0	2	2950	0	16.4258	29.8452	37.8228	3.22395	5.39482	6.87717	1.51816	5.07269	5.56385	1.30182	3.64599	4.18076	4.20587	7.89137	9.79646	0.921307	1.53024	1.94693	28.0312	5.16531	4.05156	3.04286	7.2979	1.46616
1615	33	0	2	1	0	1	1	0	0	0	0	1	3070	1	16.5619	29.9357	37.3754	3.25229	5.34592	6.92486	1.53452	5.05023	5.55366	1.31154	3.62926	4.17615	4.24929	7.82388	9.80388	0.929088	1.51599	1.95553	27.9577	5.17436	4.04614	3.03898	7.29235	1.46687
1616	33	0	1	1	0	1	0	0	0	0	0	1	3790	0	16.5619	29.9357	36.4949	3.25229	5.34592	6.9901	1.53452	5.05023	5.37684	1.31154	3.62926	4.13322	4.24929	7.82388	9.6624	0.929088	1.51599	1.96333	27.6642	5.19611	3.9872	3.02467	7.24519	1.46947
1617	23	0	1	3	0	0	1	0	0	0	0	1	2660	1	17.089	29.8976	37.9531	3.38565	5.22795	7.22532	1.59915	5.06775	5.70653	1.35709	3.63148	4.34495	4.4125	7.70487	10.0675	0.96602	1.47951	2.02051	28.3132	5.27964	4.12448	3.11117	7.39497	1.48868
1618	23	0	1	1	0	1	0	0	0	0	0	1	3400	0	17.089	29.8976	37.0772	3.38565	5.22795	7.09077	1.59915	5.06775	5.52685	1.35709	3.63148	4.21245	4.4125	7.70487	9.84931	0.96602	1.47951	1.98208	28.0213	5.23479	4.06458	3.067	7.32223	1.47587
1619	25	0	1	2	0	0	1	0	0	0	0	2	3050	1	17.4352	32.2396	35.0997	3.49263	5.30001	7.17376	1.67016	5.35994	5.32803	1.42236	3.77181	4.14108	4.55407	8.01941	9.68775	1.01127	1.50592	1.97453	28.2582	5.32213	4.11938	3.11175	7.42041	1.49724
1620	25	0	1	2	0	1	1	0	0	0	0	1	2670	0	17.4352	32.2396	34.9252	3.49263	5.30001	7.21867	1.67016	5.35994	5.24213	1.42236	3.77181	4.13032	4.55407	8.01941	9.69299	1.01127	1.50592	2.00262	28.2	5.3371	4.09074	3.10816	7.42216	1.5066
1621	34	0	1	2	0	0	0	0	0	0	0	2	3600	1	18.1248	33.1856	34.271	3.67782	5.34614	7.22447	1.78504	5.62683	5.03254	1.52338	3.91594	4.01574	4.77803	8.26775	9.5027	1.06312	1.53651	1.97771	28.5271	5.41614	4.14814	3.15169	7.51616	1.52578
1622	34	0	2	3	0	1	1	0	1	0	0	2	3330	0	18.1248	33.1856	34.4722	3.67782	5.34614	7.19884	1.78504	5.62683	5.1303	1.52338	3.91594	4.05114	4.77803	8.26775	9.51014	1.06312	1.53651	1.94857	28.5942	5.4076	4.18072	3.16349	7.51864	1.51607
1623	30	0	3	3	0	1	0	1	0	0	0	1	3580	1	18.2368	33.4576	33.8742	3.70392	5.37356	7.17732	1.80212	5.68752	4.95157	1.53741	3.9548	3.9669	4.8104	8.32467	9.41902	1.07178	1.54461	1.96203	28.5229	5.41827	4.14707	3.15304	7.51803	1.52614
1624	30	0	1	3	0	0	0	0	0	0	0	2	2950	0	18.2368	33.4576	33.8742	3.70392	5.37356	7.17732	1.80212	5.68752	4.95157	1.53741	3.9548	3.9669	4.8104	8.32467	9.41902	1.07178	1.54461	1.96203	28.5229	5.41827	4.14707	3.15304	7.51803	1.52614
1625	34	0	3	3	0	0	0	0	0	0	0	1	3200	1	18.319	33.6049	34.2786	3.72363	5.39404	7.26961	1.81511	5.74223	4.98888	1.54913	3.98808	4.00546	4.83544	8.33611	9.5615	1.08018	1.54141	1.99266	28.7342	5.46243	4.18208	3.18089	7.57769	1.53808
1626	34	0	1	3	0	1	1	0	0	0	0	1	3850	0	18.319	33.6049	32.6305	3.72363	5.39404	7.05839	1.81511	5.74223	4.71686	1.54913	3.98808	3.79747	4.83544	8.33611	9.27081	1.08018	1.54141	1.94165	28.1848	5.39202	4.0914	3.11156	7.48079	1.52108
1627	32	0	2	1	0	1	1	1	1	0	0	1	2950	0	18.2882	34.4038	33.5593	3.72263	5.55548	7.06712	1.81808	5.91273	4.85931	1.5513	4.12955	3.84978	4.83221	8.52926	9.35558	1.08353	1.57733	1.92338	28.7504	5.44841	4.19671	3.17688	7.57235	1.52808
1628	32	0	1	3	0	1	0	0	1	1	0	1	2890	1	18.2882	34.4038	33.264	3.72263	5.55548	7.0795	1.81808	5.91273	4.70783	1.5513	4.12955	3.78093	4.83221	8.52926	9.33379	1.08353	1.57733	1.94782	28.652	5.45254	4.14621	3.15393	7.56509	1.53622
1629	32	0	3	2	0	1	0	0	0	0	0	2	3500	1	18.5276	36.0749	30.9746	3.79371	5.84821	6.81385	1.90451	6.33891	4.21096	1.63296	4.40604	3.44783	4.92743	8.91762	8.95151	1.1092	1.64177	1.89077	28.5257	5.48526	4.15146	3.16228	7.59885	1.54725
1630	32	0	1	2	0	0	0	0	0	0	0	2	3700	0	18.5276	36.0749	32.124	3.79371	5.84821	6.93182	1.90451	6.33891	4.36526	1.63296	4.40604	3.57644	4.92743	8.91762	9.11218	1.1092	1.64177	1.91892	28.9089	5.52458	4.20289	3.20514	7.65241	1.55663
1631	28	0	3	1	0	0	0	0	0	0	0	2	2500	1	18.7949	36.0633	30.997	3.85009	5.83927	6.8253	1.93971	6.3507	4.20103	1.65605	4.41483	3.45206	5.01226	8.90492	8.95795	1.1243	1.64058	1.88707	28.6184	5.50489	4.16381	3.17431	7.62505	1.55065
1632	28	0	3	2	0	1	1	0	0	1	0	1	3250	0	18.7949	36.0633	31.1071	3.85009	5.83927	6.85107	1.93971	6.3507	4.21011	1.65605	4.41483	3.45986	5.01226	8.90492	8.98523	1.1243	1.64058	1.89021	28.6551	5.51348	4.16684	3.17691	7.63414	1.5517
1633	30	0	1	4	0	0	0	0	0	0	0	2	3500	1	19.115	36.034	31.3273	3.91035	5.83111	6.91598	1.97903	6.34134	4.23145	1.68246	4.4087	3.47229	5.11225	8.89455	9.04079	1.14317	1.63786	1.90292	28.8255	5.55248	4.18394	3.18782	7.68253	1.56132
1634	30	0	2	2	0	0	1	0	0	0	0	1	3000	0	19.115	36.034	31.5669	3.91035	5.83111	6.89314	1.97903	6.34134	4.26972	1.68246	4.4087	3.50718	5.11225	8.89455	9.01888	1.14317	1.63786	1.90811	28.9053	5.54487	4.1967	3.19945	7.67523	1.56305
1635	33	0	3	1	0	0	1	0	0	1	0	2	2900	1	19.115	36.034	31.9311	3.91035	5.83111	6.92379	1.97903	6.34134	4.34189	1.68246	4.4087	3.56876	5.11225	8.89455	9.06141	1.14317	1.63786	1.91197	29.0267	5.55509	4.22075	3.21997	7.68941	1.56433
1636	33	0	1	2	0	1	1	0	1	1	0	1	3150	0	19.115	36.034	30.8641	3.91035	5.83111	6.81898	1.97903	6.34134	4.20097	1.68246	4.4087	3.45347	5.11225	8.89455	8.91731	1.14317	1.63786	1.88601	28.6711	5.52015	4.17378	3.18154	7.64137	1.55568
1637	28	0	1	3	0	1	1	0	0	0	0	2	3260	1	19.2842	36.1046	30.9972	3.94437	5.84052	6.86961	2.00873	6.35953	4.1912	1.70243	4.42389	3.44869	5.17628	8.91526	8.93795	1.15433	1.64329	1.88481	28.7954	5.5515	4.18649	3.19167	7.6765	1.56081
1638	28	0	3	3	0	1	0	0	1	0	0	2	3550	0	19.2842	36.1046	30.7462	3.94437	5.84052	6.81592	2.00873	6.35953	4.1788	1.70243	4.42389	3.43808	5.17628	8.91526	8.87417	1.15433	1.64329	1.87801	28.7117	5.5336	4.18235	3.18813	7.65524	1.55854
1639	33	0	1	1	0	0	0	0	0	1	0	2	3530	1	19.2842	36.1046	31.149	3.94437	5.84052	6.89795	2.00873	6.35953	4.17802	1.70243	4.42389	3.42885	5.17628	8.91526	8.97313	1.15433	1.64329	1.89015	28.8459	5.56095	4.18209	3.18506	7.68823	1.56259
1640	33	0	1	1	0	1	1	0	1	0	0	2	3250	0	19.2842	36.1046	30.9972	3.94437	5.84052	6.86961	2.00873	6.35953	4.1912	1.70243	4.42389	3.44869	5.17628	8.91526	8.93795	1.15433	1.64329	1.88481	28.7954	5.5515	4.18649	3.19167	7.6765	1.56081
1641	27	0	1	1	0	0	0	0	0	0	0	1	2810	1	19.5446	36.144	30.4251	3.99154	5.86954	6.72024	2.05294	6.37092	4.09565	1.73326	4.44055	3.34566	5.26717	8.91828	8.75681	1.17127	1.64353	1.84942	28.7046	5.52711	4.17317	3.17316	7.64742	1.55474
1642	27	0	1	1	0	0	0	0	0	0	0	2	3430	0	19.5446	36.144	30.8929	3.99154	5.86954	6.80491	2.05294	6.37092	4.17003	1.73326	4.44055	3.39007	5.26717	8.91828	8.85598	1.17127	1.64353	1.87061	28.8605	5.55533	4.19796	3.18796	7.68048	1.5618
1643	32	0	1	3	0	0	1	0	0	0	0	2	2950	1	19.5446	36.144	30.0242	3.99154	5.86954	6.65267	2.05294	6.37092	4.03764	1.73326	4.44055	3.30343	5.26717	8.91828	8.64687	1.17127	1.64353	1.82909	28.571	5.50458	4.15383	3.15908	7.61078	1.54796
1644	32	0	1	1	0	1	0	0	0	0	0	1	3200	0	19.5446	36.144	30.8929	3.99154	5.86954	6.80491	2.05294	6.37092	4.17003	1.73326	4.44055	3.39007	5.26717	8.91828	8.85598	1.17127	1.64353	1.87061	28.8605	5.55533	4.19796	3.18796	7.68048	1.5618
1645	27	0	1	3	0	0	0	0	0	0	0	1	2730	1	19.9432	36.6829	29.9086	4.0845	5.9746	6.61855	2.13375	6.46423	4.01581	1.80146	4.49403	3.28479	5.38285	9.07664	8.5805	1.20062	1.66456	1.8255	28.8449	5.55922	4.2046	3.19343	7.68	1.56356
1646	27	0	3	2	0	1	0	0	0	0	0	1	3490	0	19.9432	36.6829	29.1874	4.0845	5.9746	6.48836	2.13375	6.46423	3.87881	1.80146	4.49403	3.17781	5.38285	9.07664	8.43306	1.20062	1.66456	1.80019	28.6045	5.51582	4.15893	3.15777	7.63085	1.55512
1647	30	0	1	2	0	1	0	0	0	0	0	2	3190	1	20.4187	36.7574	29.3965	4.19721	5.98204	6.5858	2.22265	6.46124	3.95706	1.87887	4.48209	3.24338	5.51772	9.11758	8.51876	1.22863	1.6692	1.82603	28.8575	5.58835	4.21365	3.20144	7.71802	1.57462
1648	30	0	1	2	0	1	0	0	0	0	0	1	3550	0	20.4187	36.7574	29.9727	4.19721	5.98204	6.68997	2.22265	6.46124	4.02564	1.87887	4.48209	3.33482	5.51772	9.11758	8.64324	1.22863	1.6692	1.84232	29.0496	5.62307	4.23651	3.23193	7.75952	1.58005
1649	31	0	1	2	0	1	1	0	0	0	0	2	3350	1	20.488	36.7662	29.4457	4.20989	5.99422	6.58345	2.26264	6.44067	3.99077	1.91129	4.46719	3.31193	5.52708	9.1354	8.50517	1.22917	1.6747	1.82484	28.8999	5.59585	4.23136	3.23014	7.72255	1.57623
1650	31	0	3	3	0	1	0	0	0	0	0	1	3640	0	20.488	36.7662	29.8784	4.20989	5.99422	6.62303	2.26264	6.44067	4.01789	1.91129	4.46719	3.28992	5.52708	9.1354	8.56301	1.22917	1.6747	1.82806	29.0442	5.60904	4.2404	3.2228	7.74183	1.57731
1651	29	0	1	3	0	0	1	0	0	0	0	1	3350	1	21.7439	35.5084	30.6331	4.43718	5.7819	6.85693	2.51974	6.21062	4.11065	2.1086	4.2853	3.39768	5.88762	8.78566	8.84559	1.29673	1.61091	1.88688	29.2952	5.69201	4.28034	3.26386	7.83962	1.59817
1652	29	0	3	3	0	1	1	0	0	0	0	2	2300	0	21.7439	35.5084	30.5269	4.43718	5.7819	6.81456	2.51974	6.21062	4.10173	2.1086	4.2853	3.36137	5.88762	8.78566	8.8064	1.29673	1.61091	1.88711	29.2597	5.67788	4.27736	3.25176	7.82656	1.59825
1653	31	0	1	4	0	0	0	0	0	0	0	1	2750	1	21.7439	35.5084	30.6419	4.43718	5.7819	6.8562	2.51974	6.21062	4.15446	2.1086	4.2853	3.45716	5.88762	8.78566	8.86039	1.29673	1.61091	1.89478	29.2981	5.69176	4.29494	3.28369	7.84455	1.60081
1654	31	0	1	1	0	1	1	0	0	0	0	1	3250	0	21.7439	35.5084	30.5269	4.43718	5.7819	6.81456	2.51974	6.21062	4.10173	2.1086	4.2853	3.36137	5.88762	8.78566	8.8064	1.29673	1.61091	1.88711	29.2597	5.67788	4.27736	3.25176	7.82656	1.59825
1655	27	0	1	2	0	0	1	0	0	0	0	2	3050	1	22.2566	35.6074	30.8438	4.5116	5.83306	6.86698	2.61255	6.22218	4.1406	2.18672	4.2862	3.40727	6.03862	8.81875	8.86155	1.3265	1.61697	1.8895	29.5693	5.73721	4.32511	3.2934	7.90631	1.61099
1656	27	0	1	1	0	1	1	0	0	0	0	2	3490	0	22.2566	35.6074	30.3957	4.5116	5.83306	6.80155	2.61255	6.22218	4.06454	2.18672	4.2862	3.33755	6.03862	8.81875	8.76682	1.3265	1.61697	1.88211	29.4199	5.7154	4.29975	3.27016	7.87473	1.60853
1657	27	0	3	3	0	1	1	0	0	0	0	2	3770	1	22.2566	35.6074	30.8438	4.5116	5.83306	6.86698	2.61255	6.22218	4.1406	2.18672	4.2862	3.40727	6.03862	8.81875	8.86155	1.3265	1.61697	1.8895	29.5693	5.73721	4.32511	3.2934	7.90631	1.61099
1658	27	0	1	3	0	0	0	0	0	0	0	2	3320	0	22.2566	35.6074	30.3326	4.5116	5.83306	6.77219	2.61255	6.22218	4.05006	2.18672	4.2862	3.34784	6.03862	8.81875	8.73954	1.3265	1.61697	1.86546	29.3989	5.70562	4.29493	3.27359	7.86563	1.60298
1659	25	1	3	1	0	0	0	0	0	0	0	2	2880	1	23.1218	35.6276	30.4572	4.67813	5.84636	6.86022	2.74709	6.25742	4.04497	2.28267	4.3253	3.3185	6.30971	8.85377	8.76151	1.36939	1.62692	1.89222	29.7355	5.7949	4.34983	3.30882	7.975	1.62951
1660	25	0	1	2	0	0	0	0	0	0	0	1	3200	0	23.1218	35.6276	30.4572	4.67813	5.84636	6.86022	2.74709	6.25742	4.04497	2.28267	4.3253	3.3185	6.30971	8.85377	8.76151	1.36939	1.62692	1.89222	29.7355	5.7949	4.34983	3.30882	7.975	1.62951
1661	23	0	3	2	0	0	0	0	0	0	0	1	3450	1	23.2135	35.8082	29.4825	4.69307	5.89695	6.63758	2.75927	6.29883	3.8628	2.29095	4.3628	3.17275	6.33405	8.91529	8.49637	1.37482	1.63715	1.83757	29.5014	5.74253	4.30697	3.2755	7.91524	1.61651
1662	23	0	3	3	0	0	1	0	0	0	0	2	3710	0	23.2135	35.8082	28.1387	4.69307	5.89695	6.29343	2.75927	6.29883	3.61069	2.29095	4.3628	2.97836	6.33405	8.91529	8.03208	1.37482	1.63715	1.74634	29.0535	5.62782	4.22293	3.2107	7.76047	1.5861
1663	32	0	3	3	0	1	0	0	0	0	0	1	3500	1	23.2135	35.8082	29.6075	4.69307	5.89695	6.67921	2.75927	6.29883	3.89333	2.29095	4.3628	3.19448	6.33405	8.91529	8.54694	1.37482	1.63715	1.84751	29.5431	5.75641	4.31714	3.28274	7.93209	1.61982
1664	32	0	1	2	0	1	0	0	0	0	0	1	3750	0	23.2135	35.8082	27.9874	4.69307	5.89695	6.25017	2.75927	6.29883	3.58198	2.29095	4.3628	2.95591	6.33405	8.91529	7.98201	1.37482	1.63715	1.73466	29.003	5.61339	4.21336	3.20322	7.74378	1.58221
1665	24	0	1	1	0	0	0	0	0	0	0	2	3100	1	23.4011	35.9037	28.379	4.72658	5.93031	6.36216	2.78257	6.32675	3.66009	2.30505	4.39032	3.01559	6.38721	8.94967	8.1216	1.38468	1.64274	1.76772	29.228	5.67302	4.25647	3.23699	7.81949	1.59838
1666	24	0	1	3	0	0	1	0	0	0	0	2	3550	0	23.4011	35.9037	28.1147	4.72658	5.93031	6.29733	2.78257	6.32675	3.6094	2.30505	4.39032	2.97643	6.38721	8.94967	8.02978	1.38468	1.64274	1.75051	29.1398	5.65141	4.23957	3.22393	7.78889	1.59264
1667	27	0	1	2	0	0	0	0	0	0	0	1	1550	1	24.4304	36.0267	27.1195	4.90505	6.02565	6.05245	2.87946	6.40553	3.43862	2.37104	4.46519	2.83816	6.68229	9.00749	7.71813	1.43531	1.6605	1.68986	29.1922	5.66105	4.2412	3.2248	7.80264	1.59523
1668	27	0	1	3	0	0	1	0	0	0	0	1	3080	0	24.4304	36.0267	28.0434	4.90505	6.02565	6.29599	2.87946	6.40553	3.61725	2.37104	4.46519	2.97698	6.68229	9.00749	8.0334	1.43531	1.6605	1.75475	29.5002	5.74223	4.30075	3.27107	7.90772	1.61685
1669	31	0	3	1	0	1	1	0	0	0	0	1	1950	1	24.4304	36.0267	27.1195	4.90505	6.02565	6.05245	2.87946	6.40553	3.43862	2.37104	4.46519	2.83816	6.68229	9.00749	7.71813	1.43531	1.6605	1.68986	29.1922	5.66105	4.2412	3.2248	7.80264	1.59523
1670	31	0	3	3	0	1	1	1	0	0	0	1	3250	0	24.4304	36.0267	28.659	4.90505	6.02565	6.45274	2.87946	6.40553	3.7338	2.37104	4.46519	3.06761	6.68229	9.00749	8.24779	1.43531	1.6605	1.79786	29.7054	5.79448	4.3396	3.30128	7.97919	1.63122
1671	28	0	3	3	0	0	1	0	0	1	0	2	2300	1	24.602	35.8787	27.7591	4.93427	6.00814	6.22515	2.89539	6.40833	3.54686	2.3826	4.46696	2.92369	6.73144	8.96898	7.93381	1.44361	1.65343	1.73824	29.4133	5.72252	4.28353	3.25775	7.87807	1.61176
1672	28	0	1	1	0	0	1	0	0	0	0	2	4480	0	24.602	35.8787	27.4384	4.93427	6.00814	6.13666	2.89539	6.40833	3.48775	2.3826	4.46696	2.87838	6.73144	8.96898	7.82473	1.44361	1.65343	1.71417	29.3064	5.69302	4.26382	3.24264	7.84171	1.60374
1673	30	0	1	1	0	0	0	0	0	0	0	2	2900	1	24.6483	36.1423	28.2232	4.95245	6.08385	6.33896	2.92277	6.43408	3.64655	2.39589	4.49646	2.99514	6.75905	9.05397	8.09987	1.44665	1.67537	1.76652	29.6713	5.79175	4.33447	3.29583	7.97097	1.62951
1674	30	0	1	2	0	0	0	0	0	0	0	2	3050	0	24.6483	36.1423	27.0356	4.95245	6.08385	6.03249	2.92277	6.43408	3.41815	2.39589	4.49646	2.81824	6.75905	9.05397	7.69702	1.44665	1.67537	1.68555	29.2754	5.6896	4.25833	3.23687	7.83668	1.60252
1675	23	0	2	2	0	1	0	0	0	0	0	1	2750	1	24.6893	36.0098	27.1316	4.96497	6.05905	6.04906	2.94017	6.41929	3.4146	2.40659	4.4852	2.82053	6.77367	9.0154	7.71402	1.44904	1.66769	1.69149	29.2769	5.69103	4.25802	3.23744	7.83436	1.60274
1676	23	0	2	2	0	0	1	0	0	0	0	1	3000	0	24.6893	36.0098	27.0087	4.96497	6.05905	6.00897	2.94017	6.41929	3.38821	2.40659	4.4852	2.80135	6.77367	9.0154	7.66672	1.44904	1.66769	1.68156	29.236	5.67767	4.24923	3.23105	7.81859	1.59943
1677	30	0	1	2	0	1	1	0	0	0	0	2	3100	1	24.6893	36.0098	28.3591	4.96497	6.05905	6.36778	2.94017	6.41929	3.64588	2.40659	4.4852	3.00032	6.77367	9.0154	8.1302	1.44904	1.66769	1.77609	29.6861	5.79727	4.33512	3.29737	7.97309	1.63094
1678	30	0	2	1	0	1	0	1	0	0	0	1	2300	0	24.6893	36.0098	27.1316	4.96497	6.05905	6.04906	2.94017	6.41929	3.4146	2.40659	4.4852	2.82053	6.77367	9.0154	7.71402	1.44904	1.66769	1.69149	29.2769	5.69103	4.25802	3.23744	7.83436	1.60274
1679	31	0	1	2	0	0	0	0	0	0	0	2	2620	1	24.6893	36.0098	30.172	4.96497	6.05905	6.76963	2.94017	6.41929	3.97376	2.40659	4.4852	3.25391	6.77367	9.0154	8.62045	1.44904	1.66769	1.8808	30.2904	5.93122	4.44441	3.3819	8.1365	1.66584
1680	31	0	1	2	0	1	0	0	0	0	0	2	2950	0	24.6893	36.0098	27.2645	4.96497	6.05905	6.08558	2.94017	6.41929	3.43956	2.40659	4.4852	2.83856	6.77367	9.0154	7.76603	1.44904	1.66769	1.70132	29.3212	5.7032	4.26634	3.24345	7.8517	1.60602
1681	27	0	3	1	0	1	1	0	0	0	0	2	2600	1	24.8808	36.0019	28.4217	5.00052	6.06613	6.3812	2.96421	6.42632	3.64743	2.42224	4.49669	2.99901	6.83249	9.0119	8.14785	1.45911	1.66837	1.7811	29.7682	5.81595	4.34599	3.30598	7.99741	1.6362
1682	27	0	1	1	0	1	1	0	0	0	0	1	4100	0	24.8808	36.0019	27.3079	5.00052	6.06613	6.09431	2.96421	6.42632	3.43847	2.42224	4.49669	2.83543	6.83249	9.0119	7.77759	1.45911	1.66837	1.70495	29.3969	5.72032	4.27633	3.25145	7.87399	1.61081
1683	32	0	1	2	0	1	0	0	0	0	0	1	3650	1	25.0137	36.1781	27.6517	5.0202	6.11663	6.20107	3.03196	6.4108	3.51634	2.46349	4.49475	2.89986	6.86223	9.07343	7.90306	1.46116	1.68509	1.73343	29.6145	5.7793	4.3197	3.28603	7.94624	1.62656
1684	32	0	1	3	0	1	1	0	1	1	0	1	2770	0	25.0137	36.1781	26.7875	5.0202	6.11663	5.95403	3.03196	6.4108	3.34297	2.46349	4.49475	2.76651	6.86223	9.07343	7.60073	1.46116	1.68509	1.66925	29.3264	5.69696	4.26191	3.24158	7.84546	1.60517
1685	25	0	1	1	0	0	1	0	0	0	0	1	3800	1	24.8272	36.3267	27.2089	4.98677	6.14921	6.07966	3.02785	6.41004	3.43289	2.4591	4.49663	2.83443	6.80408	9.12532	7.76177	1.44825	1.69933	1.69935	29.4543	5.73855	4.29026	3.26339	7.89706	1.61564
1686	25	0	1	3	0	1	0	0	0	1	0	1	3150	0	24.8272	36.3267	28.3582	4.98677	6.14921	6.37688	3.02785	6.41004	3.64993	2.4591	4.49663	3.00471	6.80408	9.12532	8.14569	1.44825	1.69933	1.77805	29.8374	5.83762	4.36261	3.32015	8.02503	1.64188
1687	26	0	3	1	0	1	0	0	0	0	0	2	2770	1	24.8272	36.3267	28.5021	4.98677	6.14921	6.41369	3.02785	6.41004	3.67924	2.4591	4.49663	3.02584	6.80408	9.12532	8.2012	1.44825	1.69933	1.78778	29.8853	5.84989	4.37238	3.32719	8.04353	1.64512
1688	26	0	3	1	0	0	1	0	0	0	0	1	3920	0	24.8272	36.3267	27.3128	4.98677	6.14921	6.10151	3.02785	6.41004	3.45032	2.4591	4.49663	2.84938	6.80408	9.12532	7.78855	1.44825	1.69933	1.70453	29.4889	5.74583	4.29607	3.26837	7.90598	1.61737
1689	28	0	1	3	0	0	0	0	0	0	0	1	3180	1	24.5087	36.7124	28.9761	4.92087	6.24618	6.53141	3.07444	6.41888	3.73991	2.48011	4.52924	3.06631	6.69227	9.26667	8.36235	1.42084	1.73581	1.82143	30.0657	5.89949	4.41108	3.35855	8.1071	1.65936
1690	28	0	1	2	0	0	0	0	0	0	0	1	3200	0	24.5087	36.7124	27.072	4.92087	6.24618	6.0411	3.07444	6.41888	3.38651	2.48011	4.52924	2.79151	6.69227	9.26667	7.71443	1.42084	1.73581	1.69002	29.431	5.73605	4.29328	3.26695	7.89112	1.61556
1691	29	0	3	3	0	1	0	0	1	0	0	2	3500	1	24.5586	36.9653	26.7988	4.93191	6.3159	5.95958	3.1465	6.3955	3.34209	2.52436	4.52892	2.75325	6.68089	9.37221	7.62176	1.41485	1.76355	1.67016	29.4409	5.7358	4.2947	3.26884	7.89162	1.61619
1692	29	0	1	3	0	0	0	0	1	0	0	1	3090	0	24.5586	36.9653	27.1887	4.93191	6.3159	6.06691	3.1465	6.3955	3.41652	2.52436	4.52892	2.80905	6.68089	9.37221	7.75998	1.41485	1.76355	1.69742	29.5709	5.77157	4.31951	3.28745	7.93769	1.62527
1693	28	0	1	3	0	1	1	0	0	1	0	1	3080	1	24.5298	37.1052	25.0664	4.91505	6.35601	5.526	3.18592	6.3781	3.0698	2.54161	4.52643	2.54198	6.66457	9.40566	7.07351	1.40637	1.77717	1.55673	28.9005	5.59902	4.21127	3.20334	7.71458	1.58009
1694	28	0	3	2	0	1	1	0	1	0	0	2	3360	0	24.5298	37.1052	25.7799	4.91505	6.35601	5.70413	3.18592	6.3781	3.16944	2.54161	4.52643	2.62786	6.66457	9.40566	7.30141	1.40637	1.77717	1.60701	29.1383	5.6584	4.24449	3.23197	7.79055	1.59685
1695	32	0	1	2	0	1	0	0	0	0	0	1	3270	1	24.3631	37.1915	25.6601	4.87238	6.40038	5.6714	3.19615	6.34314	3.15771	2.53916	4.51618	2.61659	6.61075	9.44657	7.25968	1.39081	1.79004	1.59899	29.0715	5.64805	4.23233	3.22397	7.77233	1.59328
1696	32	0	2	1	0	0	1	0	0	0	0	2	2750	0	24.3631	37.1915	24.948	4.87238	6.40038	5.49385	3.19615	6.34314	3.05787	2.53916	4.51618	2.53063	6.61075	9.44657	7.03251	1.39081	1.79004	1.54878	28.8342	5.58887	4.19905	3.19532	7.69661	1.57654
1697	25	0	1	2	0	0	0	0	0	0	0	1	3010	1	24.3112	37.3158	26.2209	4.83779	6.45135	5.82647	3.22983	6.31373	3.27789	2.55307	4.50665	2.70541	6.58043	9.50697	7.45383	1.38145	1.80741	1.63402	29.2826	5.7052	4.27382	3.25504	7.84708	1.60762
1698	25	0	1	3	0	0	1	0	0	0	0	2	3200	0	24.3112	37.3158	26.812	4.83779	6.45135	5.9926	3.22983	6.31373	3.4013	2.55307	4.50665	2.80051	6.58043	9.50697	7.66306	1.38145	1.80741	1.67689	29.4797	5.76058	4.31495	3.28674	7.91682	1.62192
1699	26	0	3	4	0	0	0	0	0	0	0	2	2800	1	24.3112	37.3158	24.391	4.83779	6.45135	5.35958	3.22983	6.31373	2.98503	2.55307	4.50665	2.47315	6.58043	9.50697	6.84967	1.38145	1.80741	1.50931	28.6727	5.54957	4.1762	3.17762	7.64569	1.56606
1700	26	0	1	1	0	1	1	0	0	0	0	1	3400	0	24.3112	37.3158	25.4863	4.83779	6.45135	5.63499	3.22983	6.31373	3.1493	2.55307	4.50665	2.60771	6.58043	9.50697	7.20637	1.38145	1.80741	1.58496	29.0378	5.64138	4.23095	3.22247	7.76459	1.59127
1701	28	0	3	2	0	0	1	0	0	0	0	2	2800	1	24.3112	37.3158	24.2041	4.83779	6.45135	5.31669	3.22983	6.31373	2.95875	2.55307	4.50665	2.4521	6.58043	9.50697	6.79334	1.38145	1.80741	1.49744	28.6104	5.53527	4.16743	3.17061	7.62691	1.5621
1702	28	0	3	3	0	1	0	0	1	0	0	2	2930	0	24.3112	37.3158	26.2209	4.83779	6.45135	5.82647	3.22983	6.31373	3.27789	2.55307	4.50665	2.70541	6.58043	9.50697	7.45383	1.38145	1.80741	1.63402	29.2826	5.7052	4.27382	3.25504	7.84708	1.60762
1703	30	0	3	3	0	1	1	0	0	0	0	2	3980	1	24.7191	37.0916	26.7712	4.87109	6.46298	5.99218	3.40339	6.15616	3.42783	2.65456	4.41872	2.82018	6.67246	9.47251	7.65489	1.39218	1.81765	1.6662	29.5273	5.77541	4.32913	3.29782	7.93329	1.62534
1704	30	0	1	2	0	1	0	0	1	0	0	1	3690	0	24.7191	37.0916	24.1632	4.87109	6.46298	5.30341	3.40339	6.15616	2.9683	2.65456	4.41872	2.45936	6.67246	9.47251	6.77721	1.39218	1.81765	1.48607	28.658	5.54583	4.17595	3.17755	7.64073	1.5653
1705	27	0	1	2	0	0	0	0	0	0	0	1	2900	1	24.5688	36.9513	23.21	4.79216	6.47002	5.06445	3.47281	6.02753	2.83244	2.66596	4.35568	2.35596	6.58768	9.47522	6.47247	1.36739	1.82706	1.4201	28.2434	5.44221	4.11093	3.12586	7.51179	1.53818
1706	27	0	1	2	0	0	0	0	0	0	0	2	2620	0	24.5688	36.9513	24.9809	4.79216	6.47002	5.51692	3.47281	6.02753	3.11716	2.66596	4.35568	2.58759	6.58768	9.47522	7.04295	1.36739	1.82706	1.54389	28.8337	5.59304	4.20583	3.20308	7.70195	1.57944
1707	26	0	1	2	0	1	1	0	1	0	0	1	2020	1	24.5466	36.8639	24.5087	4.7675	6.46669	5.3896	3.50219	5.9826	3.06213	2.68485	4.3227	2.5427	6.56418	9.46976	6.88999	1.36059	1.83082	1.5062	28.6397	5.54126	4.18231	3.18342	7.64131	1.56587
1708	26	0	3	3	0	0	1	0	0	0	0	1	2780	0	24.5466	36.8639	23.0919	4.7675	6.46669	5.03086	3.50219	5.9826	2.81679	2.68485	4.3227	2.34503	6.56418	9.46976	6.43206	1.36059	1.83082	1.40767	28.1675	5.42168	4.10053	3.11753	7.48867	1.53303
1709	28	0	1	1	0	1	0	0	0	0	0	2	3770	1	24.5466	36.8639	25.5115	4.7675	6.46669	5.64076	3.50219	5.9826	3.21759	2.68485	4.3227	2.6667	6.56418	9.46976	7.21631	1.36059	1.83082	1.57064	28.974	5.62498	4.23413	3.22475	7.75008	1.58735
1710	28	0	1	3	0	0	1	0	0	0	0	1	3650	0	24.5466	36.8639	23.7671	4.7675	6.46669	5.21256	3.50219	5.9826	2.94171	2.68485	4.3227	2.44357	6.56418	9.46976	6.65657	1.36059	1.83082	1.45697	28.3925	5.48225	4.14217	3.15037	7.5635	1.54946
1711	29	0	3	4	0	0	1	0	0	0	0	2	2350	1	24.8099	36.6542	24.4574	4.81429	6.4388	5.376	3.59407	5.89728	3.06365	2.75032	4.25941	2.54684	6.61729	9.44006	6.87469	1.36728	1.82823	1.50313	28.6405	5.54303	4.185	3.18552	7.64401	1.56621
1712	29	0	1	2	0	1	1	0	1	0	0	1	3230	0	24.8099	36.6542	25.927	4.81429	6.4388	5.77124	3.59407	5.89728	3.31692	2.75032	4.25941	2.74364	6.61729	9.44006	7.37704	1.36728	1.82823	1.6031	29.1303	5.67478	4.26943	3.25112	7.81146	1.59954
1713	29	0	1	2	0	0	1	0	0	0	0	2	3750	1	25.1007	36.337	23.2259	4.85769	6.39189	5.0664	3.6741	5.84556	2.82663	2.79919	4.2301	2.35852	6.6932	9.3501	6.49199	1.37837	1.81052	1.42427	28.2212	5.43866	4.11543	3.12927	7.51176	1.53772
1714	29	0	1	1	0	0	0	0	0	1	0	1	3330	0	25.1007	36.337	23.3369	4.85769	6.39189	5.0961	3.6741	5.84556	2.84709	2.79919	4.2301	2.37546	6.6932	9.3501	6.52766	1.37837	1.81052	1.43273	28.2582	5.44856	4.12225	3.13491	7.52365	1.54054
1715	30	0	1	2	0	0	1	0	0	0	0	1	3150	0	24.9585	36.944	24.0193	4.82319	6.52431	5.29095	3.68463	5.96622	2.89186	2.79475	4.33733	2.40625	6.66002	9.49437	6.814	1.36585	1.83925	1.4973	28.6406	5.54615	4.18091	3.17944	7.65613	1.56747
1716	30	0	1	1	0	0	1	0	0	1	0	2	3380	1	24.9585	36.944	24.7154	4.82319	6.52431	5.47014	3.68463	5.96622	2.98508	2.79475	4.33733	2.48781	6.66002	9.49437	7.04728	1.36585	1.83925	1.54712	28.8726	5.60588	4.21198	3.20663	7.73389	1.58407
1717	27	0	1	2	0	0	0	0	0	0	0	2	2870	1	24.8822	37.3011	22.2258	4.80783	6.5959	4.85248	3.70312	6.02129	2.55794	2.79768	4.39477	2.13331	6.64129	9.58276	6.25918	1.35866	1.85815	1.37741	28.1364	5.41874	4.09412	3.10859	7.49441	1.5314
1718	27	0	1	2	0	0	1	0	0	0	0	1	3640	0	24.8822	37.3011	22.4084	4.80783	6.5959	4.90175	3.70312	6.02129	2.59554	2.79768	4.39477	2.1693	6.64129	9.58276	6.31599	1.35866	1.85815	1.39288	28.1972	5.43516	4.10665	3.12059	7.51334	1.53656
1719	26	0	1	2	0	0	0	0	0	0	0	1	3400	1	24.7607	37.7467	22.2858	4.78344	6.70518	4.89911	3.757	6.0412	2.57015	2.81701	4.43859	2.14514	6.60579	9.72723	6.30005	1.34609	1.88873	1.39841	28.2644	5.46258	4.12278	3.13358	7.54436	1.54441
1720	26	0	1	3	0	1	0	0	0	0	0	2	3050	0	24.7607	37.7467	22.097	4.78344	6.70518	4.84414	3.757	6.0412	2.53489	2.81701	4.43859	2.11647	6.60579	9.72723	6.23555	1.34609	1.88873	1.38239	28.2015	5.44425	4.11103	3.12402	7.52286	1.53907
1721	32	0	1	3	0	0	1	0	0	0	0	1	3560	1	24.8491	37.8553	21.8333	4.78978	6.74815	4.77421	3.80753	6.0153	2.494	2.84393	4.42975	2.08188	6.63702	9.75875	6.15042	1.34673	1.90236	1.36113	28.1792	5.43738	4.10561	3.11852	7.5154	1.53674
1722	32	0	3	1	0	1	1	0	0	0	0	2	3460	0	24.8491	37.8553	21.7772	4.78978	6.74815	4.75901	3.80753	6.0153	2.48344	2.84393	4.42975	2.07056	6.63702	9.75875	6.13344	1.34673	1.90236	1.35606	28.1605	5.43231	4.10209	3.11474	7.50974	1.53505
1723	29	0	1	1	0	0	1	0	0	0	0	1	3450	1	25.1878	37.7543	22.0241	4.81472	6.77472	4.84711	3.95053	5.8964	2.56062	2.93054	4.35924	2.14206	6.74431	9.72076	6.23458	1.35352	1.90923	1.38586	28.322	5.47885	4.13585	3.14395	7.56655	1.54954
1724	29	0	3	1	0	1	0	1	1	0	0	2	2700	0	25.1878	37.7543	21.4243	4.81472	6.77472	4.6732	3.95053	5.8964	2.44093	2.93054	4.35924	2.03748	6.74431	9.72076	6.03164	1.35352	1.90923	1.33415	28.1221	5.42088	4.09595	3.10909	7.4989	1.5323
1725	24	0	1	3	0	0	1	0	0	0	0	2	3640	0	25.372	37.5905	21.7856	4.83459	6.76545	4.7662	4.02223	5.83401	2.50802	2.97391	4.32295	2.10086	6.79701	9.68085	6.14507	1.36006	1.90477	1.36409	28.2494	5.45541	4.12142	3.13257	7.54098	1.54297
1726	24	0	3	2	0	0	1	0	0	0	0	2	3050	1	25.372	37.5905	21.6594	4.83459	6.76545	4.72923	4.02223	5.83401	2.47961	2.97391	4.32295	2.07486	6.79701	9.68085	6.10091	1.36006	1.90477	1.35257	28.2073	5.44309	4.11195	3.12391	7.52626	1.53913
1727	29	0	3	1	0	1	0	0	0	0	0	2	2650	1	25.372	37.5905	21.0766	4.83459	6.76545	4.58154	4.02223	5.83401	2.38574	2.97391	4.32295	1.99549	6.79701	9.68085	5.91062	1.36006	1.90477	1.31077	28.013	5.39386	4.08066	3.09745	7.46283	1.5252
1728	29	0	3	3	0	0	0	0	0	0	0	1	3150	0	25.372	37.5905	21.7856	4.83459	6.76545	4.7662	4.02223	5.83401	2.50802	2.97391	4.32295	2.10086	6.79701	9.68085	6.14507	1.36006	1.90477	1.36409	28.2494	5.45541	4.12142	3.13257	7.54098	1.54297
1729	30	0	1	2	0	0	0	0	0	0	0	1	3360	1	25.8135	37.2801	21.1261	4.898	6.74184	4.59174	4.14473	5.72849	2.39985	3.05345	4.25342	2.00907	6.9325	9.59287	5.92715	1.38383	1.8921	1.31318	28.0732	5.41052	4.09102	3.10531	7.48417	1.5297
1730	30	0	1	3	0	1	0	0	0	0	0	2	3070	0	25.8135	37.2801	21.2599	4.898	6.74184	4.63275	4.14473	5.72849	2.42694	3.05345	4.25342	2.03075	6.9325	9.59287	5.97462	1.38383	1.8921	1.32438	28.1178	5.42419	4.10005	3.11254	7.5	1.53343
1731	26	0	1	3	0	0	0	0	0	0	0	1	3190	1	27.3288	36.4759	21.4454	5.15346	6.66081	4.67457	4.49408	5.4779	2.46833	3.28689	4.10219	2.06854	7.32262	9.42226	6.04066	1.45418	1.86737	1.34148	28.4167	5.49628	4.14677	3.15254	7.59518	1.55435
1732	26	0	1	4	0	1	0	0	1	0	0	1	3650	0	27.3288	36.4759	21.2025	5.15346	6.66081	4.60661	4.49408	5.4779	2.41538	3.28689	4.10219	2.01809	7.32262	9.42226	5.96077	1.45418	1.86737	1.31948	28.3358	5.47363	4.12912	3.13572	7.56855	1.54701
1733	26	0	1	2	0	0	0	0	0	0	0	1	3430	1	28.0031	36.4083	20.1524	5.29143	6.67221	4.3497	4.62307	5.44923	2.24897	3.37948	4.10536	1.86345	7.51888	9.4232	5.62476	1.48975	1.87609	1.24456	28.1879	5.43778	4.10709	3.11609	7.52228	1.5368
1734	26	0	3	2	0	1	1	0	1	0	0	1	3430	0	28.0031	36.4083	20.5093	5.29143	6.67221	4.4408	4.62307	5.44923	2.30361	3.37948	4.10536	1.90358	7.51888	9.4232	5.74846	1.48975	1.87609	1.26843	28.3069	5.46815	4.1253	3.12947	7.56351	1.54476
1735	28	0	1	3	0	0	0	0	0	0	0	2	2750	1	27.9487	36.7058	19.7922	5.27468	6.74737	4.26209	4.64004	5.47453	2.19054	3.38489	4.13813	1.81024	7.50568	9.51416	5.51539	1.48384	1.90671	1.2096	28.1489	5.42805	4.1017	3.11109	7.51174	1.53338
1736	28	0	1	3	0	0	1	0	0	0	0	2	3950	0	27.9487	36.7058	19.3453	5.27468	6.74737	4.13986	4.64004	5.47453	2.10381	3.38489	4.13813	1.73931	7.50568	9.51416	5.36659	1.48384	1.90671	1.1757	27.9999	5.3873	4.07279	3.08744	7.46214	1.52208
1737	30	0	1	3	0	1	1	0	0	0	0	2	3740	1	27.9487	36.7058	19.9	5.27468	6.74737	4.29027	4.64004	5.47453	2.20723	3.38489	4.13813	1.82349	7.50568	9.51416	5.54987	1.48384	1.90671	1.21756	28.1848	5.43744	4.10727	3.1155	7.52324	1.53604
1738	30	0	1	1	0	1	1	0	1	0	0	1	3000	0	27.9487	36.7058	20.1017	5.27468	6.74737	4.3457	4.64004	5.47453	2.24284	3.38489	4.13813	1.84904	7.50568	9.51416	5.62389	1.48384	1.90671	1.23157	28.252	5.45592	4.11914	3.12402	7.54791	1.54071
1739	29	0	1	2	0	0	0	0	0	0	0	2	2800	1	28.2797	36.7322	19.1227	5.30099	6.80318	4.07605	4.76832	5.39917	2.06193	3.45822	4.11468	1.69994	7.58789	9.5373	5.29018	1.49082	1.92273	1.15847	28.0449	5.39341	4.07648	3.09094	7.47179	1.52401
1740	29	0	3	1	0	1	1	0	0	0	0	1	3340	0	28.2797	36.7322	19.6043	5.30099	6.80318	4.19835	4.76832	5.39917	2.14327	3.45822	4.11468	1.7665	7.58789	9.5373	5.43999	1.49082	1.92273	1.19297	28.2054	5.43417	4.10359	3.11313	7.52172	1.53551
1741	33	0	1	3	0	1	0	0	0	1	0	2	3200	1	28.2797	36.7322	19.6043	5.30099	6.80318	4.19835	4.76832	5.39917	2.14327	3.45822	4.11468	1.7665	7.58789	9.5373	5.43999	1.49082	1.92273	1.19297	28.2054	5.43417	4.10359	3.11313	7.52172	1.53551
1742	33	0	1	3	0	1	0	0	0	0	0	1	3450	0	28.2797	36.7322	19.6043	5.30099	6.80318	4.19835	4.76832	5.39917	2.14327	3.45822	4.11468	1.7665	7.58789	9.5373	5.43999	1.49082	1.92273	1.19297	28.2054	5.43417	4.10359	3.11313	7.52172	1.53551
1743	28	0	3	3	0	0	0	0	0	0	0	2	3370	1	28.5789	36.7443	20.2946	5.33782	6.82978	4.40918	4.82557	5.38886	2.27218	3.49674	4.11329	1.8735	7.67952	9.53802	5.6859	1.50773	1.92233	1.25385	28.5392	5.52559	4.1622	3.16118	7.63448	1.5613
1744	28	0	1	2	0	1	1	0	1	1	0	1	3700	0	28.5789	36.7443	19.2604	5.33782	6.82978	4.12356	4.82557	5.38886	2.08266	3.49674	4.11329	1.71821	7.67952	9.53802	5.33087	1.50773	1.92233	1.17345	28.1945	5.43039	4.09903	3.10941	7.51614	1.5345
1745	29	0	1	3	0	1	1	1	0	0	0	2	2850	1	28.8418	36.6227	19.8545	5.36535	6.83391	4.28608	4.88905	5.33909	2.19272	3.53968	4.08173	1.80201	7.75863	9.50029	5.54318	1.52169	1.91736	1.21625	28.4397	5.49511	4.14029	3.14114	7.6007	1.55176
1746	29	0	2	2	0	0	1	0	0	0	0	2	3200	0	28.8418	36.6227	19.5787	5.36535	6.83391	4.2211	4.88905	5.33909	2.15486	3.53968	4.08173	1.77506	7.75863	9.50029	5.44856	1.52169	1.91736	1.20005	28.3478	5.47345	4.12767	3.13216	7.56916	1.54637
1747	31	0	3	3	0	1	0	0	0	0	0	1	3100	1	28.8418	36.6227	18.8524	5.36535	6.83391	4.01928	4.88905	5.33909	2.02211	3.53968	4.08173	1.66957	7.75863	9.50029	5.20716	1.52169	1.91736	1.14416	28.1057	5.40618	4.08342	3.09699	7.48869	1.52773
1748	31	0	1	3	0	1	0	0	0	0	0	2	3780	0	28.8418	36.6227	18.3754	5.36535	6.83391	3.89851	4.88905	5.33909	1.95064	3.53968	4.08173	1.61296	7.75863	9.50029	5.05808	1.52169	1.91736	1.11084	27.9466	5.36593	4.0596	3.07812	7.439	1.51663
[truncated: 684 more rows]
