# Supplementary material for: Associations of PM2.5 and its components with term preterm rupture of membranes: a retrospective study
Source: PeerJ. 2025 Jan 31;13:e18886. doi: 10.7717/peerj.18886 (PMC11789663; doi:10.7717/peerj.18886)
Supplement: Supplemental Information 1 [file peerj-13-18886-s001.docx]

Table S1 Spearman correlation coefficients for mean daily concentrations of PM2.5 and its components

|  | PM2.5 | SO42- | NO3- | NH4+ | OM | BC |
| --- | --- | --- | --- | --- | --- | --- |
| PM2.5 | 1.000 |  |  |  |  |  |
| SO42- | 0.973 | 1.000 |  |  |  |  |
| NO3- | 0.933 | 0.853 | 1.000 |  |  |  |
| NH4+ | 0.964 | 0.905 | 0.990 | 1.000 |  |  |
| OM | 0.990 | 0.984 | 0.898 | 0.941 | 1.000 |  |
| BC | 0.969 | 0.988 | 0.839 | 0.892 | 0.989 | 1.000 |

*PM2.5*, particulate matter with aerodynamic diameter of ≤2.5μm. *SO42-*,sulfate. *NO3-*, nitrate. *NH4+*, ammonium. *OM*, organic matter. *BC*, black carbon.

All correlations are significant at *P* <0.001
